# Supplementary material for: The Role of Fur in the Transcriptional and Iron Homeostatic Response of Enterococcus faecalis
Source: Front Microbiol. 2018 Jul 17;9:1580. doi: 10.3389/fmicb.2018.01580 (PMC6056675; doi:10.3389/fmicb.2018.01580)
Supplement: DATA SHEET S1 — RNAseq complete data. [file Data_Sheet_1.XLSX]

## Sheet: Complete data
GENE ID V583	RNAseq WT vs WT FelogFC	RNAseq WT vs WT FePValue	RNAseq WT vs WT DPDlogFC	RNAseq WT vs WT DPDPValue	RNAseq WT vs MUTlogFC	RNAseq WT vs MUTPValue	RNAseq MUT vs MUT FelogFC	RNAseq MUT vs MUT FePValue	RNAseq MUT vs MUT DPDlogFC	RNAseq MUT vs MUT DPDPValue
EF0001	0.241108	0.0136836	-0.115513	0.178481	-0.2996	0.00283304	0.501407	7.75543e-12	0.241436	0.000463379
EF0002	-0.127283	0.187365	-0.276181	0.00738543	0.0625556	0.541602	-0.275273	0.000751871	-0.348727	1.63824e-06
EF0003	0.348027	0.00168304	1.19868	4.60331e-39	-0.0650958	0.517436	-0.105859	0.228249	1.26145	2.96049e-44
EF0004	-0.201987	0.00625482	0.888364	3.21246e-37	-0.0757077	0.362541	-0.475374	3.61442e-10	0.885161	4.7789e-27
EF0007	-0.116747	0.539421	1.58106	8.54302e-18	0.204173	0.335318	-0.187534	0.192049	1.39252	8.10795e-22
EF0008	-0.0337751	0.859446	1.57391	2.61088e-16	0.24388	0.253519	-0.119439	0.391636	1.29051	1.9944e-22
EF0009	-0.0498246	0.800115	1.61003	4.39212e-18	0.187825	0.376139	-0.13653	0.322333	1.38253	1.78337e-22
EF0011	-0.145744	0.401355	-1.0342	1.59147e-08	0.00257581	0.988552	-0.104513	0.279581	-0.969212	3.65525e-36
EF0012	-0.143079	0.109141	-0.885385	7.30495e-28	0.0934826	0.337059	-0.216332	0.00337335	-0.993419	1.71112e-37
EF0013	0.058599	0.407818	-0.573553	1.2368e-11	-0.0433673	0.663579	-0.657209	1.53292e-19	-0.377399	1.1166e-07
EF0014	0.271642	0.00439698	1.65888	2.77326e-68	-0.403652	0.0233064	0.475317	1.52888e-06	1.96666	7.80993e-127
EF0016	0.602812	1.21079e-09	-0.362617	1.52027e-06	-0.202591	0.0308315	0.205157	0.0266707	0.0410173	0.645636
EF0017	0.255859	0.121939	0.0448425	0.78396	0.0729769	0.666304	0.181442	0.0500408	0.000463848	0.995718
EF0018	-0.122734	0.178159	-0.741574	2.42715e-19	0.0406539	0.689783	-0.091068	0.247227	-0.650834	4.61471e-19
EF0019	-0.528383	0.00298087	0.545814	0.000968967	-0.102229	0.572828	-0.567823	3.87565e-07	0.307516	0.00153848
EF0020	-0.561482	0.00239671	0.928255	2.38742e-07	-0.172614	0.350345	-0.438785	3.95702e-05	0.513338	9.45459e-11
EF0020	-0.561482	0.00239671	0.928255	2.38742e-07	-0.172614	0.350345	-0.438785	3.95702e-05	0.513338	9.45459e-11
EF0021	-0.758844	2.76733e-05	1.10218	2.52287e-09	-0.123951	0.493744	-0.779008	2.60219e-12	0.696295	2.26292e-16
EF0021	-0.758844	2.76733e-05	1.10218	2.52287e-09	-0.123951	0.493744	-0.779008	2.60219e-12	0.696295	2.26292e-16
EF0022	-0.755605	4.96947e-05	1.24142	1.47926e-10	-0.031964	0.864681	-0.847509	9.15933e-13	0.87059	9.64042e-20
EF0022	-0.755605	4.96947e-05	1.24142	1.47926e-10	-0.031964	0.864681	-0.847509	9.15933e-13	0.87059	9.64042e-20
EF0024	0.0916953	0.24794	1.89009	1.25838e-126	-0.210954	0.00988319	-0.447069	1.35845e-07	2.07302	1.29712e-113
EF0024	0.0916953	0.24794	1.89009	1.25838e-126	-0.210954	0.00988319	-0.447069	1.35845e-07	2.07302	1.29712e-113
EF0025	-0.389094	0.025594	-0.670308	2.90768e-05	0.476792	0.0131149	-0.804057	1.58649e-05	-0.377251	0.0312878
EF0026	-0.748395	3.41034e-13	-0.0488836	0.603089	-0.105921	0.338362	0.0212375	0.862163	-0.0912822	0.443783
EF0027	0.12813	0.320377	0.859889	6.14663e-14	-0.021366	0.870972	0.512672	0.00161543	0.817183	9.69572e-12
EF0028	-1.53348	1.32211e-10	-0.321683	0.206023	-0.139452	0.630447	-1.86958	1.72122e-15	-0.116074	0.67581
EF0029	-1.11568	0.000979538	-0.601614	0.108849	-0.900333	0.0159414	-1.02527	0.000116052	0.515711	0.0811141
EF0030	0.406036	0.0104054	-0.745863	1.14663e-10	0.086708	0.591072	-0.627195	6.59204e-05	-0.763363	3.008e-06
EF0031	0.215467	0.0222237	-1.24905	3.14911e-51	0.296146	0.00636674	-0.232166	0.00823734	-1.5172	4.12433e-72
EF0032	0.0431655	0.669713	-0.75001	5.35793e-16	-0.183301	0.0898562	0.0633952	0.394867	-0.495198	4.50314e-10
EF0034	-0.158242	0.264773	-0.626154	1.48954e-08	-0.1022	0.451422	-0.280383	0.0514953	-0.511249	4.95115e-06
EF0035	0.178015	0.196958	-0.754385	2.33018e-15	-0.0156518	0.934483	0.252267	0.0580938	-0.699482	1.34728e-10
EF0036	0.253899	0.0306158	-1.18152	1.15598e-51	0.0596052	0.593261	0.0927982	0.467503	-1.08604	1.38927e-30
EF0037	0.214985	0.0304418	-0.393453	3.22294e-06	0.325228	0.00108268	-0.368041	4.10399e-07	-0.679975	4.95224e-22
EF0038	0.759899	4.39552e-07	-1.0151	1.21521e-28	-0.0982435	0.40338	0.158582	0.169046	-0.698333	7.03624e-13
EF0039	0.235888	0.00157944	0.263915	5.452e-05	0.0357944	0.640838	0.559946	1.34383e-11	0.402685	3.87398e-07
EF0040	-0.284662	0.0887972	0.141248	0.383526	0.1338	0.431305	-0.298984	0.00164375	0.0385357	0.643941
EF0041	-0.77726	1.87378e-17	0.0574223	0.50493	-0.0299815	0.76872	-0.715313	2.71945e-22	0.00247044	0.975113
EF0042	-0.413325	6.33837e-06	0.0277223	0.607303	-0.0584433	0.44198	-0.310293	2.45514e-05	0.0654726	0.355726
EF0043	-0.332226	0.0865749	0.481826	0.0106192	0.0881413	0.647707	-0.252022	0.0130757	0.360749	2.83896e-06
EF0044	-0.636184	7.7937e-11	0.822721	4.29291e-20	0.350976	0.000805304	-0.507912	6.49855e-11	0.220592	0.00458644
EF0045	-0.524229	0.00217679	0.943992	1.01648e-21	0.30123	0.0748455	-0.428036	8.24122e-06	0.396999	2.19082e-07
EF0046	-0.578919	9.80106e-10	0.971148	2.37083e-52	0.172214	0.0284094	-0.484867	3.74521e-10	0.585576	1.52934e-14
EF0047	-0.596723	1.47182e-11	1.20038	4.66138e-46	0.041951	0.670108	-0.69087	7.40091e-21	1.04888	2.02448e-47
EF0048	-0.658146	3.1495e-14	1.34183	1.65157e-58	-0.0696695	0.434109	-0.953543	7.75012e-27	1.53448	6.66852e-82
EF0050	-0.636622	1.39377e-07	-0.0829248	0.315622	-0.301115	0.0118167	-1.27418	4.37493e-53	0.38328	4.68691e-06
EF0050	-0.636622	1.39377e-07	-0.0829248	0.315622	-0.301115	0.0118167	-1.27418	4.37493e-53	0.38328	4.68691e-06
EF0051	0.313989	0.000925847	-0.37317	7.96275e-07	-0.174783	0.0655459	-0.684258	7.0112e-12	0.0280063	0.770674
EF0051	0.313989	0.000925847	-0.37317	7.96275e-07	-0.174783	0.0655459	-0.684258	7.0112e-12	0.0280063	0.770674
EF0055	-0.668008	2.82499e-08	0.715971	1.29612e-13	-0.173674	0.107302	0.374326	0.00309289	1.09298	4.7146e-22
EF0055	-0.668008	2.82499e-08	0.715971	1.29612e-13	-0.173674	0.107302	0.374326	0.00309289	1.09298	4.7146e-22
EF0055	-0.668008	2.82499e-08	0.715971	1.29612e-13	-0.173674	0.107302	0.374326	0.00309289	1.09298	4.7146e-22
EF0055	-0.668008	2.82499e-08	0.715971	1.29612e-13	-0.173674	0.107302	0.374326	0.00309289	1.09298	4.7146e-22
EF0055	-0.668008	2.82499e-08	0.715971	1.29612e-13	-0.173674	0.107302	0.374326	0.00309289	1.09298	4.7146e-22
EF0055	-0.668008	2.82499e-08	0.715971	1.29612e-13	-0.173674	0.107302	0.374326	0.00309289	1.09298	4.7146e-22
EF0055	-0.668008	2.82499e-08	0.715971	1.29612e-13	-0.173674	0.107302	0.374326	0.00309289	1.09298	4.7146e-22
EF0055	-0.668008	2.82499e-08	0.715971	1.29612e-13	-0.173674	0.107302	0.374326	0.00309289	1.09298	4.7146e-22
EF0055	-0.668008	2.82499e-08	0.715971	1.29612e-13	-0.173674	0.107302	0.374326	0.00309289	1.09298	4.7146e-22
EF0055	-0.668008	2.82499e-08	0.715971	1.29612e-13	-0.173674	0.107302	0.374326	0.00309289	1.09298	4.7146e-22
EF0056	-1.4951	3.35832e-36	0.650178	2.70466e-08	-0.227366	0.0897374	-0.224177	0.111542	0.792252	6.53377e-09
EF0056	-1.4951	3.35832e-36	0.650178	2.70466e-08	-0.227366	0.0897374	-0.224177	0.111542	0.792252	6.53377e-09
EF0056	-1.4951	3.35832e-36	0.650178	2.70466e-08	-0.227366	0.0897374	-0.224177	0.111542	0.792252	6.53377e-09
EF0056	-1.4951	3.35832e-36	0.650178	2.70466e-08	-0.227366	0.0897374	-0.224177	0.111542	0.792252	6.53377e-09
EF0056	-1.4951	3.35832e-36	0.650178	2.70466e-08	-0.227366	0.0897374	-0.224177	0.111542	0.792252	6.53377e-09
EF0056	-1.4951	3.35832e-36	0.650178	2.70466e-08	-0.227366	0.0897374	-0.224177	0.111542	0.792252	6.53377e-09
EF0056	-1.4951	3.35832e-36	0.650178	2.70466e-08	-0.227366	0.0897374	-0.224177	0.111542	0.792252	6.53377e-09
EF0056	-1.4951	3.35832e-36	0.650178	2.70466e-08	-0.227366	0.0897374	-0.224177	0.111542	0.792252	6.53377e-09
EF0056	-1.4951	3.35832e-36	0.650178	2.70466e-08	-0.227366	0.0897374	-0.224177	0.111542	0.792252	6.53377e-09
EF0056	-1.4951	3.35832e-36	0.650178	2.70466e-08	-0.227366	0.0897374	-0.224177	0.111542	0.792252	6.53377e-09
EF0057	-1.90541	3.56968e-55	0.233577	0.059826	-0.122565	0.382888	-0.913075	7.08076e-12	0.354094	0.00613008
EF0057	-1.90541	3.56968e-55	0.233577	0.059826	-0.122565	0.382888	-0.913075	7.08076e-12	0.354094	0.00613008
EF0057	-1.90541	3.56968e-55	0.233577	0.059826	-0.122565	0.382888	-0.913075	7.08076e-12	0.354094	0.00613008
EF0057	-1.90541	3.56968e-55	0.233577	0.059826	-0.122565	0.382888	-0.913075	7.08076e-12	0.354094	0.00613008
EF0057	-1.90541	3.56968e-55	0.233577	0.059826	-0.122565	0.382888	-0.913075	7.08076e-12	0.354094	0.00613008
EF0057	-1.90541	3.56968e-55	0.233577	0.059826	-0.122565	0.382888	-0.913075	7.08076e-12	0.354094	0.00613008
EF0057	-1.90541	3.56968e-55	0.233577	0.059826	-0.122565	0.382888	-0.913075	7.08076e-12	0.354094	0.00613008
EF0057	-1.90541	3.56968e-55	0.233577	0.059826	-0.122565	0.382888	-0.913075	7.08076e-12	0.354094	0.00613008
EF0057	-1.90541	3.56968e-55	0.233577	0.059826	-0.122565	0.382888	-0.913075	7.08076e-12	0.354094	0.00613008
EF0057	-1.90541	3.56968e-55	0.233577	0.059826	-0.122565	0.382888	-0.913075	7.08076e-12	0.354094	0.00613008
EF0058	0.422414	7.26604e-05	0.123285	0.19265	0.353458	0.00173039	0.154749	0.0822907	0.0161237	0.852931
EF0059	0.234287	0.01319	0.351733	0.000105904	0.384047	0.000342152	0.100398	0.159998	0.0724703	0.333613
EF0062	-0.202525	0.0308575	-0.406262	1.10352e-06	-0.113862	0.277013	0.20083	0.0102599	-0.307003	0.000195211
EF0064			-0.659557	0.0252835	-0.13056	0.763852	-0.0400682	1	-0.608188	0.0863164
EF0065	0.17816	0.702065	-0.876852	0.000682525	-0.760682	0.00415409	0.349696	0.131779	-0.385441	0.03361
EF0066	1.16301	3.11963e-10	0.292628	0.0228372	-0.485871	0.00137765	0.630211	0.000128759	1.03974	5.93996e-12
EF0067	0.1443	0.0569313	0.643488	2.89606e-21	-0.0726313	0.426349	-0.618988	4.41315e-13	0.732913	3.69784e-17
EF0068	0.183022	0.2501	-0.0339047	0.803043	-0.00881852	0.969093	-0.506559	0.00138444	0.460875	0.00549472
EF0068	0.183022	0.2501	-0.0339047	0.803043	-0.00881852	0.969093	-0.506559	0.00138444	0.460875	0.00549472
EF0068	0.183022	0.2501	-0.0339047	0.803043	-0.00881852	0.969093	-0.506559	0.00138444	0.460875	0.00549472
EF0068	0.183022	0.2501	-0.0339047	0.803043	-0.00881852	0.969093	-0.506559	0.00138444	0.460875	0.00549472
EF0069	-0.474974	0.000153065	-0.0920261	0.450651	-0.35851	0.00256601	-0.295881	0.00662749	0.265231	0.00896549
EF0069	-0.474974	0.000153065	-0.0920261	0.450651	-0.35851	0.00256601	-0.295881	0.00662749	0.265231	0.00896549
EF0069	-0.474974	0.000153065	-0.0920261	0.450651	-0.35851	0.00256601	-0.295881	0.00662749	0.265231	0.00896549
EF0069	-0.474974	0.000153065	-0.0920261	0.450651	-0.35851	0.00256601	-0.295881	0.00662749	0.265231	0.00896549
EF0071	-1.03482	1.21881e-24	0.780424	6.5966e-28	-0.304288	0.00140086	-0.787059	1.98612e-16	0.257652	0.00621978
EF0073			0.0465661	1	-0.576349	0.105339	0.520738	0.136064	0.575955	0.0805361
EF0073			0.0465661	1	-0.576349	0.105339	0.520738	0.136064	0.575955	0.0805361
EF0073			0.0465661	1	-0.576349	0.105339	0.520738	0.136064	0.575955	0.0805361
EF0073			0.0465661	1	-0.576349	0.105339	0.520738	0.136064	0.575955	0.0805361
EF0073			0.0465661	1	-0.576349	0.105339	0.520738	0.136064	0.575955	0.0805361
EF0073			0.0465661	1	-0.576349	0.105339	0.520738	0.136064	0.575955	0.0805361
EF0073			0.0465661	1	-0.576349	0.105339	0.520738	0.136064	0.575955	0.0805361
EF0073			0.0465661	1	-0.576349	0.105339	0.520738	0.136064	0.575955	0.0805361
EF0073			0.0465661	1	-0.576349	0.105339	0.520738	0.136064	0.575955	0.0805361
EF0073			0.0465661	1	-0.576349	0.105339	0.520738	0.136064	0.575955	0.0805361
EF0073			0.0465661	1	-0.576349	0.105339	0.520738	0.136064	0.575955	0.0805361
EF0073			0.0465661	1	-0.576349	0.105339	0.520738	0.136064	0.575955	0.0805361
EF0073			0.0465661	1	-0.576349	0.105339	0.520738	0.136064	0.575955	0.0805361
EF0073			0.0465661	1	-0.576349	0.105339	0.520738	0.136064	0.575955	0.0805361
EF0073			0.0465661	1	-0.576349	0.105339	0.520738	0.136064	0.575955	0.0805361
EF0073			0.0465661	1	-0.576349	0.105339	0.520738	0.136064	0.575955	0.0805361
EF0073			0.0465661	1	-0.576349	0.105339	0.520738	0.136064	0.575955	0.0805361
EF0074	0.885719	4.8995e-11	-0.457616	3.81502e-05	-0.104925	0.377259	0.561788	2.57211e-06	-0.183006	0.0928534
EF0074	0.885719	4.8995e-11	-0.457616	3.81502e-05	-0.104925	0.377259	0.561788	2.57211e-06	-0.183006	0.0928534
EF0074	0.885719	4.8995e-11	-0.457616	3.81502e-05	-0.104925	0.377259	0.561788	2.57211e-06	-0.183006	0.0928534
EF0074	0.885719	4.8995e-11	-0.457616	3.81502e-05	-0.104925	0.377259	0.561788	2.57211e-06	-0.183006	0.0928534
EF0074	0.885719	4.8995e-11	-0.457616	3.81502e-05	-0.104925	0.377259	0.561788	2.57211e-06	-0.183006	0.0928534
EF0074	0.885719	4.8995e-11	-0.457616	3.81502e-05	-0.104925	0.377259	0.561788	2.57211e-06	-0.183006	0.0928534
EF0074	0.885719	4.8995e-11	-0.457616	3.81502e-05	-0.104925	0.377259	0.561788	2.57211e-06	-0.183006	0.0928534
EF0074	0.885719	4.8995e-11	-0.457616	3.81502e-05	-0.104925	0.377259	0.561788	2.57211e-06	-0.183006	0.0928534
EF0074	0.885719	4.8995e-11	-0.457616	3.81502e-05	-0.104925	0.377259	0.561788	2.57211e-06	-0.183006	0.0928534
EF0074	0.885719	4.8995e-11	-0.457616	3.81502e-05	-0.104925	0.377259	0.561788	2.57211e-06	-0.183006	0.0928534
EF0074	0.885719	4.8995e-11	-0.457616	3.81502e-05	-0.104925	0.377259	0.561788	2.57211e-06	-0.183006	0.0928534
EF0074	0.885719	4.8995e-11	-0.457616	3.81502e-05	-0.104925	0.377259	0.561788	2.57211e-06	-0.183006	0.0928534
EF0074	0.885719	4.8995e-11	-0.457616	3.81502e-05	-0.104925	0.377259	0.561788	2.57211e-06	-0.183006	0.0928534
EF0074	0.885719	4.8995e-11	-0.457616	3.81502e-05	-0.104925	0.377259	0.561788	2.57211e-06	-0.183006	0.0928534
EF0074	0.885719	4.8995e-11	-0.457616	3.81502e-05	-0.104925	0.377259	0.561788	2.57211e-06	-0.183006	0.0928534
EF0074	0.885719	4.8995e-11	-0.457616	3.81502e-05	-0.104925	0.377259	0.561788	2.57211e-06	-0.183006	0.0928534
EF0076	-0.900862	1.30494e-06	-0.531924	0.00301185	0.119235	0.53018	-0.166232	0.114304	-0.767766	5.33435e-21
EF0076	-0.900862	1.30494e-06	-0.531924	0.00301185	0.119235	0.53018	-0.166232	0.114304	-0.767766	5.33435e-21
EF0076	-0.900862	1.30494e-06	-0.531924	0.00301185	0.119235	0.53018	-0.166232	0.114304	-0.767766	5.33435e-21
EF0076	-0.900862	1.30494e-06	-0.531924	0.00301185	0.119235	0.53018	-0.166232	0.114304	-0.767766	5.33435e-21
EF0076	-0.900862	1.30494e-06	-0.531924	0.00301185	0.119235	0.53018	-0.166232	0.114304	-0.767766	5.33435e-21
EF0076	-0.900862	1.30494e-06	-0.531924	0.00301185	0.119235	0.53018	-0.166232	0.114304	-0.767766	5.33435e-21
EF0076	-0.900862	1.30494e-06	-0.531924	0.00301185	0.119235	0.53018	-0.166232	0.114304	-0.767766	5.33435e-21
EF0076	-0.900862	1.30494e-06	-0.531924	0.00301185	0.119235	0.53018	-0.166232	0.114304	-0.767766	5.33435e-21
EF0076	-0.900862	1.30494e-06	-0.531924	0.00301185	0.119235	0.53018	-0.166232	0.114304	-0.767766	5.33435e-21
EF0076	-0.900862	1.30494e-06	-0.531924	0.00301185	0.119235	0.53018	-0.166232	0.114304	-0.767766	5.33435e-21
EF0076	-0.900862	1.30494e-06	-0.531924	0.00301185	0.119235	0.53018	-0.166232	0.114304	-0.767766	5.33435e-21
EF0076	-0.900862	1.30494e-06	-0.531924	0.00301185	0.119235	0.53018	-0.166232	0.114304	-0.767766	5.33435e-21
EF0076	-0.900862	1.30494e-06	-0.531924	0.00301185	0.119235	0.53018	-0.166232	0.114304	-0.767766	5.33435e-21
EF0076	-0.900862	1.30494e-06	-0.531924	0.00301185	0.119235	0.53018	-0.166232	0.114304	-0.767766	5.33435e-21
EF0076	-0.900862	1.30494e-06	-0.531924	0.00301185	0.119235	0.53018	-0.166232	0.114304	-0.767766	5.33435e-21
EF0076	-0.900862	1.30494e-06	-0.531924	0.00301185	0.119235	0.53018	-0.166232	0.114304	-0.767766	5.33435e-21
EF0077	-1.04858	7.94232e-09	-0.949629	1.52902e-07	-0.0343123	0.855823	-0.376579	0.000267744	-1.1248	5.71316e-39
EF0077	-1.04858	7.94232e-09	-0.949629	1.52902e-07	-0.0343123	0.855823	-0.376579	0.000267744	-1.1248	5.71316e-39
EF0077	-1.04858	7.94232e-09	-0.949629	1.52902e-07	-0.0343123	0.855823	-0.376579	0.000267744	-1.1248	5.71316e-39
EF0077	-1.04858	7.94232e-09	-0.949629	1.52902e-07	-0.0343123	0.855823	-0.376579	0.000267744	-1.1248	5.71316e-39
EF0077	-1.04858	7.94232e-09	-0.949629	1.52902e-07	-0.0343123	0.855823	-0.376579	0.000267744	-1.1248	5.71316e-39
EF0077	-1.04858	7.94232e-09	-0.949629	1.52902e-07	-0.0343123	0.855823	-0.376579	0.000267744	-1.1248	5.71316e-39
EF0077	-1.04858	7.94232e-09	-0.949629	1.52902e-07	-0.0343123	0.855823	-0.376579	0.000267744	-1.1248	5.71316e-39
EF0077	-1.04858	7.94232e-09	-0.949629	1.52902e-07	-0.0343123	0.855823	-0.376579	0.000267744	-1.1248	5.71316e-39
EF0077	-1.04858	7.94232e-09	-0.949629	1.52902e-07	-0.0343123	0.855823	-0.376579	0.000267744	-1.1248	5.71316e-39
EF0077	-1.04858	7.94232e-09	-0.949629	1.52902e-07	-0.0343123	0.855823	-0.376579	0.000267744	-1.1248	5.71316e-39
EF0077	-1.04858	7.94232e-09	-0.949629	1.52902e-07	-0.0343123	0.855823	-0.376579	0.000267744	-1.1248	5.71316e-39
EF0077	-1.04858	7.94232e-09	-0.949629	1.52902e-07	-0.0343123	0.855823	-0.376579	0.000267744	-1.1248	5.71316e-39
EF0077	-1.04858	7.94232e-09	-0.949629	1.52902e-07	-0.0343123	0.855823	-0.376579	0.000267744	-1.1248	5.71316e-39
EF0077	-1.04858	7.94232e-09	-0.949629	1.52902e-07	-0.0343123	0.855823	-0.376579	0.000267744	-1.1248	5.71316e-39
EF0077	-1.04858	7.94232e-09	-0.949629	1.52902e-07	-0.0343123	0.855823	-0.376579	0.000267744	-1.1248	5.71316e-39
EF0077	-1.04858	7.94232e-09	-0.949629	1.52902e-07	-0.0343123	0.855823	-0.376579	0.000267744	-1.1248	5.71316e-39
EF0078	-1.11366	4.52213e-09	-1.01841	3.23207e-10	0.0325127	0.75019	-0.419107	2.65606e-07	-1.16008	3.94086e-42
EF0078	-1.11366	4.52213e-09	-1.01841	3.23207e-10	0.0325127	0.75019	-0.419107	2.65606e-07	-1.16008	3.94086e-42
EF0078	-1.11366	4.52213e-09	-1.01841	3.23207e-10	0.0325127	0.75019	-0.419107	2.65606e-07	-1.16008	3.94086e-42
EF0078	-1.11366	4.52213e-09	-1.01841	3.23207e-10	0.0325127	0.75019	-0.419107	2.65606e-07	-1.16008	3.94086e-42
EF0078	-1.11366	4.52213e-09	-1.01841	3.23207e-10	0.0325127	0.75019	-0.419107	2.65606e-07	-1.16008	3.94086e-42
EF0078	-1.11366	4.52213e-09	-1.01841	3.23207e-10	0.0325127	0.75019	-0.419107	2.65606e-07	-1.16008	3.94086e-42
EF0078	-1.11366	4.52213e-09	-1.01841	3.23207e-10	0.0325127	0.75019	-0.419107	2.65606e-07	-1.16008	3.94086e-42
EF0078	-1.11366	4.52213e-09	-1.01841	3.23207e-10	0.0325127	0.75019	-0.419107	2.65606e-07	-1.16008	3.94086e-42
EF0078	-1.11366	4.52213e-09	-1.01841	3.23207e-10	0.0325127	0.75019	-0.419107	2.65606e-07	-1.16008	3.94086e-42
EF0078	-1.11366	4.52213e-09	-1.01841	3.23207e-10	0.0325127	0.75019	-0.419107	2.65606e-07	-1.16008	3.94086e-42
EF0078	-1.11366	4.52213e-09	-1.01841	3.23207e-10	0.0325127	0.75019	-0.419107	2.65606e-07	-1.16008	3.94086e-42
EF0078	-1.11366	4.52213e-09	-1.01841	3.23207e-10	0.0325127	0.75019	-0.419107	2.65606e-07	-1.16008	3.94086e-42
EF0078	-1.11366	4.52213e-09	-1.01841	3.23207e-10	0.0325127	0.75019	-0.419107	2.65606e-07	-1.16008	3.94086e-42
EF0078	-1.11366	4.52213e-09	-1.01841	3.23207e-10	0.0325127	0.75019	-0.419107	2.65606e-07	-1.16008	3.94086e-42
EF0078	-1.11366	4.52213e-09	-1.01841	3.23207e-10	0.0325127	0.75019	-0.419107	2.65606e-07	-1.16008	3.94086e-42
EF0078	-1.11366	4.52213e-09	-1.01841	3.23207e-10	0.0325127	0.75019	-0.419107	2.65606e-07	-1.16008	3.94086e-42
EF0079	-1.18544	1.8212e-09	-1.1306	4.36696e-10	-0.119153	0.527311	-0.434588	0.000179288	-1.22496	8.93161e-41
EF0079	-1.18544	1.8212e-09	-1.1306	4.36696e-10	-0.119153	0.527311	-0.434588	0.000179288	-1.22496	8.93161e-41
EF0079	-1.18544	1.8212e-09	-1.1306	4.36696e-10	-0.119153	0.527311	-0.434588	0.000179288	-1.22496	8.93161e-41
EF0079	-1.18544	1.8212e-09	-1.1306	4.36696e-10	-0.119153	0.527311	-0.434588	0.000179288	-1.22496	8.93161e-41
EF0079	-1.18544	1.8212e-09	-1.1306	4.36696e-10	-0.119153	0.527311	-0.434588	0.000179288	-1.22496	8.93161e-41
EF0079	-1.18544	1.8212e-09	-1.1306	4.36696e-10	-0.119153	0.527311	-0.434588	0.000179288	-1.22496	8.93161e-41
EF0079	-1.18544	1.8212e-09	-1.1306	4.36696e-10	-0.119153	0.527311	-0.434588	0.000179288	-1.22496	8.93161e-41
EF0079	-1.18544	1.8212e-09	-1.1306	4.36696e-10	-0.119153	0.527311	-0.434588	0.000179288	-1.22496	8.93161e-41
EF0079	-1.18544	1.8212e-09	-1.1306	4.36696e-10	-0.119153	0.527311	-0.434588	0.000179288	-1.22496	8.93161e-41
EF0079	-1.18544	1.8212e-09	-1.1306	4.36696e-10	-0.119153	0.527311	-0.434588	0.000179288	-1.22496	8.93161e-41
EF0079	-1.18544	1.8212e-09	-1.1306	4.36696e-10	-0.119153	0.527311	-0.434588	0.000179288	-1.22496	8.93161e-41
EF0079	-1.18544	1.8212e-09	-1.1306	4.36696e-10	-0.119153	0.527311	-0.434588	0.000179288	-1.22496	8.93161e-41
EF0079	-1.18544	1.8212e-09	-1.1306	4.36696e-10	-0.119153	0.527311	-0.434588	0.000179288	-1.22496	8.93161e-41
EF0079	-1.18544	1.8212e-09	-1.1306	4.36696e-10	-0.119153	0.527311	-0.434588	0.000179288	-1.22496	8.93161e-41
EF0079	-1.18544	1.8212e-09	-1.1306	4.36696e-10	-0.119153	0.527311	-0.434588	0.000179288	-1.22496	8.93161e-41
EF0079	-1.18544	1.8212e-09	-1.1306	4.36696e-10	-0.119153	0.527311	-0.434588	0.000179288	-1.22496	8.93161e-41
EF0080	-1.08731	2.46235e-08	-0.91807	2.25883e-06	0.0181678	0.922863	-0.622573	1.43859e-08	-1.15756	4.62727e-35
EF0081	-1.13017	2.52166e-09	-0.925496	3.95434e-07	0.0549714	0.756724	-0.928709	5.81046e-19	-1.19589	5.1251e-52
EF0082	-0.4342	1.45608e-06	1.14424	4.9896e-42	0.193426	0.0456636	-0.895972	1.12944e-25	0.763836	6.36102e-28
EF0083	-0.903317	1.23815e-20	1.17859	4.01024e-54	0.131299	0.115135	-1.04796	1.17219e-39	0.903071	6.88112e-25
EF0085	0.983491	1.98865e-06	-1.95977	3.61036e-62	-0.3797	0.0155175	0.0450385	0.786343	-0.924963	1.71973e-11
EF0086	1.12862	0.000647782	-1.28656	8.20303e-10	-0.539186	0.0373151	0.950391	0.000314492	-0.339792	0.0942728
EF0089	0.0990235	0.310487	-0.771053	5.57194e-29	-0.187679	0.128649	0.202912	0.112973	-0.495628	4.99621e-05
EF0090	-0.341012	0.035701	0.312386	7.56757e-05	0.0278119	0.805983	0.438625	4.78763e-09	0.20615	0.00620061
EF0091	-0.757661	7.12442e-06	-0.338548	0.0343734	-0.178619	0.274639	-0.310564	0.00115332	-0.178276	0.0234321
EF0093	0.725413	3.40528e-05	-0.27374	0.017568	0.331209	0.0175225	0.521293	0.0018209	-0.347875	0.0161833
EF0094	0.196707	0.0284038	1.2129	4.94693e-74	0.203767	0.00809077	0.0175956	0.849348	1.16851	1.3704e-43
EF0095	-0.562676	2.79036e-16	0.019128	0.751664	-0.0263642	0.739821	0.194372	0.0293078	-0.292643	0.000171744
EF0096	1.06364	1.26565e-08	0.672845	1.01058e-05	0.35799	0.0225343	0.66094	4.77225e-05	1.09155	1.65775e-13
EF0097	-0.69818	5.81932e-14	0.844947	7.0167e-22	4.23944	0	-0.214023	0.10879	4.29846	4.98347e-91
EF0098	-0.84057	6.64729e-19	0.992965	4.32529e-57	3.75281	6.08251e-301	-0.181801	0.209945	5.35922	3.8351e-91
EF0099	-0.779194	1.22072e-32	1.16182	1.17462e-78	3.4797	2.02772e-280	-0.352139	0.00852567	3.41415	1.69965e-70
EF0101	0.192458	0.0175258	-1.13348	4.33078e-69	0.218947	0.00843246	-0.318006	0.000460869	-1.19288	2.30443e-51
EF0102	0.835772	6.38083e-23	-0.425639	4.22699e-11	-0.0560864	0.498365	0.640763	4.52462e-13	0.0339808	0.667093
EF0102	0.835772	6.38083e-23	-0.425639	4.22699e-11	-0.0560864	0.498365	0.640763	4.52462e-13	0.0339808	0.667093
EF0102	0.835772	6.38083e-23	-0.425639	4.22699e-11	-0.0560864	0.498365	0.640763	4.52462e-13	0.0339808	0.667093
EF0102	0.835772	6.38083e-23	-0.425639	4.22699e-11	-0.0560864	0.498365	0.640763	4.52462e-13	0.0339808	0.667093
EF0102	0.835772	6.38083e-23	-0.425639	4.22699e-11	-0.0560864	0.498365	0.640763	4.52462e-13	0.0339808	0.667093
EF0102	0.835772	6.38083e-23	-0.425639	4.22699e-11	-0.0560864	0.498365	0.640763	4.52462e-13	0.0339808	0.667093
EF0103	0.580376	0.000570151	-1.76618	2.69916e-67	-0.128847	0.403082	0.983522	6.84665e-08	-1.11181	3.65283e-21
EF0103	0.580376	0.000570151	-1.76618	2.69916e-67	-0.128847	0.403082	0.983522	6.84665e-08	-1.11181	3.65283e-21
EF0103	0.580376	0.000570151	-1.76618	2.69916e-67	-0.128847	0.403082	0.983522	6.84665e-08	-1.11181	3.65283e-21
EF0103	0.580376	0.000570151	-1.76618	2.69916e-67	-0.128847	0.403082	0.983522	6.84665e-08	-1.11181	3.65283e-21
EF0103	0.580376	0.000570151	-1.76618	2.69916e-67	-0.128847	0.403082	0.983522	6.84665e-08	-1.11181	3.65283e-21
EF0103	0.580376	0.000570151	-1.76618	2.69916e-67	-0.128847	0.403082	0.983522	6.84665e-08	-1.11181	3.65283e-21
EF0104	-0.767434	1.652e-18	0.0501355	0.537305	2.16128	6.54724e-161	-0.402311	1.55993e-05	-1.21351	6.39012e-56
EF0104	-0.767434	1.652e-18	0.0501355	0.537305	2.16128	6.54724e-161	-0.402311	1.55993e-05	-1.21351	6.39012e-56
EF0104	-0.767434	1.652e-18	0.0501355	0.537305	2.16128	6.54724e-161	-0.402311	1.55993e-05	-1.21351	6.39012e-56
EF0104	-0.767434	1.652e-18	0.0501355	0.537305	2.16128	6.54724e-161	-0.402311	1.55993e-05	-1.21351	6.39012e-56
EF0104	-0.767434	1.652e-18	0.0501355	0.537305	2.16128	6.54724e-161	-0.402311	1.55993e-05	-1.21351	6.39012e-56
EF0105	-0.967862	5.09523e-26	0.138522	0.098952	2.92408	1.36398e-256	-1.22775	4.37852e-34	-1.44848	1.32284e-60
EF0105	-0.967862	5.09523e-26	0.138522	0.098952	2.92408	1.36398e-256	-1.22775	4.37852e-34	-1.44848	1.32284e-60
EF0105	-0.967862	5.09523e-26	0.138522	0.098952	2.92408	1.36398e-256	-1.22775	4.37852e-34	-1.44848	1.32284e-60
EF0105	-0.967862	5.09523e-26	0.138522	0.098952	2.92408	1.36398e-256	-1.22775	4.37852e-34	-1.44848	1.32284e-60
EF0105	-0.967862	5.09523e-26	0.138522	0.098952	2.92408	1.36398e-256	-1.22775	4.37852e-34	-1.44848	1.32284e-60
EF0106	-0.945716	4.19683e-26	0.344406	6.68496e-11	3.19046	1.10863e-306	-1.37292	2.05906e-33	-1.23918	2.50166e-34
EF0107	-1.06772	4.56679e-48	0.23385	0.000617363	2.98618	9.72754e-136	-1.15827	3.61747e-16	-0.84887	4.69146e-10
EF0108	-1.06078	2.93905e-30	0.342862	2.18011e-09	3.1324	9.3362e-282	-1.21277	1.01967e-33	-1.02558	4.21723e-28
EF0109	-0.279223	0.00978996	-0.666293	3.74389e-15	-0.0992552	0.335329	-0.00429668	0.972291	-0.37672	1.45152e-05
EF0110	-0.0262561	0.858309	-0.338959	0.00269989	-0.158854	0.236519	0.570174	0.000145622	-0.196612	0.126157
EF0111	-0.0512465	0.676922	-0.163519	0.108133	-0.15537	0.191073	-0.114756	0.329982	-0.145111	0.143554
EF0114	-1.53822	1.7574e-88	0.220591	0.00314166	-0.471725	2.81772e-07	-0.922728	3.15164e-27	0.378773	1.66719e-05
EF0114	-1.53822	1.7574e-88	0.220591	0.00314166	-0.471725	2.81772e-07	-0.922728	3.15164e-27	0.378773	1.66719e-05
EF0114	-1.53822	1.7574e-88	0.220591	0.00314166	-0.471725	2.81772e-07	-0.922728	3.15164e-27	0.378773	1.66719e-05
EF0114	-1.53822	1.7574e-88	0.220591	0.00314166	-0.471725	2.81772e-07	-0.922728	3.15164e-27	0.378773	1.66719e-05
EF0114	-1.53822	1.7574e-88	0.220591	0.00314166	-0.471725	2.81772e-07	-0.922728	3.15164e-27	0.378773	1.66719e-05
EF0115	-0.893524	4.21277e-24	0.852461	6.30722e-23	0.192328	0.0756277	-0.717592	5.96333e-12	0.532548	7.75474e-06
EF0116	-0.531092	8.51954e-06	-0.495325	5.26464e-07	-0.377607	0.00143989	-0.3653	0.00135377	-0.216853	0.0394852
EF0117	-0.0671608	0.531892	-0.303308	0.000317269	-0.256628	0.0143678	0.0773498	0.423271	-0.150168	0.0932265
EF0118	-0.0373201	0.836652	0.695017	1.98338e-05	0.562009	0.00200159	-0.687343	0.00240261	-0.0465162	0.837866
EF0118	-0.0373201	0.836652	0.695017	1.98338e-05	0.562009	0.00200159	-0.687343	0.00240261	-0.0465162	0.837866
EF0118	-0.0373201	0.836652	0.695017	1.98338e-05	0.562009	0.00200159	-0.687343	0.00240261	-0.0465162	0.837866
EF0118	-0.0373201	0.836652	0.695017	1.98338e-05	0.562009	0.00200159	-0.687343	0.00240261	-0.0465162	0.837866
EF0119	-0.0423706	0.828766	0.588763	0.000369897	0.558601	0.00359693	-0.288137	0.301117	0.0944357	0.617
EF0120	0.233424	0.0734112	-0.388853	1.63775e-06	0.0796504	0.443481	-0.180402	0.081696	-0.425061	7.77237e-06
EF0121	-0.360999	0.0346149	-0.186095	0.200845	-0.0104417	0.972178	-0.12295	0.495554	-0.296359	0.0801924
EF0123	0.284096	0.141956	0.816704	1.38529e-07	0.152412	0.329739	0.892438	6.83084e-06	0.286489	0.110603
EF0124	-0.325676	0.0224663	-0.290837	0.0110365	0.000923229	1	-0.0863688	0.619397	-0.089186	0.528901
EF0124	-0.325676	0.0224663	-0.290837	0.0110365	0.000923229	1	-0.0863688	0.619397	-0.089186	0.528901
EF0124	-0.325676	0.0224663	-0.290837	0.0110365	0.000923229	1	-0.0863688	0.619397	-0.089186	0.528901
EF0124	-0.325676	0.0224663	-0.290837	0.0110365	0.000923229	1	-0.0863688	0.619397	-0.089186	0.528901
EF0124	-0.325676	0.0224663	-0.290837	0.0110365	0.000923229	1	-0.0863688	0.619397	-0.089186	0.528901
EF0124	-0.325676	0.0224663	-0.290837	0.0110365	0.000923229	1	-0.0863688	0.619397	-0.089186	0.528901
EF0167	0.0356868	0.856005	-0.213316	0.235847	0.136766	0.479722	-0.202951	0.0652483	-0.250957	0.00295415
EF0168	0.378709	4.47779e-07	-1.64763	2.29794e-81	-0.16013	0.047778	0.225536	0.00810447	-1.19956	4.52081e-53
EF0169	-0.393477	2.70437e-05	0.339311	6.41295e-09	0.206141	0.0435724	0.251505	0.00103183	-0.0199967	0.78253
EF0170	-0.590122	1.57281e-10	0.000115215	1	0.118371	0.233363	-0.0128748	0.863322	-0.216826	0.0022057
EF0171	0.146818	0.290292	-0.396675	2.26396e-05	-0.226307	0.0555291	0.0190689	0.874804	-0.171618	0.12424
EF0172	0.39191	1.38912e-06	1.70059	1.25329e-132	0.209964	0.0153518	0.281862	0.00167356	1.4916	8.75097e-63
EF0173	-0.0437711	0.628202	1.14977	1.07858e-41	-0.17228	0.0933871	-0.0293708	0.715385	1.31905	1.24222e-62
EF0174	-0.179896	0.0716876	1.55493	6.29866e-102	-0.0243235	0.8589	-0.214273	0.0803567	1.6395	4.56287e-37
EF0175	-0.183532	0.0901854	1.51043	1.92733e-70	-0.0205844	0.874314	-0.201703	0.145113	1.61526	2.63625e-33
EF0176	-0.171124	0.0401891	1.01138	4.30073e-41	-0.31616	0.000725533	-0.182607	0.0250128	1.52506	1.99106e-79
EF0177	-0.214533	0.242443	1.53393	1.44757e-18	-0.0586833	0.7592	-0.260144	0.0155571	1.69705	2.03018e-81
EF0178	0.00839944	0.925154	1.26129	2.40162e-51	-0.0399629	0.726499	-0.15668	0.0935349	1.30225	7.63863e-65
EF0179	-0.00518335	0.953996	0.912288	5.68664e-29	0.145398	0.158144	-0.194394	0.0117928	0.859581	1.39846e-28
EF0180	-0.0117845	0.913063	0.774894	3.76351e-20	0.175405	0.250749	-0.145371	0.0905346	0.712957	1.25764e-21
EF0185	-0.790966	5.20064e-05	0.39102	0.0328346	-0.142478	0.456711	-0.694193	2.19279e-11	0.281001	0.000329329
EF0186	-1.09407	6.78219e-09	0.119532	0.492825	-0.18392	0.312685	-0.9929	1.92746e-22	0.0460748	0.545149
EF0187	-1.1086	2.39941e-10	0.00137368	0.99342	-0.213271	0.207288	-1.14844	1.35701e-31	0.0453084	0.538912
EF0188	0.309232	0.255261	-6.83893	0	-7.27032	0	0.575474	1.86422e-15	0.632764	5.29727e-17
EF0188	0.309232	0.255261	-6.83893	0	-7.27032	0	0.575474	1.86422e-15	0.632764	5.29727e-17
EF0188	0.309232	0.255261	-6.83893	0	-7.27032	0	0.575474	1.86422e-15	0.632764	5.29727e-17
EF0188	0.309232	0.255261	-6.83893	0	-7.27032	0	0.575474	1.86422e-15	0.632764	5.29727e-17
EF0188	0.309232	0.255261	-6.83893	0	-7.27032	0	0.575474	1.86422e-15	0.632764	5.29727e-17
EF0188	0.309232	0.255261	-6.83893	0	-7.27032	0	0.575474	1.86422e-15	0.632764	5.29727e-17
EF0188	0.309232	0.255261	-6.83893	0	-7.27032	0	0.575474	1.86422e-15	0.632764	5.29727e-17
EF0188	0.309232	0.255261	-6.83893	0	-7.27032	0	0.575474	1.86422e-15	0.632764	5.29727e-17
EF0188	0.309232	0.255261	-6.83893	0	-7.27032	0	0.575474	1.86422e-15	0.632764	5.29727e-17
EF0188	0.309232	0.255261	-6.83893	0	-7.27032	0	0.575474	1.86422e-15	0.632764	5.29727e-17
EF0188	0.309232	0.255261	-6.83893	0	-7.27032	0	0.575474	1.86422e-15	0.632764	5.29727e-17
EF0188	0.309232	0.255261	-6.83893	0	-7.27032	0	0.575474	1.86422e-15	0.632764	5.29727e-17
EF0188	0.309232	0.255261	-6.83893	0	-7.27032	0	0.575474	1.86422e-15	0.632764	5.29727e-17
EF0188	0.309232	0.255261	-6.83893	0	-7.27032	0	0.575474	1.86422e-15	0.632764	5.29727e-17
EF0188	0.309232	0.255261	-6.83893	0	-7.27032	0	0.575474	1.86422e-15	0.632764	5.29727e-17
EF0188	0.309232	0.255261	-6.83893	0	-7.27032	0	0.575474	1.86422e-15	0.632764	5.29727e-17
EF0188	0.309232	0.255261	-6.83893	0	-7.27032	0	0.575474	1.86422e-15	0.632764	5.29727e-17
EF0188	0.309232	0.255261	-6.83893	0	-7.27032	0	0.575474	1.86422e-15	0.632764	5.29727e-17
EF0188	0.309232	0.255261	-6.83893	0	-7.27032	0	0.575474	1.86422e-15	0.632764	5.29727e-17
EF0188	0.309232	0.255261	-6.83893	0	-7.27032	0	0.575474	1.86422e-15	0.632764	5.29727e-17
EF0188	0.309232	0.255261	-6.83893	0	-7.27032	0	0.575474	1.86422e-15	0.632764	5.29727e-17
EF0188	0.309232	0.255261	-6.83893	0	-7.27032	0	0.575474	1.86422e-15	0.632764	5.29727e-17
EF0191			-3.57243	2.01172e-61	-3.31603	8.06201e-38	0.0416292	0.843661	-0.124018	0.377323
EF0191			-3.57243	2.01172e-61	-3.31603	8.06201e-38	0.0416292	0.843661	-0.124018	0.377323
EF0191			-3.57243	2.01172e-61	-3.31603	8.06201e-38	0.0416292	0.843661	-0.124018	0.377323
EF0191			-3.57243	2.01172e-61	-3.31603	8.06201e-38	0.0416292	0.843661	-0.124018	0.377323
EF0191			-3.57243	2.01172e-61	-3.31603	8.06201e-38	0.0416292	0.843661	-0.124018	0.377323
EF0191			-3.57243	2.01172e-61	-3.31603	8.06201e-38	0.0416292	0.843661	-0.124018	0.377323
EF0191			-3.57243	2.01172e-61	-3.31603	8.06201e-38	0.0416292	0.843661	-0.124018	0.377323
EF0191			-3.57243	2.01172e-61	-3.31603	8.06201e-38	0.0416292	0.843661	-0.124018	0.377323
EF0191			-3.57243	2.01172e-61	-3.31603	8.06201e-38	0.0416292	0.843661	-0.124018	0.377323
EF0191			-3.57243	2.01172e-61	-3.31603	8.06201e-38	0.0416292	0.843661	-0.124018	0.377323
EF0191			-3.57243	2.01172e-61	-3.31603	8.06201e-38	0.0416292	0.843661	-0.124018	0.377323
EF0191			-3.57243	2.01172e-61	-3.31603	8.06201e-38	0.0416292	0.843661	-0.124018	0.377323
EF0191			-3.57243	2.01172e-61	-3.31603	8.06201e-38	0.0416292	0.843661	-0.124018	0.377323
EF0191			-3.57243	2.01172e-61	-3.31603	8.06201e-38	0.0416292	0.843661	-0.124018	0.377323
EF0191			-3.57243	2.01172e-61	-3.31603	8.06201e-38	0.0416292	0.843661	-0.124018	0.377323
EF0191			-3.57243	2.01172e-61	-3.31603	8.06201e-38	0.0416292	0.843661	-0.124018	0.377323
EF0191			-3.57243	2.01172e-61	-3.31603	8.06201e-38	0.0416292	0.843661	-0.124018	0.377323
EF0191			-3.57243	2.01172e-61	-3.31603	8.06201e-38	0.0416292	0.843661	-0.124018	0.377323
EF0191			-3.57243	2.01172e-61	-3.31603	8.06201e-38	0.0416292	0.843661	-0.124018	0.377323
EF0191			-3.57243	2.01172e-61	-3.31603	8.06201e-38	0.0416292	0.843661	-0.124018	0.377323
EF0191			-3.57243	2.01172e-61	-3.31603	8.06201e-38	0.0416292	0.843661	-0.124018	0.377323
EF0191			-3.57243	2.01172e-61	-3.31603	8.06201e-38	0.0416292	0.843661	-0.124018	0.377323
EF0192	0.457473	0.0723944	-4.44648	0	-4.09053	7.12343e-143	-0.397919	0.000284211	-0.283379	0.00928587
EF0192	0.457473	0.0723944	-4.44648	0	-4.09053	7.12343e-143	-0.397919	0.000284211	-0.283379	0.00928587
EF0192	0.457473	0.0723944	-4.44648	0	-4.09053	7.12343e-143	-0.397919	0.000284211	-0.283379	0.00928587
EF0192	0.457473	0.0723944	-4.44648	0	-4.09053	7.12343e-143	-0.397919	0.000284211	-0.283379	0.00928587
EF0192	0.457473	0.0723944	-4.44648	0	-4.09053	7.12343e-143	-0.397919	0.000284211	-0.283379	0.00928587
EF0192	0.457473	0.0723944	-4.44648	0	-4.09053	7.12343e-143	-0.397919	0.000284211	-0.283379	0.00928587
EF0192	0.457473	0.0723944	-4.44648	0	-4.09053	7.12343e-143	-0.397919	0.000284211	-0.283379	0.00928587
EF0192	0.457473	0.0723944	-4.44648	0	-4.09053	7.12343e-143	-0.397919	0.000284211	-0.283379	0.00928587
EF0192	0.457473	0.0723944	-4.44648	0	-4.09053	7.12343e-143	-0.397919	0.000284211	-0.283379	0.00928587
EF0192	0.457473	0.0723944	-4.44648	0	-4.09053	7.12343e-143	-0.397919	0.000284211	-0.283379	0.00928587
EF0192	0.457473	0.0723944	-4.44648	0	-4.09053	7.12343e-143	-0.397919	0.000284211	-0.283379	0.00928587
EF0192	0.457473	0.0723944	-4.44648	0	-4.09053	7.12343e-143	-0.397919	0.000284211	-0.283379	0.00928587
EF0192	0.457473	0.0723944	-4.44648	0	-4.09053	7.12343e-143	-0.397919	0.000284211	-0.283379	0.00928587
EF0192	0.457473	0.0723944	-4.44648	0	-4.09053	7.12343e-143	-0.397919	0.000284211	-0.283379	0.00928587
EF0192	0.457473	0.0723944	-4.44648	0	-4.09053	7.12343e-143	-0.397919	0.000284211	-0.283379	0.00928587
EF0192	0.457473	0.0723944	-4.44648	0	-4.09053	7.12343e-143	-0.397919	0.000284211	-0.283379	0.00928587
EF0192	0.457473	0.0723944	-4.44648	0	-4.09053	7.12343e-143	-0.397919	0.000284211	-0.283379	0.00928587
EF0192	0.457473	0.0723944	-4.44648	0	-4.09053	7.12343e-143	-0.397919	0.000284211	-0.283379	0.00928587
EF0192	0.457473	0.0723944	-4.44648	0	-4.09053	7.12343e-143	-0.397919	0.000284211	-0.283379	0.00928587
EF0192	0.457473	0.0723944	-4.44648	0	-4.09053	7.12343e-143	-0.397919	0.000284211	-0.283379	0.00928587
EF0192	0.457473	0.0723944	-4.44648	0	-4.09053	7.12343e-143	-0.397919	0.000284211	-0.283379	0.00928587
EF0192	0.457473	0.0723944	-4.44648	0	-4.09053	7.12343e-143	-0.397919	0.000284211	-0.283379	0.00928587
EF0193	0.37493	0.154548	-4.9397	0	-4.39031	6.44364e-190	-0.229197	0.0154122	-0.518467	1.73553e-08
EF0193	0.37493	0.154548	-4.9397	0	-4.39031	6.44364e-190	-0.229197	0.0154122	-0.518467	1.73553e-08
EF0193	0.37493	0.154548	-4.9397	0	-4.39031	6.44364e-190	-0.229197	0.0154122	-0.518467	1.73553e-08
EF0193	0.37493	0.154548	-4.9397	0	-4.39031	6.44364e-190	-0.229197	0.0154122	-0.518467	1.73553e-08
EF0193	0.37493	0.154548	-4.9397	0	-4.39031	6.44364e-190	-0.229197	0.0154122	-0.518467	1.73553e-08
EF0193	0.37493	0.154548	-4.9397	0	-4.39031	6.44364e-190	-0.229197	0.0154122	-0.518467	1.73553e-08
EF0193	0.37493	0.154548	-4.9397	0	-4.39031	6.44364e-190	-0.229197	0.0154122	-0.518467	1.73553e-08
EF0193	0.37493	0.154548	-4.9397	0	-4.39031	6.44364e-190	-0.229197	0.0154122	-0.518467	1.73553e-08
EF0193	0.37493	0.154548	-4.9397	0	-4.39031	6.44364e-190	-0.229197	0.0154122	-0.518467	1.73553e-08
EF0193	0.37493	0.154548	-4.9397	0	-4.39031	6.44364e-190	-0.229197	0.0154122	-0.518467	1.73553e-08
EF0193	0.37493	0.154548	-4.9397	0	-4.39031	6.44364e-190	-0.229197	0.0154122	-0.518467	1.73553e-08
EF0193	0.37493	0.154548	-4.9397	0	-4.39031	6.44364e-190	-0.229197	0.0154122	-0.518467	1.73553e-08
EF0193	0.37493	0.154548	-4.9397	0	-4.39031	6.44364e-190	-0.229197	0.0154122	-0.518467	1.73553e-08
EF0193	0.37493	0.154548	-4.9397	0	-4.39031	6.44364e-190	-0.229197	0.0154122	-0.518467	1.73553e-08
EF0193	0.37493	0.154548	-4.9397	0	-4.39031	6.44364e-190	-0.229197	0.0154122	-0.518467	1.73553e-08
EF0193	0.37493	0.154548	-4.9397	0	-4.39031	6.44364e-190	-0.229197	0.0154122	-0.518467	1.73553e-08
EF0193	0.37493	0.154548	-4.9397	0	-4.39031	6.44364e-190	-0.229197	0.0154122	-0.518467	1.73553e-08
EF0193	0.37493	0.154548	-4.9397	0	-4.39031	6.44364e-190	-0.229197	0.0154122	-0.518467	1.73553e-08
EF0193	0.37493	0.154548	-4.9397	0	-4.39031	6.44364e-190	-0.229197	0.0154122	-0.518467	1.73553e-08
EF0193	0.37493	0.154548	-4.9397	0	-4.39031	6.44364e-190	-0.229197	0.0154122	-0.518467	1.73553e-08
EF0193	0.37493	0.154548	-4.9397	0	-4.39031	6.44364e-190	-0.229197	0.0154122	-0.518467	1.73553e-08
EF0193	0.37493	0.154548	-4.9397	0	-4.39031	6.44364e-190	-0.229197	0.0154122	-0.518467	1.73553e-08
EF0194	-0.513485	0.00683665	-0.0728016	0.696019	0.124467	0.511696	-0.227692	0.0313822	-0.199547	0.0160475
EF0195	-0.155832	0.397154	1.43372	3.55515e-15	-0.142722	0.446382	-0.093564	0.388111	1.50416	1.80888e-73
EF0196	0.0783023	0.353083	0.272016	9.09434e-05	0.1194	0.132032	-0.349779	8.55082e-06	0.21976	0.00475121
EF0197	0.374647	0.000109195	0.543338	4.73988e-11	0.0406466	0.696786	-0.126729	0.211267	0.542731	8.72197e-09
EF0198	-0.0625293	0.746023	1.02297	5.71311e-08	-0.24886	0.199342	0.260483	0.0181227	1.06871	3.7559e-35
EF0199	-0.0918894	0.626328	1.02766	3.27306e-08	-0.265905	0.164485	0.258992	0.0198139	1.10998	2.03342e-38
EF0200	-0.0948575	0.642256	1.12632	2.18011e-08	-0.23508	0.246784	0.303972	0.0155978	1.24733	7.25652e-41
EF0201	-0.0722743	0.725835	0.696327	0.000421785	-0.00220765	0.991212	0.0433315	0.711882	0.60163	4.50796e-12
EF0202	0.422124	4.78681e-06	0.483941	2.68127e-11	0.107292	0.216543	-0.954952	1.48514e-26	0.795008	6.67188e-14
EF0202	0.422124	4.78681e-06	0.483941	2.68127e-11	0.107292	0.216543	-0.954952	1.48514e-26	0.795008	6.67188e-14
EF0203	-0.610319	0.000405406	0.155278	0.334694	0.0726971	0.675673	-0.703131	4.46391e-12	-0.0766175	0.350165
EF0203	-0.610319	0.000405406	0.155278	0.334694	0.0726971	0.675673	-0.703131	4.46391e-12	-0.0766175	0.350165
EF0205	0.00326341	0.986289	1.85342	9.43693e-23	0.0754868	0.691123	0.0569546	0.595314	1.45869	4.38741e-69
EF0206	0.129893	0.502517	1.8591	1.57685e-21	0.0173381	0.929216	0.321336	0.00365436	1.47769	2.65522e-64
EF0207	0.0786091	0.678521	1.79307	5.88128e-21	-0.0449995	0.815697	0.280981	0.0108972	1.5566	2.38352e-73
EF0208	0.121475	0.515281	1.8393	8.90251e-23	-0.0776978	0.683902	0.525374	2.20154e-06	1.55013	2.38922e-67
EF0209	0.0186106	0.923567	1.79335	3.47621e-20	-0.159203	0.422084	0.426261	0.000218484	1.64099	2.27775e-70
EF0210	0.0888692	0.638092	1.79532	2.08656e-21	-0.207475	0.289118	0.559917	2.28697e-06	1.66579	1.11421e-59
EF0211	0.125156	0.517351	1.68854	2.19496e-18	-0.188438	0.348788	0.53589	1.17913e-05	1.57604	1.81552e-52
EF0212	0.0643095	0.742272	1.70991	1.66574e-18	-0.186788	0.354442	0.462219	0.00012145	1.5733	9.54571e-56
EF0213	0.00431999	0.982059	1.79518	1.30383e-20	-0.209263	0.298096	0.351001	0.00411882	1.66131	1.57921e-58
EF0214	0.0481127	0.790875	1.80855	5.49893e-20	-0.193815	0.31481	0.354304	0.00256913	1.58807	1.70296e-54
EF0215	0.0403521	0.828176	1.72375	5.06263e-21	-0.21229	0.269862	0.444877	0.000129649	1.61429	2.21771e-62
EF0216	-0.0580351	0.756788	1.71419	4.59543e-20	-0.269424	0.166346	0.209759	0.0863586	1.67795	2.56011e-66
EF0217	-0.033605	0.853874	1.62352	1.11199e-16	-0.297631	0.120383	0.339343	0.00348526	1.654	1.59651e-66
EF0218	-0.110402	0.539431	1.46544	1.8756e-14	-0.374466	0.0436117	0.246511	0.0282619	1.63003	1.45574e-79
EF0219	-0.289379	0.101607	1.40067	1.09587e-17	-0.44399	0.0158724	0.124067	0.245758	1.72104	2.04463e-83
EF0220	-0.0207137	0.907992	1.01801	8.89498e-08	-0.431328	0.0183949	0.400076	0.000153386	1.39591	1.66212e-65
EF0221	-0.00764372	0.967545	1.34729	6.72243e-13	-0.251035	0.18846	0.140242	0.203901	1.46916	1.17714e-63
EF0223	0.030976	0.865213	1.59495	3.77365e-18	-0.0813489	0.661556	0.177339	0.120969	1.52474	7.89771e-67
EF0224	0.0254587	0.89271	1.58892	4.84416e-17	-0.0758435	0.688308	0.0779004	0.495349	1.49585	3.09888e-70
EF0225	0.180189	0.336984	1.50681	1.20108e-16	-0.0659837	0.73081	0.275167	0.00720449	1.41103	1.40211e-72
EF0226	0.0668063	0.727973	1.50494	7.1108e-16	-0.0431425	0.819077	0.255335	0.0173932	1.47257	1.14981e-61
EF0227	0.121048	0.531453	1.49516	1.27777e-14	-0.0371942	0.8507	0.157206	0.158112	1.44328	1.13547e-60
EF0228	-0.0225878	0.900968	2.15642	9.0498e-28	-0.105075	0.570581	0.228405	0.0482744	2.00305	4.57479e-120
EF0229	0.0619346	0.74793	1.81325	1.0509e-21	-0.133463	0.46284	0.331012	0.00126558	1.69924	2.51237e-103
EF0230	0.0881155	0.641405	1.75869	1.17049e-22	-0.0830067	0.660011	0.380061	0.000156315	1.63214	7.2735e-97
EF0231	0.0394218	0.828254	1.80122	4.49702e-20	-0.0923155	0.617324	0.268608	0.0106918	1.69775	6.82489e-98
EF0232	-0.106218	0.555427	1.73764	3.31869e-19	-0.0865337	0.637971	0.157307	0.146791	1.65142	8.46178e-88
EF0233	-0.0495202	0.793615	1.63827	4.18749e-18	-0.066637	0.730876	0.230406	0.0379656	1.55462	5.28572e-69
EF0234	-0.260625	0.162015	1.60065	5.54483e-20	-0.0546621	0.773312	-0.179396	0.141557	1.58671	3.34786e-56
EF0235	0.825504	1.67763e-13	0.407213	3.72629e-08	0.113093	0.206514	0.763235	9.13621e-12	0.496511	3.37373e-08
EF0235	0.825504	1.67763e-13	0.407213	3.72629e-08	0.113093	0.206514	0.763235	9.13621e-12	0.496511	3.37373e-08
EF0236	0.315378	0.00105425	0.983684	6.93265e-55	0.293801	0.000684167	0.275283	0.00294671	0.992043	1.67026e-25
EF0237	0.500286	1.49248e-10	0.0631806	0.309235	-0.0107616	0.90782	0.740106	1.03047e-14	0.250997	0.00491616
EF0238	0.145584	0.0292327	0.17171	0.0388141	0.182633	0.0179909	0.289676	0.000350918	0.13861	0.0628104
EF0239	-0.0358992	0.706038	0.103444	0.215509	0.246353	0.0135688	-0.229917	0.00195689	-0.101009	0.157828
EF0241	0.0773687	0.589891	-1.0904	1.75844e-51	-0.103059	0.235684	0.455508	3.04239e-07	-0.840927	7.38761e-27
EF0243	0.790203	1.50714e-27	-0.847593	5.29735e-22	0.453948	7.87725e-09	0.0818607	0.332128	-1.19573	6.41822e-55
EF0243	0.790203	1.50714e-27	-0.847593	5.29735e-22	0.453948	7.87725e-09	0.0818607	0.332128	-1.19573	6.41822e-55
EF0243	0.790203	1.50714e-27	-0.847593	5.29735e-22	0.453948	7.87725e-09	0.0818607	0.332128	-1.19573	6.41822e-55
EF0243	0.790203	1.50714e-27	-0.847593	5.29735e-22	0.453948	7.87725e-09	0.0818607	0.332128	-1.19573	6.41822e-55
EF0243	0.790203	1.50714e-27	-0.847593	5.29735e-22	0.453948	7.87725e-09	0.0818607	0.332128	-1.19573	6.41822e-55
EF0243	0.790203	1.50714e-27	-0.847593	5.29735e-22	0.453948	7.87725e-09	0.0818607	0.332128	-1.19573	6.41822e-55
EF0243	0.790203	1.50714e-27	-0.847593	5.29735e-22	0.453948	7.87725e-09	0.0818607	0.332128	-1.19573	6.41822e-55
EF0243	0.790203	1.50714e-27	-0.847593	5.29735e-22	0.453948	7.87725e-09	0.0818607	0.332128	-1.19573	6.41822e-55
EF0243	0.790203	1.50714e-27	-0.847593	5.29735e-22	0.453948	7.87725e-09	0.0818607	0.332128	-1.19573	6.41822e-55
EF0243	0.790203	1.50714e-27	-0.847593	5.29735e-22	0.453948	7.87725e-09	0.0818607	0.332128	-1.19573	6.41822e-55
EF0243	0.790203	1.50714e-27	-0.847593	5.29735e-22	0.453948	7.87725e-09	0.0818607	0.332128	-1.19573	6.41822e-55
EF0243	0.790203	1.50714e-27	-0.847593	5.29735e-22	0.453948	7.87725e-09	0.0818607	0.332128	-1.19573	6.41822e-55
EF0243	0.790203	1.50714e-27	-0.847593	5.29735e-22	0.453948	7.87725e-09	0.0818607	0.332128	-1.19573	6.41822e-55
EF0243	0.790203	1.50714e-27	-0.847593	5.29735e-22	0.453948	7.87725e-09	0.0818607	0.332128	-1.19573	6.41822e-55
EF0243	0.790203	1.50714e-27	-0.847593	5.29735e-22	0.453948	7.87725e-09	0.0818607	0.332128	-1.19573	6.41822e-55
EF0243	0.790203	1.50714e-27	-0.847593	5.29735e-22	0.453948	7.87725e-09	0.0818607	0.332128	-1.19573	6.41822e-55
EF0243	0.790203	1.50714e-27	-0.847593	5.29735e-22	0.453948	7.87725e-09	0.0818607	0.332128	-1.19573	6.41822e-55
EF0243	0.790203	1.50714e-27	-0.847593	5.29735e-22	0.453948	7.87725e-09	0.0818607	0.332128	-1.19573	6.41822e-55
EF0243	0.790203	1.50714e-27	-0.847593	5.29735e-22	0.453948	7.87725e-09	0.0818607	0.332128	-1.19573	6.41822e-55
EF0243	0.790203	1.50714e-27	-0.847593	5.29735e-22	0.453948	7.87725e-09	0.0818607	0.332128	-1.19573	6.41822e-55
EF0243	0.790203	1.50714e-27	-0.847593	5.29735e-22	0.453948	7.87725e-09	0.0818607	0.332128	-1.19573	6.41822e-55
EF0243	0.790203	1.50714e-27	-0.847593	5.29735e-22	0.453948	7.87725e-09	0.0818607	0.332128	-1.19573	6.41822e-55
EF0244					-0.830256	0.0135397	0.0192577	1	0.755989	0.0128509
EF0245	0.0823181	0.449358	-0.95867	5.86594e-31	0.379233	0.00807248	-0.42406	0.00212954	-1.13198	5.31726e-19
EF0246	-0.196006	0.0399579	-0.088947	0.286679	0.0738032	0.4509	-0.361892	4.24066e-07	-0.105308	0.148658
EF0247	0.0778587	0.392669	0.492959	7.34614e-09	-0.0925939	0.345663	0.295889	9.59598e-05	0.547594	2.12955e-15
EF0247	0.0778587	0.392669	0.492959	7.34614e-09	-0.0925939	0.345663	0.295889	9.59598e-05	0.547594	2.12955e-15
EF0247	0.0778587	0.392669	0.492959	7.34614e-09	-0.0925939	0.345663	0.295889	9.59598e-05	0.547594	2.12955e-15
EF0247	0.0778587	0.392669	0.492959	7.34614e-09	-0.0925939	0.345663	0.295889	9.59598e-05	0.547594	2.12955e-15
EF0247	0.0778587	0.392669	0.492959	7.34614e-09	-0.0925939	0.345663	0.295889	9.59598e-05	0.547594	2.12955e-15
EF0248	-0.429798	0.0123314	0.212875	0.187596	0.305164	0.0916782	-0.745012	1.16705e-08	0.405334	0.00697497
EF0249	0.2876	0.000220543	-0.25645	5.38778e-05	-0.104234	0.178251	0.630075	3.53508e-13	-0.0478605	0.549099
EF0250	0.069683	0.306461	-0.338279	6.60558e-05	0.111331	0.139181	-0.0359097	0.641046	-0.500385	1.92963e-11
EF0251	-0.214087	0.0196278	-0.193887	0.021244	0.190806	0.0125632	-0.391401	1.46109e-07	-0.474782	1.16953e-10
EF0252	0.503974	0.00313434	-0.652395	0.00027025	0.112248	0.526266	0.598061	5.86365e-10	-0.659411	2.01377e-16
EF0253	-0.487708	0.0304371	0.0736172	0.716539	-0.0851198	0.685054	-0.331087	0.0595855	-0.0961447	0.551217
EF0253	-0.487708	0.0304371	0.0736172	0.716539	-0.0851198	0.685054	-0.331087	0.0595855	-0.0961447	0.551217
EF0255	-0.387425	0.0335632	0.265096	0.140595	-0.495647	0.00740589	-0.0772505	0.473773	0.674732	1.6389e-16
EF0256	-0.409849	5.9326e-05	-0.622968	5.63293e-20	-0.252633	0.00544626	-0.430052	4.57122e-06	-0.403983	3.90853e-06
EF0257	0.106855	0.511603	-0.503319	0.00272576	-0.148101	0.381888	0.0183295	0.844944	-0.391166	2.15438e-07
EF0258	0.00267069	0.976678	-0.611582	2.19127e-14	0.00682216	0.949384	-0.188203	0.0178626	-0.715732	1.08669e-18
EF0259	0.114131	0.15213	-0.39403	5.40126e-09	0.127753	0.109972	-0.386848	2.21546e-06	-0.644121	3.76558e-15
EF0260	0.167801	0.559386	-0.368239	0.0624404	-0.126096	0.608465	0.436481	0.18204	-0.422865	0.02945
EF0261	0.296326	6.52662e-05	-0.620445	2.12945e-12	-0.247814	0.0183281	0.420911	1.42541e-06	-0.244997	0.00262171
EF0262	0.417157	8.7798e-06	-0.483653	1.21562e-08	-0.142942	0.153748	0.364301	8.57728e-07	-0.193599	0.0126861
EF0263	0.574751	6.83663e-17	0.137636	0.12485	0.281034	0.00533854	0.945511	7.72665e-30	0.0210911	0.774809
EF0264	0.465467	1.4958e-08	-0.297191	8.68288e-07	0.109341	0.250509	0.386665	9.01442e-05	-0.132854	0.149697
EF0264	0.465467	1.4958e-08	-0.297191	8.68288e-07	0.109341	0.250509	0.386665	9.01442e-05	-0.132854	0.149697
EF0264	0.465467	1.4958e-08	-0.297191	8.68288e-07	0.109341	0.250509	0.386665	9.01442e-05	-0.132854	0.149697
EF0264	0.465467	1.4958e-08	-0.297191	8.68288e-07	0.109341	0.250509	0.386665	9.01442e-05	-0.132854	0.149697
EF0264	0.465467	1.4958e-08	-0.297191	8.68288e-07	0.109341	0.250509	0.386665	9.01442e-05	-0.132854	0.149697
EF0264	0.465467	1.4958e-08	-0.297191	8.68288e-07	0.109341	0.250509	0.386665	9.01442e-05	-0.132854	0.149697
EF0264	0.465467	1.4958e-08	-0.297191	8.68288e-07	0.109341	0.250509	0.386665	9.01442e-05	-0.132854	0.149697
EF0264	0.465467	1.4958e-08	-0.297191	8.68288e-07	0.109341	0.250509	0.386665	9.01442e-05	-0.132854	0.149697
EF0264	0.465467	1.4958e-08	-0.297191	8.68288e-07	0.109341	0.250509	0.386665	9.01442e-05	-0.132854	0.149697
EF0264	0.465467	1.4958e-08	-0.297191	8.68288e-07	0.109341	0.250509	0.386665	9.01442e-05	-0.132854	0.149697
EF0264	0.465467	1.4958e-08	-0.297191	8.68288e-07	0.109341	0.250509	0.386665	9.01442e-05	-0.132854	0.149697
EF0264	0.465467	1.4958e-08	-0.297191	8.68288e-07	0.109341	0.250509	0.386665	9.01442e-05	-0.132854	0.149697
EF0265	-0.120875	0.510651	0.283116	0.118926	-0.0207122	0.91186	-0.012323	0.908971	0.240735	0.0038163
EF0266	0.352004	3.30891e-06	0.491767	8.37641e-14	-0.119125	0.113429	0.781067	4.46867e-21	0.758511	4.01897e-23
EF0267	-0.0893833	0.348431	0.221609	0.00741762	-0.0576532	0.551669	-0.00867163	0.905454	0.269777	6.67386e-05
EF0268	0.367062	0.0427213	0.288275	0.109031	0.018488	0.920885	0.261588	0.00844584	0.280341	0.000347514
EF0270	-1.53696	3.77875e-46	-0.743602	4.01979e-13	0.163702	0.217755	-1.95218	9.83873e-63	-0.918358	1.51362e-15
EF0270	-1.53696	3.77875e-46	-0.743602	4.01979e-13	0.163702	0.217755	-1.95218	9.83873e-63	-0.918358	1.51362e-15
EF0270	-1.53696	3.77875e-46	-0.743602	4.01979e-13	0.163702	0.217755	-1.95218	9.83873e-63	-0.918358	1.51362e-15
EF0270	-1.53696	3.77875e-46	-0.743602	4.01979e-13	0.163702	0.217755	-1.95218	9.83873e-63	-0.918358	1.51362e-15
EF0273	-0.259247	0.142526	0.405948	0.0365746	-0.176068	0.351005	-0.397195	0.055757	0.812759	2.30803e-05
EF0274	-0.248101	0.00694123	-0.535168	8.54507e-14	-0.148253	0.109717	0.151416	0.168013	-0.1993	0.0265352
EF0275	-0.154936	0.151068	-0.797839	1.78472e-22	-0.0885877	0.391093	0.083253	0.509819	-0.655282	1.05414e-10
EF0277	0.303658	0.00550564	0.872992	6.5193e-22	0.0385033	0.697273	0.792921	2.87257e-13	0.811449	6.08268e-17
EF0278	0.161535	0.216736	0.739087	2.63989e-10	0.0251625	0.852803	0.645251	2.81345e-06	0.721929	6.6092e-10
EF0278	0.161535	0.216736	0.739087	2.63989e-10	0.0251625	0.852803	0.645251	2.81345e-06	0.721929	6.6092e-10
EF0279	-0.0975339	0.43835	0.599937	1.11892e-08	-0.0797171	0.502501	0.420298	0.000518362	0.534624	4.90333e-06
EF0279	-0.0975339	0.43835	0.599937	1.11892e-08	-0.0797171	0.502501	0.420298	0.000518362	0.534624	4.90333e-06
EF0279	-0.0975339	0.43835	0.599937	1.11892e-08	-0.0797171	0.502501	0.420298	0.000518362	0.534624	4.90333e-06
EF0280	-0.297704	3.42219e-05	0.137746	0.0232689	-0.0487808	0.567392	0.0237422	0.781551	0.276895	0.00111154
EF0281	-0.693467	1.23439e-14	0.0293677	0.712658	-0.143131	0.11523	-0.50821	2.41357e-07	0.270511	0.00351056
EF0282	0.468881	0.00566676	-0.605858	0.000671085	0.182612	0.304618	0.498389	5.59824e-07	-0.747854	4.70939e-21
EF0282	0.468881	0.00566676	-0.605858	0.000671085	0.182612	0.304618	0.498389	5.59824e-07	-0.747854	4.70939e-21
EF0282	0.468881	0.00566676	-0.605858	0.000671085	0.182612	0.304618	0.498389	5.59824e-07	-0.747854	4.70939e-21
EF0282	0.468881	0.00566676	-0.605858	0.000671085	0.182612	0.304618	0.498389	5.59824e-07	-0.747854	4.70939e-21
EF0283	0.198288	0.300565	-1.06988	2.69338e-08	0.511123	0.00765379	0.460635	2.0085e-05	-1.72257	9.17262e-81
EF0283	0.198288	0.300565	-1.06988	2.69338e-08	0.511123	0.00765379	0.460635	2.0085e-05	-1.72257	9.17262e-81
EF0283	0.198288	0.300565	-1.06988	2.69338e-08	0.511123	0.00765379	0.460635	2.0085e-05	-1.72257	9.17262e-81
EF0283	0.198288	0.300565	-1.06988	2.69338e-08	0.511123	0.00765379	0.460635	2.0085e-05	-1.72257	9.17262e-81
EF0284	-0.0888008	0.636277	-0.81099	6.94365e-06	0.650918	0.000743986	-0.0131888	0.904916	-1.51032	2.87232e-51
EF0284	-0.0888008	0.636277	-0.81099	6.94365e-06	0.650918	0.000743986	-0.0131888	0.904916	-1.51032	2.87232e-51
EF0284	-0.0888008	0.636277	-0.81099	6.94365e-06	0.650918	0.000743986	-0.0131888	0.904916	-1.51032	2.87232e-51
EF0284	-0.0888008	0.636277	-0.81099	6.94365e-06	0.650918	0.000743986	-0.0131888	0.904916	-1.51032	2.87232e-51
EF0285	0.144789	0.103717	-1.16713	3.17021e-13	0.169528	0.0925488	-0.0211976	0.782998	-1.41786	2.30317e-69
EF0286	-0.100271	0.503747	-0.481508	6.31691e-05	-0.361873	0.00548679	-0.019387	0.864478	0.0510485	0.643563
EF0287	0.103335	0.262038	0.83619	2.41306e-22	-0.0367953	0.708871	0.218295	0.00217953	1.02512	2.42605e-38
EF0288	0.675394	0.0058257	-0.308672	0.193152	1.31043	4.21778e-06	-0.142884	0.44762	-0.739056	0.00154712
EF0289	-0.213756	0.0186163	0.818615	1.07926e-50	1.0117	3.19359e-31	-0.19811	0.0237347	0.053633	0.517821
EF0290	-0.15623	0.135709	0.168542	0.0885186	0.946462	4.42508e-17	-0.553526	1.34413e-10	-0.138845	0.107284
EF0292	-1.49512	1.0353e-11	-0.881971	4.34467e-06	-0.195158	0.331986	-0.967955	1.97322e-07	-0.6737	0.000351511
EF0292	-1.49512	1.0353e-11	-0.881971	4.34467e-06	-0.195158	0.331986	-0.967955	1.97322e-07	-0.6737	0.000351511
EF0292	-1.49512	1.0353e-11	-0.881971	4.34467e-06	-0.195158	0.331986	-0.967955	1.97322e-07	-0.6737	0.000351511
EF0292	-1.49512	1.0353e-11	-0.881971	4.34467e-06	-0.195158	0.331986	-0.967955	1.97322e-07	-0.6737	0.000351511
EF0292	-1.49512	1.0353e-11	-0.881971	4.34467e-06	-0.195158	0.331986	-0.967955	1.97322e-07	-0.6737	0.000351511
EF0292	-1.49512	1.0353e-11	-0.881971	4.34467e-06	-0.195158	0.331986	-0.967955	1.97322e-07	-0.6737	0.000351511
EF0293	0.630585	1.49555e-05	-1.21096	8.1278e-41	-0.145978	0.269832	0.623628	9.31932e-05	-1.05502	9.85064e-23
EF0293	0.630585	1.49555e-05	-1.21096	8.1278e-41	-0.145978	0.269832	0.623628	9.31932e-05	-1.05502	9.85064e-23
EF0293	0.630585	1.49555e-05	-1.21096	8.1278e-41	-0.145978	0.269832	0.623628	9.31932e-05	-1.05502	9.85064e-23
EF0293	0.630585	1.49555e-05	-1.21096	8.1278e-41	-0.145978	0.269832	0.623628	9.31932e-05	-1.05502	9.85064e-23
EF0294	0.270214	0.00605507	1.04445	1.78317e-27	0.42217	0.00165467	-0.300787	0.0106949	0.854051	6.0362e-13
EF0294	0.270214	0.00605507	1.04445	1.78317e-27	0.42217	0.00165467	-0.300787	0.0106949	0.854051	6.0362e-13
EF0294	0.270214	0.00605507	1.04445	1.78317e-27	0.42217	0.00165467	-0.300787	0.0106949	0.854051	6.0362e-13
EF0294	0.270214	0.00605507	1.04445	1.78317e-27	0.42217	0.00165467	-0.300787	0.0106949	0.854051	6.0362e-13
EF0294	0.270214	0.00605507	1.04445	1.78317e-27	0.42217	0.00165467	-0.300787	0.0106949	0.854051	6.0362e-13
EF0294	0.270214	0.00605507	1.04445	1.78317e-27	0.42217	0.00165467	-0.300787	0.0106949	0.854051	6.0362e-13
EF0294	0.270214	0.00605507	1.04445	1.78317e-27	0.42217	0.00165467	-0.300787	0.0106949	0.854051	6.0362e-13
EF0294	0.270214	0.00605507	1.04445	1.78317e-27	0.42217	0.00165467	-0.300787	0.0106949	0.854051	6.0362e-13
EF0294	0.270214	0.00605507	1.04445	1.78317e-27	0.42217	0.00165467	-0.300787	0.0106949	0.854051	6.0362e-13
EF0294	0.270214	0.00605507	1.04445	1.78317e-27	0.42217	0.00165467	-0.300787	0.0106949	0.854051	6.0362e-13
EF0294	0.270214	0.00605507	1.04445	1.78317e-27	0.42217	0.00165467	-0.300787	0.0106949	0.854051	6.0362e-13
EF0294	0.270214	0.00605507	1.04445	1.78317e-27	0.42217	0.00165467	-0.300787	0.0106949	0.854051	6.0362e-13
EF0294	0.270214	0.00605507	1.04445	1.78317e-27	0.42217	0.00165467	-0.300787	0.0106949	0.854051	6.0362e-13
EF0294	0.270214	0.00605507	1.04445	1.78317e-27	0.42217	0.00165467	-0.300787	0.0106949	0.854051	6.0362e-13
EF0294	0.270214	0.00605507	1.04445	1.78317e-27	0.42217	0.00165467	-0.300787	0.0106949	0.854051	6.0362e-13
EF0295	-0.571499	1.24201e-17	0.150905	0.0158282	0.14612	0.129685	-0.939595	3.2155e-23	-0.000275452	0.999709
EF0296	-0.692869	8.50377e-15	0.127271	0.129538	0.214402	0.0571335	-1.29141	5.77237e-46	-0.0964399	0.273273
EF0297	0.468602	0.00966473	-2.60839	5.1754e-159	-0.217111	0.113589	0.558996	0.000159815	-2.68926	6.69831e-149
EF0297	0.468602	0.00966473	-2.60839	5.1754e-159	-0.217111	0.113589	0.558996	0.000159815	-2.68926	6.69831e-149
EF0298	-0.208736	0.00209183	-2.49984	8.22737e-51	0.121182	0.133272	-0.264804	0.00115342	-2.81089	1.39438e-250
EF0298	-0.208736	0.00209183	-2.49984	8.22737e-51	0.121182	0.133272	-0.264804	0.00115342	-2.81089	1.39438e-250
EF0298	-0.208736	0.00209183	-2.49984	8.22737e-51	0.121182	0.133272	-0.264804	0.00115342	-2.81089	1.39438e-250
EF0298	-0.208736	0.00209183	-2.49984	8.22737e-51	0.121182	0.133272	-0.264804	0.00115342	-2.81089	1.39438e-250
EF0299	-0.137848	0.363785	-2.19858	7.83396e-142	0.306084	0.0201734	-0.635414	2.24797e-06	-2.6331	1.05075e-149
EF0299	-0.137848	0.363785	-2.19858	7.83396e-142	0.306084	0.0201734	-0.635414	2.24797e-06	-2.6331	1.05075e-149
EF0300	-0.314692	0.00315997	-0.236541	0.0052261	-0.151075	0.139428	-0.134953	0.206534	0.00565104	0.962718
EF0300	-0.314692	0.00315997	-0.236541	0.0052261	-0.151075	0.139428	-0.134953	0.206534	0.00565104	0.962718
EF0301	0.296437	0.167058	0.0749829	0.740083	-0.107411	0.561011	0.344195	0.0895164	-0.131127	0.407604
EF0302	-0.252371	0.172894	-0.0539146	0.768768	0.268599	0.151986	-0.135876	0.180655	-0.368849	6.03478e-06
EF0357	-0.353993	0.00265931	-1.00182	1.46335e-24	-0.072217	0.54334	0.156293	0.216348	-0.907445	6.01815e-20
EF0357	-0.353993	0.00265931	-1.00182	1.46335e-24	-0.072217	0.54334	0.156293	0.216348	-0.907445	6.01815e-20
EF0357	-0.353993	0.00265931	-1.00182	1.46335e-24	-0.072217	0.54334	0.156293	0.216348	-0.907445	6.01815e-20
EF0357	-0.353993	0.00265931	-1.00182	1.46335e-24	-0.072217	0.54334	0.156293	0.216348	-0.907445	6.01815e-20
EF0357	-0.353993	0.00265931	-1.00182	1.46335e-24	-0.072217	0.54334	0.156293	0.216348	-0.907445	6.01815e-20
EF0357	-0.353993	0.00265931	-1.00182	1.46335e-24	-0.072217	0.54334	0.156293	0.216348	-0.907445	6.01815e-20
EF0357	-0.353993	0.00265931	-1.00182	1.46335e-24	-0.072217	0.54334	0.156293	0.216348	-0.907445	6.01815e-20
EF0357	-0.353993	0.00265931	-1.00182	1.46335e-24	-0.072217	0.54334	0.156293	0.216348	-0.907445	6.01815e-20
EF0357	-0.353993	0.00265931	-1.00182	1.46335e-24	-0.072217	0.54334	0.156293	0.216348	-0.907445	6.01815e-20
EF0357	-0.353993	0.00265931	-1.00182	1.46335e-24	-0.072217	0.54334	0.156293	0.216348	-0.907445	6.01815e-20
EF0358	0.0252811	0.828973	-0.749871	1.81171e-22	0.0433736	0.670386	0.416055	0.000306795	-0.878774	2.41649e-23
EF0358	0.0252811	0.828973	-0.749871	1.81171e-22	0.0433736	0.670386	0.416055	0.000306795	-0.878774	2.41649e-23
EF0358	0.0252811	0.828973	-0.749871	1.81171e-22	0.0433736	0.670386	0.416055	0.000306795	-0.878774	2.41649e-23
EF0358	0.0252811	0.828973	-0.749871	1.81171e-22	0.0433736	0.670386	0.416055	0.000306795	-0.878774	2.41649e-23
EF0358	0.0252811	0.828973	-0.749871	1.81171e-22	0.0433736	0.670386	0.416055	0.000306795	-0.878774	2.41649e-23
EF0358	0.0252811	0.828973	-0.749871	1.81171e-22	0.0433736	0.670386	0.416055	0.000306795	-0.878774	2.41649e-23
EF0358	0.0252811	0.828973	-0.749871	1.81171e-22	0.0433736	0.670386	0.416055	0.000306795	-0.878774	2.41649e-23
EF0358	0.0252811	0.828973	-0.749871	1.81171e-22	0.0433736	0.670386	0.416055	0.000306795	-0.878774	2.41649e-23
EF0358	0.0252811	0.828973	-0.749871	1.81171e-22	0.0433736	0.670386	0.416055	0.000306795	-0.878774	2.41649e-23
EF0358	0.0252811	0.828973	-0.749871	1.81171e-22	0.0433736	0.670386	0.416055	0.000306795	-0.878774	2.41649e-23
EF0361	-1.54744	7.80816e-26	-1.1536	2.60482e-28	-0.645982	7.01137e-07	-0.565374	1.1104e-05	-0.398641	0.000338262
EF0362	-0.635456	3.09408e-06	-0.536004	1.07069e-05	-0.258462	0.0555169	0.0268561	0.891757	-0.312363	0.0118152
EF0362	-0.635456	3.09408e-06	-0.536004	1.07069e-05	-0.258462	0.0555169	0.0268561	0.891757	-0.312363	0.0118152
EF0362	-0.635456	3.09408e-06	-0.536004	1.07069e-05	-0.258462	0.0555169	0.0268561	0.891757	-0.312363	0.0118152
EF0362	-0.635456	3.09408e-06	-0.536004	1.07069e-05	-0.258462	0.0555169	0.0268561	0.891757	-0.312363	0.0118152
EF0362	-0.635456	3.09408e-06	-0.536004	1.07069e-05	-0.258462	0.0555169	0.0268561	0.891757	-0.312363	0.0118152
EF0362	-0.635456	3.09408e-06	-0.536004	1.07069e-05	-0.258462	0.0555169	0.0268561	0.891757	-0.312363	0.0118152
EF0362	-0.635456	3.09408e-06	-0.536004	1.07069e-05	-0.258462	0.0555169	0.0268561	0.891757	-0.312363	0.0118152
EF0362	-0.635456	3.09408e-06	-0.536004	1.07069e-05	-0.258462	0.0555169	0.0268561	0.891757	-0.312363	0.0118152
EF0362	-0.635456	3.09408e-06	-0.536004	1.07069e-05	-0.258462	0.0555169	0.0268561	0.891757	-0.312363	0.0118152
EF0362	-0.635456	3.09408e-06	-0.536004	1.07069e-05	-0.258462	0.0555169	0.0268561	0.891757	-0.312363	0.0118152
EF0365	0.437174	2.26553e-07	0.390613	4.11571e-08	0.10922	0.190471	0.59611	1.31622e-09	0.517464	2.93014e-09
EF0365	0.437174	2.26553e-07	0.390613	4.11571e-08	0.10922	0.190471	0.59611	1.31622e-09	0.517464	2.93014e-09
EF0366	0.297438	0.000230965	0.263499	0.000150965	0.00902469	0.925601	0.204101	0.0208912	0.355545	2.20757e-05
EF0367	0.214377	0.0736633	0.310521	0.000142846	-0.0421048	0.681893	0.112973	0.309646	0.5173	1.77792e-07
EF0368	0.336679	2.28881e-05	-0.709993	7.34517e-16	0.32359	4.81361e-05	0.26765	0.00109359	-0.906937	4.94952e-38
EF0369	1.05611	1.49941e-07	-1.16504	4.5889e-15	-0.39216	0.0162041	0.360732	0.02042	-0.398297	0.00655307
EF0370	0.268051	0.12026	0.257002	0.136956	-0.0324802	0.855337	0.133491	0.166884	0.324954	2.55485e-05
EF0370	0.268051	0.12026	0.257002	0.136956	-0.0324802	0.855337	0.133491	0.166884	0.324954	2.55485e-05
EF0370	0.268051	0.12026	0.257002	0.136956	-0.0324802	0.855337	0.133491	0.166884	0.324954	2.55485e-05
EF0370	0.268051	0.12026	0.257002	0.136956	-0.0324802	0.855337	0.133491	0.166884	0.324954	2.55485e-05
EF0371	0.424301	5.07588e-06	0.693548	2.47297e-16	0.260342	0.00812637	0.438463	2.68082e-06	0.718695	3.82992e-15
EF0371	0.424301	5.07588e-06	0.693548	2.47297e-16	0.260342	0.00812637	0.438463	2.68082e-06	0.718695	3.82992e-15
EF0371	0.424301	5.07588e-06	0.693548	2.47297e-16	0.260342	0.00812637	0.438463	2.68082e-06	0.718695	3.82992e-15
EF0371	0.424301	5.07588e-06	0.693548	2.47297e-16	0.260342	0.00812637	0.438463	2.68082e-06	0.718695	3.82992e-15
EF0372	0.662677	3.73933e-09	-1.20378	9.27574e-58	0.404487	0.000211301	0.116464	0.357974	-1.39343	2.73141e-48
EF0372	0.662677	3.73933e-09	-1.20378	9.27574e-58	0.404487	0.000211301	0.116464	0.357974	-1.39343	2.73141e-48
EF0372	0.662677	3.73933e-09	-1.20378	9.27574e-58	0.404487	0.000211301	0.116464	0.357974	-1.39343	2.73141e-48
EF0372	0.662677	3.73933e-09	-1.20378	9.27574e-58	0.404487	0.000211301	0.116464	0.357974	-1.39343	2.73141e-48
EF0372	0.662677	3.73933e-09	-1.20378	9.27574e-58	0.404487	0.000211301	0.116464	0.357974	-1.39343	2.73141e-48
EF0372	0.662677	3.73933e-09	-1.20378	9.27574e-58	0.404487	0.000211301	0.116464	0.357974	-1.39343	2.73141e-48
EF0372	0.662677	3.73933e-09	-1.20378	9.27574e-58	0.404487	0.000211301	0.116464	0.357974	-1.39343	2.73141e-48
EF0372	0.662677	3.73933e-09	-1.20378	9.27574e-58	0.404487	0.000211301	0.116464	0.357974	-1.39343	2.73141e-48
EF0373	0.768117	1.93267e-05	-1.71771	5.27145e-74	-0.0712067	0.580426	0.29498	0.0406275	-1.31073	4.01626e-27
EF0373	0.768117	1.93267e-05	-1.71771	5.27145e-74	-0.0712067	0.580426	0.29498	0.0406275	-1.31073	4.01626e-27
EF0373	0.768117	1.93267e-05	-1.71771	5.27145e-74	-0.0712067	0.580426	0.29498	0.0406275	-1.31073	4.01626e-27
EF0373	0.768117	1.93267e-05	-1.71771	5.27145e-74	-0.0712067	0.580426	0.29498	0.0406275	-1.31073	4.01626e-27
EF0373	0.768117	1.93267e-05	-1.71771	5.27145e-74	-0.0712067	0.580426	0.29498	0.0406275	-1.31073	4.01626e-27
EF0373	0.768117	1.93267e-05	-1.71771	5.27145e-74	-0.0712067	0.580426	0.29498	0.0406275	-1.31073	4.01626e-27
EF0373	0.768117	1.93267e-05	-1.71771	5.27145e-74	-0.0712067	0.580426	0.29498	0.0406275	-1.31073	4.01626e-27
EF0373	0.768117	1.93267e-05	-1.71771	5.27145e-74	-0.0712067	0.580426	0.29498	0.0406275	-1.31073	4.01626e-27
EF0373	0.768117	1.93267e-05	-1.71771	5.27145e-74	-0.0712067	0.580426	0.29498	0.0406275	-1.31073	4.01626e-27
EF0373	0.768117	1.93267e-05	-1.71771	5.27145e-74	-0.0712067	0.580426	0.29498	0.0406275	-1.31073	4.01626e-27
EF0373	0.768117	1.93267e-05	-1.71771	5.27145e-74	-0.0712067	0.580426	0.29498	0.0406275	-1.31073	4.01626e-27
EF0373	0.768117	1.93267e-05	-1.71771	5.27145e-74	-0.0712067	0.580426	0.29498	0.0406275	-1.31073	4.01626e-27
EF0373	0.768117	1.93267e-05	-1.71771	5.27145e-74	-0.0712067	0.580426	0.29498	0.0406275	-1.31073	4.01626e-27
EF0373	0.768117	1.93267e-05	-1.71771	5.27145e-74	-0.0712067	0.580426	0.29498	0.0406275	-1.31073	4.01626e-27
EF0373	0.768117	1.93267e-05	-1.71771	5.27145e-74	-0.0712067	0.580426	0.29498	0.0406275	-1.31073	4.01626e-27
EF0373	0.768117	1.93267e-05	-1.71771	5.27145e-74	-0.0712067	0.580426	0.29498	0.0406275	-1.31073	4.01626e-27
EF0373	0.768117	1.93267e-05	-1.71771	5.27145e-74	-0.0712067	0.580426	0.29498	0.0406275	-1.31073	4.01626e-27
EF0373	0.768117	1.93267e-05	-1.71771	5.27145e-74	-0.0712067	0.580426	0.29498	0.0406275	-1.31073	4.01626e-27
EF0373	0.768117	1.93267e-05	-1.71771	5.27145e-74	-0.0712067	0.580426	0.29498	0.0406275	-1.31073	4.01626e-27
EF0373	0.768117	1.93267e-05	-1.71771	5.27145e-74	-0.0712067	0.580426	0.29498	0.0406275	-1.31073	4.01626e-27
EF0373	0.768117	1.93267e-05	-1.71771	5.27145e-74	-0.0712067	0.580426	0.29498	0.0406275	-1.31073	4.01626e-27
EF0373	0.768117	1.93267e-05	-1.71771	5.27145e-74	-0.0712067	0.580426	0.29498	0.0406275	-1.31073	4.01626e-27
EF0373	0.768117	1.93267e-05	-1.71771	5.27145e-74	-0.0712067	0.580426	0.29498	0.0406275	-1.31073	4.01626e-27
EF0373	0.768117	1.93267e-05	-1.71771	5.27145e-74	-0.0712067	0.580426	0.29498	0.0406275	-1.31073	4.01626e-27
EF0373	0.768117	1.93267e-05	-1.71771	5.27145e-74	-0.0712067	0.580426	0.29498	0.0406275	-1.31073	4.01626e-27
EF0373	0.768117	1.93267e-05	-1.71771	5.27145e-74	-0.0712067	0.580426	0.29498	0.0406275	-1.31073	4.01626e-27
EF0373	0.768117	1.93267e-05	-1.71771	5.27145e-74	-0.0712067	0.580426	0.29498	0.0406275	-1.31073	4.01626e-27
EF0373	0.768117	1.93267e-05	-1.71771	5.27145e-74	-0.0712067	0.580426	0.29498	0.0406275	-1.31073	4.01626e-27
EF0373	0.768117	1.93267e-05	-1.71771	5.27145e-74	-0.0712067	0.580426	0.29498	0.0406275	-1.31073	4.01626e-27
EF0373	0.768117	1.93267e-05	-1.71771	5.27145e-74	-0.0712067	0.580426	0.29498	0.0406275	-1.31073	4.01626e-27
EF0373	0.768117	1.93267e-05	-1.71771	5.27145e-74	-0.0712067	0.580426	0.29498	0.0406275	-1.31073	4.01626e-27
EF0373	0.768117	1.93267e-05	-1.71771	5.27145e-74	-0.0712067	0.580426	0.29498	0.0406275	-1.31073	4.01626e-27
EF0373	0.768117	1.93267e-05	-1.71771	5.27145e-74	-0.0712067	0.580426	0.29498	0.0406275	-1.31073	4.01626e-27
EF0373	0.768117	1.93267e-05	-1.71771	5.27145e-74	-0.0712067	0.580426	0.29498	0.0406275	-1.31073	4.01626e-27
EF0373	0.768117	1.93267e-05	-1.71771	5.27145e-74	-0.0712067	0.580426	0.29498	0.0406275	-1.31073	4.01626e-27
EF0373	0.768117	1.93267e-05	-1.71771	5.27145e-74	-0.0712067	0.580426	0.29498	0.0406275	-1.31073	4.01626e-27
EF0373	0.768117	1.93267e-05	-1.71771	5.27145e-74	-0.0712067	0.580426	0.29498	0.0406275	-1.31073	4.01626e-27
EF0373	0.768117	1.93267e-05	-1.71771	5.27145e-74	-0.0712067	0.580426	0.29498	0.0406275	-1.31073	4.01626e-27
EF0373	0.768117	1.93267e-05	-1.71771	5.27145e-74	-0.0712067	0.580426	0.29498	0.0406275	-1.31073	4.01626e-27
EF0373	0.768117	1.93267e-05	-1.71771	5.27145e-74	-0.0712067	0.580426	0.29498	0.0406275	-1.31073	4.01626e-27
EF0373	0.768117	1.93267e-05	-1.71771	5.27145e-74	-0.0712067	0.580426	0.29498	0.0406275	-1.31073	4.01626e-27
EF0373	0.768117	1.93267e-05	-1.71771	5.27145e-74	-0.0712067	0.580426	0.29498	0.0406275	-1.31073	4.01626e-27
EF0373	0.768117	1.93267e-05	-1.71771	5.27145e-74	-0.0712067	0.580426	0.29498	0.0406275	-1.31073	4.01626e-27
EF0373	0.768117	1.93267e-05	-1.71771	5.27145e-74	-0.0712067	0.580426	0.29498	0.0406275	-1.31073	4.01626e-27
EF0373	0.768117	1.93267e-05	-1.71771	5.27145e-74	-0.0712067	0.580426	0.29498	0.0406275	-1.31073	4.01626e-27
EF0373	0.768117	1.93267e-05	-1.71771	5.27145e-74	-0.0712067	0.580426	0.29498	0.0406275	-1.31073	4.01626e-27
EF0373	0.768117	1.93267e-05	-1.71771	5.27145e-74	-0.0712067	0.580426	0.29498	0.0406275	-1.31073	4.01626e-27
EF0373	0.768117	1.93267e-05	-1.71771	5.27145e-74	-0.0712067	0.580426	0.29498	0.0406275	-1.31073	4.01626e-27
EF0373	0.768117	1.93267e-05	-1.71771	5.27145e-74	-0.0712067	0.580426	0.29498	0.0406275	-1.31073	4.01626e-27
EF0373	0.768117	1.93267e-05	-1.71771	5.27145e-74	-0.0712067	0.580426	0.29498	0.0406275	-1.31073	4.01626e-27
EF0373	0.768117	1.93267e-05	-1.71771	5.27145e-74	-0.0712067	0.580426	0.29498	0.0406275	-1.31073	4.01626e-27
EF0373	0.768117	1.93267e-05	-1.71771	5.27145e-74	-0.0712067	0.580426	0.29498	0.0406275	-1.31073	4.01626e-27
EF0373	0.768117	1.93267e-05	-1.71771	5.27145e-74	-0.0712067	0.580426	0.29498	0.0406275	-1.31073	4.01626e-27
EF0373	0.768117	1.93267e-05	-1.71771	5.27145e-74	-0.0712067	0.580426	0.29498	0.0406275	-1.31073	4.01626e-27
EF0373	0.768117	1.93267e-05	-1.71771	5.27145e-74	-0.0712067	0.580426	0.29498	0.0406275	-1.31073	4.01626e-27
EF0373	0.768117	1.93267e-05	-1.71771	5.27145e-74	-0.0712067	0.580426	0.29498	0.0406275	-1.31073	4.01626e-27
EF0374	-0.18023	0.479316	-0.0870265	0.705573	-0.129204	0.593523	0.196864	0.572563	0.133245	0.592361
EF0374	-0.18023	0.479316	-0.0870265	0.705573	-0.129204	0.593523	0.196864	0.572563	0.133245	0.592361
EF0374	-0.18023	0.479316	-0.0870265	0.705573	-0.129204	0.593523	0.196864	0.572563	0.133245	0.592361
EF0374	-0.18023	0.479316	-0.0870265	0.705573	-0.129204	0.593523	0.196864	0.572563	0.133245	0.592361
EF0374	-0.18023	0.479316	-0.0870265	0.705573	-0.129204	0.593523	0.196864	0.572563	0.133245	0.592361
EF0374	-0.18023	0.479316	-0.0870265	0.705573	-0.129204	0.593523	0.196864	0.572563	0.133245	0.592361
EF0374	-0.18023	0.479316	-0.0870265	0.705573	-0.129204	0.593523	0.196864	0.572563	0.133245	0.592361
EF0374	-0.18023	0.479316	-0.0870265	0.705573	-0.129204	0.593523	0.196864	0.572563	0.133245	0.592361
EF0375	-0.13503	0.305215	0.0527079	0.613579	0.175525	0.249802	-0.216229	0.228554	-0.37336	0.00950131
EF0376	0.251967	0.0730111	-0.407529	5.84873e-05	0.227531	0.0976534	0.141107	0.332709	-0.636726	8.69456e-06
EF0376	0.251967	0.0730111	-0.407529	5.84873e-05	0.227531	0.0976534	0.141107	0.332709	-0.636726	8.69456e-06
EF0376	0.251967	0.0730111	-0.407529	5.84873e-05	0.227531	0.0976534	0.141107	0.332709	-0.636726	8.69456e-06
EF0376	0.251967	0.0730111	-0.407529	5.84873e-05	0.227531	0.0976534	0.141107	0.332709	-0.636726	8.69456e-06
EF0376	0.251967	0.0730111	-0.407529	5.84873e-05	0.227531	0.0976534	0.141107	0.332709	-0.636726	8.69456e-06
EF0376	0.251967	0.0730111	-0.407529	5.84873e-05	0.227531	0.0976534	0.141107	0.332709	-0.636726	8.69456e-06
EF0376	0.251967	0.0730111	-0.407529	5.84873e-05	0.227531	0.0976534	0.141107	0.332709	-0.636726	8.69456e-06
EF0376	0.251967	0.0730111	-0.407529	5.84873e-05	0.227531	0.0976534	0.141107	0.332709	-0.636726	8.69456e-06
EF0376	0.251967	0.0730111	-0.407529	5.84873e-05	0.227531	0.0976534	0.141107	0.332709	-0.636726	8.69456e-06
EF0376	0.251967	0.0730111	-0.407529	5.84873e-05	0.227531	0.0976534	0.141107	0.332709	-0.636726	8.69456e-06
EF0376	0.251967	0.0730111	-0.407529	5.84873e-05	0.227531	0.0976534	0.141107	0.332709	-0.636726	8.69456e-06
EF0376	0.251967	0.0730111	-0.407529	5.84873e-05	0.227531	0.0976534	0.141107	0.332709	-0.636726	8.69456e-06
EF0376	0.251967	0.0730111	-0.407529	5.84873e-05	0.227531	0.0976534	0.141107	0.332709	-0.636726	8.69456e-06
EF0376	0.251967	0.0730111	-0.407529	5.84873e-05	0.227531	0.0976534	0.141107	0.332709	-0.636726	8.69456e-06
EF0376	0.251967	0.0730111	-0.407529	5.84873e-05	0.227531	0.0976534	0.141107	0.332709	-0.636726	8.69456e-06
EF0376	0.251967	0.0730111	-0.407529	5.84873e-05	0.227531	0.0976534	0.141107	0.332709	-0.636726	8.69456e-06
EF0376	0.251967	0.0730111	-0.407529	5.84873e-05	0.227531	0.0976534	0.141107	0.332709	-0.636726	8.69456e-06
EF0376	0.251967	0.0730111	-0.407529	5.84873e-05	0.227531	0.0976534	0.141107	0.332709	-0.636726	8.69456e-06
EF0377	0.267515	0.0329311	-0.508464	8.98069e-08	-0.120105	0.337914	0.625821	4.81069e-07	-0.306007	0.00586124
EF0379	-0.169657	0.0713198	-0.49361	1.17417e-10	0.0203531	0.846378	-0.00523491	0.966145	-0.509612	2.70895e-08
EF0380	-0.104053	0.396295	-0.30882	0.0014127	-0.0342673	0.790506	-0.00887864	0.963292	-0.43654	0.0001354
EF0381	-0.298063	0.00155909	-0.861978	4.79223e-28	-0.0393225	0.70669	-0.230307	0.0278795	-1.00017	2.21596e-26
EF0382	-0.332301	4.97427e-06	-0.781621	4.12625e-35	-0.00454801	0.951742	-0.343004	2.57771e-05	-0.84862	6.00234e-27
EF0382	-0.332301	4.97427e-06	-0.781621	4.12625e-35	-0.00454801	0.951742	-0.343004	2.57771e-05	-0.84862	6.00234e-27
EF0382	-0.332301	4.97427e-06	-0.781621	4.12625e-35	-0.00454801	0.951742	-0.343004	2.57771e-05	-0.84862	6.00234e-27
EF0382	-0.332301	4.97427e-06	-0.781621	4.12625e-35	-0.00454801	0.951742	-0.343004	2.57771e-05	-0.84862	6.00234e-27
EF0382	-0.332301	4.97427e-06	-0.781621	4.12625e-35	-0.00454801	0.951742	-0.343004	2.57771e-05	-0.84862	6.00234e-27
EF0382	-0.332301	4.97427e-06	-0.781621	4.12625e-35	-0.00454801	0.951742	-0.343004	2.57771e-05	-0.84862	6.00234e-27
EF0382	-0.332301	4.97427e-06	-0.781621	4.12625e-35	-0.00454801	0.951742	-0.343004	2.57771e-05	-0.84862	6.00234e-27
EF0382	-0.332301	4.97427e-06	-0.781621	4.12625e-35	-0.00454801	0.951742	-0.343004	2.57771e-05	-0.84862	6.00234e-27
EF0382	-0.332301	4.97427e-06	-0.781621	4.12625e-35	-0.00454801	0.951742	-0.343004	2.57771e-05	-0.84862	6.00234e-27
EF0382	-0.332301	4.97427e-06	-0.781621	4.12625e-35	-0.00454801	0.951742	-0.343004	2.57771e-05	-0.84862	6.00234e-27
EF0382	-0.332301	4.97427e-06	-0.781621	4.12625e-35	-0.00454801	0.951742	-0.343004	2.57771e-05	-0.84862	6.00234e-27
EF0382	-0.332301	4.97427e-06	-0.781621	4.12625e-35	-0.00454801	0.951742	-0.343004	2.57771e-05	-0.84862	6.00234e-27
EF0382	-0.332301	4.97427e-06	-0.781621	4.12625e-35	-0.00454801	0.951742	-0.343004	2.57771e-05	-0.84862	6.00234e-27
EF0382	-0.332301	4.97427e-06	-0.781621	4.12625e-35	-0.00454801	0.951742	-0.343004	2.57771e-05	-0.84862	6.00234e-27
EF0382	-0.332301	4.97427e-06	-0.781621	4.12625e-35	-0.00454801	0.951742	-0.343004	2.57771e-05	-0.84862	6.00234e-27
EF0382	-0.332301	4.97427e-06	-0.781621	4.12625e-35	-0.00454801	0.951742	-0.343004	2.57771e-05	-0.84862	6.00234e-27
EF0382	-0.332301	4.97427e-06	-0.781621	4.12625e-35	-0.00454801	0.951742	-0.343004	2.57771e-05	-0.84862	6.00234e-27
EF0382	-0.332301	4.97427e-06	-0.781621	4.12625e-35	-0.00454801	0.951742	-0.343004	2.57771e-05	-0.84862	6.00234e-27
EF0382	-0.332301	4.97427e-06	-0.781621	4.12625e-35	-0.00454801	0.951742	-0.343004	2.57771e-05	-0.84862	6.00234e-27
EF0382	-0.332301	4.97427e-06	-0.781621	4.12625e-35	-0.00454801	0.951742	-0.343004	2.57771e-05	-0.84862	6.00234e-27
EF0382	-0.332301	4.97427e-06	-0.781621	4.12625e-35	-0.00454801	0.951742	-0.343004	2.57771e-05	-0.84862	6.00234e-27
EF0382	-0.332301	4.97427e-06	-0.781621	4.12625e-35	-0.00454801	0.951742	-0.343004	2.57771e-05	-0.84862	6.00234e-27
EF0382	-0.332301	4.97427e-06	-0.781621	4.12625e-35	-0.00454801	0.951742	-0.343004	2.57771e-05	-0.84862	6.00234e-27
EF0382	-0.332301	4.97427e-06	-0.781621	4.12625e-35	-0.00454801	0.951742	-0.343004	2.57771e-05	-0.84862	6.00234e-27
EF0382	-0.332301	4.97427e-06	-0.781621	4.12625e-35	-0.00454801	0.951742	-0.343004	2.57771e-05	-0.84862	6.00234e-27
EF0382	-0.332301	4.97427e-06	-0.781621	4.12625e-35	-0.00454801	0.951742	-0.343004	2.57771e-05	-0.84862	6.00234e-27
EF0382	-0.332301	4.97427e-06	-0.781621	4.12625e-35	-0.00454801	0.951742	-0.343004	2.57771e-05	-0.84862	6.00234e-27
EF0382	-0.332301	4.97427e-06	-0.781621	4.12625e-35	-0.00454801	0.951742	-0.343004	2.57771e-05	-0.84862	6.00234e-27
EF0383	-1.03386	3.03269e-08	-0.920701	5.47961e-09	0.370366	0.160779	-1.09776	5.72766e-06	-1.18588	1.20515e-08
EF0383	-1.03386	3.03269e-08	-0.920701	5.47961e-09	0.370366	0.160779	-1.09776	5.72766e-06	-1.18588	1.20515e-08
EF0383	-1.03386	3.03269e-08	-0.920701	5.47961e-09	0.370366	0.160779	-1.09776	5.72766e-06	-1.18588	1.20515e-08
EF0383	-1.03386	3.03269e-08	-0.920701	5.47961e-09	0.370366	0.160779	-1.09776	5.72766e-06	-1.18588	1.20515e-08
EF0383	-1.03386	3.03269e-08	-0.920701	5.47961e-09	0.370366	0.160779	-1.09776	5.72766e-06	-1.18588	1.20515e-08
EF0383	-1.03386	3.03269e-08	-0.920701	5.47961e-09	0.370366	0.160779	-1.09776	5.72766e-06	-1.18588	1.20515e-08
EF0384	-0.729601	0.000495342	-0.831144	4.34727e-06	0.646541	0.0191917	-1.36701	1.02124e-06	-1.44506	3.64254e-09
EF0385	-0.604892	0.033935	-1.35905	1.76757e-12	0.188295	0.532694	-1.29127	6.56607e-10	-1.42252	1.07697e-14
EF0386	0.00629163	1	-0.723448	0.000843352	0.201191	0.417294	-0.289402	0.363823	-0.6543	0.000859456
EF0387	-0.0111535	0.973974	-1.79562	1.2946e-52	-0.133065	0.478456	0.119999	0.532248	-1.24152	5.41723e-16
EF0388	-0.0448207	0.820451	-1.34153	1.4248e-24	-0.246906	0.149278	0.191852	0.294843	-0.873261	2.32289e-10
EF0389	-0.16609	0.634502	-0.378273	0.144117	-0.191506	0.473025	-0.0335129	0.954652	0.0540394	0.832153
EF0390	-0.135649	0.285115	-0.522503	1.16976e-07	0.196732	0.109436	-0.267737	0.0809924	-0.608326	2.76848e-08
EF0390	-0.135649	0.285115	-0.522503	1.16976e-07	0.196732	0.109436	-0.267737	0.0809924	-0.608326	2.76848e-08
EF0390	-0.135649	0.285115	-0.522503	1.16976e-07	0.196732	0.109436	-0.267737	0.0809924	-0.608326	2.76848e-08
EF0390	-0.135649	0.285115	-0.522503	1.16976e-07	0.196732	0.109436	-0.267737	0.0809924	-0.608326	2.76848e-08
EF0390	-0.135649	0.285115	-0.522503	1.16976e-07	0.196732	0.109436	-0.267737	0.0809924	-0.608326	2.76848e-08
EF0390	-0.135649	0.285115	-0.522503	1.16976e-07	0.196732	0.109436	-0.267737	0.0809924	-0.608326	2.76848e-08
EF0390	-0.135649	0.285115	-0.522503	1.16976e-07	0.196732	0.109436	-0.267737	0.0809924	-0.608326	2.76848e-08
EF0390	-0.135649	0.285115	-0.522503	1.16976e-07	0.196732	0.109436	-0.267737	0.0809924	-0.608326	2.76848e-08
EF0392	0.0551937	0.665153	0.169663	0.112565	-0.127047	0.310435	0.252167	0.0515598	0.102943	0.365841
EF0392	0.0551937	0.665153	0.169663	0.112565	-0.127047	0.310435	0.252167	0.0515598	0.102943	0.365841
EF0394	0.617981	0.0012158	0.790918	1.79351e-05	0.196908	0.307463	0.309587	0.00330537	0.643788	1.64381e-14
EF0395	-0.257376	0.00421682	0.719761	6.25319e-17	0.217465	0.0364946	-0.343767	1.51208e-05	0.36324	2.17427e-06
EF0396	0.124852	0.163878	-1.02067	9.6475e-13	0.18021	0.0629553	-0.129799	0.0867301	-1.17364	1.57242e-58
EF0397	0.10844	0.184197	-0.904005	5.93139e-50	0.329055	0.000257706	0.230508	0.0192633	-1.16793	4.50386e-44
EF0399	0.732891	1.71678e-22	0.569352	3.41762e-18	0.457731	4.08609e-05	0.331399	0.00579978	0.333715	0.00386766
EF0400	0.428528	1.02082e-06	0.428851	1.79139e-07	0.374755	0.000673367	0.146678	0.0831028	0.167203	0.0563333
EF0401	0.00144278	0.992561	0.247584	0.114547	0.29003	0.0123451	-0.154452	0.0824811	-0.0673624	0.386377
EF0402	0.195981	0.0392828	-0.670973	2.38466e-23	0.236828	0.021075	-0.854071	1.30546e-18	-1.00756	5.51278e-26
EF0403	-0.190583	0.276791	-1.44268	6.68921e-27	-0.458952	0.00296519	0.0942303	0.556745	-1.19718	4.67091e-23
EF0404	-0.0516181	0.683619	-1.17666	5.18292e-39	-0.37744	0.00213126	0.167057	0.190555	-0.847248	2.06658e-18
EF0405	-0.406014	6.1238e-06	-0.847012	9.43889e-35	-0.0873502	0.386514	-0.142367	0.174963	-0.926489	9.44589e-23
EF0405	-0.406014	6.1238e-06	-0.847012	9.43889e-35	-0.0873502	0.386514	-0.142367	0.174963	-0.926489	9.44589e-23
EF0406	0.0824277	0.454011	-0.70776	1.84891e-21	0.127866	0.253557	-0.0990089	0.458846	-0.605355	3.71739e-09
EF0407	0.218818	0.0148656	-0.527142	2.51351e-15	0.148459	0.121635	-0.137115	0.154793	-0.393098	1.01634e-05
EF0408	0.0777989	0.543849	-0.186044	0.0668444	0.0956361	0.459063	-0.351157	0.00230363	-0.118947	0.284928
EF0411	-0.830213	4.51353e-06	-1.70144	3.00321e-33	-0.0196559	0.973726	-3.12136	1.30577e-135	-3.84862	2.71822e-238
EF0412	-1.22841	1.54373e-05	-2.00434	1.38535e-17	0.205177	0.534864	-3.5947	5.19828e-74	-3.30907	1.2772e-53
EF0413	-0.26059	0.092859	-0.954458	4.67852e-17	0.474467	0.0121553	-2.6135	2.99595e-72	-1.32657	4.95917e-16
EF0413	-0.26059	0.092859	-0.954458	4.67852e-17	0.474467	0.0121553	-2.6135	2.99595e-72	-1.32657	4.95917e-16
EF0414	-0.20964	0.0235924	-0.354486	3.51702e-05	0.00800959	0.946866	0.0812524	0.360017	-0.400807	3.62618e-07
EF0415	1.01737	0.000212391	0.518931	0.0208051	0.323768	0.179246	0.493652	0.0880949	0.290827	0.18224
EF0415	1.01737	0.000212391	0.518931	0.0208051	0.323768	0.179246	0.493652	0.0880949	0.290827	0.18224
EF0415	1.01737	0.000212391	0.518931	0.0208051	0.323768	0.179246	0.493652	0.0880949	0.290827	0.18224
EF0415	1.01737	0.000212391	0.518931	0.0208051	0.323768	0.179246	0.493652	0.0880949	0.290827	0.18224
EF0415	1.01737	0.000212391	0.518931	0.0208051	0.323768	0.179246	0.493652	0.0880949	0.290827	0.18224
EF0415	1.01737	0.000212391	0.518931	0.0208051	0.323768	0.179246	0.493652	0.0880949	0.290827	0.18224
EF0415	1.01737	0.000212391	0.518931	0.0208051	0.323768	0.179246	0.493652	0.0880949	0.290827	0.18224
EF0415	1.01737	0.000212391	0.518931	0.0208051	0.323768	0.179246	0.493652	0.0880949	0.290827	0.18224
EF0417	0.448193	9.69967e-07	0.618438	2.48269e-15	0.309253	0.0030658	0.644978	9.09178e-09	0.234177	0.0275659
EF0417	0.448193	9.69967e-07	0.618438	2.48269e-15	0.309253	0.0030658	0.644978	9.09178e-09	0.234177	0.0275659
EF0417	0.448193	9.69967e-07	0.618438	2.48269e-15	0.309253	0.0030658	0.644978	9.09178e-09	0.234177	0.0275659
EF0417	0.448193	9.69967e-07	0.618438	2.48269e-15	0.309253	0.0030658	0.644978	9.09178e-09	0.234177	0.0275659
EF0417	0.448193	9.69967e-07	0.618438	2.48269e-15	0.309253	0.0030658	0.644978	9.09178e-09	0.234177	0.0275659
EF0419	-0.203473	0.00115416	0.209633	0.000206994	-0.192633	0.0730883	0.151481	0.0899553	0.318975	0.000193513
EF0420	0.291009	0.000388989	-0.117171	0.0494096	-0.330165	8.83381e-05	0.7019	1.71592e-13	0.290141	0.000615484
EF0421	1.06125	9.67793e-06	0.64829	3.24582e-05	-0.120768	0.408673	0.848524	8.40845e-07	1.51045	4.21077e-21
EF0422	0.245179	0.0891993	-0.481467	9.44619e-07	-0.30777	0.00935998	0.383797	0.0029582	0.0150917	0.8895
EF0423	-0.279355	0.479116	0.174079	0.683988	-0.182641	0.646824	-0.219505	0.568266
EF0424	-0.0884643	0.780035	0.0785723	0.742623	-0.148302	0.650028	-0.0642488	0.877446	0.0868395	0.799697
EF0426	-0.703798	7.66677e-05	-0.0239179	0.970929	0.0894795	0.644279	-0.800585	5.4379e-05	-0.281816	0.0973556
EF0429									-1.14952	0.00523433
EF0431	-1.444	9.4452e-05	-2.13374	1.29117e-12	-0.771185	0.0493678	-0.665516	0.0365814	-1.11793	2.0269e-05
EF0431	-1.444	9.4452e-05	-2.13374	1.29117e-12	-0.771185	0.0493678	-0.665516	0.0365814	-1.11793	2.0269e-05
EF0432							-1.13368	0.00294594	-0.27447	0.491874
EF0433									1.21051	0.0168404
EF0434							0.0436326	0.933616	0.152597	0.694994
EF0437			-0.636791	0.0372258	-0.566749	0.124959	-0.00747191	1	0.22904	0.517674
EF0438	-0.358754	0.279223	-1.51268	4.00516e-10	-0.47478	0.163339	0.411792	0.167159	-0.479167	0.0640294
EF0439	-0.842572	2.19256e-10	0.148541	0.292681	0.208666	0.145253	-0.649541	1.63019e-05	-0.354623	0.00765223
EF0440	0.508841	1.6205e-08	-0.387048	0.000114014	-0.165426	0.108291	-0.344322	0.000240955	0.129785	0.151966
EF0440	0.508841	1.6205e-08	-0.387048	0.000114014	-0.165426	0.108291	-0.344322	0.000240955	0.129785	0.151966
EF0440	0.508841	1.6205e-08	-0.387048	0.000114014	-0.165426	0.108291	-0.344322	0.000240955	0.129785	0.151966
EF0440	0.508841	1.6205e-08	-0.387048	0.000114014	-0.165426	0.108291	-0.344322	0.000240955	0.129785	0.151966
EF0443	-0.873192	4.78582e-14	0.998603	3.00257e-17	-1.19433	3.94603e-29	-0.669569	2.28685e-09	2.18965	1.36839e-57
EF0445	0.0104268	0.914158	0.637433	5.88901e-13	0.265456	0.0116712	0.00799154	0.92135	0.459204	8.44252e-09
EF0445	0.0104268	0.914158	0.637433	5.88901e-13	0.265456	0.0116712	0.00799154	0.92135	0.459204	8.44252e-09
EF0445	0.0104268	0.914158	0.637433	5.88901e-13	0.265456	0.0116712	0.00799154	0.92135	0.459204	8.44252e-09
EF0445	0.0104268	0.914158	0.637433	5.88901e-13	0.265456	0.0116712	0.00799154	0.92135	0.459204	8.44252e-09
EF0445	0.0104268	0.914158	0.637433	5.88901e-13	0.265456	0.0116712	0.00799154	0.92135	0.459204	8.44252e-09
EF0445	0.0104268	0.914158	0.637433	5.88901e-13	0.265456	0.0116712	0.00799154	0.92135	0.459204	8.44252e-09
EF0445	0.0104268	0.914158	0.637433	5.88901e-13	0.265456	0.0116712	0.00799154	0.92135	0.459204	8.44252e-09
EF0445	0.0104268	0.914158	0.637433	5.88901e-13	0.265456	0.0116712	0.00799154	0.92135	0.459204	8.44252e-09
EF0446	-0.173872	0.0486496	0.687089	1.22028e-16	0.023938	0.810454	0.0582965	0.445792	0.638185	1.16158e-15
EF0447	-0.108562	0.484297	0.527203	3.02176e-11	0.00589897	0.972048	-0.0681596	0.464951	0.440011	2.01797e-09
EF0448	-0.0500158	0.763467	0.513435	0.00127982	0.0682661	0.689821	-0.106655	0.263919	0.329213	4.16908e-05
EF0449	-0.102153	0.268418	0.45234	4.97027e-08	0.00694943	0.942878	-0.145741	0.0496383	0.305975	2.8875e-05
EF0450	-0.0800986	0.364116	0.393233	1.31718e-06	0.117994	0.228043	-0.244701	0.00298977	0.250482	0.000706683
EF0451	-0.0933149	0.316495	0.665886	8.66066e-15	0.226773	0.0257593	-0.234427	0.0294294	0.32433	0.00534069
EF0452	0.0272442	0.874438	0.898176	5.14287e-08	0.0441919	0.801045	0.0529151	0.585437	0.720999	3.30014e-22
EF0452	0.0272442	0.874438	0.898176	5.14287e-08	0.0441919	0.801045	0.0529151	0.585437	0.720999	3.30014e-22
EF0452	0.0272442	0.874438	0.898176	5.14287e-08	0.0441919	0.801045	0.0529151	0.585437	0.720999	3.30014e-22
EF0452	0.0272442	0.874438	0.898176	5.14287e-08	0.0441919	0.801045	0.0529151	0.585437	0.720999	3.30014e-22
EF0452	0.0272442	0.874438	0.898176	5.14287e-08	0.0441919	0.801045	0.0529151	0.585437	0.720999	3.30014e-22
EF0452	0.0272442	0.874438	0.898176	5.14287e-08	0.0441919	0.801045	0.0529151	0.585437	0.720999	3.30014e-22
EF0452	0.0272442	0.874438	0.898176	5.14287e-08	0.0441919	0.801045	0.0529151	0.585437	0.720999	3.30014e-22
EF0452	0.0272442	0.874438	0.898176	5.14287e-08	0.0441919	0.801045	0.0529151	0.585437	0.720999	3.30014e-22
EF0453	-0.302899	0.0799266	0.130731	0.436345	0.0120133	0.945568	-0.0689722	0.470584	0.087541	0.275901
EF0453	-0.302899	0.0799266	0.130731	0.436345	0.0120133	0.945568	-0.0689722	0.470584	0.087541	0.275901
EF0453	-0.302899	0.0799266	0.130731	0.436345	0.0120133	0.945568	-0.0689722	0.470584	0.087541	0.275901
EF0453	-0.302899	0.0799266	0.130731	0.436345	0.0120133	0.945568	-0.0689722	0.470584	0.087541	0.275901
EF0454	0.170216	0.624297	-0.813212	0.00110056	-0.412487	0.175125	-0.0376914	0.929265	-0.173048	0.50814
EF0455	0.0316658	0.924699	0.0175416	0.969605	0.296761	0.292415	-0.21923	0.454207	-0.859595	0.000105349
EF0456	-0.718706	0.0198198	-0.225046	0.491975	0.186482	0.543313	-1.05012	0.000111568	-0.576246	0.0258984
EF0457	0.311988	0.150752	0.0334652	0.852539	-0.179213	0.355058	0.269376	0.231714	0.0608546	0.724227
EF0458	0.509937	0.000294716	-0.00223988	0.986381	0.115827	0.326832	0.451078	0.000317243	-0.198982	0.0628939
EF0459	-0.203477	0.0452204	0.0812273	0.335759	0.0426096	0.678424	0.0758059	0.509367	-0.23631	0.0101458
EF0460	-0.626615	7.38909e-09	-0.218881	0.0160102	0.0538843	0.615212	-0.533461	4.8702e-07	-0.503155	8.36197e-08
EF0461	-0.801824	1.33024e-05	-0.25994	0.177219	0.23295	0.233204	-1.21422	4.10605e-17	-0.597539	9.08941e-05
EF0462	0.541867	1.5793e-06	-0.594672	6.96354e-15	0.11079	0.26818	0.626949	2.0433e-08	-0.179566	0.0529864
EF0462	0.541867	1.5793e-06	-0.594672	6.96354e-15	0.11079	0.26818	0.626949	2.0433e-08	-0.179566	0.0529864
EF0463	-0.424141	0.0186488	0.650252	0.000115261	-0.302093	0.0944973	0.280209	0.00464556	0.918047	1.65998e-31
EF0464	0.33559	0.000875893	0.704826	3.89156e-16	0.101129	0.27576	0.278694	0.00738337	0.549204	3.36273e-08
EF0465	0.142071	0.190343	0.40462	1.83266e-06	-0.211041	0.0293334	0.0921202	0.198589	0.714639	4.2621e-24
EF0466	-0.0939736	0.371962	0.0895207	0.206669	-0.375	7.90698e-06	0.0886297	0.296917	0.306648	0.000359439
EF0467	-0.184405	0.0614665	-0.616887	1.25969e-13	0.188017	0.0822436	-0.370838	0.000541355	-0.687647	1.23836e-13
EF0468	-0.18028	0.0632461	0.0883257	0.245995	0.192344	0.0253976	0.466337	2.79124e-06	-0.649694	2.95689e-12
EF0468	-0.18028	0.0632461	0.0883257	0.245995	0.192344	0.0253976	0.466337	2.79124e-06	-0.649694	2.95689e-12
EF0468	-0.18028	0.0632461	0.0883257	0.245995	0.192344	0.0253976	0.466337	2.79124e-06	-0.649694	2.95689e-12
EF0468	-0.18028	0.0632461	0.0883257	0.245995	0.192344	0.0253976	0.466337	2.79124e-06	-0.649694	2.95689e-12
EF0468	-0.18028	0.0632461	0.0883257	0.245995	0.192344	0.0253976	0.466337	2.79124e-06	-0.649694	2.95689e-12
EF0468	-0.18028	0.0632461	0.0883257	0.245995	0.192344	0.0253976	0.466337	2.79124e-06	-0.649694	2.95689e-12
EF0468	-0.18028	0.0632461	0.0883257	0.245995	0.192344	0.0253976	0.466337	2.79124e-06	-0.649694	2.95689e-12
EF0469	-0.647532	2.08892e-10	-0.193587	0.0269786	0.13957	0.192248	0.0298525	0.752674	-0.850726	5.99951e-29
EF0469	-0.647532	2.08892e-10	-0.193587	0.0269786	0.13957	0.192248	0.0298525	0.752674	-0.850726	5.99951e-29
EF0469	-0.647532	2.08892e-10	-0.193587	0.0269786	0.13957	0.192248	0.0298525	0.752674	-0.850726	5.99951e-29
EF0469	-0.647532	2.08892e-10	-0.193587	0.0269786	0.13957	0.192248	0.0298525	0.752674	-0.850726	5.99951e-29
EF0469	-0.647532	2.08892e-10	-0.193587	0.0269786	0.13957	0.192248	0.0298525	0.752674	-0.850726	5.99951e-29
EF0469	-0.647532	2.08892e-10	-0.193587	0.0269786	0.13957	0.192248	0.0298525	0.752674	-0.850726	5.99951e-29
EF0469	-0.647532	2.08892e-10	-0.193587	0.0269786	0.13957	0.192248	0.0298525	0.752674	-0.850726	5.99951e-29
EF0470	-0.276566	0.103442	0.364449	0.0225408	-0.323029	0.062713	-0.472705	1.06929e-06	1.06199	7.2418e-44
EF0471	-0.191209	0.295502	0.177619	0.318917	-0.307902	0.111057	-0.452402	5.76626e-05	0.891424	3.48935e-22
EF0472	-0.0272456	0.69807	0.00322106	0.968101	-0.284226	0.00472121	-0.117266	0.110716	0.628598	6.78605e-18
EF0473	-0.201581	0.0236442	0.669762	3.8159e-16	-0.203342	0.0325967	-0.381947	2.0088e-08	1.18852	4.53588e-64
EF0475	1.27249	4.93715e-05	-5.21417	0	-4.9179	8.14262e-198	1.39101	3.69109e-35	-0.335564	0.00085584
EF0475	1.27249	4.93715e-05	-5.21417	0	-4.9179	8.14262e-198	1.39101	3.69109e-35	-0.335564	0.00085584
EF0475	1.27249	4.93715e-05	-5.21417	0	-4.9179	8.14262e-198	1.39101	3.69109e-35	-0.335564	0.00085584
EF0476	-0.448327	0.000218274	-5.96806	5.21986e-189	-5.78599	1.69168e-292	-0.346755	0.00173704	-0.37988	3.34197e-05
EF0476	-0.448327	0.000218274	-5.96806	5.21986e-189	-5.78599	1.69168e-292	-0.346755	0.00173704	-0.37988	3.34197e-05
EF0476	-0.448327	0.000218274	-5.96806	5.21986e-189	-5.78599	1.69168e-292	-0.346755	0.00173704	-0.37988	3.34197e-05
EF0477	-0.481365	0.247991	-6.40317	0	-6.27862	8.8444e-307	-0.480022	3.10708e-08	-0.184536	0.0211044
EF0477	-0.481365	0.247991	-6.40317	0	-6.27862	8.8444e-307	-0.480022	3.10708e-08	-0.184536	0.0211044
EF0477	-0.481365	0.247991	-6.40317	0	-6.27862	8.8444e-307	-0.480022	3.10708e-08	-0.184536	0.0211044
EF0629	-0.276675	0.00189651	0.829214	2.24807e-26	0.386394	1.31046e-05	0.0128984	0.901533	0.528198	1.96724e-08
EF0630	-0.291314	0.00111443	1.3824	3.95284e-61	0.410519	1.38214e-05	-0.611005	3.51678e-09	1.01106	7.38697e-21
EF0631	0.833986	1.22943e-19	0.0753395	0.298878	0.351733	3.61913e-05	0.358322	6.01699e-05	-0.075607	0.352093
EF0633	-0.474204	0.00840684	0.682782	4.47262e-05	-0.211149	0.249009	-1.0789	8.25133e-24	0.55155	3.77218e-11
EF0634	-0.01001	0.954786	1.70423	7.1122e-24	-0.524015	0.00487223	-0.532428	2.06258e-07	2.5613	3.6519e-224
EF0634	-0.01001	0.954786	1.70423	7.1122e-24	-0.524015	0.00487223	-0.532428	2.06258e-07	2.5613	3.6519e-224
EF0635	-0.0960602	0.292175	1.78122	2.44468e-89	-0.343893	0.0435317	-0.805748	3.68537e-14	2.53436	1.35032e-192
EF0636	0.316094	0.000393922	1.87945	6.36804e-138	-0.459737	3.68058e-07	-0.775316	2.29148e-18	2.66849	2.67845e-157
EF0637	-0.558129	0.00385493	0.438284	0.0156606	0.102877	0.571312	-0.116028	0.262566	0.0571625	0.464769
EF0638	-0.606922	9.26696e-11	-0.615649	6.01531e-16	0.118945	0.219899	0.330813	0.00451404	-0.876983	3.64748e-19
EF0638	-0.606922	9.26696e-11	-0.615649	6.01531e-16	0.118945	0.219899	0.330813	0.00451404	-0.876983	3.64748e-19
EF0639	0.0823322	0.362961	-0.669827	1.05023e-25	0.122608	0.195541	-0.0821837	0.41046	-0.886712	6.00106e-24
EF0641	0.319231	0.030514	-0.668308	4.14795e-11	0.534318	7.88325e-05	-0.124946	0.320868	-1.23605	1.9979e-34
EF0642	0.693809	9.33656e-05	-0.429756	0.001128	0.386743	0.00895608	0.243035	0.19518	-0.723666	7.56819e-08
EF0643	0.157408	0.278668	-0.408979	0.000553408	0.18843	0.14154	-0.0527205	0.717852	-0.476206	0.00113335
EF0644	-0.0173552	0.890387	-0.25638	0.00586408	-0.020043	0.859289	0.320146	0.00833489	-0.338726	0.000847999
EF0644	-0.0173552	0.890387	-0.25638	0.00586408	-0.020043	0.859289	0.320146	0.00833489	-0.338726	0.000847999
EF0644	-0.0173552	0.890387	-0.25638	0.00586408	-0.020043	0.859289	0.320146	0.00833489	-0.338726	0.000847999
EF0644	-0.0173552	0.890387	-0.25638	0.00586408	-0.020043	0.859289	0.320146	0.00833489	-0.338726	0.000847999
EF0644	-0.0173552	0.890387	-0.25638	0.00586408	-0.020043	0.859289	0.320146	0.00833489	-0.338726	0.000847999
EF0644	-0.0173552	0.890387	-0.25638	0.00586408	-0.020043	0.859289	0.320146	0.00833489	-0.338726	0.000847999
EF0644	-0.0173552	0.890387	-0.25638	0.00586408	-0.020043	0.859289	0.320146	0.00833489	-0.338726	0.000847999
EF0644	-0.0173552	0.890387	-0.25638	0.00586408	-0.020043	0.859289	0.320146	0.00833489	-0.338726	0.000847999
EF0645	0.782049	0.0635733	-1.05582	8.14571e-05	0.029433	1	0.488481	0.184964	-0.0800955	0.829777
EF0645	0.782049	0.0635733	-1.05582	8.14571e-05	0.029433	1	0.488481	0.184964	-0.0800955	0.829777
EF0645	0.782049	0.0635733	-1.05582	8.14571e-05	0.029433	1	0.488481	0.184964	-0.0800955	0.829777
EF0645	0.782049	0.0635733	-1.05582	8.14571e-05	0.029433	1	0.488481	0.184964	-0.0800955	0.829777
EF0646	-0.0645376	0.855322	-1.27163	2.91835e-10	0.00794966	1	-0.127663	0.644561	-0.899471	1.98738e-05
EF0646	-0.0645376	0.855322	-1.27163	2.91835e-10	0.00794966	1	-0.127663	0.644561	-0.899471	1.98738e-05
EF0646	-0.0645376	0.855322	-1.27163	2.91835e-10	0.00794966	1	-0.127663	0.644561	-0.899471	1.98738e-05
EF0646	-0.0645376	0.855322	-1.27163	2.91835e-10	0.00794966	1	-0.127663	0.644561	-0.899471	1.98738e-05
EF0647	0.997494	2.96689e-14	-1.21157	1.06563e-43	0.199745	0.112908	0.432016	0.00300058	-1.11979	2.3298e-23
EF0648	0.0251535	0.96376	-0.929512	1.08764e-08	-0.112861	0.647228	0.166154	0.562024	-0.806683	5.94109e-05
EF0650	0.586543	2.98205e-12	-0.152988	0.0162623	0.0908321	0.281234	0.704658	9.27613e-15	-0.00196627	0.988036
EF0652	0.0388911	0.851133	-0.999959	1.51164e-07	-0.0447347	0.889623	-0.12374	0.582921	-1.19865	4.16554e-14
EF0653	0.194924	0.550664	-0.58356	0.00739253	-0.236903	0.359894	0.380239	0.137836	-0.471937	0.0148811
EF0654	-0.192158	0.302263	-1.06062	3.7728e-14	-0.197984	0.281565	-0.595175	0.000343497	-0.3465	0.0420437
EF0655	0.30776	0.0126685	-0.0732475	0.502758	-0.245907	0.0263223	0.711359	5.54833e-09	0.0577409	0.589347
EF0656	0.118819	0.378685	-0.0848399	0.415764	-0.322396	0.00920029	0.583546	0.000460349	0.381369	0.00135356
EF0657	-0.0874139	0.365307	0.808524	1.04501e-19	-0.213042	0.0392014	0.459325	2.63376e-05	0.952363	4.67171e-17
EF0658	-0.208228	0.00600485	0.832631	2.13293e-38	-0.107393	0.25926	-0.0634149	0.530733	0.828247	1.88583e-16
EF0658	-0.208228	0.00600485	0.832631	2.13293e-38	-0.107393	0.25926	-0.0634149	0.530733	0.828247	1.88583e-16
EF0659	-0.262677	0.00517819	0.783982	7.77291e-18	-0.296752	0.00392561	-0.0509074	0.643362	1.22884	3.46052e-30
EF0660	0.599153	0.000108488	-0.919108	5.7739e-17	0.026011	0.874476	0.0466225	0.776714	-0.740232	1.25009e-09
EF0661	0.0827388	0.631287	0.0378375	0.825155	0.285325	0.110767	0.119693	0.241656	-0.412357	2.57571e-06
EF0662	0.617702	0.00123775	-0.21127	0.224672	-0.377554	0.0170742	0.297287	0.054846	0.538523	4.33896e-05
EF0663	-0.723608	8.09325e-11	0.0434563	0.648121	0.227197	0.177876	-0.930998	7.51588e-10	-0.237847	0.114662
EF0664	-1.80471	1.54138e-55	0.0856676	0.526144	-0.00127757	0.972243	-1.80561	7.35502e-58	-0.482496	0.000305025
EF0665	-0.432418	4.26405e-05	0.614558	1.11361e-09	0.311111	0.00625049	-0.538788	7.68181e-13	0.219819	0.00904358
EF0666	-0.380788	0.0243762	-0.736261	1.72611e-05	-0.18325	0.283982	-0.0779976	0.42062	-0.66876	5.78083e-15
EF0667	0.642959	1.60102e-18	-0.573883	6.23981e-25	-0.177338	0.0185029	0.587897	8.40228e-14	-0.281776	0.000321283
EF0668	-0.0643383	0.521663	0.128117	0.171284	-0.04977	0.639138	-0.116371	0.165379	0.367165	2.88185e-07
EF0669	0.578542	2.29893e-10	-0.348415	2.67935e-05	0.139526	0.174967	-0.113873	0.15163	-0.227852	0.00233828
EF0671	-0.309132	0.0926116	0.391023	0.0290886	0.310406	0.094427	-0.403874	0.000297243	-0.00973185	0.914866
EF0672	-0.0802021	0.5986	0.379272	0.00653073	0.120356	0.436669	-0.150584	0.345068	0.301986	0.0297105
EF0673	0.367994	0.0310627	-1.706	1.09734e-47	-0.529046	0.000270056	0.292488	0.0148758	-0.901515	3.20891e-19
EF0674	-0.18813	0.0177932	-0.142403	0.0180189	-0.158726	0.0565007	0.338769	0.00041574	0.0277612	0.745598
EF0675	-0.308774	1.35094e-05	-0.418726	1.03442e-11	-0.0492289	0.514382	-0.124297	0.116004	-0.355146	2.02402e-06
EF0676	-0.198219	0.0193317	0.772997	5.00081e-24	0.35054	0.000104887	-0.00545637	0.955648	0.149561	0.0596413
EF0677	-0.907517	4.54682e-34	0.245643	0.000112191	0.166224	0.0895681	-0.591904	6.19557e-10	-0.194445	0.0352253
EF0678	-1.50919	8.33191e-35	-0.484599	2.96699e-08	0.160506	0.130145	-1.52161	4.73339e-51	-0.715286	4.94516e-13
EF0680	0.157474	0.0948213	-0.00151556	0.989659	0.0129919	0.903244	0.274455	0.000994968	-0.0620771	0.428461
EF0681	-0.290083	0.113377	0.248572	0.146005	-0.12923	0.477444	-0.25212	0.0185992	0.228145	0.00511746
EF0682	0.00205842	0.974723	0.556817	7.54514e-22	-0.261252	0.00819506	-0.291869	9.12152e-05	0.792631	1.51535e-25
EF0683	-0.0827271	0.368117	0.328468	9.22193e-05	-0.387532	0.0259945	-0.425594	9.0197e-05	0.688358	1.20521e-13
EF0684	-0.122957	0.207945	0.256331	0.00305143	-0.107121	0.284105	-0.859791	1.3833e-23	0.236875	0.000917958
EF0685	0.0339688	0.855924	0.228669	0.217985	-0.120307	0.55333	0.569119	5.16101e-06	0.272703	0.0130865
EF0686	0.0224912	0.81636	0.208897	0.00127982	-0.12027	0.334962	0.602774	7.70562e-08	0.133955	0.245625
EF0687	0.329354	0.000215963	0.139278	0.0254161	-0.131602	0.199643	0.944641	2.31647e-18	0.254603	0.0116411
EF0688	0.481212	8.57872e-11	0.0104206	0.861099	0.353346	5.07387e-05	1.1467	4.5597e-37	-0.264306	0.000741996
EF0689	-0.0298232	0.696046	-0.611629	1.60049e-24	0.160952	0.0529439	0.238132	0.00926653	-0.579123	9.17767e-13
EF0690	-0.0746887	0.345871	-0.652516	6.57091e-27	-0.330347	2.68012e-05	-0.261203	0.00154758	0.0699504	0.372499
EF0691	0.343342	5.05827e-05	-0.219343	0.000243613	0.188798	0.0467509	0.14825	0.149057	-0.122744	0.184505
EF0692	0.262698	0.147447	-0.0572518	0.704326	-0.187291	0.231526	0.471138	0.0127767	0.063844	0.685962
EF0692	0.262698	0.147447	-0.0572518	0.704326	-0.187291	0.231526	0.471138	0.0127767	0.063844	0.685962
EF0692	0.262698	0.147447	-0.0572518	0.704326	-0.187291	0.231526	0.471138	0.0127767	0.063844	0.685962
EF0692	0.262698	0.147447	-0.0572518	0.704326	-0.187291	0.231526	0.471138	0.0127767	0.063844	0.685962
EF0692	0.262698	0.147447	-0.0572518	0.704326	-0.187291	0.231526	0.471138	0.0127767	0.063844	0.685962
EF0692	0.262698	0.147447	-0.0572518	0.704326	-0.187291	0.231526	0.471138	0.0127767	0.063844	0.685962
EF0693	-3.77065	1.40869e-253	0.332847	0.0149715	-1.64806	1.23963e-37	-2.85723	5.65883e-174	2.02717	1.25467e-57
EF0693	-3.77065	1.40869e-253	0.332847	0.0149715	-1.64806	1.23963e-37	-2.85723	5.65883e-174	2.02717	1.25467e-57
EF0693	-3.77065	1.40869e-253	0.332847	0.0149715	-1.64806	1.23963e-37	-2.85723	5.65883e-174	2.02717	1.25467e-57
EF0693	-3.77065	1.40869e-253	0.332847	0.0149715	-1.64806	1.23963e-37	-2.85723	5.65883e-174	2.02717	1.25467e-57
EF0693	-3.77065	1.40869e-253	0.332847	0.0149715	-1.64806	1.23963e-37	-2.85723	5.65883e-174	2.02717	1.25467e-57
EF0693	-3.77065	1.40869e-253	0.332847	0.0149715	-1.64806	1.23963e-37	-2.85723	5.65883e-174	2.02717	1.25467e-57
EF0693	-3.77065	1.40869e-253	0.332847	0.0149715	-1.64806	1.23963e-37	-2.85723	5.65883e-174	2.02717	1.25467e-57
EF0693	-3.77065	1.40869e-253	0.332847	0.0149715	-1.64806	1.23963e-37	-2.85723	5.65883e-174	2.02717	1.25467e-57
EF0693	-3.77065	1.40869e-253	0.332847	0.0149715	-1.64806	1.23963e-37	-2.85723	5.65883e-174	2.02717	1.25467e-57
EF0693	-3.77065	1.40869e-253	0.332847	0.0149715	-1.64806	1.23963e-37	-2.85723	5.65883e-174	2.02717	1.25467e-57
EF0693	-3.77065	1.40869e-253	0.332847	0.0149715	-1.64806	1.23963e-37	-2.85723	5.65883e-174	2.02717	1.25467e-57
EF0693	-3.77065	1.40869e-253	0.332847	0.0149715	-1.64806	1.23963e-37	-2.85723	5.65883e-174	2.02717	1.25467e-57
EF0693	-3.77065	1.40869e-253	0.332847	0.0149715	-1.64806	1.23963e-37	-2.85723	5.65883e-174	2.02717	1.25467e-57
EF0693	-3.77065	1.40869e-253	0.332847	0.0149715	-1.64806	1.23963e-37	-2.85723	5.65883e-174	2.02717	1.25467e-57
EF0693	-3.77065	1.40869e-253	0.332847	0.0149715	-1.64806	1.23963e-37	-2.85723	5.65883e-174	2.02717	1.25467e-57
EF0693	-3.77065	1.40869e-253	0.332847	0.0149715	-1.64806	1.23963e-37	-2.85723	5.65883e-174	2.02717	1.25467e-57
EF0693	-3.77065	1.40869e-253	0.332847	0.0149715	-1.64806	1.23963e-37	-2.85723	5.65883e-174	2.02717	1.25467e-57
EF0693	-3.77065	1.40869e-253	0.332847	0.0149715	-1.64806	1.23963e-37	-2.85723	5.65883e-174	2.02717	1.25467e-57
EF0694	-3.67872	3.99871e-168	-0.0283278	0.934699	-0.496364	0.0140735	-4.22832	8.47355e-248	0.793926	3.87942e-05
EF0694	-3.67872	3.99871e-168	-0.0283278	0.934699	-0.496364	0.0140735	-4.22832	8.47355e-248	0.793926	3.87942e-05
EF0694	-3.67872	3.99871e-168	-0.0283278	0.934699	-0.496364	0.0140735	-4.22832	8.47355e-248	0.793926	3.87942e-05
EF0694	-3.67872	3.99871e-168	-0.0283278	0.934699	-0.496364	0.0140735	-4.22832	8.47355e-248	0.793926	3.87942e-05
EF0694	-3.67872	3.99871e-168	-0.0283278	0.934699	-0.496364	0.0140735	-4.22832	8.47355e-248	0.793926	3.87942e-05
EF0694	-3.67872	3.99871e-168	-0.0283278	0.934699	-0.496364	0.0140735	-4.22832	8.47355e-248	0.793926	3.87942e-05
EF0695	-2.92221	5.85262e-35	-0.587926	0.0826874	0.101859	0.874198	-4.1601	2.87511e-71	0.204615	0.537435
EF0695	-2.92221	5.85262e-35	-0.587926	0.0826874	0.101859	0.874198	-4.1601	2.87511e-71	0.204615	0.537435
EF0695	-2.92221	5.85262e-35	-0.587926	0.0826874	0.101859	0.874198	-4.1601	2.87511e-71	0.204615	0.537435
EF0695	-2.92221	5.85262e-35	-0.587926	0.0826874	0.101859	0.874198	-4.1601	2.87511e-71	0.204615	0.537435
EF0695	-2.92221	5.85262e-35	-0.587926	0.0826874	0.101859	0.874198	-4.1601	2.87511e-71	0.204615	0.537435
EF0695	-2.92221	5.85262e-35	-0.587926	0.0826874	0.101859	0.874198	-4.1601	2.87511e-71	0.204615	0.537435
EF0696	-2.36705	3.20649e-46	0.128173	0.576789	0.435902	0.0790059	-3.82129	1.76294e-125	0.0460631	0.914292
EF0696	-2.36705	3.20649e-46	0.128173	0.576789	0.435902	0.0790059	-3.82129	1.76294e-125	0.0460631	0.914292
EF0696	-2.36705	3.20649e-46	0.128173	0.576789	0.435902	0.0790059	-3.82129	1.76294e-125	0.0460631	0.914292
EF0696	-2.36705	3.20649e-46	0.128173	0.576789	0.435902	0.0790059	-3.82129	1.76294e-125	0.0460631	0.914292
EF0696	-2.36705	3.20649e-46	0.128173	0.576789	0.435902	0.0790059	-3.82129	1.76294e-125	0.0460631	0.914292
EF0696	-2.36705	3.20649e-46	0.128173	0.576789	0.435902	0.0790059	-3.82129	1.76294e-125	0.0460631	0.914292
EF0697	-0.245557	0.430195	-0.259444	0.402151	0.573608	0.0775958	-0.48509	6.86566e-05	-0.468061	0.00111434
EF0698	-0.41129	6.90518e-08	0.481468	6.32543e-14	-0.322548	1.48596e-05	-0.549791	2.50702e-12	0.687698	3.27111e-18
EF0699	0.317828	0.000496318	0.264486	0.000356885	-0.365475	2.11175e-05	0.702194	2.85573e-15	0.622105	1.56372e-12
EF0700	0.159704	0.0764204	-0.172755	0.0421181	-0.256507	0.00772007	0.138257	0.076948	0.242224	0.00106216
EF0701	0.491234	3.75304e-08	0.178508	0.0263406	0.0732524	0.446275	0.136337	0.0483128	0.126289	0.0783631
EF0702	0.688759	0.00432597	0.169064	0.412669	-0.282039	0.113358	0.81416	2.7631e-05	0.635016	7.25549e-05
EF0703	0.516626	0.00190405	0.535932	0.000143561	-0.135036	0.334108	0.543559	2.21525e-05	0.798673	1.04783e-09
EF0704	0.322104	4.08139e-06	-0.201226	0.00175884	0.119431	0.164259	0.449118	9.24028e-07	-0.318887	0.000388355
EF0705	1.27307	2.86079e-31	-0.910264	1.88283e-48	0.0698825	0.418783	0.729934	2.09868e-14	-0.695819	1.82624e-16
EF0705	1.27307	2.86079e-31	-0.910264	1.88283e-48	0.0698825	0.418783	0.729934	2.09868e-14	-0.695819	1.82624e-16
EF0707	-0.696854	0.00319786	0.871094	0.000795721	-0.0196157	1	-0.413973	0.0864839	0.495847	0.0332779
EF0708	-0.154303	0.34022	0.690945	1.31803e-05	-0.0315133	0.861803	-0.425241	0.00342936	1.05636	2.73473e-12
EF0708	-0.154303	0.34022	0.690945	1.31803e-05	-0.0315133	0.861803	-0.425241	0.00342936	1.05636	2.73473e-12
EF0708	-0.154303	0.34022	0.690945	1.31803e-05	-0.0315133	0.861803	-0.425241	0.00342936	1.05636	2.73473e-12
EF0708	-0.154303	0.34022	0.690945	1.31803e-05	-0.0315133	0.861803	-0.425241	0.00342936	1.05636	2.73473e-12
EF0709	-0.306673	0.126606	0.582544	0.00275848	0.302511	0.131862	-0.0198641	0.860593	0.357191	0.000370342
EF0710	-0.415377	0.0389919	0.448946	0.0250081	0.206541	0.310515	-0.324862	0.00702509	0.306983	0.00598897
EF0711	-1.07412	0.00521498	-2.09786	3.77156e-12	-0.68363	0.0500439	-0.909051	0.00350948	-0.857867	0.000745919
EF0713	-0.840203	0.0012012	-1.53883	4.88822e-14	-0.219258	0.420179	-1.36312	1.91428e-09	-1.43691	9.84902e-15
EF0714	-0.298257	0.13093	-2.18008	1.8091e-67	-0.703887	4.33242e-05	-0.0770645	0.655557	-1.67684	4.51062e-39
EF0714	-0.298257	0.13093	-2.18008	1.8091e-67	-0.703887	4.33242e-05	-0.0770645	0.655557	-1.67684	4.51062e-39
EF0714	-0.298257	0.13093	-2.18008	1.8091e-67	-0.703887	4.33242e-05	-0.0770645	0.655557	-1.67684	4.51062e-39
EF0715	0.313194	0.102599	0.394697	0.0245212	-0.0212901	0.90637	0.247763	0.0180617	0.431598	8.75994e-08
EF0716	-0.210066	0.00340201	0.707044	1.79509e-27	-0.0884718	0.291043	-0.342121	2.03715e-05	0.722915	1.1987e-21
EF0717	-1.60417	7.59413e-63	-0.131754	0.0331625	-0.0758132	0.355525	-1.24303	2.38387e-50	-0.366461	1.76923e-05
EF0718	-0.831108	2.16758e-18	0.521721	5.62518e-15	0.163621	0.0282189	-0.182663	0.0390669	0.0459726	0.537964
EF0719	0.464398	5.12675e-11	0.889141	2.93454e-52	0.225479	0.00261533	1.22758	6.19075e-45	0.560467	1.57865e-14
EF0720	0.297354	3.05165e-05	0.115376	0.0429444	0.118613	0.134866	-0.0845671	0.287942	0.217778	0.00551911
EF0720	0.297354	3.05165e-05	0.115376	0.0429444	0.118613	0.134866	-0.0845671	0.287942	0.217778	0.00551911
EF0720	0.297354	3.05165e-05	0.115376	0.0429444	0.118613	0.134866	-0.0845671	0.287942	0.217778	0.00551911
EF0720	0.297354	3.05165e-05	0.115376	0.0429444	0.118613	0.134866	-0.0845671	0.287942	0.217778	0.00551911
EF0720	0.297354	3.05165e-05	0.115376	0.0429444	0.118613	0.134866	-0.0845671	0.287942	0.217778	0.00551911
EF0720	0.297354	3.05165e-05	0.115376	0.0429444	0.118613	0.134866	-0.0845671	0.287942	0.217778	0.00551911
EF0721	0.0608708	0.708793	1.14316	3.5552e-44	0.0764525	0.651896	0.408645	5.46959e-06	1.007	8.16195e-38
EF0721	0.0608708	0.708793	1.14316	3.5552e-44	0.0764525	0.651896	0.408645	5.46959e-06	1.007	8.16195e-38
EF0721	0.0608708	0.708793	1.14316	3.5552e-44	0.0764525	0.651896	0.408645	5.46959e-06	1.007	8.16195e-38
EF0722	-0.290679	0.086356	0.707724	8.88094e-06	0.038524	0.821841	-0.132956	0.152439	0.657175	1.446e-18
EF0722	-0.290679	0.086356	0.707724	8.88094e-06	0.038524	0.821841	-0.132956	0.152439	0.657175	1.446e-18
EF0722	-0.290679	0.086356	0.707724	8.88094e-06	0.038524	0.821841	-0.132956	0.152439	0.657175	1.446e-18
EF0723	-0.924864	3.04876e-05	1.00153	2.77113e-05	0.0573569	0.799083	-0.937281	8.63327e-10	1.04579	3.66179e-07
EF0724	0.770288	5.28287e-27	-0.173668	0.0419043	0.0148275	0.887082	0.797612	1.26205e-19	-0.191974	0.0236068
EF0725	0.210135	0.258232	-0.0071987	0.969515	0.0321897	0.865332	0.272941	0.00747765	-0.0918841	0.248688
EF0726	0.0696296	0.715709	0.0314578	0.858556	0.0555254	0.776996	0.192066	0.0715198	-0.118997	0.159301
EF0727	-0.0592093	0.753458	-0.0604055	0.750999	0.0652559	0.733123	-0.138186	0.171954	-0.204382	0.00821675
EF0728	0.120704	0.183267	0.434491	1.29366e-07	0.123503	0.224765	0.0219222	0.774332	0.178819	0.0253248
EF0731	-0.583867	7.71078e-06	0.5795	1.03737e-05	0.117001	0.437829	-0.714262	3.47873e-06	0.113947	0.470542
EF0731	-0.583867	7.71078e-06	0.5795	1.03737e-05	0.117001	0.437829	-0.714262	3.47873e-06	0.113947	0.470542
EF0731	-0.583867	7.71078e-06	0.5795	1.03737e-05	0.117001	0.437829	-0.714262	3.47873e-06	0.113947	0.470542
EF0731	-0.583867	7.71078e-06	0.5795	1.03737e-05	0.117001	0.437829	-0.714262	3.47873e-06	0.113947	0.470542
EF0731	-0.583867	7.71078e-06	0.5795	1.03737e-05	0.117001	0.437829	-0.714262	3.47873e-06	0.113947	0.470542
EF0731	-0.583867	7.71078e-06	0.5795	1.03737e-05	0.117001	0.437829	-0.714262	3.47873e-06	0.113947	0.470542
EF0731	-0.583867	7.71078e-06	0.5795	1.03737e-05	0.117001	0.437829	-0.714262	3.47873e-06	0.113947	0.470542
EF0731	-0.583867	7.71078e-06	0.5795	1.03737e-05	0.117001	0.437829	-0.714262	3.47873e-06	0.113947	0.470542
EF0731	-0.583867	7.71078e-06	0.5795	1.03737e-05	0.117001	0.437829	-0.714262	3.47873e-06	0.113947	0.470542
EF0731	-0.583867	7.71078e-06	0.5795	1.03737e-05	0.117001	0.437829	-0.714262	3.47873e-06	0.113947	0.470542
EF0731	-0.583867	7.71078e-06	0.5795	1.03737e-05	0.117001	0.437829	-0.714262	3.47873e-06	0.113947	0.470542
EF0731	-0.583867	7.71078e-06	0.5795	1.03737e-05	0.117001	0.437829	-0.714262	3.47873e-06	0.113947	0.470542
EF0731	-0.583867	7.71078e-06	0.5795	1.03737e-05	0.117001	0.437829	-0.714262	3.47873e-06	0.113947	0.470542
EF0731	-0.583867	7.71078e-06	0.5795	1.03737e-05	0.117001	0.437829	-0.714262	3.47873e-06	0.113947	0.470542
EF0731	-0.583867	7.71078e-06	0.5795	1.03737e-05	0.117001	0.437829	-0.714262	3.47873e-06	0.113947	0.470542
EF0731	-0.583867	7.71078e-06	0.5795	1.03737e-05	0.117001	0.437829	-0.714262	3.47873e-06	0.113947	0.470542
EF0731	-0.583867	7.71078e-06	0.5795	1.03737e-05	0.117001	0.437829	-0.714262	3.47873e-06	0.113947	0.470542
EF0731	-0.583867	7.71078e-06	0.5795	1.03737e-05	0.117001	0.437829	-0.714262	3.47873e-06	0.113947	0.470542
EF0731	-0.583867	7.71078e-06	0.5795	1.03737e-05	0.117001	0.437829	-0.714262	3.47873e-06	0.113947	0.470542
EF0731	-0.583867	7.71078e-06	0.5795	1.03737e-05	0.117001	0.437829	-0.714262	3.47873e-06	0.113947	0.470542
EF0731	-0.583867	7.71078e-06	0.5795	1.03737e-05	0.117001	0.437829	-0.714262	3.47873e-06	0.113947	0.470542
EF0732			-1.48889	1.15727e-05			-0.938832	0.0151954
EF0732			-1.48889	1.15727e-05			-0.938832	0.0151954
EF0732			-1.48889	1.15727e-05			-0.938832	0.0151954
EF0733			-1.34723	1.1881e-05	-0.700435	0.0447009	0.401233	0.292052	-0.198144	0.538505
EF0733			-1.34723	1.1881e-05	-0.700435	0.0447009	0.401233	0.292052	-0.198144	0.538505
EF0733			-1.34723	1.1881e-05	-0.700435	0.0447009	0.401233	0.292052	-0.198144	0.538505
EF0733			-1.34723	1.1881e-05	-0.700435	0.0447009	0.401233	0.292052	-0.198144	0.538505
EF0733			-1.34723	1.1881e-05	-0.700435	0.0447009	0.401233	0.292052	-0.198144	0.538505
EF0733			-1.34723	1.1881e-05	-0.700435	0.0447009	0.401233	0.292052	-0.198144	0.538505
EF0733			-1.34723	1.1881e-05	-0.700435	0.0447009	0.401233	0.292052	-0.198144	0.538505
EF0733			-1.34723	1.1881e-05	-0.700435	0.0447009	0.401233	0.292052	-0.198144	0.538505
EF0733			-1.34723	1.1881e-05	-0.700435	0.0447009	0.401233	0.292052	-0.198144	0.538505
EF0733			-1.34723	1.1881e-05	-0.700435	0.0447009	0.401233	0.292052	-0.198144	0.538505
EF0733			-1.34723	1.1881e-05	-0.700435	0.0447009	0.401233	0.292052	-0.198144	0.538505
EF0733			-1.34723	1.1881e-05	-0.700435	0.0447009	0.401233	0.292052	-0.198144	0.538505
EF0733			-1.34723	1.1881e-05	-0.700435	0.0447009	0.401233	0.292052	-0.198144	0.538505
EF0733			-1.34723	1.1881e-05	-0.700435	0.0447009	0.401233	0.292052	-0.198144	0.538505
EF0733			-1.34723	1.1881e-05	-0.700435	0.0447009	0.401233	0.292052	-0.198144	0.538505
EF0734	-0.12548	0.664314	-0.907703	1.76252e-05	-0.294404	0.245124	-0.286856	0.229585	-0.679732	0.000732661
EF0734	-0.12548	0.664314	-0.907703	1.76252e-05	-0.294404	0.245124	-0.286856	0.229585	-0.679732	0.000732661
EF0734	-0.12548	0.664314	-0.907703	1.76252e-05	-0.294404	0.245124	-0.286856	0.229585	-0.679732	0.000732661
EF0735	0.527897	0.115606	-0.669502	0.00362882	0.156716	0.565134	-0.489803	0.0541362	-0.855722	8.37401e-05
EF0737	0.433105	2.33578e-09	-0.501933	8.62888e-18	0.109962	0.144273	0.404374	1.28913e-06	-0.447301	4.08134e-09
EF0739	0.409533	0.000450509	0.345493	0.000231642	0.201053	0.127076	-0.506477	7.68601e-05	0.456392	0.00125285
EF0740	0.0620544	0.585493	0.275323	5.16645e-05	-0.0216667	0.823653	-0.407764	4.6508e-05	0.532133	6.22278e-08
EF0741	0.0759749	0.62888	-0.246196	0.041675	-0.0498501	0.744987	-0.621545	6.05057e-06	-0.00405111	0.97055
EF0742	0.137325	0.135535	0.122082	0.0909336	0.160539	0.0608522	0.157497	0.0837911	-0.0126806	0.895458
EF0743	-0.536845	1.70059e-07	0.341745	0.00497572	0.381635	0.0168312	-0.775551	3.18e-07	-0.155125	0.363611
EF0744	-0.227937	0.024527	0.143706	0.160438	0.364927	0.00298501	-0.837592	3.07267e-16	0.286671	0.00620461
EF0745	-0.379484	2.47406e-05	0.00101756	0.989145	-0.100725	0.289076	-0.195476	0.0535907	0.195522	0.0409961
EF0746	0.423646	0.0224476	-0.0187803	0.887647	-0.18681	0.186977	0.858393	2.98552e-07	0.41484	0.00296822
EF0746	0.423646	0.0224476	-0.0187803	0.887647	-0.18681	0.186977	0.858393	2.98552e-07	0.41484	0.00296822
EF0746	0.423646	0.0224476	-0.0187803	0.887647	-0.18681	0.186977	0.858393	2.98552e-07	0.41484	0.00296822
EF0747	-0.0838567	0.30638	-0.156734	0.0152481	-0.0106348	0.914547	0.463925	1.44276e-06	-0.180225	0.037493
EF0747	-0.0838567	0.30638	-0.156734	0.0152481	-0.0106348	0.914547	0.463925	1.44276e-06	-0.180225	0.037493
EF0748	-0.21023	0.00109111	0.151132	0.00516389	-0.0271317	0.76525	0.192451	0.0365536	0.355488	3.35481e-05
EF0750	1.58267	1.76061e-37	1.28561	2.44739e-32	-0.396291	0.000972402	2.2609	1.37358e-62	1.07091	4.22706e-20
EF0750	1.58267	1.76061e-37	1.28561	2.44739e-32	-0.396291	0.000972402	2.2609	1.37358e-62	1.07091	4.22706e-20
EF0751	1.69367	7.59003e-95	1.26393	1.49154e-73	-0.319267	0.00356711	2.04341	1.85471e-60	1.0327	2.69031e-20
EF0751	1.69367	7.59003e-95	1.26393	1.49154e-73	-0.319267	0.00356711	2.04341	1.85471e-60	1.0327	2.69031e-20
EF0752	1.71116	3.89515e-92	1.04082	2.26772e-53	-0.368394	0.00408728	2.10277	3.19715e-64	0.80868	1.61691e-12
EF0752	1.71116	3.89515e-92	1.04082	2.26772e-53	-0.368394	0.00408728	2.10277	3.19715e-64	0.80868	1.61691e-12
EF0752	1.71116	3.89515e-92	1.04082	2.26772e-53	-0.368394	0.00408728	2.10277	3.19715e-64	0.80868	1.61691e-12
EF0752	1.71116	3.89515e-92	1.04082	2.26772e-53	-0.368394	0.00408728	2.10277	3.19715e-64	0.80868	1.61691e-12
EF0753	1.58725	1.82195e-55	0.861809	6.3184e-21	-0.408873	0.0263235	2.09864	4.97007e-67	0.700653	8.46899e-11
EF0753	1.58725	1.82195e-55	0.861809	6.3184e-21	-0.408873	0.0263235	2.09864	4.97007e-67	0.700653	8.46899e-11
EF0754	1.50975	2.04053e-100	0.790252	9.01443e-32	-0.321304	0.00412983	1.71364	4.14541e-64	0.553359	5.40711e-10
EF0754	1.50975	2.04053e-100	0.790252	9.01443e-32	-0.321304	0.00412983	1.71364	4.14541e-64	0.553359	5.40711e-10
EF0755	1.41675	5.261e-13	0.971205	1.80257e-10	-0.273065	0.0528436	1.56989	1.70361e-17	0.941225	7.89436e-11
EF0756	1.71467	4.92132e-15	1.11756	7.18421e-12	-0.425635	0.0323594	1.70208	3.55929e-13	1.31908	2.05294e-11
EF0757	1.68285	3.53769e-11	0.352863	0.0515401	-0.322483	0.0593666	0.856023	0.000139885	1.13237	7.34984e-10
EF0758	-1.16786	7.38971e-11	1.77424	1.79416e-99	0.1158	0.493769	-0.430454	6.6467e-06	1.3814	3.5954e-73
EF0758	-1.16786	7.38971e-11	1.77424	1.79416e-99	0.1158	0.493769	-0.430454	6.6467e-06	1.3814	3.5954e-73
EF0758	-1.16786	7.38971e-11	1.77424	1.79416e-99	0.1158	0.493769	-0.430454	6.6467e-06	1.3814	3.5954e-73
EF0758	-1.16786	7.38971e-11	1.77424	1.79416e-99	0.1158	0.493769	-0.430454	6.6467e-06	1.3814	3.5954e-73
EF0758	-1.16786	7.38971e-11	1.77424	1.79416e-99	0.1158	0.493769	-0.430454	6.6467e-06	1.3814	3.5954e-73
EF0758	-1.16786	7.38971e-11	1.77424	1.79416e-99	0.1158	0.493769	-0.430454	6.6467e-06	1.3814	3.5954e-73
EF0758	-1.16786	7.38971e-11	1.77424	1.79416e-99	0.1158	0.493769	-0.430454	6.6467e-06	1.3814	3.5954e-73
EF0758	-1.16786	7.38971e-11	1.77424	1.79416e-99	0.1158	0.493769	-0.430454	6.6467e-06	1.3814	3.5954e-73
EF0758	-1.16786	7.38971e-11	1.77424	1.79416e-99	0.1158	0.493769	-0.430454	6.6467e-06	1.3814	3.5954e-73
EF0758	-1.16786	7.38971e-11	1.77424	1.79416e-99	0.1158	0.493769	-0.430454	6.6467e-06	1.3814	3.5954e-73
EF0758	-1.16786	7.38971e-11	1.77424	1.79416e-99	0.1158	0.493769	-0.430454	6.6467e-06	1.3814	3.5954e-73
EF0758	-1.16786	7.38971e-11	1.77424	1.79416e-99	0.1158	0.493769	-0.430454	6.6467e-06	1.3814	3.5954e-73
EF0759	-1.10445	3.88664e-36	1.76352	1.29885e-93	0.195537	0.0474403	-0.627309	4.61719e-17	1.31497	1.35415e-66
EF0759	-1.10445	3.88664e-36	1.76352	1.29885e-93	0.195537	0.0474403	-0.627309	4.61719e-17	1.31497	1.35415e-66
EF0760	-0.10754	0.547673	0.0178771	0.918968	0.229999	0.198061	-0.425968	2.79677e-05	-0.271747	0.000624953
EF0760	-0.10754	0.547673	0.0178771	0.918968	0.229999	0.198061	-0.425968	2.79677e-05	-0.271747	0.000624953
EF0760	-0.10754	0.547673	0.0178771	0.918968	0.229999	0.198061	-0.425968	2.79677e-05	-0.271747	0.000624953
EF0760	-0.10754	0.547673	0.0178771	0.918968	0.229999	0.198061	-0.425968	2.79677e-05	-0.271747	0.000624953
EF0761	0.651412	0.000268198	0.0999544	0.576571	0.223343	0.224223	0.499407	1.92375e-06	0.108682	0.167938
EF0761	0.651412	0.000268198	0.0999544	0.576571	0.223343	0.224223	0.499407	1.92375e-06	0.108682	0.167938
EF0761	0.651412	0.000268198	0.0999544	0.576571	0.223343	0.224223	0.499407	1.92375e-06	0.108682	0.167938
EF0761	0.651412	0.000268198	0.0999544	0.576571	0.223343	0.224223	0.499407	1.92375e-06	0.108682	0.167938
EF0762	0.183509	0.00556529	0.945538	1.56167e-58	-0.643871	8.47436e-11	-0.294534	6.36253e-05	1.52659	9.0071e-96
EF0762	0.183509	0.00556529	0.945538	1.56167e-58	-0.643871	8.47436e-11	-0.294534	6.36253e-05	1.52659	9.0071e-96
EF0762	0.183509	0.00556529	0.945538	1.56167e-58	-0.643871	8.47436e-11	-0.294534	6.36253e-05	1.52659	9.0071e-96
EF0762	0.183509	0.00556529	0.945538	1.56167e-58	-0.643871	8.47436e-11	-0.294534	6.36253e-05	1.52659	9.0071e-96
EF0763	-0.105692	0.252594	0.0694569	0.414966	-0.860027	5.15461e-14	-0.910619	6.16313e-21	0.904357	2.34232e-37
EF0763	-0.105692	0.252594	0.0694569	0.414966	-0.860027	5.15461e-14	-0.910619	6.16313e-21	0.904357	2.34232e-37
EF0763	-0.105692	0.252594	0.0694569	0.414966	-0.860027	5.15461e-14	-0.910619	6.16313e-21	0.904357	2.34232e-37
EF0763	-0.105692	0.252594	0.0694569	0.414966	-0.860027	5.15461e-14	-0.910619	6.16313e-21	0.904357	2.34232e-37
EF0764	1.4526	4.52928e-20	-1.97154	4.87528e-129	-0.369016	0.00150482	1.24943	3.12261e-21	-1.37741	3.58537e-49
EF0764	1.4526	4.52928e-20	-1.97154	4.87528e-129	-0.369016	0.00150482	1.24943	3.12261e-21	-1.37741	3.58537e-49
EF0764	1.4526	4.52928e-20	-1.97154	4.87528e-129	-0.369016	0.00150482	1.24943	3.12261e-21	-1.37741	3.58537e-49
EF0764	1.4526	4.52928e-20	-1.97154	4.87528e-129	-0.369016	0.00150482	1.24943	3.12261e-21	-1.37741	3.58537e-49
EF0764	1.4526	4.52928e-20	-1.97154	4.87528e-129	-0.369016	0.00150482	1.24943	3.12261e-21	-1.37741	3.58537e-49
EF0764	1.4526	4.52928e-20	-1.97154	4.87528e-129	-0.369016	0.00150482	1.24943	3.12261e-21	-1.37741	3.58537e-49
EF0764	1.4526	4.52928e-20	-1.97154	4.87528e-129	-0.369016	0.00150482	1.24943	3.12261e-21	-1.37741	3.58537e-49
EF0766	-0.597792	3.90177e-11	0.0281855	0.729969	-0.0243844	0.80948	-0.524975	6.62544e-12	-0.0807349	0.295732
EF0766	-0.597792	3.90177e-11	0.0281855	0.729969	-0.0243844	0.80948	-0.524975	6.62544e-12	-0.0807349	0.295732
EF0767	-0.757687	2.08974e-17	-0.210005	0.0108722	-0.0628648	0.517996	-0.548568	1.82162e-14	-0.288437	6.34854e-05
EF0767	-0.757687	2.08974e-17	-0.210005	0.0108722	-0.0628648	0.517996	-0.548568	1.82162e-14	-0.288437	6.34854e-05
EF0768	-0.849649	1.07391e-20	-0.482105	1.53183e-08	0.0179766	0.873079	-0.931549	2.02031e-28	-0.465474	3.35241e-08
EF0768	-0.849649	1.07391e-20	-0.482105	1.53183e-08	0.0179766	0.873079	-0.931549	2.02031e-28	-0.465474	3.35241e-08
EF0769	-0.757025	2.24652e-15	1.1658	1.84273e-66	0.111029	0.181012	-1.09882	4.10352e-49	0.789047	4.2148e-23
EF0769	-0.757025	2.24652e-15	1.1658	1.84273e-66	0.111029	0.181012	-1.09882	4.10352e-49	0.789047	4.2148e-23
EF0769	-0.757025	2.24652e-15	1.1658	1.84273e-66	0.111029	0.181012	-1.09882	4.10352e-49	0.789047	4.2148e-23
EF0769	-0.757025	2.24652e-15	1.1658	1.84273e-66	0.111029	0.181012	-1.09882	4.10352e-49	0.789047	4.2148e-23
EF0769	-0.757025	2.24652e-15	1.1658	1.84273e-66	0.111029	0.181012	-1.09882	4.10352e-49	0.789047	4.2148e-23
EF0769	-0.757025	2.24652e-15	1.1658	1.84273e-66	0.111029	0.181012	-1.09882	4.10352e-49	0.789047	4.2148e-23
EF0769	-0.757025	2.24652e-15	1.1658	1.84273e-66	0.111029	0.181012	-1.09882	4.10352e-49	0.789047	4.2148e-23
EF0769	-0.757025	2.24652e-15	1.1658	1.84273e-66	0.111029	0.181012	-1.09882	4.10352e-49	0.789047	4.2148e-23
EF0769	-0.757025	2.24652e-15	1.1658	1.84273e-66	0.111029	0.181012	-1.09882	4.10352e-49	0.789047	4.2148e-23
EF0769	-0.757025	2.24652e-15	1.1658	1.84273e-66	0.111029	0.181012	-1.09882	4.10352e-49	0.789047	4.2148e-23
EF0769	-0.757025	2.24652e-15	1.1658	1.84273e-66	0.111029	0.181012	-1.09882	4.10352e-49	0.789047	4.2148e-23
EF0769	-0.757025	2.24652e-15	1.1658	1.84273e-66	0.111029	0.181012	-1.09882	4.10352e-49	0.789047	4.2148e-23
EF0770	-0.274379	0.00980472	-0.13176	0.400784	-0.0253807	0.823156	0.282577	0.000205439	-0.215623	0.00770518
EF0770	-0.274379	0.00980472	-0.13176	0.400784	-0.0253807	0.823156	0.282577	0.000205439	-0.215623	0.00770518
EF0770	-0.274379	0.00980472	-0.13176	0.400784	-0.0253807	0.823156	0.282577	0.000205439	-0.215623	0.00770518
EF0770	-0.274379	0.00980472	-0.13176	0.400784	-0.0253807	0.823156	0.282577	0.000205439	-0.215623	0.00770518
EF0771	-0.378973	0.0288387	0.0148276	0.930622	0.0158852	0.92795	-0.51144	1.98797e-07	-0.1396	0.0621932
EF0773	0.277641	0.035247	0.838119	1.70987e-20	-0.0786516	0.443904	0.574936	3.32745e-07	1.17682	1.22115e-32
EF0774	2.06398	2.24438e-08	0.20798	0.385065	0.0874733	0.749905	1.8903	3.04005e-07	0.397335	0.103811
EF0775	0.529745	0.000191877	-0.619103	2.78185e-10	-0.181973	0.142755	0.537047	0.000112064	-0.262382	0.0188465
EF0776			-1.74436	5.83415e-06			-0.422335	0.250404	-0.482174	0.128092
EF0778	-0.191176	0.25024	-0.56175	1.69363e-11	0.370648	0.0146348	-0.112088	0.620335	-0.490973	0.000455976
EF0779	0.193308	0.0344378	-0.340904	0.0325029	0.0422102	0.661893	0.511531	1.46084e-12	-0.467238	1.17907e-09
EF0780	0.213474	0.0203185	-0.383348	2.63344e-12	0.0709008	0.375534	0.280035	0.000638245	-0.455198	5.95277e-10
EF0781	0.760146	2.90202e-16	-0.524626	1.22974e-10	0.139671	0.145059	-0.0964757	0.178688	-0.526508	2.63809e-12
EF0782	0.535743	3.75202e-08	0.679682	1.3047e-23	0.0463524	0.616466	0.662047	3.3348e-11	0.693623	3.22997e-12
EF0783	0.306659	2.41828e-06	-0.481454	8.21074e-19	-0.0934884	0.209292	0.0532138	0.485625	-0.228151	0.00193221
EF0783	0.306659	2.41828e-06	-0.481454	8.21074e-19	-0.0934884	0.209292	0.0532138	0.485625	-0.228151	0.00193221
EF0784	-0.320674	0.0764354	0.711413	4.14929e-05	-0.026285	0.884998	-0.361451	0.000375969	0.578672	3.59265e-12
EF0785	-0.12852	0.148889	0.401309	7.47466e-07	0.189432	0.053981	0.23608	0.00341595	0.252162	0.000265709
EF0786	-0.24929	0.0120535	0.295158	0.000831702	0.266158	0.00982937	-0.342528	3.14462e-06	0.0379479	0.575159
EF0787	0.0522043	0.775862	-0.443164	0.00174295	-0.474655	0.00131597	0.717371	6.5186e-08	0.232361	0.0335295
EF0787	0.0522043	0.775862	-0.443164	0.00174295	-0.474655	0.00131597	0.717371	6.5186e-08	0.232361	0.0335295
EF0789	0.0863638	0.226161	0.552524	9.05711e-17	-0.146352	0.0674385	0.269923	0.00173297	0.748063	3.31781e-20
EF0790	-0.109486	0.244371	0.548933	1.17163e-10	-0.0793559	0.425993	-0.217811	0.00520459	0.539836	5.50546e-14
EF0791	0.18693	0.0089261	-0.470275	2.25275e-08	0.101087	0.1848	0.0557292	0.502923	-0.387324	7.1202e-08
EF0792	-0.00819048	0.921351	0.195211	0.00285297	0.14743	0.0705641	0.514452	2.53455e-09	0.0117309	0.887292
EF0792	-0.00819048	0.921351	0.195211	0.00285297	0.14743	0.0705641	0.514452	2.53455e-09	0.0117309	0.887292
EF0793	-0.464535	9.16612e-05	-0.218551	0.00383814	0.0366367	0.730455	-0.119024	0.252074	-0.208305	0.0326971
EF0793	-0.464535	9.16612e-05	-0.218551	0.00383814	0.0366367	0.730455	-0.119024	0.252074	-0.208305	0.0326971
EF0794	0.0797627	0.305626	-0.545407	1.76387e-17	-0.164674	0.0617863	0.148623	0.0895123	-0.346033	3.5469e-05
EF0795	0.158913	0.107036	-0.505331	2.07945e-09	-0.137459	0.181798	0.218549	0.00909107	-0.244469	0.00144114
EF0796	0.185799	0.144809	-0.935369	3.75128e-22	0.0087903	0.9588	0.0756169	0.546423	-0.449249	2.37766e-06
EF0797	-0.120378	0.0904616	0.231586	5.40014e-05	-0.042392	0.561874	0.228514	0.00531545	0.129217	0.095321
EF0798	0.352349	0.000464728	0.423111	4.61924e-08	-0.110059	0.242413	0.668979	3.27088e-09	0.50093	2.51633e-07
EF0799	0.40728	0.0218325	-0.504549	0.0064174	0.381566	0.0349932	-0.0421315	0.662578	-0.795037	1.5504e-24
EF0801	-0.0159508	0.926966	-0.0808036	0.64329	-0.0381359	0.831066	0.0181255	0.857817	-0.156311	0.0466523
EF0802	0.413395	0.112089	0.613364	0.00793409	0.0239208	0.916236	0.25308	0.296711	0.874298	0.000184768
EF0803	0.473641	0.0201973	0.882441	1.32906e-07	0.0195782	0.924544	0.683167	0.000192409	0.93305	7.60344e-09
EF0803	0.473641	0.0201973	0.882441	1.32906e-07	0.0195782	0.924544	0.683167	0.000192409	0.93305	7.60344e-09
EF0803	0.473641	0.0201973	0.882441	1.32906e-07	0.0195782	0.924544	0.683167	0.000192409	0.93305	7.60344e-09
EF0803	0.473641	0.0201973	0.882441	1.32906e-07	0.0195782	0.924544	0.683167	0.000192409	0.93305	7.60344e-09
EF0804	-0.452294	0.000141721	-0.314772	0.00259383	-0.142065	0.292237	-0.581149	9.90315e-06	-0.194325	0.108289
EF0805	-0.302268	0.0226598	0.0163916	0.941405	0.00827441	0.971552	-0.382493	0.00640436	-0.00867943	0.945691
EF0806	0.000264576	1	-0.0907598	0.652739	-0.176224	0.485274	-0.260371	0.319696	0.00804181	1
EF0807	-0.257593	0.00358628	-0.263987	0.00125473	0.209446	0.0334126	0.0545916	0.48442	-0.630025	1.1061e-17
EF0809	-0.641053	0.000151805	-0.795208	3.9686e-06	0.244345	0.0414786	-0.483469	4.5397e-07	-1.11391	2.63813e-38
EF0810	0.318468	0.0636644	-0.885393	1.39504e-13	0.0800011	0.614929	0.418742	0.0214991	-0.679166	2.90911e-07
EF0811	-0.096235	0.625722	-1.02942	2.7827e-11	0.16791	0.309519	-0.258186	0.0946436	-1.16449	2.37359e-23
EF0812	-0.222882	0.2114	-0.19148	0.255604	0.0787083	0.658188	-0.28553	0.0436599	-0.476607	0.000324643
EF0814	0.12674	0.538553	-0.501	0.000251604	-0.337245	0.0268077	0.292427	0.0832654	-0.108754	0.419067
EF0816	-0.563189	0.10037	0.694926	0.0408021	0.649324	0.0707946	-0.796822	0.0135054	-4.11953e-05	1
EF0816	-0.563189	0.10037	0.694926	0.0408021	0.649324	0.0707946	-0.796822	0.0135054	-4.11953e-05	1
EF0817	-0.149531	0.682283
EF0818	0.733679	0.0621882	-0.901748	0.000677299	-0.86516	0.00118795	0.0632649	0.823909	-0.0215489	0.963766
EF0818	0.733679	0.0621882	-0.901748	0.000677299	-0.86516	0.00118795	0.0632649	0.823909	-0.0215489	0.963766
EF0818	0.733679	0.0621882	-0.901748	0.000677299	-0.86516	0.00118795	0.0632649	0.823909	-0.0215489	0.963766
EF0819	-0.416167	1.06952e-06	-0.274462	0.000617036	0.138096	0.122941	-0.751372	3.97773e-10	-0.464109	1.15124e-07
EF0820	-0.679428	0.000494402	0.189985	0.316276	0.151359	0.43348	-0.730119	2.88995e-11	-0.138264	0.138322
EF0822	-0.134601	0.0884938	-0.356809	3.15944e-10	-0.150803	0.0417326	-0.0642041	0.424362	-0.22831	0.0042481
EF0823	0.150911	0.4477	-0.698662	1.55263e-07	0.151203	0.409086	-0.0710985	0.717676	-0.889014	6.88881e-10
EF0824	0.486916	0.00104198	-0.296006	0.00254331	0.15944	0.182134	0.226849	0.0627274	-0.357995	0.000553796
EF0825	0.957949	7.64929e-09	0.135972	0.196837	-0.377756	0.00133239	0.623726	5.63349e-08	1.13384	7.62667e-24
EF0827	-0.24669	0.00265728	0.282569	0.000441455	0.278188	0.00186942	0.0387077	0.693969	-0.0685343	0.465055
EF0828	-0.546053	9.62358e-07	0.674556	2.07399e-10	0.124268	0.325916	0.0903961	0.501131	0.287349	0.0241977
EF0829	-0.90863	5.77113e-06	0.324149	0.122798	-0.00114629	1	-0.161472	0.416881	-0.0201679	0.928653
EF0830	-1.06962	2.26789e-08	0.329562	0.127805	0.188712	0.335104	-0.628811	0.000178049	-0.296652	0.0786056
EF0830	-1.06962	2.26789e-08	0.329562	0.127805	0.188712	0.335104	-0.628811	0.000178049	-0.296652	0.0786056
EF0831	-1.20917	4.76757e-11	0.462922	0.0333197	0.328663	0.137209	-0.898621	1.41786e-05	-0.0317369	0.914881
EF0832	-1.68741	2.56136e-13	0.464102	0.0508864	-0.0772862	0.75997	-1.26501	1.45834e-10	0.389469	0.0565968
EF0833	-1.79814	3.76902e-17	0.365936	0.183247	0.359157	0.333496	-1.68594	1.26173e-08	-0.239393	0.504408
EF0833	-1.79814	3.76902e-17	0.365936	0.183247	0.359157	0.333496	-1.68594	1.26173e-08	-0.239393	0.504408
EF0833	-1.79814	3.76902e-17	0.365936	0.183247	0.359157	0.333496	-1.68594	1.26173e-08	-0.239393	0.504408
EF0833	-1.79814	3.76902e-17	0.365936	0.183247	0.359157	0.333496	-1.68594	1.26173e-08	-0.239393	0.504408
EF0833	-1.79814	3.76902e-17	0.365936	0.183247	0.359157	0.333496	-1.68594	1.26173e-08	-0.239393	0.504408
EF0834	-0.355255	0.068009	-0.0116324	0.953595	-0.245592	0.148265	-0.449234	0.00879826	0.544805	0.000538579
EF0834	-0.355255	0.068009	-0.0116324	0.953595	-0.245592	0.148265	-0.449234	0.00879826	0.544805	0.000538579
EF0834	-0.355255	0.068009	-0.0116324	0.953595	-0.245592	0.148265	-0.449234	0.00879826	0.544805	0.000538579
EF0834	-0.355255	0.068009	-0.0116324	0.953595	-0.245592	0.148265	-0.449234	0.00879826	0.544805	0.000538579
EF0834	-0.355255	0.068009	-0.0116324	0.953595	-0.245592	0.148265	-0.449234	0.00879826	0.544805	0.000538579
EF0835	-0.318704	0.364133	-0.219842	0.455298	-0.238258	0.438014	-0.137758	0.62017	0.372534	0.278114
EF0836	-0.280067	0.100963	0.446937	0.00511159	0.0305133	0.87213	-0.447368	0.0344913	0.213983	0.193473
EF0837	-0.0469436	0.751715	0.185739	0.178075	-0.0534264	0.713089	-0.0063503	0.973774	0.276474	0.0282918
EF0840	-0.20036	0.135483	-0.145006	0.13596	0.0789519	0.515871	-0.488323	8.19253e-05	-0.253723	0.0231366
EF0841	0.0951565	0.202221	-0.709034	5.60471e-17	-0.0532715	0.595971	0.481289	3.05742e-09	-0.496021	3.77091e-11
EF0841	0.0951565	0.202221	-0.709034	5.60471e-17	-0.0532715	0.595971	0.481289	3.05742e-09	-0.496021	3.77091e-11
EF0841	0.0951565	0.202221	-0.709034	5.60471e-17	-0.0532715	0.595971	0.481289	3.05742e-09	-0.496021	3.77091e-11
EF0842	-0.077231	0.438117	-0.80402	8.33561e-41	-0.000917412	0.986817	0.139387	0.0847671	-0.619318	6.4309e-18
EF0843	0.0925258	0.374824	-0.422208	0.00907997	0.0312569	0.850394	-0.0577356	0.497752	-0.303585	3.96449e-05
EF0845	0.022617	0.825381	0.620782	1.15628e-11	-0.0712123	0.516381	-0.155451	0.073597	0.78786	5.47682e-23
EF0846	-0.120067	0.500362	-0.625924	0.000540108	-0.0836994	0.640189	-0.29376	0.00302187	-0.440792	2.68409e-08
EF0848	1.28462	9.66528e-11	-0.214454	0.112128	-0.371959	0.0118555	1.0049	1.28776e-08	0.490558	0.000418962
EF0848	1.28462	9.66528e-11	-0.214454	0.112128	-0.371959	0.0118555	1.0049	1.28776e-08	0.490558	0.000418962
EF0848	1.28462	9.66528e-11	-0.214454	0.112128	-0.371959	0.0118555	1.0049	1.28776e-08	0.490558	0.000418962
EF0848	1.28462	9.66528e-11	-0.214454	0.112128	-0.371959	0.0118555	1.0049	1.28776e-08	0.490558	0.000418962
EF0848	1.28462	9.66528e-11	-0.214454	0.112128	-0.371959	0.0118555	1.0049	1.28776e-08	0.490558	0.000418962
EF0848	1.28462	9.66528e-11	-0.214454	0.112128	-0.371959	0.0118555	1.0049	1.28776e-08	0.490558	0.000418962
EF0849	0.936608	1.323e-30	0.342191	5.73637e-07	0.0109331	0.900149	0.927786	2.18973e-22	0.433864	2.14539e-06
EF0849	0.936608	1.323e-30	0.342191	5.73637e-07	0.0109331	0.900149	0.927786	2.18973e-22	0.433864	2.14539e-06
EF0849	0.936608	1.323e-30	0.342191	5.73637e-07	0.0109331	0.900149	0.927786	2.18973e-22	0.433864	2.14539e-06
EF0849	0.936608	1.323e-30	0.342191	5.73637e-07	0.0109331	0.900149	0.927786	2.18973e-22	0.433864	2.14539e-06
EF0849	0.936608	1.323e-30	0.342191	5.73637e-07	0.0109331	0.900149	0.927786	2.18973e-22	0.433864	2.14539e-06
EF0849	0.936608	1.323e-30	0.342191	5.73637e-07	0.0109331	0.900149	0.927786	2.18973e-22	0.433864	2.14539e-06
EF0850	1.019	8.58671e-06	0.400081	0.0292125	-0.0582151	0.778626	0.885435	0.000277727	0.694964	1.28532e-05
EF0850	1.019	8.58671e-06	0.400081	0.0292125	-0.0582151	0.778626	0.885435	0.000277727	0.694964	1.28532e-05
EF0850	1.019	8.58671e-06	0.400081	0.0292125	-0.0582151	0.778626	0.885435	0.000277727	0.694964	1.28532e-05
EF0850	1.019	8.58671e-06	0.400081	0.0292125	-0.0582151	0.778626	0.885435	0.000277727	0.694964	1.28532e-05
EF0850	1.019	8.58671e-06	0.400081	0.0292125	-0.0582151	0.778626	0.885435	0.000277727	0.694964	1.28532e-05
EF0850	1.019	8.58671e-06	0.400081	0.0292125	-0.0582151	0.778626	0.885435	0.000277727	0.694964	1.28532e-05
EF0852	1.5169	0.000212126	-1.33861	7.04088e-09	-0.0987569	0.771284	0.940246	0.011225	-0.716438	0.00298156
EF0852	1.5169	0.000212126	-1.33861	7.04088e-09	-0.0987569	0.771284	0.940246	0.011225	-0.716438	0.00298156
EF0852	1.5169	0.000212126	-1.33861	7.04088e-09	-0.0987569	0.771284	0.940246	0.011225	-0.716438	0.00298156
EF0852	1.5169	0.000212126	-1.33861	7.04088e-09	-0.0987569	0.771284	0.940246	0.011225	-0.716438	0.00298156
EF0852	1.5169	0.000212126	-1.33861	7.04088e-09	-0.0987569	0.771284	0.940246	0.011225	-0.716438	0.00298156
EF0852	1.5169	0.000212126	-1.33861	7.04088e-09	-0.0987569	0.771284	0.940246	0.011225	-0.716438	0.00298156
EF0852	1.5169	0.000212126	-1.33861	7.04088e-09	-0.0987569	0.771284	0.940246	0.011225	-0.716438	0.00298156
EF0852	1.5169	0.000212126	-1.33861	7.04088e-09	-0.0987569	0.771284	0.940246	0.011225	-0.716438	0.00298156
EF0853			-1.67149	6.84215e-07					-1.36886	9.27287e-05
EF0853			-1.67149	6.84215e-07					-1.36886	9.27287e-05
EF0853			-1.67149	6.84215e-07					-1.36886	9.27287e-05
EF0853			-1.67149	6.84215e-07					-1.36886	9.27287e-05
EF0853			-1.67149	6.84215e-07					-1.36886	9.27287e-05
EF0853			-1.67149	6.84215e-07					-1.36886	9.27287e-05
EF0853			-1.67149	6.84215e-07					-1.36886	9.27287e-05
EF0853			-1.67149	6.84215e-07					-1.36886	9.27287e-05
EF0854	0.479538	0.0834862	-1.47035	9.54796e-18	0.146211	0.63657	0.0953524	0.745371	-1.43941	7.23147e-12
EF0855	1.34639	3.43127e-05	-0.962995	2.41384e-07	-0.319639	0.190588	1.04769	1.65144e-06	-0.0661243	0.718927
EF0855	1.34639	3.43127e-05	-0.962995	2.41384e-07	-0.319639	0.190588	1.04769	1.65144e-06	-0.0661243	0.718927
EF0855	1.34639	3.43127e-05	-0.962995	2.41384e-07	-0.319639	0.190588	1.04769	1.65144e-06	-0.0661243	0.718927
EF0855	1.34639	3.43127e-05	-0.962995	2.41384e-07	-0.319639	0.190588	1.04769	1.65144e-06	-0.0661243	0.718927
EF0855	1.34639	3.43127e-05	-0.962995	2.41384e-07	-0.319639	0.190588	1.04769	1.65144e-06	-0.0661243	0.718927
EF0855	1.34639	3.43127e-05	-0.962995	2.41384e-07	-0.319639	0.190588	1.04769	1.65144e-06	-0.0661243	0.718927
EF0855	1.34639	3.43127e-05	-0.962995	2.41384e-07	-0.319639	0.190588	1.04769	1.65144e-06	-0.0661243	0.718927
EF0855	1.34639	3.43127e-05	-0.962995	2.41384e-07	-0.319639	0.190588	1.04769	1.65144e-06	-0.0661243	0.718927
EF0855	1.34639	3.43127e-05	-0.962995	2.41384e-07	-0.319639	0.190588	1.04769	1.65144e-06	-0.0661243	0.718927
EF0855	1.34639	3.43127e-05	-0.962995	2.41384e-07	-0.319639	0.190588	1.04769	1.65144e-06	-0.0661243	0.718927
EF0855	1.34639	3.43127e-05	-0.962995	2.41384e-07	-0.319639	0.190588	1.04769	1.65144e-06	-0.0661243	0.718927
EF0855	1.34639	3.43127e-05	-0.962995	2.41384e-07	-0.319639	0.190588	1.04769	1.65144e-06	-0.0661243	0.718927
EF0855	1.34639	3.43127e-05	-0.962995	2.41384e-07	-0.319639	0.190588	1.04769	1.65144e-06	-0.0661243	0.718927
EF0855	1.34639	3.43127e-05	-0.962995	2.41384e-07	-0.319639	0.190588	1.04769	1.65144e-06	-0.0661243	0.718927
EF0855	1.34639	3.43127e-05	-0.962995	2.41384e-07	-0.319639	0.190588	1.04769	1.65144e-06	-0.0661243	0.718927
EF0855	1.34639	3.43127e-05	-0.962995	2.41384e-07	-0.319639	0.190588	1.04769	1.65144e-06	-0.0661243	0.718927
EF0855	1.34639	3.43127e-05	-0.962995	2.41384e-07	-0.319639	0.190588	1.04769	1.65144e-06	-0.0661243	0.718927
EF0855	1.34639	3.43127e-05	-0.962995	2.41384e-07	-0.319639	0.190588	1.04769	1.65144e-06	-0.0661243	0.718927
EF0855	1.34639	3.43127e-05	-0.962995	2.41384e-07	-0.319639	0.190588	1.04769	1.65144e-06	-0.0661243	0.718927
EF0855	1.34639	3.43127e-05	-0.962995	2.41384e-07	-0.319639	0.190588	1.04769	1.65144e-06	-0.0661243	0.718927
EF0855	1.34639	3.43127e-05	-0.962995	2.41384e-07	-0.319639	0.190588	1.04769	1.65144e-06	-0.0661243	0.718927
EF0855	1.34639	3.43127e-05	-0.962995	2.41384e-07	-0.319639	0.190588	1.04769	1.65144e-06	-0.0661243	0.718927
EF0855	1.34639	3.43127e-05	-0.962995	2.41384e-07	-0.319639	0.190588	1.04769	1.65144e-06	-0.0661243	0.718927
EF0855	1.34639	3.43127e-05	-0.962995	2.41384e-07	-0.319639	0.190588	1.04769	1.65144e-06	-0.0661243	0.718927
EF0855	1.34639	3.43127e-05	-0.962995	2.41384e-07	-0.319639	0.190588	1.04769	1.65144e-06	-0.0661243	0.718927
EF0855	1.34639	3.43127e-05	-0.962995	2.41384e-07	-0.319639	0.190588	1.04769	1.65144e-06	-0.0661243	0.718927
EF0855	1.34639	3.43127e-05	-0.962995	2.41384e-07	-0.319639	0.190588	1.04769	1.65144e-06	-0.0661243	0.718927
EF0855	1.34639	3.43127e-05	-0.962995	2.41384e-07	-0.319639	0.190588	1.04769	1.65144e-06	-0.0661243	0.718927
EF0855	1.34639	3.43127e-05	-0.962995	2.41384e-07	-0.319639	0.190588	1.04769	1.65144e-06	-0.0661243	0.718927
EF0855	1.34639	3.43127e-05	-0.962995	2.41384e-07	-0.319639	0.190588	1.04769	1.65144e-06	-0.0661243	0.718927
EF0855	1.34639	3.43127e-05	-0.962995	2.41384e-07	-0.319639	0.190588	1.04769	1.65144e-06	-0.0661243	0.718927
EF0855	1.34639	3.43127e-05	-0.962995	2.41384e-07	-0.319639	0.190588	1.04769	1.65144e-06	-0.0661243	0.718927
EF0855	1.34639	3.43127e-05	-0.962995	2.41384e-07	-0.319639	0.190588	1.04769	1.65144e-06	-0.0661243	0.718927
EF0855	1.34639	3.43127e-05	-0.962995	2.41384e-07	-0.319639	0.190588	1.04769	1.65144e-06	-0.0661243	0.718927
EF0855	1.34639	3.43127e-05	-0.962995	2.41384e-07	-0.319639	0.190588	1.04769	1.65144e-06	-0.0661243	0.718927
EF0855	1.34639	3.43127e-05	-0.962995	2.41384e-07	-0.319639	0.190588	1.04769	1.65144e-06	-0.0661243	0.718927
EF0855	1.34639	3.43127e-05	-0.962995	2.41384e-07	-0.319639	0.190588	1.04769	1.65144e-06	-0.0661243	0.718927
EF0855	1.34639	3.43127e-05	-0.962995	2.41384e-07	-0.319639	0.190588	1.04769	1.65144e-06	-0.0661243	0.718927
EF0855	1.34639	3.43127e-05	-0.962995	2.41384e-07	-0.319639	0.190588	1.04769	1.65144e-06	-0.0661243	0.718927
EF0855	1.34639	3.43127e-05	-0.962995	2.41384e-07	-0.319639	0.190588	1.04769	1.65144e-06	-0.0661243	0.718927
EF0855	1.34639	3.43127e-05	-0.962995	2.41384e-07	-0.319639	0.190588	1.04769	1.65144e-06	-0.0661243	0.718927
EF0855	1.34639	3.43127e-05	-0.962995	2.41384e-07	-0.319639	0.190588	1.04769	1.65144e-06	-0.0661243	0.718927
EF0855	1.34639	3.43127e-05	-0.962995	2.41384e-07	-0.319639	0.190588	1.04769	1.65144e-06	-0.0661243	0.718927
EF0855	1.34639	3.43127e-05	-0.962995	2.41384e-07	-0.319639	0.190588	1.04769	1.65144e-06	-0.0661243	0.718927
EF0855	1.34639	3.43127e-05	-0.962995	2.41384e-07	-0.319639	0.190588	1.04769	1.65144e-06	-0.0661243	0.718927
EF0855	1.34639	3.43127e-05	-0.962995	2.41384e-07	-0.319639	0.190588	1.04769	1.65144e-06	-0.0661243	0.718927
EF0855	1.34639	3.43127e-05	-0.962995	2.41384e-07	-0.319639	0.190588	1.04769	1.65144e-06	-0.0661243	0.718927
EF0855	1.34639	3.43127e-05	-0.962995	2.41384e-07	-0.319639	0.190588	1.04769	1.65144e-06	-0.0661243	0.718927
EF0855	1.34639	3.43127e-05	-0.962995	2.41384e-07	-0.319639	0.190588	1.04769	1.65144e-06	-0.0661243	0.718927
EF0856	0.877176	1.27034e-09	0.0421839	0.679221	0.122376	0.32219	1.35344	2.53633e-15	0.141615	0.247836
EF0857	-0.179237	0.00799978	0.576748	1.87045e-22	0.275332	0.00101422	-0.537099	3.64701e-09	0.304467	0.000401048
EF0858	-0.32411	0.000188007	0.517748	1.4125e-10	-0.0825928	0.394876	0.0141516	0.848784	0.586124	2.95966e-15
EF0858	-0.32411	0.000188007	0.517748	1.4125e-10	-0.0825928	0.394876	0.0141516	0.848784	0.586124	2.95966e-15
EF0859	-0.180144	0.163049	-1.67727	3.70733e-86	-0.281319	0.0243284	-1.82414	2.12735e-81	-1.26455	3.52751e-38
EF0860	0.183355	0.00757343	-0.218179	0.0117662	-0.0015483	0.987652	-0.0347185	0.645488	-0.0806151	0.259999
EF0860	0.183355	0.00757343	-0.218179	0.0117662	-0.0015483	0.987652	-0.0347185	0.645488	-0.0806151	0.259999
EF0861	0.172908	0.400577	-0.366175	0.0222379	-0.307402	0.0736897	-0.266836	0.116574	-0.0501587	0.743283
EF0861	0.172908	0.400577	-0.366175	0.0222379	-0.307402	0.0736897	-0.266836	0.116574	-0.0501587	0.743283
EF0861	0.172908	0.400577	-0.366175	0.0222379	-0.307402	0.0736897	-0.266836	0.116574	-0.0501587	0.743283
EF0861	0.172908	0.400577	-0.366175	0.0222379	-0.307402	0.0736897	-0.266836	0.116574	-0.0501587	0.743283
EF0861	0.172908	0.400577	-0.366175	0.0222379	-0.307402	0.0736897	-0.266836	0.116574	-0.0501587	0.743283
EF0861	0.172908	0.400577	-0.366175	0.0222379	-0.307402	0.0736897	-0.266836	0.116574	-0.0501587	0.743283
EF0861	0.172908	0.400577	-0.366175	0.0222379	-0.307402	0.0736897	-0.266836	0.116574	-0.0501587	0.743283
EF0861	0.172908	0.400577	-0.366175	0.0222379	-0.307402	0.0736897	-0.266836	0.116574	-0.0501587	0.743283
EF0861	0.172908	0.400577	-0.366175	0.0222379	-0.307402	0.0736897	-0.266836	0.116574	-0.0501587	0.743283
EF0861	0.172908	0.400577	-0.366175	0.0222379	-0.307402	0.0736897	-0.266836	0.116574	-0.0501587	0.743283
EF0861	0.172908	0.400577	-0.366175	0.0222379	-0.307402	0.0736897	-0.266836	0.116574	-0.0501587	0.743283
EF0861	0.172908	0.400577	-0.366175	0.0222379	-0.307402	0.0736897	-0.266836	0.116574	-0.0501587	0.743283
EF0861	0.172908	0.400577	-0.366175	0.0222379	-0.307402	0.0736897	-0.266836	0.116574	-0.0501587	0.743283
EF0861	0.172908	0.400577	-0.366175	0.0222379	-0.307402	0.0736897	-0.266836	0.116574	-0.0501587	0.743283
EF0861	0.172908	0.400577	-0.366175	0.0222379	-0.307402	0.0736897	-0.266836	0.116574	-0.0501587	0.743283
EF0861	0.172908	0.400577	-0.366175	0.0222379	-0.307402	0.0736897	-0.266836	0.116574	-0.0501587	0.743283
EF0862	-0.183881	0.282205	-0.347144	0.0391177	0.0811634	0.640981	-0.62396	2.16369e-09	-0.481317	1.08317e-07
EF0863	-0.0986932	0.544761	-0.297717	0.0675993	0.00432148	0.980093	-0.0560795	0.564018	-0.348822	1.75631e-05
EF0864	0.0210748	0.813386	-0.0910764	0.258546	0.0390701	0.699242	0.0859231	0.279648	-0.188826	0.0161297
EF0865	0.498501	0.0024221	-0.18712	0.26891	-0.00610223	0.972078	0.543318	6.44014e-09	-0.205431	0.00716579
EF0867	-0.26345	0.0358919	-0.187757	0.139801	-0.211031	0.0896641	0.305982	0.0196587	0.0489083	0.688661
EF0868	-0.26085	0.00317566	0.374072	5.05768e-06	0.11151	0.259046	-0.150262	0.0439842	0.217339	0.00226762
EF0869	0.0771978	0.601368	0.582777	2.008e-06	-0.303445	0.0121083	-1.62165	3.10931e-31	0.984149	4.17029e-17
EF0872	-0.0292269	0.75029	-0.964279	5.5952e-31	-0.132852	0.208361	-0.377315	2.37455e-06	-0.710873	2.27325e-19
EF0872	-0.0292269	0.75029	-0.964279	5.5952e-31	-0.132852	0.208361	-0.377315	2.37455e-06	-0.710873	2.27325e-19
EF0875	0.0978246	0.503806	-0.207848	0.198996	0.263016	0.111579	0.217102	0.00223349	-0.476587	9.25208e-11
EF0876	-0.289145	0.466178	-0.701056	0.00376009	-0.0897948	0.765374	-0.355512	0.299057	-0.464898	0.059123
EF0877	-0.531331	2.51805e-08	0.57962	6.0233e-11	0.155567	0.144319	-0.335533	4.91376e-05	0.407151	1.83543e-05
EF0878	0.0358538	0.833401	0.325432	0.0513297	-0.153448	0.385454	0.347838	0.000355645	0.473817	5.11351e-09
EF0879	0.11705	0.0745328	0.11542	0.0292238	-0.132467	0.247982	-0.00850046	0.934274	0.0817338	0.39054
EF0880	0.0135171	0.869815	0.107399	0.086916	-0.0794639	0.376736	0.165371	0.0704065	0.0546254	0.558081
EF0881	-0.0406213	0.676575	-0.0116959	0.892474	0.040073	0.700626	0.266995	0.00247562	-0.183402	0.00988546
EF0882	-0.234432	0.164056	-0.254655	0.129421	-0.0234358	0.892107	-0.0181839	0.854667	-0.412987	1.19979e-06
EF0883	-0.438454	1.23197e-06	-0.342205	4.16874e-05	-0.0976605	0.326855	-0.703962	1.1757e-15	-0.333186	9.82105e-06
EF0884	0.116819	0.149843	0.43423	2.45694e-10	0.105937	0.197487	0.16067	0.0661853	0.387615	3.76111e-05
EF0885	-0.236105	0.0337873	0.0250723	0.791466	-0.0945912	0.419063	-0.458165	1.81287e-06	0.120215	0.238539
EF0886	-0.041427	0.642054	0.358097	1.14499e-05	0.0829931	0.493612	-0.644005	3.67006e-08	0.297693	0.00837206
EF0887	-0.0458626	0.737947	0.349371	0.00309019	0.037827	0.753272	-0.497486	8.43017e-06	0.359313	0.000424172
EF0888	0.251945	0.0037397	0.0767956	0.181748	-0.0566336	0.450942	0.13233	0.0858802	0.220567	0.0066235
EF0889	0.00415725	0.966145	-0.069176	0.325464	0.0192675	0.814324	-0.129614	0.233176	-0.0214114	0.783471
EF0890	-0.31013	0.0191919	-0.495889	6.66098e-06	-0.0525155	0.70854	-0.407822	0.00115289	-0.268845	0.0453142
EF0891	0.190337	0.0269668	-0.842319	8.90829e-34	-0.47579	1.87501e-07	0.146325	0.14887	-0.600914	2.83412e-12
EF0891	0.190337	0.0269668	-0.842319	8.90829e-34	-0.47579	1.87501e-07	0.146325	0.14887	-0.600914	2.83412e-12
EF0891	0.190337	0.0269668	-0.842319	8.90829e-34	-0.47579	1.87501e-07	0.146325	0.14887	-0.600914	2.83412e-12
EF0891	0.190337	0.0269668	-0.842319	8.90829e-34	-0.47579	1.87501e-07	0.146325	0.14887	-0.600914	2.83412e-12
EF0892	0.242041	0.0282413	-0.742166	1.43376e-18	-0.57577	1.88104e-09	0.668469	1.45117e-10	-0.366939	8.09655e-05
EF0892	0.242041	0.0282413	-0.742166	1.43376e-18	-0.57577	1.88104e-09	0.668469	1.45117e-10	-0.366939	8.09655e-05
EF0892	0.242041	0.0282413	-0.742166	1.43376e-18	-0.57577	1.88104e-09	0.668469	1.45117e-10	-0.366939	8.09655e-05
EF0892	0.242041	0.0282413	-0.742166	1.43376e-18	-0.57577	1.88104e-09	0.668469	1.45117e-10	-0.366939	8.09655e-05
EF0892	0.242041	0.0282413	-0.742166	1.43376e-18	-0.57577	1.88104e-09	0.668469	1.45117e-10	-0.366939	8.09655e-05
EF0892	0.242041	0.0282413	-0.742166	1.43376e-18	-0.57577	1.88104e-09	0.668469	1.45117e-10	-0.366939	8.09655e-05
EF0892	0.242041	0.0282413	-0.742166	1.43376e-18	-0.57577	1.88104e-09	0.668469	1.45117e-10	-0.366939	8.09655e-05
EF0892	0.242041	0.0282413	-0.742166	1.43376e-18	-0.57577	1.88104e-09	0.668469	1.45117e-10	-0.366939	8.09655e-05
EF0893	0.700426	3.0975e-07	-0.537536	5.43883e-08	-0.441827	9.85641e-05	1.06786	9.4879e-23	-0.0571105	0.615875
EF0893	0.700426	3.0975e-07	-0.537536	5.43883e-08	-0.441827	9.85641e-05	1.06786	9.4879e-23	-0.0571105	0.615875
EF0893	0.700426	3.0975e-07	-0.537536	5.43883e-08	-0.441827	9.85641e-05	1.06786	9.4879e-23	-0.0571105	0.615875
EF0893	0.700426	3.0975e-07	-0.537536	5.43883e-08	-0.441827	9.85641e-05	1.06786	9.4879e-23	-0.0571105	0.615875
EF0895	-0.0636114	0.558217	0.234418	0.00865067	-0.0380482	0.721544	0.246422	0.0316826	0.162725	0.1813
EF0895	-0.0636114	0.558217	0.234418	0.00865067	-0.0380482	0.721544	0.246422	0.0316826	0.162725	0.1813
EF0895	-0.0636114	0.558217	0.234418	0.00865067	-0.0380482	0.721544	0.246422	0.0316826	0.162725	0.1813
EF0895	-0.0636114	0.558217	0.234418	0.00865067	-0.0380482	0.721544	0.246422	0.0316826	0.162725	0.1813
EF0896	0.133109	0.0591666	-0.542929	2.47483e-09	0.310217	0.00181882	-0.17821	0.0626987	-0.549763	1.05292e-08
EF0897	-0.196688	0.251682	0.47315	8.62762e-05	0.451331	0.00304168	-0.48492	1.5504e-06	0.0763244	0.501022
EF0899	0.0330915	0.74683	-0.286158	0.0063485	0.202319	0.083533	-0.35276	0.000977039	-0.370914	0.000166395
EF0900	-0.042893	0.825009	0.485147	0.0108801	-0.255933	0.190655	0.288661	0.00900744	0.260248	0.00160664
EF0900	-0.042893	0.825009	0.485147	0.0108801	-0.255933	0.190655	0.288661	0.00900744	0.260248	0.00160664
EF0900	-0.042893	0.825009	0.485147	0.0108801	-0.255933	0.190655	0.288661	0.00900744	0.260248	0.00160664
EF0900	-0.042893	0.825009	0.485147	0.0108801	-0.255933	0.190655	0.288661	0.00900744	0.260248	0.00160664
EF0900	-0.042893	0.825009	0.485147	0.0108801	-0.255933	0.190655	0.288661	0.00900744	0.260248	0.00160664
EF0900	-0.042893	0.825009	0.485147	0.0108801	-0.255933	0.190655	0.288661	0.00900744	0.260248	0.00160664
EF0900	-0.042893	0.825009	0.485147	0.0108801	-0.255933	0.190655	0.288661	0.00900744	0.260248	0.00160664
EF0900	-0.042893	0.825009	0.485147	0.0108801	-0.255933	0.190655	0.288661	0.00900744	0.260248	0.00160664
EF0900	-0.042893	0.825009	0.485147	0.0108801	-0.255933	0.190655	0.288661	0.00900744	0.260248	0.00160664
EF0900	-0.042893	0.825009	0.485147	0.0108801	-0.255933	0.190655	0.288661	0.00900744	0.260248	0.00160664
EF0900	-0.042893	0.825009	0.485147	0.0108801	-0.255933	0.190655	0.288661	0.00900744	0.260248	0.00160664
EF0900	-0.042893	0.825009	0.485147	0.0108801	-0.255933	0.190655	0.288661	0.00900744	0.260248	0.00160664
EF0900	-0.042893	0.825009	0.485147	0.0108801	-0.255933	0.190655	0.288661	0.00900744	0.260248	0.00160664
EF0900	-0.042893	0.825009	0.485147	0.0108801	-0.255933	0.190655	0.288661	0.00900744	0.260248	0.00160664
EF0900	-0.042893	0.825009	0.485147	0.0108801	-0.255933	0.190655	0.288661	0.00900744	0.260248	0.00160664
EF0900	-0.042893	0.825009	0.485147	0.0108801	-0.255933	0.190655	0.288661	0.00900744	0.260248	0.00160664
EF0900	-0.042893	0.825009	0.485147	0.0108801	-0.255933	0.190655	0.288661	0.00900744	0.260248	0.00160664
EF0900	-0.042893	0.825009	0.485147	0.0108801	-0.255933	0.190655	0.288661	0.00900744	0.260248	0.00160664
EF0900	-0.042893	0.825009	0.485147	0.0108801	-0.255933	0.190655	0.288661	0.00900744	0.260248	0.00160664
EF0900	-0.042893	0.825009	0.485147	0.0108801	-0.255933	0.190655	0.288661	0.00900744	0.260248	0.00160664
EF0900	-0.042893	0.825009	0.485147	0.0108801	-0.255933	0.190655	0.288661	0.00900744	0.260248	0.00160664
EF0900	-0.042893	0.825009	0.485147	0.0108801	-0.255933	0.190655	0.288661	0.00900744	0.260248	0.00160664
EF0900	-0.042893	0.825009	0.485147	0.0108801	-0.255933	0.190655	0.288661	0.00900744	0.260248	0.00160664
EF0900	-0.042893	0.825009	0.485147	0.0108801	-0.255933	0.190655	0.288661	0.00900744	0.260248	0.00160664
EF0900	-0.042893	0.825009	0.485147	0.0108801	-0.255933	0.190655	0.288661	0.00900744	0.260248	0.00160664
EF0900	-0.042893	0.825009	0.485147	0.0108801	-0.255933	0.190655	0.288661	0.00900744	0.260248	0.00160664
EF0900	-0.042893	0.825009	0.485147	0.0108801	-0.255933	0.190655	0.288661	0.00900744	0.260248	0.00160664
EF0900	-0.042893	0.825009	0.485147	0.0108801	-0.255933	0.190655	0.288661	0.00900744	0.260248	0.00160664
EF0900	-0.042893	0.825009	0.485147	0.0108801	-0.255933	0.190655	0.288661	0.00900744	0.260248	0.00160664
EF0900	-0.042893	0.825009	0.485147	0.0108801	-0.255933	0.190655	0.288661	0.00900744	0.260248	0.00160664
EF0900	-0.042893	0.825009	0.485147	0.0108801	-0.255933	0.190655	0.288661	0.00900744	0.260248	0.00160664
EF0900	-0.042893	0.825009	0.485147	0.0108801	-0.255933	0.190655	0.288661	0.00900744	0.260248	0.00160664
EF0901	-0.0867058	0.215008	0.122072	0.0548019	0.0974941	0.287336	-0.411117	3.78968e-06	0.221574	0.00891859
EF0902	0.0359126	0.656858	0.288295	2.49906e-05	0.130214	0.13597	-0.204901	0.0104114	0.380985	9.81175e-08
EF0903	0.265391	0.0019818	0.314151	3.87539e-06	0.0696101	0.403473	0.218872	0.0139467	0.510868	1.19109e-10
EF0904	0.781028	5.92917e-07	-0.0122586	0.957526	-0.37673	0.0034137	1.10204	2.17891e-13	0.756593	7.92117e-08
EF0905	0.187719	0.111337	-0.645227	4.08582e-11	0.0377957	0.763636	0.0428784	0.740575	-0.137933	0.271196
EF0905	0.187719	0.111337	-0.645227	4.08582e-11	0.0377957	0.763636	0.0428784	0.740575	-0.137933	0.271196
EF0905	0.187719	0.111337	-0.645227	4.08582e-11	0.0377957	0.763636	0.0428784	0.740575	-0.137933	0.271196
EF0905	0.187719	0.111337	-0.645227	4.08582e-11	0.0377957	0.763636	0.0428784	0.740575	-0.137933	0.271196
EF0905	0.187719	0.111337	-0.645227	4.08582e-11	0.0377957	0.763636	0.0428784	0.740575	-0.137933	0.271196
EF0905	0.187719	0.111337	-0.645227	4.08582e-11	0.0377957	0.763636	0.0428784	0.740575	-0.137933	0.271196
EF0905	0.187719	0.111337	-0.645227	4.08582e-11	0.0377957	0.763636	0.0428784	0.740575	-0.137933	0.271196
EF0905	0.187719	0.111337	-0.645227	4.08582e-11	0.0377957	0.763636	0.0428784	0.740575	-0.137933	0.271196
EF0906	0.839505	1.82443e-09	-0.872493	3.26497e-23	-0.0936407	0.42283	0.721407	3.58786e-08	-0.344298	0.00116573
EF0906	0.839505	1.82443e-09	-0.872493	3.26497e-23	-0.0936407	0.42283	0.721407	3.58786e-08	-0.344298	0.00116573
EF0906	0.839505	1.82443e-09	-0.872493	3.26497e-23	-0.0936407	0.42283	0.721407	3.58786e-08	-0.344298	0.00116573
EF0906	0.839505	1.82443e-09	-0.872493	3.26497e-23	-0.0936407	0.42283	0.721407	3.58786e-08	-0.344298	0.00116573
EF0906	0.839505	1.82443e-09	-0.872493	3.26497e-23	-0.0936407	0.42283	0.721407	3.58786e-08	-0.344298	0.00116573
EF0906	0.839505	1.82443e-09	-0.872493	3.26497e-23	-0.0936407	0.42283	0.721407	3.58786e-08	-0.344298	0.00116573
EF0906	0.839505	1.82443e-09	-0.872493	3.26497e-23	-0.0936407	0.42283	0.721407	3.58786e-08	-0.344298	0.00116573
EF0906	0.839505	1.82443e-09	-0.872493	3.26497e-23	-0.0936407	0.42283	0.721407	3.58786e-08	-0.344298	0.00116573
EF0906	0.839505	1.82443e-09	-0.872493	3.26497e-23	-0.0936407	0.42283	0.721407	3.58786e-08	-0.344298	0.00116573
EF0906	0.839505	1.82443e-09	-0.872493	3.26497e-23	-0.0936407	0.42283	0.721407	3.58786e-08	-0.344298	0.00116573
EF0906	0.839505	1.82443e-09	-0.872493	3.26497e-23	-0.0936407	0.42283	0.721407	3.58786e-08	-0.344298	0.00116573
EF0906	0.839505	1.82443e-09	-0.872493	3.26497e-23	-0.0936407	0.42283	0.721407	3.58786e-08	-0.344298	0.00116573
EF0906	0.839505	1.82443e-09	-0.872493	3.26497e-23	-0.0936407	0.42283	0.721407	3.58786e-08	-0.344298	0.00116573
EF0906	0.839505	1.82443e-09	-0.872493	3.26497e-23	-0.0936407	0.42283	0.721407	3.58786e-08	-0.344298	0.00116573
EF0906	0.839505	1.82443e-09	-0.872493	3.26497e-23	-0.0936407	0.42283	0.721407	3.58786e-08	-0.344298	0.00116573
EF0906	0.839505	1.82443e-09	-0.872493	3.26497e-23	-0.0936407	0.42283	0.721407	3.58786e-08	-0.344298	0.00116573
EF0908	0.388414	0.000116849	-0.52454	1.35134e-08	0.00189803	0.978629	0.526546	4.70716e-11	-0.418478	9.55634e-09
EF0909	0.549211	3.63464e-09	-0.510255	1.79331e-09	0.0177877	0.858557	0.458612	9.37616e-11	-0.337092	4.70685e-06
EF0910	0.275383	0.120769	-0.188048	0.296056	0.0166062	0.927708	0.313015	0.00138566	-0.250857	0.00102762
EF0911	-0.040607	0.831453	-0.0893061	0.61497	0.0318192	0.858593	0.0495347	0.626943	-0.255492	0.00107499
EF0912	-0.22758	0.235385	-0.0945192	0.591761	0.161906	0.399097	-0.34615	0.00097937	-0.337185	4.7838e-05
EF0913	0.022587	0.817736	0.368966	1.70478e-05	-0.0927878	0.411132	-0.0420086	0.650039	0.426845	3.93286e-06
EF0914	-0.15424	0.350257	-0.131796	0.426714	-0.148499	0.384926	-0.457127	5.09984e-06	0.0862651	0.291632
EF0915	0.0382985	0.815815	0.626527	9.0585e-05	-0.175137	0.304452	0.000385046	0.997243	0.793664	1.25197e-26
EF0916	-0.00718282	0.968733	0.874804	4.06399e-07	-0.122663	0.501264	-0.178775	0.0876507	1.03408	6.68843e-33
EF0917	-0.146411	0.519157	-0.904055	1.47542e-09	-0.320581	0.0784773	0.713755	0.000265574	-0.524996	0.000243636
EF0918	-0.150547	0.45084	1.10938	1.60916e-07	0.00344792	0.986372	-0.094618	0.712767	1.01671	9.48216e-07
EF0919	0.197576	0.0863066	0.570805	9.58593e-19	0.286529	0.00263602	0.672569	5.11127e-07	0.223365	0.0188846
EF0920	-0.272985	9.43604e-05	0.167714	0.00484548	-0.0193215	0.793025	0.0905402	0.281366	0.0939414	0.229551
EF0920	-0.272985	9.43604e-05	0.167714	0.00484548	-0.0193215	0.793025	0.0905402	0.281366	0.0939414	0.229551
EF0920	-0.272985	9.43604e-05	0.167714	0.00484548	-0.0193215	0.793025	0.0905402	0.281366	0.0939414	0.229551
EF0921	0.272975	0.0917269	-0.585011	3.73542e-07	-0.132142	0.292928	0.188953	0.155008	-0.087663	0.415932
EF0921	0.272975	0.0917269	-0.585011	3.73542e-07	-0.132142	0.292928	0.188953	0.155008	-0.087663	0.415932
EF0922	0.280369	0.00364781	-0.696971	7.29735e-22	0.141693	0.123313	-0.0444572	0.623924	-0.702232	2.24749e-19
EF0922	0.280369	0.00364781	-0.696971	7.29735e-22	0.141693	0.123313	-0.0444572	0.623924	-0.702232	2.24749e-19
EF0922	0.280369	0.00364781	-0.696971	7.29735e-22	0.141693	0.123313	-0.0444572	0.623924	-0.702232	2.24749e-19
EF0922	0.280369	0.00364781	-0.696971	7.29735e-22	0.141693	0.123313	-0.0444572	0.623924	-0.702232	2.24749e-19
EF0922	0.280369	0.00364781	-0.696971	7.29735e-22	0.141693	0.123313	-0.0444572	0.623924	-0.702232	2.24749e-19
EF0922	0.280369	0.00364781	-0.696971	7.29735e-22	0.141693	0.123313	-0.0444572	0.623924	-0.702232	2.24749e-19
EF0922	0.280369	0.00364781	-0.696971	7.29735e-22	0.141693	0.123313	-0.0444572	0.623924	-0.702232	2.24749e-19
EF0922	0.280369	0.00364781	-0.696971	7.29735e-22	0.141693	0.123313	-0.0444572	0.623924	-0.702232	2.24749e-19
EF0923	0.574652	6.62517e-05	-0.337605	0.00060556	-0.0106858	0.929844	0.641833	1.86403e-05	-0.181401	0.150937
EF0923	0.574652	6.62517e-05	-0.337605	0.00060556	-0.0106858	0.929844	0.641833	1.86403e-05	-0.181401	0.150937
EF0923	0.574652	6.62517e-05	-0.337605	0.00060556	-0.0106858	0.929844	0.641833	1.86403e-05	-0.181401	0.150937
EF0923	0.574652	6.62517e-05	-0.337605	0.00060556	-0.0106858	0.929844	0.641833	1.86403e-05	-0.181401	0.150937
EF0924	-0.312389	0.000193988	-0.311885	3.33311e-06	-0.0287089	0.745996	0.074873	0.390927	-0.334888	2.5599e-05
EF0924	-0.312389	0.000193988	-0.311885	3.33311e-06	-0.0287089	0.745996	0.074873	0.390927	-0.334888	2.5599e-05
EF0925	-0.0706936	0.809943	-0.0323169	0.793801	0.509213	0.0179327	-0.0728546	0.838167	0.116743	0.609975
EF0926	-0.538269	7.20941e-13	0.284203	2.62469e-06	-0.0260356	0.733202	-0.310477	7.61132e-05	0.240156	0.000933999
EF0927	-0.688304	6.48317e-23	-0.364489	5.27913e-10	-0.185876	0.0157067	-0.781457	1.15817e-25	-0.0386256	0.60069
EF0928	0.724642	2.29697e-12	-0.125014	0.10661	-0.0169245	0.847015	-0.0182616	0.852001	0.152773	0.0917835
EF0928	0.724642	2.29697e-12	-0.125014	0.10661	-0.0169245	0.847015	-0.0182616	0.852001	0.152773	0.0917835
EF0929	0.691324	3.42532e-14	0.0578909	0.359783	-0.173405	0.0319143	0.332457	9.20665e-05	0.391527	4.18577e-06
EF0929	0.691324	3.42532e-14	0.0578909	0.359783	-0.173405	0.0319143	0.332457	9.20665e-05	0.391527	4.18577e-06
EF0929	0.691324	3.42532e-14	0.0578909	0.359783	-0.173405	0.0319143	0.332457	9.20665e-05	0.391527	4.18577e-06
EF0930	0.344563	0.0404042	0.825164	3.7397e-07	0.180031	0.300976	0.301845	0.00112944	0.654257	4.74221e-18
EF0932	-0.0437868	0.79061	-1.76688	1.22494e-48	-0.827527	4.65158e-08	0.214277	0.0860459	-0.722815	3.44343e-12
EF0933	0.501122	1.4062e-07	-1.97826	1.12813e-75	-0.182787	0.0570885	0.508243	5.38622e-09	-1.51494	2.41149e-75
EF0933	0.501122	1.4062e-07	-1.97826	1.12813e-75	-0.182787	0.0570885	0.508243	5.38622e-09	-1.51494	2.41149e-75
EF0933	0.501122	1.4062e-07	-1.97826	1.12813e-75	-0.182787	0.0570885	0.508243	5.38622e-09	-1.51494	2.41149e-75
EF0933	0.501122	1.4062e-07	-1.97826	1.12813e-75	-0.182787	0.0570885	0.508243	5.38622e-09	-1.51494	2.41149e-75
EF0933	0.501122	1.4062e-07	-1.97826	1.12813e-75	-0.182787	0.0570885	0.508243	5.38622e-09	-1.51494	2.41149e-75
EF0933	0.501122	1.4062e-07	-1.97826	1.12813e-75	-0.182787	0.0570885	0.508243	5.38622e-09	-1.51494	2.41149e-75
EF0933	0.501122	1.4062e-07	-1.97826	1.12813e-75	-0.182787	0.0570885	0.508243	5.38622e-09	-1.51494	2.41149e-75
EF0933	0.501122	1.4062e-07	-1.97826	1.12813e-75	-0.182787	0.0570885	0.508243	5.38622e-09	-1.51494	2.41149e-75
EF0933	0.501122	1.4062e-07	-1.97826	1.12813e-75	-0.182787	0.0570885	0.508243	5.38622e-09	-1.51494	2.41149e-75
EF0933	0.501122	1.4062e-07	-1.97826	1.12813e-75	-0.182787	0.0570885	0.508243	5.38622e-09	-1.51494	2.41149e-75
EF0934	0.109139	0.146123	0.331438	9.5669e-09	-0.00151491	0.992311	0.495204	3.67049e-09	0.344948	7.1879e-06
EF0934	0.109139	0.146123	0.331438	9.5669e-09	-0.00151491	0.992311	0.495204	3.67049e-09	0.344948	7.1879e-06
EF0934	0.109139	0.146123	0.331438	9.5669e-09	-0.00151491	0.992311	0.495204	3.67049e-09	0.344948	7.1879e-06
EF0935	-0.11575	0.0893934	0.157167	0.0126148	-0.0589519	0.487002	0.260587	0.0034125	0.185495	0.0290118
EF0935	-0.11575	0.0893934	0.157167	0.0126148	-0.0589519	0.487002	0.260587	0.0034125	0.185495	0.0290118
EF0935	-0.11575	0.0893934	0.157167	0.0126148	-0.0589519	0.487002	0.260587	0.0034125	0.185495	0.0290118
EF0936	-0.254626	0.00673359	0.00128148	0.991679	-0.0965153	0.339328	-0.0324595	0.667853	0.136226	0.058511
EF0936	-0.254626	0.00673359	0.00128148	0.991679	-0.0965153	0.339328	-0.0324595	0.667853	0.136226	0.058511
EF0936	-0.254626	0.00673359	0.00128148	0.991679	-0.0965153	0.339328	-0.0324595	0.667853	0.136226	0.058511
EF0937	0.202952	0.310434	0.208755	0.126982	0.00451954	1	0.145404	0.291853	0.0706205	0.578909
EF0937	0.202952	0.310434	0.208755	0.126982	0.00451954	1	0.145404	0.291853	0.0706205	0.578909
EF0938	-0.965137	7.78097e-28	-0.457504	1.49916e-08	-0.181069	0.0620536	-0.970897	1.37215e-38	-0.713367	6.77064e-22
EF0939	-0.337593	1.3739e-05	0.0142561	0.829076	0.195708	0.0384501	-0.120058	0.218709	-0.167784	0.0678014
EF0940	-0.872673	5.2009e-18	0.751215	1.74215e-13	-0.119186	0.35733	-0.982389	2.96074e-19	0.778027	2.7863e-10
EF0941	-0.328824	0.000919004	-0.458111	3.03438e-07	-0.0994263	0.400097	-0.0569362	0.550285	-0.467749	5.92151e-07
EF0942	-0.372524	7.11741e-08	-0.469479	2.57405e-17	-0.155275	0.0426406	0.5752	3.27147e-11	-0.295286	0.000187664
EF0943	0.311844	0.000565248	0.202776	0.0059384	0.18941	0.0318645	0.848566	1.42558e-13	0.105698	0.269595
EF0944	0.283038	0.00694648	0.824896	3.46711e-42	-0.210809	0.0355941	0.280144	0.0004261	1.04096	1.27372e-46
EF0945	0.446217	1.95623e-05	0.138797	0.0921476	-0.464626	7.34232e-07	0.183062	0.0416091	0.747326	1.6863e-17
EF0946	-0.634569	2.34745e-19	-0.0272434	0.662792	-0.0103922	0.916315	-0.552289	4.87594e-09	-0.0826239	0.386828
EF0947	-0.300319	0.00118103	0.240717	2.49694e-05	0.108297	0.303674	-0.143233	0.0670872	0.0207873	0.786363
EF0948	-0.111713	0.1761	0.544743	7.9322e-13	0.0960725	0.273623	0.0682033	0.472849	0.570618	1.32873e-11
EF0949	0.0946992	0.323508	0.83628	3.1951e-22	0.0191778	0.850475	0.111135	0.211894	0.958569	6.54402e-40
EF0950	0.643294	9.55029e-06	0.108859	0.316734	0.0367916	0.818189	-0.161883	0.251229	0.23509	0.10337
EF0951	0.424166	0.000982207	0.18666	0.0508286	-0.0225058	0.871383	-0.438613	0.000776472	0.398634	0.00115699
EF0953			0.905171	0.0111231	0.237312	0.516949			0.390053	0.338687
EF0954	0.286822	0.000295986	-1.10689	3.25597e-67	0.0319795	0.720737	0.133957	0.157877	-1.05436	2.12094e-33
EF0955	0.870631	9.88969e-06	-1.62892	6.88135e-52	-0.275344	0.063931	0.696955	5.55939e-06	-1.18731	2.11619e-29
EF0955	0.870631	9.88969e-06	-1.62892	6.88135e-52	-0.275344	0.063931	0.696955	5.55939e-06	-1.18731	2.11619e-29
EF0955	0.870631	9.88969e-06	-1.62892	6.88135e-52	-0.275344	0.063931	0.696955	5.55939e-06	-1.18731	2.11619e-29
EF0955	0.870631	9.88969e-06	-1.62892	6.88135e-52	-0.275344	0.063931	0.696955	5.55939e-06	-1.18731	2.11619e-29
EF0955	0.870631	9.88969e-06	-1.62892	6.88135e-52	-0.275344	0.063931	0.696955	5.55939e-06	-1.18731	2.11619e-29
EF0955	0.870631	9.88969e-06	-1.62892	6.88135e-52	-0.275344	0.063931	0.696955	5.55939e-06	-1.18731	2.11619e-29
EF0955	0.870631	9.88969e-06	-1.62892	6.88135e-52	-0.275344	0.063931	0.696955	5.55939e-06	-1.18731	2.11619e-29
EF0955	0.870631	9.88969e-06	-1.62892	6.88135e-52	-0.275344	0.063931	0.696955	5.55939e-06	-1.18731	2.11619e-29
EF0955	0.870631	9.88969e-06	-1.62892	6.88135e-52	-0.275344	0.063931	0.696955	5.55939e-06	-1.18731	2.11619e-29
EF0956	-0.0976358	0.714336	-0.618207	0.00278658	-0.103969	0.69999	-0.551845	0.0284536	-0.237394	0.211565
EF0956	-0.0976358	0.714336	-0.618207	0.00278658	-0.103969	0.69999	-0.551845	0.0284536	-0.237394	0.211565
EF0956	-0.0976358	0.714336	-0.618207	0.00278658	-0.103969	0.69999	-0.551845	0.0284536	-0.237394	0.211565
EF0956	-0.0976358	0.714336	-0.618207	0.00278658	-0.103969	0.69999	-0.551845	0.0284536	-0.237394	0.211565
EF0956	-0.0976358	0.714336	-0.618207	0.00278658	-0.103969	0.69999	-0.551845	0.0284536	-0.237394	0.211565
EF0956	-0.0976358	0.714336	-0.618207	0.00278658	-0.103969	0.69999	-0.551845	0.0284536	-0.237394	0.211565
EF0956	-0.0976358	0.714336	-0.618207	0.00278658	-0.103969	0.69999	-0.551845	0.0284536	-0.237394	0.211565
EF0956	-0.0976358	0.714336	-0.618207	0.00278658	-0.103969	0.69999	-0.551845	0.0284536	-0.237394	0.211565
EF0956	-0.0976358	0.714336	-0.618207	0.00278658	-0.103969	0.69999	-0.551845	0.0284536	-0.237394	0.211565
EF0957	-0.0697154	0.684252	-0.479074	0.000248302	-0.255183	0.0693654	-0.550112	6.88602e-05	-0.398682	0.000724056
EF0957	-0.0697154	0.684252	-0.479074	0.000248302	-0.255183	0.0693654	-0.550112	6.88602e-05	-0.398682	0.000724056
EF0957	-0.0697154	0.684252	-0.479074	0.000248302	-0.255183	0.0693654	-0.550112	6.88602e-05	-0.398682	0.000724056
EF0957	-0.0697154	0.684252	-0.479074	0.000248302	-0.255183	0.0693654	-0.550112	6.88602e-05	-0.398682	0.000724056
EF0957	-0.0697154	0.684252	-0.479074	0.000248302	-0.255183	0.0693654	-0.550112	6.88602e-05	-0.398682	0.000724056
EF0957	-0.0697154	0.684252	-0.479074	0.000248302	-0.255183	0.0693654	-0.550112	6.88602e-05	-0.398682	0.000724056
EF0957	-0.0697154	0.684252	-0.479074	0.000248302	-0.255183	0.0693654	-0.550112	6.88602e-05	-0.398682	0.000724056
EF0957	-0.0697154	0.684252	-0.479074	0.000248302	-0.255183	0.0693654	-0.550112	6.88602e-05	-0.398682	0.000724056
EF0957	-0.0697154	0.684252	-0.479074	0.000248302	-0.255183	0.0693654	-0.550112	6.88602e-05	-0.398682	0.000724056
EF0958	-0.176665	0.370554	-0.441858	0.00046045	0.345843	0.0249497	-0.955998	4.0915e-08	-0.724563	1.29146e-08
EF0958	-0.176665	0.370554	-0.441858	0.00046045	0.345843	0.0249497	-0.955998	4.0915e-08	-0.724563	1.29146e-08
EF0958	-0.176665	0.370554	-0.441858	0.00046045	0.345843	0.0249497	-0.955998	4.0915e-08	-0.724563	1.29146e-08
EF0958	-0.176665	0.370554	-0.441858	0.00046045	0.345843	0.0249497	-0.955998	4.0915e-08	-0.724563	1.29146e-08
EF0958	-0.176665	0.370554	-0.441858	0.00046045	0.345843	0.0249497	-0.955998	4.0915e-08	-0.724563	1.29146e-08
EF0958	-0.176665	0.370554	-0.441858	0.00046045	0.345843	0.0249497	-0.955998	4.0915e-08	-0.724563	1.29146e-08
EF0958	-0.176665	0.370554	-0.441858	0.00046045	0.345843	0.0249497	-0.955998	4.0915e-08	-0.724563	1.29146e-08
EF0958	-0.176665	0.370554	-0.441858	0.00046045	0.345843	0.0249497	-0.955998	4.0915e-08	-0.724563	1.29146e-08
EF0958	-0.176665	0.370554	-0.441858	0.00046045	0.345843	0.0249497	-0.955998	4.0915e-08	-0.724563	1.29146e-08
EF0958	-0.176665	0.370554	-0.441858	0.00046045	0.345843	0.0249497	-0.955998	4.0915e-08	-0.724563	1.29146e-08
EF0958	-0.176665	0.370554	-0.441858	0.00046045	0.345843	0.0249497	-0.955998	4.0915e-08	-0.724563	1.29146e-08
EF0958	-0.176665	0.370554	-0.441858	0.00046045	0.345843	0.0249497	-0.955998	4.0915e-08	-0.724563	1.29146e-08
EF0958	-0.176665	0.370554	-0.441858	0.00046045	0.345843	0.0249497	-0.955998	4.0915e-08	-0.724563	1.29146e-08
EF0958	-0.176665	0.370554	-0.441858	0.00046045	0.345843	0.0249497	-0.955998	4.0915e-08	-0.724563	1.29146e-08
EF0958	-0.176665	0.370554	-0.441858	0.00046045	0.345843	0.0249497	-0.955998	4.0915e-08	-0.724563	1.29146e-08
EF0958	-0.176665	0.370554	-0.441858	0.00046045	0.345843	0.0249497	-0.955998	4.0915e-08	-0.724563	1.29146e-08
EF0958	-0.176665	0.370554	-0.441858	0.00046045	0.345843	0.0249497	-0.955998	4.0915e-08	-0.724563	1.29146e-08
EF0958	-0.176665	0.370554	-0.441858	0.00046045	0.345843	0.0249497	-0.955998	4.0915e-08	-0.724563	1.29146e-08
EF0958	-0.176665	0.370554	-0.441858	0.00046045	0.345843	0.0249497	-0.955998	4.0915e-08	-0.724563	1.29146e-08
EF0958	-0.176665	0.370554	-0.441858	0.00046045	0.345843	0.0249497	-0.955998	4.0915e-08	-0.724563	1.29146e-08
EF0958	-0.176665	0.370554	-0.441858	0.00046045	0.345843	0.0249497	-0.955998	4.0915e-08	-0.724563	1.29146e-08
EF0958	-0.176665	0.370554	-0.441858	0.00046045	0.345843	0.0249497	-0.955998	4.0915e-08	-0.724563	1.29146e-08
EF0958	-0.176665	0.370554	-0.441858	0.00046045	0.345843	0.0249497	-0.955998	4.0915e-08	-0.724563	1.29146e-08
EF0958	-0.176665	0.370554	-0.441858	0.00046045	0.345843	0.0249497	-0.955998	4.0915e-08	-0.724563	1.29146e-08
EF0958	-0.176665	0.370554	-0.441858	0.00046045	0.345843	0.0249497	-0.955998	4.0915e-08	-0.724563	1.29146e-08
EF0958	-0.176665	0.370554	-0.441858	0.00046045	0.345843	0.0249497	-0.955998	4.0915e-08	-0.724563	1.29146e-08
EF0958	-0.176665	0.370554	-0.441858	0.00046045	0.345843	0.0249497	-0.955998	4.0915e-08	-0.724563	1.29146e-08
EF0958	-0.176665	0.370554	-0.441858	0.00046045	0.345843	0.0249497	-0.955998	4.0915e-08	-0.724563	1.29146e-08
EF0958	-0.176665	0.370554	-0.441858	0.00046045	0.345843	0.0249497	-0.955998	4.0915e-08	-0.724563	1.29146e-08
EF0958	-0.176665	0.370554	-0.441858	0.00046045	0.345843	0.0249497	-0.955998	4.0915e-08	-0.724563	1.29146e-08
EF0958	-0.176665	0.370554	-0.441858	0.00046045	0.345843	0.0249497	-0.955998	4.0915e-08	-0.724563	1.29146e-08
EF0958	-0.176665	0.370554	-0.441858	0.00046045	0.345843	0.0249497	-0.955998	4.0915e-08	-0.724563	1.29146e-08
EF0958	-0.176665	0.370554	-0.441858	0.00046045	0.345843	0.0249497	-0.955998	4.0915e-08	-0.724563	1.29146e-08
EF0958	-0.176665	0.370554	-0.441858	0.00046045	0.345843	0.0249497	-0.955998	4.0915e-08	-0.724563	1.29146e-08
EF0958	-0.176665	0.370554	-0.441858	0.00046045	0.345843	0.0249497	-0.955998	4.0915e-08	-0.724563	1.29146e-08
EF0958	-0.176665	0.370554	-0.441858	0.00046045	0.345843	0.0249497	-0.955998	4.0915e-08	-0.724563	1.29146e-08
EF0958	-0.176665	0.370554	-0.441858	0.00046045	0.345843	0.0249497	-0.955998	4.0915e-08	-0.724563	1.29146e-08
EF0958	-0.176665	0.370554	-0.441858	0.00046045	0.345843	0.0249497	-0.955998	4.0915e-08	-0.724563	1.29146e-08
EF0958	-0.176665	0.370554	-0.441858	0.00046045	0.345843	0.0249497	-0.955998	4.0915e-08	-0.724563	1.29146e-08
EF0958	-0.176665	0.370554	-0.441858	0.00046045	0.345843	0.0249497	-0.955998	4.0915e-08	-0.724563	1.29146e-08
EF0958	-0.176665	0.370554	-0.441858	0.00046045	0.345843	0.0249497	-0.955998	4.0915e-08	-0.724563	1.29146e-08
EF0958	-0.176665	0.370554	-0.441858	0.00046045	0.345843	0.0249497	-0.955998	4.0915e-08	-0.724563	1.29146e-08
EF0958	-0.176665	0.370554	-0.441858	0.00046045	0.345843	0.0249497	-0.955998	4.0915e-08	-0.724563	1.29146e-08
EF0958	-0.176665	0.370554	-0.441858	0.00046045	0.345843	0.0249497	-0.955998	4.0915e-08	-0.724563	1.29146e-08
EF0958	-0.176665	0.370554	-0.441858	0.00046045	0.345843	0.0249497	-0.955998	4.0915e-08	-0.724563	1.29146e-08
EF0958	-0.176665	0.370554	-0.441858	0.00046045	0.345843	0.0249497	-0.955998	4.0915e-08	-0.724563	1.29146e-08
EF0958	-0.176665	0.370554	-0.441858	0.00046045	0.345843	0.0249497	-0.955998	4.0915e-08	-0.724563	1.29146e-08
EF0958	-0.176665	0.370554	-0.441858	0.00046045	0.345843	0.0249497	-0.955998	4.0915e-08	-0.724563	1.29146e-08
EF0958	-0.176665	0.370554	-0.441858	0.00046045	0.345843	0.0249497	-0.955998	4.0915e-08	-0.724563	1.29146e-08
EF0958	-0.176665	0.370554	-0.441858	0.00046045	0.345843	0.0249497	-0.955998	4.0915e-08	-0.724563	1.29146e-08
EF0958	-0.176665	0.370554	-0.441858	0.00046045	0.345843	0.0249497	-0.955998	4.0915e-08	-0.724563	1.29146e-08
EF0958	-0.176665	0.370554	-0.441858	0.00046045	0.345843	0.0249497	-0.955998	4.0915e-08	-0.724563	1.29146e-08
EF0958	-0.176665	0.370554	-0.441858	0.00046045	0.345843	0.0249497	-0.955998	4.0915e-08	-0.724563	1.29146e-08
EF0958	-0.176665	0.370554	-0.441858	0.00046045	0.345843	0.0249497	-0.955998	4.0915e-08	-0.724563	1.29146e-08
EF0958	-0.176665	0.370554	-0.441858	0.00046045	0.345843	0.0249497	-0.955998	4.0915e-08	-0.724563	1.29146e-08
EF0958	-0.176665	0.370554	-0.441858	0.00046045	0.345843	0.0249497	-0.955998	4.0915e-08	-0.724563	1.29146e-08
EF0958	-0.176665	0.370554	-0.441858	0.00046045	0.345843	0.0249497	-0.955998	4.0915e-08	-0.724563	1.29146e-08
EF0958	-0.176665	0.370554	-0.441858	0.00046045	0.345843	0.0249497	-0.955998	4.0915e-08	-0.724563	1.29146e-08
EF0958	-0.176665	0.370554	-0.441858	0.00046045	0.345843	0.0249497	-0.955998	4.0915e-08	-0.724563	1.29146e-08
EF0958	-0.176665	0.370554	-0.441858	0.00046045	0.345843	0.0249497	-0.955998	4.0915e-08	-0.724563	1.29146e-08
EF0958	-0.176665	0.370554	-0.441858	0.00046045	0.345843	0.0249497	-0.955998	4.0915e-08	-0.724563	1.29146e-08
EF0958	-0.176665	0.370554	-0.441858	0.00046045	0.345843	0.0249497	-0.955998	4.0915e-08	-0.724563	1.29146e-08
EF0958	-0.176665	0.370554	-0.441858	0.00046045	0.345843	0.0249497	-0.955998	4.0915e-08	-0.724563	1.29146e-08
EF0958	-0.176665	0.370554	-0.441858	0.00046045	0.345843	0.0249497	-0.955998	4.0915e-08	-0.724563	1.29146e-08
EF0958	-0.176665	0.370554	-0.441858	0.00046045	0.345843	0.0249497	-0.955998	4.0915e-08	-0.724563	1.29146e-08
EF0958	-0.176665	0.370554	-0.441858	0.00046045	0.345843	0.0249497	-0.955998	4.0915e-08	-0.724563	1.29146e-08
EF0958	-0.176665	0.370554	-0.441858	0.00046045	0.345843	0.0249497	-0.955998	4.0915e-08	-0.724563	1.29146e-08
EF0958	-0.176665	0.370554	-0.441858	0.00046045	0.345843	0.0249497	-0.955998	4.0915e-08	-0.724563	1.29146e-08
EF0958	-0.176665	0.370554	-0.441858	0.00046045	0.345843	0.0249497	-0.955998	4.0915e-08	-0.724563	1.29146e-08
EF0958	-0.176665	0.370554	-0.441858	0.00046045	0.345843	0.0249497	-0.955998	4.0915e-08	-0.724563	1.29146e-08
EF0958	-0.176665	0.370554	-0.441858	0.00046045	0.345843	0.0249497	-0.955998	4.0915e-08	-0.724563	1.29146e-08
EF0958	-0.176665	0.370554	-0.441858	0.00046045	0.345843	0.0249497	-0.955998	4.0915e-08	-0.724563	1.29146e-08
EF0958	-0.176665	0.370554	-0.441858	0.00046045	0.345843	0.0249497	-0.955998	4.0915e-08	-0.724563	1.29146e-08
EF0958	-0.176665	0.370554	-0.441858	0.00046045	0.345843	0.0249497	-0.955998	4.0915e-08	-0.724563	1.29146e-08
EF0958	-0.176665	0.370554	-0.441858	0.00046045	0.345843	0.0249497	-0.955998	4.0915e-08	-0.724563	1.29146e-08
EF0958	-0.176665	0.370554	-0.441858	0.00046045	0.345843	0.0249497	-0.955998	4.0915e-08	-0.724563	1.29146e-08
EF0958	-0.176665	0.370554	-0.441858	0.00046045	0.345843	0.0249497	-0.955998	4.0915e-08	-0.724563	1.29146e-08
EF0958	-0.176665	0.370554	-0.441858	0.00046045	0.345843	0.0249497	-0.955998	4.0915e-08	-0.724563	1.29146e-08
EF0958	-0.176665	0.370554	-0.441858	0.00046045	0.345843	0.0249497	-0.955998	4.0915e-08	-0.724563	1.29146e-08
EF0958	-0.176665	0.370554	-0.441858	0.00046045	0.345843	0.0249497	-0.955998	4.0915e-08	-0.724563	1.29146e-08
EF0958	-0.176665	0.370554	-0.441858	0.00046045	0.345843	0.0249497	-0.955998	4.0915e-08	-0.724563	1.29146e-08
EF0958	-0.176665	0.370554	-0.441858	0.00046045	0.345843	0.0249497	-0.955998	4.0915e-08	-0.724563	1.29146e-08
EF0958	-0.176665	0.370554	-0.441858	0.00046045	0.345843	0.0249497	-0.955998	4.0915e-08	-0.724563	1.29146e-08
EF0958	-0.176665	0.370554	-0.441858	0.00046045	0.345843	0.0249497	-0.955998	4.0915e-08	-0.724563	1.29146e-08
EF0958	-0.176665	0.370554	-0.441858	0.00046045	0.345843	0.0249497	-0.955998	4.0915e-08	-0.724563	1.29146e-08
EF0958	-0.176665	0.370554	-0.441858	0.00046045	0.345843	0.0249497	-0.955998	4.0915e-08	-0.724563	1.29146e-08
EF0958	-0.176665	0.370554	-0.441858	0.00046045	0.345843	0.0249497	-0.955998	4.0915e-08	-0.724563	1.29146e-08
EF0958	-0.176665	0.370554	-0.441858	0.00046045	0.345843	0.0249497	-0.955998	4.0915e-08	-0.724563	1.29146e-08
EF0958	-0.176665	0.370554	-0.441858	0.00046045	0.345843	0.0249497	-0.955998	4.0915e-08	-0.724563	1.29146e-08
EF0958	-0.176665	0.370554	-0.441858	0.00046045	0.345843	0.0249497	-0.955998	4.0915e-08	-0.724563	1.29146e-08
EF0958	-0.176665	0.370554	-0.441858	0.00046045	0.345843	0.0249497	-0.955998	4.0915e-08	-0.724563	1.29146e-08
EF0958	-0.176665	0.370554	-0.441858	0.00046045	0.345843	0.0249497	-0.955998	4.0915e-08	-0.724563	1.29146e-08
EF0958	-0.176665	0.370554	-0.441858	0.00046045	0.345843	0.0249497	-0.955998	4.0915e-08	-0.724563	1.29146e-08
EF0958	-0.176665	0.370554	-0.441858	0.00046045	0.345843	0.0249497	-0.955998	4.0915e-08	-0.724563	1.29146e-08
EF0958	-0.176665	0.370554	-0.441858	0.00046045	0.345843	0.0249497	-0.955998	4.0915e-08	-0.724563	1.29146e-08
EF0958	-0.176665	0.370554	-0.441858	0.00046045	0.345843	0.0249497	-0.955998	4.0915e-08	-0.724563	1.29146e-08
EF0958	-0.176665	0.370554	-0.441858	0.00046045	0.345843	0.0249497	-0.955998	4.0915e-08	-0.724563	1.29146e-08
EF0958	-0.176665	0.370554	-0.441858	0.00046045	0.345843	0.0249497	-0.955998	4.0915e-08	-0.724563	1.29146e-08
EF0958	-0.176665	0.370554	-0.441858	0.00046045	0.345843	0.0249497	-0.955998	4.0915e-08	-0.724563	1.29146e-08
EF0958	-0.176665	0.370554	-0.441858	0.00046045	0.345843	0.0249497	-0.955998	4.0915e-08	-0.724563	1.29146e-08
EF0958	-0.176665	0.370554	-0.441858	0.00046045	0.345843	0.0249497	-0.955998	4.0915e-08	-0.724563	1.29146e-08
EF0958	-0.176665	0.370554	-0.441858	0.00046045	0.345843	0.0249497	-0.955998	4.0915e-08	-0.724563	1.29146e-08
EF0958	-0.176665	0.370554	-0.441858	0.00046045	0.345843	0.0249497	-0.955998	4.0915e-08	-0.724563	1.29146e-08
EF0958	-0.176665	0.370554	-0.441858	0.00046045	0.345843	0.0249497	-0.955998	4.0915e-08	-0.724563	1.29146e-08
EF0958	-0.176665	0.370554	-0.441858	0.00046045	0.345843	0.0249497	-0.955998	4.0915e-08	-0.724563	1.29146e-08
EF0958	-0.176665	0.370554	-0.441858	0.00046045	0.345843	0.0249497	-0.955998	4.0915e-08	-0.724563	1.29146e-08
EF0958	-0.176665	0.370554	-0.441858	0.00046045	0.345843	0.0249497	-0.955998	4.0915e-08	-0.724563	1.29146e-08
EF0958	-0.176665	0.370554	-0.441858	0.00046045	0.345843	0.0249497	-0.955998	4.0915e-08	-0.724563	1.29146e-08
EF0958	-0.176665	0.370554	-0.441858	0.00046045	0.345843	0.0249497	-0.955998	4.0915e-08	-0.724563	1.29146e-08
EF0958	-0.176665	0.370554	-0.441858	0.00046045	0.345843	0.0249497	-0.955998	4.0915e-08	-0.724563	1.29146e-08
EF0958	-0.176665	0.370554	-0.441858	0.00046045	0.345843	0.0249497	-0.955998	4.0915e-08	-0.724563	1.29146e-08
EF0958	-0.176665	0.370554	-0.441858	0.00046045	0.345843	0.0249497	-0.955998	4.0915e-08	-0.724563	1.29146e-08
EF0958	-0.176665	0.370554	-0.441858	0.00046045	0.345843	0.0249497	-0.955998	4.0915e-08	-0.724563	1.29146e-08
EF0958	-0.176665	0.370554	-0.441858	0.00046045	0.345843	0.0249497	-0.955998	4.0915e-08	-0.724563	1.29146e-08
EF0958	-0.176665	0.370554	-0.441858	0.00046045	0.345843	0.0249497	-0.955998	4.0915e-08	-0.724563	1.29146e-08
EF0958	-0.176665	0.370554	-0.441858	0.00046045	0.345843	0.0249497	-0.955998	4.0915e-08	-0.724563	1.29146e-08
EF0958	-0.176665	0.370554	-0.441858	0.00046045	0.345843	0.0249497	-0.955998	4.0915e-08	-0.724563	1.29146e-08
EF0958	-0.176665	0.370554	-0.441858	0.00046045	0.345843	0.0249497	-0.955998	4.0915e-08	-0.724563	1.29146e-08
EF0958	-0.176665	0.370554	-0.441858	0.00046045	0.345843	0.0249497	-0.955998	4.0915e-08	-0.724563	1.29146e-08
EF0958	-0.176665	0.370554	-0.441858	0.00046045	0.345843	0.0249497	-0.955998	4.0915e-08	-0.724563	1.29146e-08
EF0958	-0.176665	0.370554	-0.441858	0.00046045	0.345843	0.0249497	-0.955998	4.0915e-08	-0.724563	1.29146e-08
EF0958	-0.176665	0.370554	-0.441858	0.00046045	0.345843	0.0249497	-0.955998	4.0915e-08	-0.724563	1.29146e-08
EF0958	-0.176665	0.370554	-0.441858	0.00046045	0.345843	0.0249497	-0.955998	4.0915e-08	-0.724563	1.29146e-08
EF0958	-0.176665	0.370554	-0.441858	0.00046045	0.345843	0.0249497	-0.955998	4.0915e-08	-0.724563	1.29146e-08
EF0958	-0.176665	0.370554	-0.441858	0.00046045	0.345843	0.0249497	-0.955998	4.0915e-08	-0.724563	1.29146e-08
EF0958	-0.176665	0.370554	-0.441858	0.00046045	0.345843	0.0249497	-0.955998	4.0915e-08	-0.724563	1.29146e-08
EF0958	-0.176665	0.370554	-0.441858	0.00046045	0.345843	0.0249497	-0.955998	4.0915e-08	-0.724563	1.29146e-08
EF0958	-0.176665	0.370554	-0.441858	0.00046045	0.345843	0.0249497	-0.955998	4.0915e-08	-0.724563	1.29146e-08
EF0958	-0.176665	0.370554	-0.441858	0.00046045	0.345843	0.0249497	-0.955998	4.0915e-08	-0.724563	1.29146e-08
EF0958	-0.176665	0.370554	-0.441858	0.00046045	0.345843	0.0249497	-0.955998	4.0915e-08	-0.724563	1.29146e-08
EF0958	-0.176665	0.370554	-0.441858	0.00046045	0.345843	0.0249497	-0.955998	4.0915e-08	-0.724563	1.29146e-08
EF0958	-0.176665	0.370554	-0.441858	0.00046045	0.345843	0.0249497	-0.955998	4.0915e-08	-0.724563	1.29146e-08
EF0958	-0.176665	0.370554	-0.441858	0.00046045	0.345843	0.0249497	-0.955998	4.0915e-08	-0.724563	1.29146e-08
EF0958	-0.176665	0.370554	-0.441858	0.00046045	0.345843	0.0249497	-0.955998	4.0915e-08	-0.724563	1.29146e-08
EF0958	-0.176665	0.370554	-0.441858	0.00046045	0.345843	0.0249497	-0.955998	4.0915e-08	-0.724563	1.29146e-08
EF0958	-0.176665	0.370554	-0.441858	0.00046045	0.345843	0.0249497	-0.955998	4.0915e-08	-0.724563	1.29146e-08
EF0958	-0.176665	0.370554	-0.441858	0.00046045	0.345843	0.0249497	-0.955998	4.0915e-08	-0.724563	1.29146e-08
EF0958	-0.176665	0.370554	-0.441858	0.00046045	0.345843	0.0249497	-0.955998	4.0915e-08	-0.724563	1.29146e-08
EF0958	-0.176665	0.370554	-0.441858	0.00046045	0.345843	0.0249497	-0.955998	4.0915e-08	-0.724563	1.29146e-08
EF0958	-0.176665	0.370554	-0.441858	0.00046045	0.345843	0.0249497	-0.955998	4.0915e-08	-0.724563	1.29146e-08
EF0958	-0.176665	0.370554	-0.441858	0.00046045	0.345843	0.0249497	-0.955998	4.0915e-08	-0.724563	1.29146e-08
EF0958	-0.176665	0.370554	-0.441858	0.00046045	0.345843	0.0249497	-0.955998	4.0915e-08	-0.724563	1.29146e-08
EF0958	-0.176665	0.370554	-0.441858	0.00046045	0.345843	0.0249497	-0.955998	4.0915e-08	-0.724563	1.29146e-08
EF0958	-0.176665	0.370554	-0.441858	0.00046045	0.345843	0.0249497	-0.955998	4.0915e-08	-0.724563	1.29146e-08
EF0958	-0.176665	0.370554	-0.441858	0.00046045	0.345843	0.0249497	-0.955998	4.0915e-08	-0.724563	1.29146e-08
EF0958	-0.176665	0.370554	-0.441858	0.00046045	0.345843	0.0249497	-0.955998	4.0915e-08	-0.724563	1.29146e-08
EF0958	-0.176665	0.370554	-0.441858	0.00046045	0.345843	0.0249497	-0.955998	4.0915e-08	-0.724563	1.29146e-08
EF0958	-0.176665	0.370554	-0.441858	0.00046045	0.345843	0.0249497	-0.955998	4.0915e-08	-0.724563	1.29146e-08
EF0958	-0.176665	0.370554	-0.441858	0.00046045	0.345843	0.0249497	-0.955998	4.0915e-08	-0.724563	1.29146e-08
EF0958	-0.176665	0.370554	-0.441858	0.00046045	0.345843	0.0249497	-0.955998	4.0915e-08	-0.724563	1.29146e-08
EF0958	-0.176665	0.370554	-0.441858	0.00046045	0.345843	0.0249497	-0.955998	4.0915e-08	-0.724563	1.29146e-08
EF0958	-0.176665	0.370554	-0.441858	0.00046045	0.345843	0.0249497	-0.955998	4.0915e-08	-0.724563	1.29146e-08
EF0958	-0.176665	0.370554	-0.441858	0.00046045	0.345843	0.0249497	-0.955998	4.0915e-08	-0.724563	1.29146e-08
EF0958	-0.176665	0.370554	-0.441858	0.00046045	0.345843	0.0249497	-0.955998	4.0915e-08	-0.724563	1.29146e-08
EF0958	-0.176665	0.370554	-0.441858	0.00046045	0.345843	0.0249497	-0.955998	4.0915e-08	-0.724563	1.29146e-08
EF0958	-0.176665	0.370554	-0.441858	0.00046045	0.345843	0.0249497	-0.955998	4.0915e-08	-0.724563	1.29146e-08
EF0958	-0.176665	0.370554	-0.441858	0.00046045	0.345843	0.0249497	-0.955998	4.0915e-08	-0.724563	1.29146e-08
EF0958	-0.176665	0.370554	-0.441858	0.00046045	0.345843	0.0249497	-0.955998	4.0915e-08	-0.724563	1.29146e-08
EF0958	-0.176665	0.370554	-0.441858	0.00046045	0.345843	0.0249497	-0.955998	4.0915e-08	-0.724563	1.29146e-08
EF0958	-0.176665	0.370554	-0.441858	0.00046045	0.345843	0.0249497	-0.955998	4.0915e-08	-0.724563	1.29146e-08
EF0958	-0.176665	0.370554	-0.441858	0.00046045	0.345843	0.0249497	-0.955998	4.0915e-08	-0.724563	1.29146e-08
EF0958	-0.176665	0.370554	-0.441858	0.00046045	0.345843	0.0249497	-0.955998	4.0915e-08	-0.724563	1.29146e-08
EF0958	-0.176665	0.370554	-0.441858	0.00046045	0.345843	0.0249497	-0.955998	4.0915e-08	-0.724563	1.29146e-08
EF0958	-0.176665	0.370554	-0.441858	0.00046045	0.345843	0.0249497	-0.955998	4.0915e-08	-0.724563	1.29146e-08
EF0958	-0.176665	0.370554	-0.441858	0.00046045	0.345843	0.0249497	-0.955998	4.0915e-08	-0.724563	1.29146e-08
EF0958	-0.176665	0.370554	-0.441858	0.00046045	0.345843	0.0249497	-0.955998	4.0915e-08	-0.724563	1.29146e-08
EF0958	-0.176665	0.370554	-0.441858	0.00046045	0.345843	0.0249497	-0.955998	4.0915e-08	-0.724563	1.29146e-08
EF0958	-0.176665	0.370554	-0.441858	0.00046045	0.345843	0.0249497	-0.955998	4.0915e-08	-0.724563	1.29146e-08
EF0958	-0.176665	0.370554	-0.441858	0.00046045	0.345843	0.0249497	-0.955998	4.0915e-08	-0.724563	1.29146e-08
EF0958	-0.176665	0.370554	-0.441858	0.00046045	0.345843	0.0249497	-0.955998	4.0915e-08	-0.724563	1.29146e-08
EF0958	-0.176665	0.370554	-0.441858	0.00046045	0.345843	0.0249497	-0.955998	4.0915e-08	-0.724563	1.29146e-08
EF0958	-0.176665	0.370554	-0.441858	0.00046045	0.345843	0.0249497	-0.955998	4.0915e-08	-0.724563	1.29146e-08
EF0958	-0.176665	0.370554	-0.441858	0.00046045	0.345843	0.0249497	-0.955998	4.0915e-08	-0.724563	1.29146e-08
EF0958	-0.176665	0.370554	-0.441858	0.00046045	0.345843	0.0249497	-0.955998	4.0915e-08	-0.724563	1.29146e-08
EF0958	-0.176665	0.370554	-0.441858	0.00046045	0.345843	0.0249497	-0.955998	4.0915e-08	-0.724563	1.29146e-08
EF0958	-0.176665	0.370554	-0.441858	0.00046045	0.345843	0.0249497	-0.955998	4.0915e-08	-0.724563	1.29146e-08
EF0958	-0.176665	0.370554	-0.441858	0.00046045	0.345843	0.0249497	-0.955998	4.0915e-08	-0.724563	1.29146e-08
EF0958	-0.176665	0.370554	-0.441858	0.00046045	0.345843	0.0249497	-0.955998	4.0915e-08	-0.724563	1.29146e-08
EF0958	-0.176665	0.370554	-0.441858	0.00046045	0.345843	0.0249497	-0.955998	4.0915e-08	-0.724563	1.29146e-08
EF0958	-0.176665	0.370554	-0.441858	0.00046045	0.345843	0.0249497	-0.955998	4.0915e-08	-0.724563	1.29146e-08
EF0958	-0.176665	0.370554	-0.441858	0.00046045	0.345843	0.0249497	-0.955998	4.0915e-08	-0.724563	1.29146e-08
EF0958	-0.176665	0.370554	-0.441858	0.00046045	0.345843	0.0249497	-0.955998	4.0915e-08	-0.724563	1.29146e-08
EF0958	-0.176665	0.370554	-0.441858	0.00046045	0.345843	0.0249497	-0.955998	4.0915e-08	-0.724563	1.29146e-08
EF0958	-0.176665	0.370554	-0.441858	0.00046045	0.345843	0.0249497	-0.955998	4.0915e-08	-0.724563	1.29146e-08
EF0958	-0.176665	0.370554	-0.441858	0.00046045	0.345843	0.0249497	-0.955998	4.0915e-08	-0.724563	1.29146e-08
EF0958	-0.176665	0.370554	-0.441858	0.00046045	0.345843	0.0249497	-0.955998	4.0915e-08	-0.724563	1.29146e-08
EF0958	-0.176665	0.370554	-0.441858	0.00046045	0.345843	0.0249497	-0.955998	4.0915e-08	-0.724563	1.29146e-08
EF0958	-0.176665	0.370554	-0.441858	0.00046045	0.345843	0.0249497	-0.955998	4.0915e-08	-0.724563	1.29146e-08
EF0958	-0.176665	0.370554	-0.441858	0.00046045	0.345843	0.0249497	-0.955998	4.0915e-08	-0.724563	1.29146e-08
EF0958	-0.176665	0.370554	-0.441858	0.00046045	0.345843	0.0249497	-0.955998	4.0915e-08	-0.724563	1.29146e-08
EF0958	-0.176665	0.370554	-0.441858	0.00046045	0.345843	0.0249497	-0.955998	4.0915e-08	-0.724563	1.29146e-08
EF0958	-0.176665	0.370554	-0.441858	0.00046045	0.345843	0.0249497	-0.955998	4.0915e-08	-0.724563	1.29146e-08
EF0958	-0.176665	0.370554	-0.441858	0.00046045	0.345843	0.0249497	-0.955998	4.0915e-08	-0.724563	1.29146e-08
EF0958	-0.176665	0.370554	-0.441858	0.00046045	0.345843	0.0249497	-0.955998	4.0915e-08	-0.724563	1.29146e-08
EF0958	-0.176665	0.370554	-0.441858	0.00046045	0.345843	0.0249497	-0.955998	4.0915e-08	-0.724563	1.29146e-08
EF0958	-0.176665	0.370554	-0.441858	0.00046045	0.345843	0.0249497	-0.955998	4.0915e-08	-0.724563	1.29146e-08
EF0958	-0.176665	0.370554	-0.441858	0.00046045	0.345843	0.0249497	-0.955998	4.0915e-08	-0.724563	1.29146e-08
EF0958	-0.176665	0.370554	-0.441858	0.00046045	0.345843	0.0249497	-0.955998	4.0915e-08	-0.724563	1.29146e-08
EF0958	-0.176665	0.370554	-0.441858	0.00046045	0.345843	0.0249497	-0.955998	4.0915e-08	-0.724563	1.29146e-08
EF0958	-0.176665	0.370554	-0.441858	0.00046045	0.345843	0.0249497	-0.955998	4.0915e-08	-0.724563	1.29146e-08
EF0958	-0.176665	0.370554	-0.441858	0.00046045	0.345843	0.0249497	-0.955998	4.0915e-08	-0.724563	1.29146e-08
EF0958	-0.176665	0.370554	-0.441858	0.00046045	0.345843	0.0249497	-0.955998	4.0915e-08	-0.724563	1.29146e-08
EF0958	-0.176665	0.370554	-0.441858	0.00046045	0.345843	0.0249497	-0.955998	4.0915e-08	-0.724563	1.29146e-08
EF0958	-0.176665	0.370554	-0.441858	0.00046045	0.345843	0.0249497	-0.955998	4.0915e-08	-0.724563	1.29146e-08
EF0958	-0.176665	0.370554	-0.441858	0.00046045	0.345843	0.0249497	-0.955998	4.0915e-08	-0.724563	1.29146e-08
EF0958	-0.176665	0.370554	-0.441858	0.00046045	0.345843	0.0249497	-0.955998	4.0915e-08	-0.724563	1.29146e-08
EF0958	-0.176665	0.370554	-0.441858	0.00046045	0.345843	0.0249497	-0.955998	4.0915e-08	-0.724563	1.29146e-08
EF0958	-0.176665	0.370554	-0.441858	0.00046045	0.345843	0.0249497	-0.955998	4.0915e-08	-0.724563	1.29146e-08
EF0958	-0.176665	0.370554	-0.441858	0.00046045	0.345843	0.0249497	-0.955998	4.0915e-08	-0.724563	1.29146e-08
EF0958	-0.176665	0.370554	-0.441858	0.00046045	0.345843	0.0249497	-0.955998	4.0915e-08	-0.724563	1.29146e-08
EF0958	-0.176665	0.370554	-0.441858	0.00046045	0.345843	0.0249497	-0.955998	4.0915e-08	-0.724563	1.29146e-08
EF0958	-0.176665	0.370554	-0.441858	0.00046045	0.345843	0.0249497	-0.955998	4.0915e-08	-0.724563	1.29146e-08
EF0958	-0.176665	0.370554	-0.441858	0.00046045	0.345843	0.0249497	-0.955998	4.0915e-08	-0.724563	1.29146e-08
EF0958	-0.176665	0.370554	-0.441858	0.00046045	0.345843	0.0249497	-0.955998	4.0915e-08	-0.724563	1.29146e-08
EF0958	-0.176665	0.370554	-0.441858	0.00046045	0.345843	0.0249497	-0.955998	4.0915e-08	-0.724563	1.29146e-08
EF0958	-0.176665	0.370554	-0.441858	0.00046045	0.345843	0.0249497	-0.955998	4.0915e-08	-0.724563	1.29146e-08
EF0958	-0.176665	0.370554	-0.441858	0.00046045	0.345843	0.0249497	-0.955998	4.0915e-08	-0.724563	1.29146e-08
EF0958	-0.176665	0.370554	-0.441858	0.00046045	0.345843	0.0249497	-0.955998	4.0915e-08	-0.724563	1.29146e-08
EF0958	-0.176665	0.370554	-0.441858	0.00046045	0.345843	0.0249497	-0.955998	4.0915e-08	-0.724563	1.29146e-08
EF0958	-0.176665	0.370554	-0.441858	0.00046045	0.345843	0.0249497	-0.955998	4.0915e-08	-0.724563	1.29146e-08
EF0958	-0.176665	0.370554	-0.441858	0.00046045	0.345843	0.0249497	-0.955998	4.0915e-08	-0.724563	1.29146e-08
EF0958	-0.176665	0.370554	-0.441858	0.00046045	0.345843	0.0249497	-0.955998	4.0915e-08	-0.724563	1.29146e-08
EF0958	-0.176665	0.370554	-0.441858	0.00046045	0.345843	0.0249497	-0.955998	4.0915e-08	-0.724563	1.29146e-08
EF0958	-0.176665	0.370554	-0.441858	0.00046045	0.345843	0.0249497	-0.955998	4.0915e-08	-0.724563	1.29146e-08
EF0958	-0.176665	0.370554	-0.441858	0.00046045	0.345843	0.0249497	-0.955998	4.0915e-08	-0.724563	1.29146e-08
EF0958	-0.176665	0.370554	-0.441858	0.00046045	0.345843	0.0249497	-0.955998	4.0915e-08	-0.724563	1.29146e-08
EF0958	-0.176665	0.370554	-0.441858	0.00046045	0.345843	0.0249497	-0.955998	4.0915e-08	-0.724563	1.29146e-08
EF0958	-0.176665	0.370554	-0.441858	0.00046045	0.345843	0.0249497	-0.955998	4.0915e-08	-0.724563	1.29146e-08
EF0958	-0.176665	0.370554	-0.441858	0.00046045	0.345843	0.0249497	-0.955998	4.0915e-08	-0.724563	1.29146e-08
EF0958	-0.176665	0.370554	-0.441858	0.00046045	0.345843	0.0249497	-0.955998	4.0915e-08	-0.724563	1.29146e-08
EF0958	-0.176665	0.370554	-0.441858	0.00046045	0.345843	0.0249497	-0.955998	4.0915e-08	-0.724563	1.29146e-08
EF0958	-0.176665	0.370554	-0.441858	0.00046045	0.345843	0.0249497	-0.955998	4.0915e-08	-0.724563	1.29146e-08
EF0958	-0.176665	0.370554	-0.441858	0.00046045	0.345843	0.0249497	-0.955998	4.0915e-08	-0.724563	1.29146e-08
EF0958	-0.176665	0.370554	-0.441858	0.00046045	0.345843	0.0249497	-0.955998	4.0915e-08	-0.724563	1.29146e-08
EF0958	-0.176665	0.370554	-0.441858	0.00046045	0.345843	0.0249497	-0.955998	4.0915e-08	-0.724563	1.29146e-08
EF0958	-0.176665	0.370554	-0.441858	0.00046045	0.345843	0.0249497	-0.955998	4.0915e-08	-0.724563	1.29146e-08
EF0958	-0.176665	0.370554	-0.441858	0.00046045	0.345843	0.0249497	-0.955998	4.0915e-08	-0.724563	1.29146e-08
EF0958	-0.176665	0.370554	-0.441858	0.00046045	0.345843	0.0249497	-0.955998	4.0915e-08	-0.724563	1.29146e-08
EF0958	-0.176665	0.370554	-0.441858	0.00046045	0.345843	0.0249497	-0.955998	4.0915e-08	-0.724563	1.29146e-08
EF0958	-0.176665	0.370554	-0.441858	0.00046045	0.345843	0.0249497	-0.955998	4.0915e-08	-0.724563	1.29146e-08
EF0960	0.303016	0.0155616	-0.50158	5.03311e-08	0.0523431	0.696632	-0.045342	0.769231	-0.434122	0.000138205
EF0961	0.547032	2.56598e-05	-0.204284	0.0306809	0.465666	9.21534e-05	0.0301314	0.838818	-0.706197	1.42341e-09
EF0962	0.769932	3.26241e-08	-0.764134	1.65375e-13	-0.0681257	0.58813	0.414777	0.000812473	-0.385454	0.000249063
EF0963	0.166999	0.230875	-0.503051	3.70234e-08	0.00882603	0.944127	0.282541	0.0567899	-0.526361	0.000135402
EF0964	0.196674	0.0878976	-0.201755	0.00723871	0.116972	0.263626	0.175789	0.129862	-0.373994	0.000195024
EF0966	0.116635	0.219692	-0.152019	0.0300347	0.132626	0.134461	-0.0786408	0.399811	-0.321176	0.000437929
EF0968	-0.309398	0.100375	1.61954	2.66888e-16	0.118579	0.526965	-0.451497	0.000126344	1.20816	1.27376e-34
EF0969	-0.238877	0.212915	1.50844	7.42891e-16	0.0990161	0.617249	-0.34499	0.00189126	1.20692	4.59444e-42
EF0970	-0.249938	0.177453	1.17097	1.40906e-09	0.111345	0.548541	-0.471657	7.47884e-05	0.979299	3.07523e-22
EF0971	1.79726	2.30281e-27	-1.06624	1.10388e-32	0.0903296	0.508537	1.31652	1.87035e-13	-0.55738	8.67845e-06
EF0972	0.476456	0.074244	-0.820649	4.56312e-05	-0.295939	0.185266	-0.187445	0.214321	-0.174549	0.1945
EF0972	0.476456	0.074244	-0.820649	4.56312e-05	-0.295939	0.185266	-0.187445	0.214321	-0.174549	0.1945
EF0972	0.476456	0.074244	-0.820649	4.56312e-05	-0.295939	0.185266	-0.187445	0.214321	-0.174549	0.1945
EF0972	0.476456	0.074244	-0.820649	4.56312e-05	-0.295939	0.185266	-0.187445	0.214321	-0.174549	0.1945
EF0973	-0.294584	0.101474	0.669516	9.25866e-05	0.299779	0.0956907	-0.110565	0.267691	0.240007	0.00384147
EF0973	-0.294584	0.101474	0.669516	9.25866e-05	0.299779	0.0956907	-0.110565	0.267691	0.240007	0.00384147
EF0973	-0.294584	0.101474	0.669516	9.25866e-05	0.299779	0.0956907	-0.110565	0.267691	0.240007	0.00384147
EF0973	-0.294584	0.101474	0.669516	9.25866e-05	0.299779	0.0956907	-0.110565	0.267691	0.240007	0.00384147
EF0974	-0.379475	1.65186e-05	0.385728	2.89738e-06	0.257088	0.0105118	-0.288998	0.000119524	0.052959	0.451715
EF0974	-0.379475	1.65186e-05	0.385728	2.89738e-06	0.257088	0.0105118	-0.288998	0.000119524	0.052959	0.451715
EF0974	-0.379475	1.65186e-05	0.385728	2.89738e-06	0.257088	0.0105118	-0.288998	0.000119524	0.052959	0.451715
EF0974	-0.379475	1.65186e-05	0.385728	2.89738e-06	0.257088	0.0105118	-0.288998	0.000119524	0.052959	0.451715
EF0976	0.443438	9.49991e-07	0.232719	0.00509082	-0.0528499	0.574968	0.0317505	0.640993	0.346603	5.13052e-07
EF0977	0.10472	0.326751	0.0494171	0.594036	-0.119062	0.250903	-0.482492	8.15171e-11	0.347587	3.48213e-07
EF0978	0.658798	8.70688e-20	0.278779	0.000841873	0.0484762	0.652239	0.87854	3.2425e-20	0.101026	0.229299
EF0979	0.219104	0.0118057	0.35638	1.0933e-05	-0.0114146	0.909377	0.637278	5.17031e-17	0.252109	0.00106066
EF0980	0.0371517	0.706423	0.299145	0.000194572	-0.0183306	0.853105	0.664624	4.52674e-07	0.159516	0.0804331
EF0981	-0.0489419	0.616839	0.275745	1.33457e-05	-0.0420681	0.691896	0.312153	3.92754e-05	0.179538	0.0135323
EF0982	0.100773	0.307672	0.0456831	0.596195	0.0499192	0.625414	-0.233626	0.00243469	0.017015	0.811846
EF0983	0.293992	0.00411375	0.0556959	0.488902	-0.0196525	0.839027	0.222491	0.0352976	0.10681	0.239287
EF0984	0.113293	0.200263	0.210205	0.00896914	0.0768473	0.42466	0.0708578	0.311417	0.0687644	0.314257
EF0986	-0.333287	8.67552e-06	0.249705	0.000164934	0.0303784	0.725914	0.288528	0.00155099	0.242934	0.00361188
EF0987	0.433442	0.00221622	-0.451239	5.70662e-05	0.131278	0.284073	-0.559336	7.94309e-06	-0.069884	0.470503
EF0988	0.925965	3.81348e-21	0.473145	2.53663e-09	-0.0654046	0.517933	0.460212	6.38023e-07	0.61215	5.59649e-10
EF0988	0.925965	3.81348e-21	0.473145	2.53663e-09	-0.0654046	0.517933	0.460212	6.38023e-07	0.61215	5.59649e-10
EF0989	0.560897	9.50819e-14	0.693483	4.24223e-28	-0.291296	0.00353065	0.428517	8.34853e-08	0.98235	1.92622e-40
EF0989	0.560897	9.50819e-14	0.693483	4.24223e-28	-0.291296	0.00353065	0.428517	8.34853e-08	0.98235	1.92622e-40
EF0990	0.294612	6.30437e-05	0.890451	3.58728e-48	-0.391723	5.48828e-06	0.295947	0.00107871	1.19827	7.10933e-37
EF0990	0.294612	6.30437e-05	0.890451	3.58728e-48	-0.391723	5.48828e-06	0.295947	0.00107871	1.19827	7.10933e-37
EF0991	0.0800563	0.628565	0.410152	0.010305	-0.119555	0.490777	-0.012525	0.898809	0.427779	1.40376e-07
EF0991	0.0800563	0.628565	0.410152	0.010305	-0.119555	0.490777	-0.012525	0.898809	0.427779	1.40376e-07
EF0992	0.186297	0.0472199	0.20819	0.0141713	0.0774015	0.45179	-0.29525	0.00184941	0.203411	0.00447413
EF0992	0.186297	0.0472199	0.20819	0.0141713	0.0774015	0.45179	-0.29525	0.00184941	0.203411	0.00447413
EF0993	0.432056	1.13565e-11	1.29575	7.41252e-116	-0.198962	0.0479441	0.649609	5.91124e-16	1.5557	1.87174e-83
EF0993	0.432056	1.13565e-11	1.29575	7.41252e-116	-0.198962	0.0479441	0.649609	5.91124e-16	1.5557	1.87174e-83
EF0994	0.215556	0.0181269	0.645624	5.78668e-14	-0.243851	0.021861	0.537535	1.08465e-09	0.883366	1.30919e-25
EF0994	0.215556	0.0181269	0.645624	5.78668e-14	-0.243851	0.021861	0.537535	1.08465e-09	0.883366	1.30919e-25
EF0995	-0.0350804	0.699079	0.467202	1.62552e-08	-0.300662	0.0117717	0.411719	2.43059e-05	0.65687	2.6213e-14
EF0995	-0.0350804	0.699079	0.467202	1.62552e-08	-0.300662	0.0117717	0.411719	2.43059e-05	0.65687	2.6213e-14
EF0996	0.247763	0.171729	0.300033	0.0983786	-0.0310304	0.867743	0.310863	0.00454125	0.200495	0.0225647
EF0996	0.247763	0.171729	0.300033	0.0983786	-0.0310304	0.867743	0.310863	0.00454125	0.200495	0.0225647
EF0997	-0.029743	0.8729	0.370101	0.0435081	-0.0230356	0.902985	0.0354523	0.749028	0.225855	0.00850609
EF0997	-0.029743	0.8729	0.370101	0.0435081	-0.0230356	0.902985	0.0354523	0.749028	0.225855	0.00850609
EF0998	-0.051211	0.778827	0.358921	0.0373822	-0.0588878	0.745868	0.303481	0.00303679	0.439947	6.62184e-07
EF0998	-0.051211	0.778827	0.358921	0.0373822	-0.0588878	0.745868	0.303481	0.00303679	0.439947	6.62184e-07
EF0999	-0.105527	0.493271	0.0782856	0.619041	-0.178096	0.296244	0.180518	0.0723387	0.243936	0.00501812
EF0999	-0.105527	0.493271	0.0782856	0.619041	-0.178096	0.296244	0.180518	0.0723387	0.243936	0.00501812
EF1000	-0.260139	0.000348961	-0.26443	1.18521e-05	-0.340796	6.75412e-06	0.0164187	0.843381	0.253319	0.00110491
EF1000	-0.260139	0.000348961	-0.26443	1.18521e-05	-0.340796	6.75412e-06	0.0164187	0.843381	0.253319	0.00110491
EF1001	-0.225607	0.00272702	-0.587718	5.36994e-25	-0.130937	0.121112	-0.196504	0.0192098	-0.21836	0.00691381
EF1001	-0.225607	0.00272702	-0.587718	5.36994e-25	-0.130937	0.121112	-0.196504	0.0192098	-0.21836	0.00691381
EF1002	0.234284	0.180788	-0.147833	0.405529	0.0266682	0.882818	0.0458625	0.637443	-0.106908	0.160076
EF1002	0.234284	0.180788	-0.147833	0.405529	0.0266682	0.882818	0.0458625	0.637443	-0.106908	0.160076
EF1003	-0.136643	0.472697	0.463558	0.0135448	0.0573418	0.766241	-0.0417317	0.679706	0.300332	9.03566e-05
EF1004	-0.14546	0.219379	-0.0439618	0.786928	0.0066057	0.966615	0.0344332	0.696034	-0.054637	0.465749
EF1005	0.0460212	0.50188	0.517844	3.61571e-21	-0.0309885	0.758144	0.754701	5.64429e-18	0.540088	4.39452e-13
EF1006	0.131358	0.125754	-1.17058	4.11102e-41	-0.0924285	0.320725	0.354994	0.000622143	-0.966739	7.77753e-26
EF1008	-0.170991	0.0704802	0.086669	0.312886	-0.0577055	0.569145	0.27017	0.000354372	0.0393067	0.590934
EF1009	-0.331895	0.000282946	-0.0145867	0.861049	-0.163464	0.126802	-0.0150268	0.862255	0.0136152	0.874171
EF1010	0.0681982	0.417413	0.0961016	0.190898	-0.0874327	0.314311	-0.127663	0.140899	0.323929	8.52803e-05
EF1013	-2.0276	5.40286e-102	-1.08309	1.11981e-40	-0.496714	2.74248e-06	-0.929486	3.04943e-18	-0.809821	1.26539e-17
EF1013	-2.0276	5.40286e-102	-1.08309	1.11981e-40	-0.496714	2.74248e-06	-0.929486	3.04943e-18	-0.809821	1.26539e-17
EF1013	-2.0276	5.40286e-102	-1.08309	1.11981e-40	-0.496714	2.74248e-06	-0.929486	3.04943e-18	-0.809821	1.26539e-17
EF1013	-2.0276	5.40286e-102	-1.08309	1.11981e-40	-0.496714	2.74248e-06	-0.929486	3.04943e-18	-0.809821	1.26539e-17
EF1013	-2.0276	5.40286e-102	-1.08309	1.11981e-40	-0.496714	2.74248e-06	-0.929486	3.04943e-18	-0.809821	1.26539e-17
EF1013	-2.0276	5.40286e-102	-1.08309	1.11981e-40	-0.496714	2.74248e-06	-0.929486	3.04943e-18	-0.809821	1.26539e-17
EF1013	-2.0276	5.40286e-102	-1.08309	1.11981e-40	-0.496714	2.74248e-06	-0.929486	3.04943e-18	-0.809821	1.26539e-17
EF1013	-2.0276	5.40286e-102	-1.08309	1.11981e-40	-0.496714	2.74248e-06	-0.929486	3.04943e-18	-0.809821	1.26539e-17
EF1014	-3.43983	1.06503e-38	-1.83335	3.68004e-11	-0.953749	0.0042704	-2.21475	2.48818e-25	-1.40679	7.23754e-11
EF1014	-3.43983	1.06503e-38	-1.83335	3.68004e-11	-0.953749	0.0042704	-2.21475	2.48818e-25	-1.40679	7.23754e-11
EF1015	-2.94019	2.8992e-32	-1.0604	7.29009e-05	-0.0720099	0.878801	-2.64486	4.29758e-21	-1.2067	1.40138e-06
EF1015	-2.94019	2.8992e-32	-1.0604	7.29009e-05	-0.0720099	0.878801	-2.64486	4.29758e-21	-1.2067	1.40138e-06
EF1016	-2.74136	5.21605e-42	-0.551331	0.0243644	0.353975	0.250579	-2.95975	4.50166e-46	-0.886934	0.00106477
EF1016	-2.74136	5.21605e-42	-0.551331	0.0243644	0.353975	0.250579	-2.95975	4.50166e-46	-0.886934	0.00106477
EF1017	-0.358858	0.0557288	0.709459	5.57579e-05	0.0638998	0.731628	-0.400851	0.000371258	0.221689	0.00869281
EF1017	-0.358858	0.0557288	0.709459	5.57579e-05	0.0638998	0.731628	-0.400851	0.000371258	0.221689	0.00869281
EF1018	-0.663499	0.000299444	0.57837	0.000595701	0.00455392	0.979772	-0.590968	2.28047e-08	0.151943	0.0807964
EF1018	-0.663499	0.000299444	0.57837	0.000595701	0.00455392	0.979772	-0.590968	2.28047e-08	0.151943	0.0807964
EF1019	-1.70571	1.13947e-18	-0.264774	0.12179	-0.38314	0.0319297	-1.60013	4.38873e-51	-0.307022	0.000175403
EF1020	-2.76182	3.52018e-294	-0.642139	2.31219e-17	-0.550622	2.87916e-09	-2.88017	1.22494e-292	-0.677642	1.12987e-16
EF1021	-1.1331	3.44475e-41	0.153878	0.0543179	0.199776	0.0460792	-2.28514	3.62915e-168	-0.176221	0.0486876
EF1022	-0.359596	0.00681323	0.509336	8.21676e-05	0.480455	0.00103253	-0.391714	3.49665e-06	-0.219534	0.00964411
EF1022	-0.359596	0.00681323	0.509336	8.21676e-05	0.480455	0.00103253	-0.391714	3.49665e-06	-0.219534	0.00964411
EF1023	0.504943	3.51138e-06	0.294447	0.00656108	0.191814	0.0613856	0.587651	1.61007e-07	0.0178169	0.865173
EF1024	-0.396951	0.000117231	0.431591	2.84843e-06	-0.158816	0.13844	-0.177197	0.179183	0.418073	0.000148131
EF1024	-0.396951	0.000117231	0.431591	2.84843e-06	-0.158816	0.13844	-0.177197	0.179183	0.418073	0.000148131
EF1024	-0.396951	0.000117231	0.431591	2.84843e-06	-0.158816	0.13844	-0.177197	0.179183	0.418073	0.000148131
EF1024	-0.396951	0.000117231	0.431591	2.84843e-06	-0.158816	0.13844	-0.177197	0.179183	0.418073	0.000148131
EF1024	-0.396951	0.000117231	0.431591	2.84843e-06	-0.158816	0.13844	-0.177197	0.179183	0.418073	0.000148131
EF1025	0.224043	0.140953	0.293799	0.0268239	-0.204891	0.105146	0.519762	8.61361e-05	0.587514	8.09202e-07
EF1026	0.0870068	0.470107	0.519517	9.3538e-08	0.169708	0.113884	-0.173089	0.158857	0.297895	0.0138438
EF1028	-0.0330429	0.736065	-0.160462	0.0232214	0.208994	0.0162795	0.539765	6.92387e-08	-0.0630396	0.451988
EF1028	-0.0330429	0.736065	-0.160462	0.0232214	0.208994	0.0162795	0.539765	6.92387e-08	-0.0630396	0.451988
EF1028	-0.0330429	0.736065	-0.160462	0.0232214	0.208994	0.0162795	0.539765	6.92387e-08	-0.0630396	0.451988
EF1028	-0.0330429	0.736065	-0.160462	0.0232214	0.208994	0.0162795	0.539765	6.92387e-08	-0.0630396	0.451988
EF1029	0.276744	0.0752402	1.45177	3.76125e-23	-0.122188	0.410887	-0.271494	0.066989	1.6093	2.96413e-23
EF1029	0.276744	0.0752402	1.45177	3.76125e-23	-0.122188	0.410887	-0.271494	0.066989	1.6093	2.96413e-23
EF1029	0.276744	0.0752402	1.45177	3.76125e-23	-0.122188	0.410887	-0.271494	0.066989	1.6093	2.96413e-23
EF1029	0.276744	0.0752402	1.45177	3.76125e-23	-0.122188	0.410887	-0.271494	0.066989	1.6093	2.96413e-23
EF1030	-0.0853048	0.6153	0.411032	0.00361031	-0.385755	0.0137617	0.128443	0.387413	0.698695	5.76804e-07
EF1030	-0.0853048	0.6153	0.411032	0.00361031	-0.385755	0.0137617	0.128443	0.387413	0.698695	5.76804e-07
EF1030	-0.0853048	0.6153	0.411032	0.00361031	-0.385755	0.0137617	0.128443	0.387413	0.698695	5.76804e-07
EF1030	-0.0853048	0.6153	0.411032	0.00361031	-0.385755	0.0137617	0.128443	0.387413	0.698695	5.76804e-07
EF1031	-0.052455	0.841056	-0.241391	0.198736	-0.0723883	0.753449	-0.630836	0.000586104	0.0778024	0.679709
EF1031	-0.052455	0.841056	-0.241391	0.198736	-0.0723883	0.753449	-0.630836	0.000586104	0.0778024	0.679709
EF1031	-0.052455	0.841056	-0.241391	0.198736	-0.0723883	0.753449	-0.630836	0.000586104	0.0778024	0.679709
EF1031	-0.052455	0.841056	-0.241391	0.198736	-0.0723883	0.753449	-0.630836	0.000586104	0.0778024	0.679709
EF1032	-0.44142	3.07394e-08	-0.181896	0.00671502	-0.124745	0.151296	-0.0791145	0.401154	-0.0601307	0.474607
EF1033	0.434647	7.08755e-06	-0.093869	0.201414	-0.0987824	0.426434	0.725006	1.28029e-07	-0.19576	0.151254
EF1034	-0.0832565	0.560677	0.821485	3.02551e-09	0.28018	0.0273319	0.390679	0.0302338	0.456102	0.000489275
EF1035	-0.0264126	0.830586	0.464013	4.33211e-05	0.00033042	0.993753	0.468714	0.0025188	-0.00563548	0.966274
EF1036	-0.522387	4.96244e-06	-0.93707	1.24803e-33	0.0438367	0.692804	-0.223102	0.0544535	-1.09343	1.30013e-33
EF1037	-0.0808326	0.399071	-0.861439	2.64137e-24	-0.0867096	0.397733	-0.0649615	0.411198	-0.645681	1.24866e-19
EF1037	-0.0808326	0.399071	-0.861439	2.64137e-24	-0.0867096	0.397733	-0.0649615	0.411198	-0.645681	1.24866e-19
EF1038	-0.41962	0.0204205	-1.34803	5.93876e-27	-0.128185	0.45532	-0.0933019	0.639517	-0.936637	1.9002e-10
EF1038	-0.41962	0.0204205	-1.34803	5.93876e-27	-0.128185	0.45532	-0.0933019	0.639517	-0.936637	1.9002e-10
EF1038	-0.41962	0.0204205	-1.34803	5.93876e-27	-0.128185	0.45532	-0.0933019	0.639517	-0.936637	1.9002e-10
EF1038	-0.41962	0.0204205	-1.34803	5.93876e-27	-0.128185	0.45532	-0.0933019	0.639517	-0.936637	1.9002e-10
EF1038	-0.41962	0.0204205	-1.34803	5.93876e-27	-0.128185	0.45532	-0.0933019	0.639517	-0.936637	1.9002e-10
EF1038	-0.41962	0.0204205	-1.34803	5.93876e-27	-0.128185	0.45532	-0.0933019	0.639517	-0.936637	1.9002e-10
EF1038	-0.41962	0.0204205	-1.34803	5.93876e-27	-0.128185	0.45532	-0.0933019	0.639517	-0.936637	1.9002e-10
EF1038	-0.41962	0.0204205	-1.34803	5.93876e-27	-0.128185	0.45532	-0.0933019	0.639517	-0.936637	1.9002e-10
EF1038	-0.41962	0.0204205	-1.34803	5.93876e-27	-0.128185	0.45532	-0.0933019	0.639517	-0.936637	1.9002e-10
EF1038	-0.41962	0.0204205	-1.34803	5.93876e-27	-0.128185	0.45532	-0.0933019	0.639517	-0.936637	1.9002e-10
EF1038	-0.41962	0.0204205	-1.34803	5.93876e-27	-0.128185	0.45532	-0.0933019	0.639517	-0.936637	1.9002e-10
EF1038	-0.41962	0.0204205	-1.34803	5.93876e-27	-0.128185	0.45532	-0.0933019	0.639517	-0.936637	1.9002e-10
EF1038	-0.41962	0.0204205	-1.34803	5.93876e-27	-0.128185	0.45532	-0.0933019	0.639517	-0.936637	1.9002e-10
EF1038	-0.41962	0.0204205	-1.34803	5.93876e-27	-0.128185	0.45532	-0.0933019	0.639517	-0.936637	1.9002e-10
EF1038	-0.41962	0.0204205	-1.34803	5.93876e-27	-0.128185	0.45532	-0.0933019	0.639517	-0.936637	1.9002e-10
EF1038	-0.41962	0.0204205	-1.34803	5.93876e-27	-0.128185	0.45532	-0.0933019	0.639517	-0.936637	1.9002e-10
EF1038	-0.41962	0.0204205	-1.34803	5.93876e-27	-0.128185	0.45532	-0.0933019	0.639517	-0.936637	1.9002e-10
EF1038	-0.41962	0.0204205	-1.34803	5.93876e-27	-0.128185	0.45532	-0.0933019	0.639517	-0.936637	1.9002e-10
EF1038	-0.41962	0.0204205	-1.34803	5.93876e-27	-0.128185	0.45532	-0.0933019	0.639517	-0.936637	1.9002e-10
EF1038	-0.41962	0.0204205	-1.34803	5.93876e-27	-0.128185	0.45532	-0.0933019	0.639517	-0.936637	1.9002e-10
EF1038	-0.41962	0.0204205	-1.34803	5.93876e-27	-0.128185	0.45532	-0.0933019	0.639517	-0.936637	1.9002e-10
EF1038	-0.41962	0.0204205	-1.34803	5.93876e-27	-0.128185	0.45532	-0.0933019	0.639517	-0.936637	1.9002e-10
EF1038	-0.41962	0.0204205	-1.34803	5.93876e-27	-0.128185	0.45532	-0.0933019	0.639517	-0.936637	1.9002e-10
EF1038	-0.41962	0.0204205	-1.34803	5.93876e-27	-0.128185	0.45532	-0.0933019	0.639517	-0.936637	1.9002e-10
EF1038	-0.41962	0.0204205	-1.34803	5.93876e-27	-0.128185	0.45532	-0.0933019	0.639517	-0.936637	1.9002e-10
EF1038	-0.41962	0.0204205	-1.34803	5.93876e-27	-0.128185	0.45532	-0.0933019	0.639517	-0.936637	1.9002e-10
EF1038	-0.41962	0.0204205	-1.34803	5.93876e-27	-0.128185	0.45532	-0.0933019	0.639517	-0.936637	1.9002e-10
EF1038	-0.41962	0.0204205	-1.34803	5.93876e-27	-0.128185	0.45532	-0.0933019	0.639517	-0.936637	1.9002e-10
EF1038	-0.41962	0.0204205	-1.34803	5.93876e-27	-0.128185	0.45532	-0.0933019	0.639517	-0.936637	1.9002e-10
EF1038	-0.41962	0.0204205	-1.34803	5.93876e-27	-0.128185	0.45532	-0.0933019	0.639517	-0.936637	1.9002e-10
EF1038	-0.41962	0.0204205	-1.34803	5.93876e-27	-0.128185	0.45532	-0.0933019	0.639517	-0.936637	1.9002e-10
EF1038	-0.41962	0.0204205	-1.34803	5.93876e-27	-0.128185	0.45532	-0.0933019	0.639517	-0.936637	1.9002e-10
EF1038	-0.41962	0.0204205	-1.34803	5.93876e-27	-0.128185	0.45532	-0.0933019	0.639517	-0.936637	1.9002e-10
EF1038	-0.41962	0.0204205	-1.34803	5.93876e-27	-0.128185	0.45532	-0.0933019	0.639517	-0.936637	1.9002e-10
EF1038	-0.41962	0.0204205	-1.34803	5.93876e-27	-0.128185	0.45532	-0.0933019	0.639517	-0.936637	1.9002e-10
EF1038	-0.41962	0.0204205	-1.34803	5.93876e-27	-0.128185	0.45532	-0.0933019	0.639517	-0.936637	1.9002e-10
EF1038	-0.41962	0.0204205	-1.34803	5.93876e-27	-0.128185	0.45532	-0.0933019	0.639517	-0.936637	1.9002e-10
EF1038	-0.41962	0.0204205	-1.34803	5.93876e-27	-0.128185	0.45532	-0.0933019	0.639517	-0.936637	1.9002e-10
EF1038	-0.41962	0.0204205	-1.34803	5.93876e-27	-0.128185	0.45532	-0.0933019	0.639517	-0.936637	1.9002e-10
EF1038	-0.41962	0.0204205	-1.34803	5.93876e-27	-0.128185	0.45532	-0.0933019	0.639517	-0.936637	1.9002e-10
EF1038	-0.41962	0.0204205	-1.34803	5.93876e-27	-0.128185	0.45532	-0.0933019	0.639517	-0.936637	1.9002e-10
EF1038	-0.41962	0.0204205	-1.34803	5.93876e-27	-0.128185	0.45532	-0.0933019	0.639517	-0.936637	1.9002e-10
EF1038	-0.41962	0.0204205	-1.34803	5.93876e-27	-0.128185	0.45532	-0.0933019	0.639517	-0.936637	1.9002e-10
EF1038	-0.41962	0.0204205	-1.34803	5.93876e-27	-0.128185	0.45532	-0.0933019	0.639517	-0.936637	1.9002e-10
EF1038	-0.41962	0.0204205	-1.34803	5.93876e-27	-0.128185	0.45532	-0.0933019	0.639517	-0.936637	1.9002e-10
EF1038	-0.41962	0.0204205	-1.34803	5.93876e-27	-0.128185	0.45532	-0.0933019	0.639517	-0.936637	1.9002e-10
EF1038	-0.41962	0.0204205	-1.34803	5.93876e-27	-0.128185	0.45532	-0.0933019	0.639517	-0.936637	1.9002e-10
EF1038	-0.41962	0.0204205	-1.34803	5.93876e-27	-0.128185	0.45532	-0.0933019	0.639517	-0.936637	1.9002e-10
EF1038	-0.41962	0.0204205	-1.34803	5.93876e-27	-0.128185	0.45532	-0.0933019	0.639517	-0.936637	1.9002e-10
EF1038	-0.41962	0.0204205	-1.34803	5.93876e-27	-0.128185	0.45532	-0.0933019	0.639517	-0.936637	1.9002e-10
EF1038	-0.41962	0.0204205	-1.34803	5.93876e-27	-0.128185	0.45532	-0.0933019	0.639517	-0.936637	1.9002e-10
EF1038	-0.41962	0.0204205	-1.34803	5.93876e-27	-0.128185	0.45532	-0.0933019	0.639517	-0.936637	1.9002e-10
EF1038	-0.41962	0.0204205	-1.34803	5.93876e-27	-0.128185	0.45532	-0.0933019	0.639517	-0.936637	1.9002e-10
EF1038	-0.41962	0.0204205	-1.34803	5.93876e-27	-0.128185	0.45532	-0.0933019	0.639517	-0.936637	1.9002e-10
EF1038	-0.41962	0.0204205	-1.34803	5.93876e-27	-0.128185	0.45532	-0.0933019	0.639517	-0.936637	1.9002e-10
EF1038	-0.41962	0.0204205	-1.34803	5.93876e-27	-0.128185	0.45532	-0.0933019	0.639517	-0.936637	1.9002e-10
EF1038	-0.41962	0.0204205	-1.34803	5.93876e-27	-0.128185	0.45532	-0.0933019	0.639517	-0.936637	1.9002e-10
EF1038	-0.41962	0.0204205	-1.34803	5.93876e-27	-0.128185	0.45532	-0.0933019	0.639517	-0.936637	1.9002e-10
EF1038	-0.41962	0.0204205	-1.34803	5.93876e-27	-0.128185	0.45532	-0.0933019	0.639517	-0.936637	1.9002e-10
EF1038	-0.41962	0.0204205	-1.34803	5.93876e-27	-0.128185	0.45532	-0.0933019	0.639517	-0.936637	1.9002e-10
EF1038	-0.41962	0.0204205	-1.34803	5.93876e-27	-0.128185	0.45532	-0.0933019	0.639517	-0.936637	1.9002e-10
EF1038	-0.41962	0.0204205	-1.34803	5.93876e-27	-0.128185	0.45532	-0.0933019	0.639517	-0.936637	1.9002e-10
EF1038	-0.41962	0.0204205	-1.34803	5.93876e-27	-0.128185	0.45532	-0.0933019	0.639517	-0.936637	1.9002e-10
EF1038	-0.41962	0.0204205	-1.34803	5.93876e-27	-0.128185	0.45532	-0.0933019	0.639517	-0.936637	1.9002e-10
EF1038	-0.41962	0.0204205	-1.34803	5.93876e-27	-0.128185	0.45532	-0.0933019	0.639517	-0.936637	1.9002e-10
EF1038	-0.41962	0.0204205	-1.34803	5.93876e-27	-0.128185	0.45532	-0.0933019	0.639517	-0.936637	1.9002e-10
EF1038	-0.41962	0.0204205	-1.34803	5.93876e-27	-0.128185	0.45532	-0.0933019	0.639517	-0.936637	1.9002e-10
EF1038	-0.41962	0.0204205	-1.34803	5.93876e-27	-0.128185	0.45532	-0.0933019	0.639517	-0.936637	1.9002e-10
EF1038	-0.41962	0.0204205	-1.34803	5.93876e-27	-0.128185	0.45532	-0.0933019	0.639517	-0.936637	1.9002e-10
EF1038	-0.41962	0.0204205	-1.34803	5.93876e-27	-0.128185	0.45532	-0.0933019	0.639517	-0.936637	1.9002e-10
EF1038	-0.41962	0.0204205	-1.34803	5.93876e-27	-0.128185	0.45532	-0.0933019	0.639517	-0.936637	1.9002e-10
EF1038	-0.41962	0.0204205	-1.34803	5.93876e-27	-0.128185	0.45532	-0.0933019	0.639517	-0.936637	1.9002e-10
EF1038	-0.41962	0.0204205	-1.34803	5.93876e-27	-0.128185	0.45532	-0.0933019	0.639517	-0.936637	1.9002e-10
EF1038	-0.41962	0.0204205	-1.34803	5.93876e-27	-0.128185	0.45532	-0.0933019	0.639517	-0.936637	1.9002e-10
EF1038	-0.41962	0.0204205	-1.34803	5.93876e-27	-0.128185	0.45532	-0.0933019	0.639517	-0.936637	1.9002e-10
EF1038	-0.41962	0.0204205	-1.34803	5.93876e-27	-0.128185	0.45532	-0.0933019	0.639517	-0.936637	1.9002e-10
EF1038	-0.41962	0.0204205	-1.34803	5.93876e-27	-0.128185	0.45532	-0.0933019	0.639517	-0.936637	1.9002e-10
EF1038	-0.41962	0.0204205	-1.34803	5.93876e-27	-0.128185	0.45532	-0.0933019	0.639517	-0.936637	1.9002e-10
EF1038	-0.41962	0.0204205	-1.34803	5.93876e-27	-0.128185	0.45532	-0.0933019	0.639517	-0.936637	1.9002e-10
EF1038	-0.41962	0.0204205	-1.34803	5.93876e-27	-0.128185	0.45532	-0.0933019	0.639517	-0.936637	1.9002e-10
[truncated: 13,880 more rows]
