# Supplementary material for: The Role of Fur in the Transcriptional and Iron Homeostatic Response of Enterococcus faecalis
Source: Front Microbiol. 2018 Jul 17;9:1580. doi: 10.3389/fmicb.2018.01580 (PMC6056675; doi:10.3389/fmicb.2018.01580)
Supplement: TABLE S1 — Differentially expressed genes in E. faecalis wild type and Δfur. The table shows the differentially expressed genes obtained from the RNAseq experiments. [file Table_1.XLSX]

## Sheet: Supplementary table 1
GENE ID	Gene annotation	Gene Name	Unique COG	MetaCOG	EC Number	Number	Operon	∆fur vs WT (logFC)	p-value	WT + Fe vs WT(logFC)	p-value	WT + BPD vs WT (logFC)	p-value	∆fur + Fe vs ∆fur (logFC)	p-value	∆fur + BPD vs ∆fur (logFC)	p-value
EF1014	hypothetical protein		X	3			EF1012-EF1016	0.953749	0.0042704	3.43983	1.06503e-38	1.83335	3.68004e-11	2.21475	2.48818e-25	1.40679	7.23754e-11
EF3140	alcohol dehydrogenase, iron-containing		C	3		K08317	EF3134-EF3142	0.463974	0.00281068	3.43243	7.46298e-193	1.28429	1.69202e-21	3.01299	1.64721e-148	1.54185	5.92017e-34
EF1919	acetyltransferase, GNAT family		X	3			EF1919-EF1921	0.773861	0.000180967	3.42419	1.62606e-100	1.92045	1.01323e-25	1.99923	9.36165e-44	1.97668	1.52675e-53
EF1233	ABC transporter, permease protein		G	3		K17320	EF1232-EF1240	0.363281	0.190189	2.99023	5.49469e-49	1.4495	6.69032e-09	1.7951	5.23969e-15	1.22213	5.13e-11
EF1015	hypothetical protein		X	3			EF1012-EF1016	0.0720099	0.878801	2.94019	2.8992e-32	1.0604	7.29009e-05	2.64486	4.29758e-21	1.2067	1.40138e-06
EF3141	D-isomer specific 2-hydroxyacid dehydrogenase family protein		H	3			EF3134-EF3142	0.537145	6.78092e-07	2.60706	4.06485e-239	1.17989	5.06329e-56	1.52431	5.32846e-55	1.32567	7.57635e-47
EF1929	glycerol kinase	glpK	C	3	2.7.1.30	K00864	EF1927-EF1929	-0.191408	0.0714158	1.61963	3.71924e-73	1.15542	3.10584e-54	1.16351	3.09828e-28	1.00964	1.53025e-26
EF0412	PTS system, mannitol-specific IIA component	mltF	G	3	2.7.1.69	K02798	EF0411-EF0413	-0.205177	0.534864	1.22841	1.54373e-05	2.00434	1.38535e-17	3.5947	5.19828e-74	3.30907	1.2772e-53
EF1658	branched-chain alpha-keto acid, E2 component, dihydrolipoamide acetyltransferase	bkdC	C	3	2.3.1.-	K09699	EF1658-EF1663	0.0189358	1	1.18926	1.45094e-05	1.35927	1.23355e-08	1.09313	0.000180946	1.12484	3.94552e-05
EF1358	glycerol dehydrogenase, putative		C	3		K00005	EF1358-EF1361	-0.211739	0.0302468	1.06031	4.00349e-11	-1.18299	5.25628e-46	1.64228	2.19814e-64	-0.995734	1.26727e-46
EF2170	glycosyl transferase, group 2 family protein		M	3			EF2170-EF2172	0.0756019	0.3021	-1.0726	2.76092e-44	-1.06929	3.93018e-60	-1.41875	2.52391e-56	-1.38423	1.39877e-64
EF0764	hypothetical protein		X	5			EF0764	0.369016	0.00150482	-1.4526	4.52928e-20	1.97154	4.87528e-129	-1.24943	3.12261e-21	1.37741	3.58537e-49
EF0750	cell wall surface anchor family protein		X	5			EF0750-EF0754	0.396291	0.000972402	-1.58267	1.76061e-37	-1.28561	2.44739e-32	-2.2609	1.37358e-62	-1.07091	4.22706e-20
EF0751	conserved hypothetical protein		X	5			EF0750-EF0754	0.319267	0.00356711	-1.69367	7.59003e-95	-1.26393	1.49154e-73	-2.04341	1.85471e-60	-1.0327	2.69031e-20
EF0756	hypothetical protein		X	5			EF0756-EF0757	0.425635	0.0323594	-1.71467	4.92132e-15	-1.11756	7.18421e-12	-1.70208	3.55929e-13	-1.31908	2.05294e-11
EF1926	conserved hypothetical protein		X	5			EF1925-EF1926	-0.0983563	0.622034	-1.73136	3.52872e-12	-1.26021	7.08091e-09	-2.59506	1.48188e-22	-1.1472	6.82234e-10
EF0713	conserved hypothetical protein		X	5			EF0713	0.219258	0.420179	0.840203	0.0012012	1.53883	4.88822e-14	1.36312	1.91428e-09	1.43691	9.84902e-15
EF0411	PTS system, mannitol-specfic IIBC components		G	3	2.7.1.69	K02799	EF0411-EF0413	0.0196559	0.973726	0.830213	4.51353e-06	1.70144	3.00321e-33	3.12136	1.30577e-135	3.84862	2.71822e-238
EF1838	PTS system, IIC component		G	3		K20114	EF1836-EF1838	0.02958	0.945526	0.675799	0.0139537	1.44957	8.53926e-10	1.39703	6.32827e-10	1.27525	3.5596e-10
EF0385	major facilitator family transporter		X	5			EF0383-EF0385	-0.188295	0.532694	0.604892	0.033935	1.35905	1.76757e-12	1.29127	6.56607e-10	1.42252	1.07697e-14
EF0859	cation efflux family protein		P	2			EF0859	0.281319	0.0243284	0.180144	0.163049	1.67727	3.70733e-86	1.82414	2.12735e-81	1.26455	3.52751e-38
EF2671	conserved hypothetical protein		S	3		K07816	EF2670-EF2671	-0.0639663	0.413264	-0.599429	1.51521e-14	-1.40902	1.33991e-90	-1.42743	6.5742e-60	-1.52022	2.28926e-71
EF1287	conserved hypothetical protein		X	5			EF1284-EF1292	2.15608	1.13806e-123	-0.795248	1.01762e-10	-1.15422	4.46668e-27	-1.23016	1.03671e-30	-1.62525	2.93706e-61
EF1402	conserved domain protein		X	4		K09888	EF1402-EF1406	0.109628	0.178863	-0.820883	1.23474e-18	-1.04485	5.32768e-47	-1.35017	4.32146e-42	-1.44242	9.5972e-46
EF2075	ABC transporter, permease protein		P	2		K19976	EF2074-EF2076	-1.29935	6.60522e-12	-0.916773	1.62766e-06	2.14966	7.34359e-28	-2.82317	2.01806e-178	3.38314	1.83185e-276
EF2074	ABC transporter, ATP-binding protein		P	2		K19973	EF2074-EF2076	-0.718607	2.15836e-05	-0.98104	1.28387e-09	2.35737	3.42188e-35	-2.7475	4.43608e-262	3.08738	2.59686e-283
EF0693	1-phosphofructokinase	fruK-1	G	3	2.7.1.56	K00882	EF0693-EF0696	1.64806	1.23963e-37	3.77065	1.40869e-253	-0.332847	0.0149715	2.85723	5.65883e-174	-2.02717	1.25467e-57
EF3213	PTS system, IID component		X	5		K02796	EF3210-EF3213	0.407357	1.59362e-06	3.04481	6.97696e-189	0.654047	2.77848e-24	3.75979	0	1.10163	2.30397e-43
EF2222	ABC transporter, permease protein		G	3		K17320	EF2221-EF2223	-0.417796	0.000219727	2.93542	0	0.486645	1.95355e-07	3.87924	0	1.06374	3.53142e-28
EF3139	PTS system, IIC component		X	3		K02795	EF3134-EF3142	-0.669781	0.0898972	2.68399	5.22177e-47	0.601273	0.0087987	4.13633	6.1721e-72	1.27431	9.22968e-05
EF2965	conserved hypothetical protein		G	3		K02822	EF2964-EF2966	-0.492295	0.000251797	2.54608	2.90825e-68	0.614457	1.66874e-09	2.79914	1.42994e-101	1.1143	2.56222e-18
EF2964	putative transport protein, SgaT family		X	3		K03475	EF2964-EF2966	-1.21467	3.31514e-18	2.21021	9.75823e-114	0.22177	0.0175626	3.45629	1.04312e-156	1.00701	1.88911e-18
EF1952	PTS system, IID component		X	4		K19509	EF1950-EF1953	-0.407263	0.0631913	1.93756	1.95457e-27	0.543149	0.00303678	2.55019	5.0131e-49	1.13557	1.74665e-09
EF1828	glycerol uptake facilitator protein, putative		X	5		K02440	EF1827-EF1828	0.686807	0.00764074	1.91839	1.17691e-18	-0.814705	0.00232944	1.98273	2.04742e-25	-1.28004	1.62409e-07
EF3203	ribosomal protein L33	rpmG-4	J	5		K02913	EF3203-EF3206	1.34558	2.42136e-05	1.82365	1.82098e-07	0	0	-1.21398	7.83134e-05	-1.85329	1.21438e-11
EF2647	permease, GntP family		GE	3		K03299	EF2646-EF2647	-0.535044	2.38151e-06	1.72508	6.99644e-78	0.465543	2.50879e-08	1.37145	1.41933e-37	1.19984	6.30178e-33
EF2598	PTS system, beta-glucoside-specific IIABC component		G	3		K02755	EF2597-EF2599	-0.227671	0.166683	1.62495	3.71031e-40	0.714417	3.67425e-09	2.08562	2.6971e-48	1.11938	4.4001e-16
EF0108	C4-dicarboxylate transporter, putative		S	5			EF0108	-3.1324	9.3362e-282	1.06078	2.93905e-30	-0.342862	2.18011e-09	1.21277	1.01967e-33	1.02558	4.21723e-28
EF0383	protein FdrA/conserved hypothetical protein		C	5			EF0383-EF0385	-0.370366	0.160779	1.03386	3.03269e-08	0.920701	5.47961e-09	1.09776	5.72766e-06	1.18588	1.20515e-08
EF2907	ABC transporter, ATP-binding protein		G	3		K10112	EF2903-EF2907	0.214855	0.00517942	-1.17742	6.75861e-43	-0.494417	3.2781e-15	-1.31584	2.91595e-48	-1.00898	4.88755e-37
EF0105	ornithine carbamoyltransferase	argF-1	E	3	2.1.3.3	K00611	EF0104-EF0105	-2.92408	1.36398e-256	0.967862	5.09523e-26	-0.138522	0.098952	1.22775	4.37852e-34	1.44848	1.32284e-60
EF0106	carbamate kinase	arcC-1	E	3	2.7.2.2	K00926	EF0106-EF0107	-3.19046	1.10863e-306	0.945716	4.19683e-26	-0.344406	6.68496e-11	1.37292	2.05906e-33	1.23918	2.50166e-34
EF0384	hypothetical protein		X	5			EF0383-EF0385	-0.646541	0.0191917	0.729601	0.000495342	0.831144	4.34727e-06	1.36701	1.02124e-06	1.44506	3.64254e-09
EF1686	hypothetical protein		X	5			EF1686	1.19846	1.09311e-31	0.488457	2.57109e-06	-0.78249	3.90343e-15	1.99359	1.90822e-108	-1.53499	1.15455e-33
EF3326	conserved hypothetical protein		X	3			EF3317-EF3326	0.859284	1.61319e-06	0.420747	0.0228146	-0.485541	0.014212	1.04905	3.62786e-13	-1.28369	1.00551e-14
EF0413	mannitol-1-phosphate 5-dehydrogenase	mtlD	X	3	1.1.1.17	K00009	EF0411-EF0413	-0.474467	0.0121553	0.26059	0.092859	0.954458	4.67852e-17	2.6135	2.99595e-72	1.32657	4.95917e-16
EF1058	universal stress protein family		T	2			EF1057-EF1058	-1.5869	9.80612e-16	-0.0427341	0.812473	0.296371	0.103689	-3.29205	5.33303e-262	1.97682	4.43818e-124
EF1057	Mn2+/Fe2+ transporter, NRAMP family		P	2		K03322	EF1057-EF1058	-1.38645	3.54485e-12	-0.267424	0.161056	0.467734	0.0139856	-3.35346	5.30365e-166	1.9124	8.69464e-90
EF2076	endocarditis specific antigen		P	2		K19975	EF2074-EF2076	-1.45254	1.17015e-13	-0.277154	0.151285	0.948536	1.11596e-06	-2.9351	2.80715e-158	2.57287	8.57057e-190
EF2475	conserved hypothetical protein		O	4			EF2472-EF2475	0.163557	0.0624213	-0.643423	1.06974e-13	-0.967222	2.56386e-41	-1.00804	5.98717e-20	-1.41405	1.10163e-48
EF1175	glycerol-3-phosphate cytidylyltransferase	gct	M	4	2.7.7.39	K00980	EF1175	0.0427366	0.687806	-0.726333	8.05754e-09	-0.852286	1.38597e-19	-1.30834	7.11058e-19	-1.15705	6.33342e-21
EF1099	collagen adhesin protein		M	4			EF1099	0.565403	3.74582e-05	-0.803796	3.9709e-09	-0.596438	6.0986e-07	-1.22766	4.42461e-21	-1.13098	8.0821e-18
EF2065	conserved hypothetical protein		X	5			EF2065	0.322421	0.0612672	-0.881676	8.79358e-05	-0.852219	2.97644e-06	-1.39468	3.01017e-11	-1.22267	1.57659e-10
EF1920	C4-dicarboxylate anaerobic carrier		C	3		K03326	EF1919-EF1921	0.199745	0.0473688	2.18297	7.08895e-147	1.50515	7.88796e-92	0.736128	4.08379e-15	2.04093	2.33395e-132
EF3202	ribosomal protein S14	rpsN-3	J	1		K02954	EF3202	1.10047	7.51916e-08	1.7654	2.67468e-22	-1.19503	9.79666e-06	-0.420183	0.0188111	-2.04932	7.38725e-23
EF3083	iron compound ABC transporter, ATP-binding protein		P	2		K02013	EF3082-EF3085	9.14499	0	1.57792	0.000511365	10.4427	9.95513e-287	0.0253729	0.793003	1.48362	2.60364e-71
EF0431	TRAP dicarboxylate transporter, DctM subunit		G	3			EF0428-EF0431	0.771185	0.0493678	1.444	9.4452e-05	2.13374	1.29117e-12	0.665516	0.0365814	1.11793	2.0269e-05
EF3085	iron compound ABC transporter, permease protein		P	2		K02015	EF3082-EF3085	8.88818	0	1.27495	0.00134086	10.2007	1.08541e-251	0.231088	0.0387082	1.42955	2.86766e-53
EF3082	iron compound ABC transporter, substrate-binding protein		P	2		K02016	EF3082-EF3085	8.91754	0	1.24203	6.33493e-05	10.1357	2.1708e-261	0.0930225	0.346429	1.3821	3.25879e-61
EF0079	gls24 protein		X	5			EF0076-EF0079	0.119153	0.527311	1.18544	1.8212e-09	1.1306	4.36696e-10	0.434588	0.000179288	1.22496	8.93161e-41
EF0758	cadmium-translocating P-type ATPase		P	2		K01534	EF0758-EF0759	-0.1158	0.493769	1.16786	7.38971e-11	-1.77424	1.79416e-99	0.430454	6.6467e-06	-1.3814	3.5954e-73
EF0078	conserved hypothetical protein		X	5			EF0076-EF0079	-0.0325127	0.75019	1.11366	4.52213e-09	1.01841	3.23207e-10	0.419107	2.65606e-07	1.16008	3.94086e-42
EF0759	sapB protein, putative		S	2		K07507	EF0758-EF0759	-0.195537	0.0474403	1.10445	3.88664e-36	-1.76352	1.29885e-93	0.627309	4.61719e-17	-1.31497	1.35415e-66
EF0647	conserved hypothetical protein		K	1			EF0647	-0.199745	0.112908	-0.997494	2.96689e-14	1.21157	1.06563e-43	-0.432016	0.00300058	1.11979	2.3298e-23
EF1105	hypothetical protein		X	5			EF1105	-0.00301894	1	-1.07301	5.69815e-13	1.28449	1.97126e-48	-0.850016	4.12186e-08	1.03685	3.09076e-22
EF0723	hypothetical protein		X	5			EF0723	-0.0573569	0.799083	0.924864	3.04876e-05	-1.00153	2.77113e-05	0.937281	8.63327e-10	-1.04579	3.66179e-07
EF0443	LysM domain protein		X	5			EF0443	1.19433	3.94603e-29	0.873192	4.78582e-14	-0.998603	3.00257e-17	0.669569	2.28685e-09	-2.18965	1.36839e-57
EF3084	iron compound ABC transporter, permease protein		P	2		K02015	EF3082-EF3085	8.55208	0	0.834038	0.0397497	10.1209	4.21213e-253	-0.125233	0.184464	1.76955	9.53348e-111
EF0099	L-serine dehydratase, iron-sulfur-dependent, alpha subunit	sdhA-1	E	3	4.2.1.13	K01752	EF0097-EF0099	-3.4797	2.02772e-280	0.779194	1.22072e-32	-1.16182	1.17462e-78	0.352139	0.00852567	-3.41415	1.69965e-70
EF1227	conserved hypothetical protein		R	5			EF1225-EF1227	0.165257	0.322616	0.778219	3.62115e-06	-1.03116	8.67764e-37	0.163251	0.0870991	-1.14003	1.06741e-42
EF1096	conserved hypothetical protein		X	5		K09779	EF1096	-0.208105	0.0939201	0.744215	2.94016e-15	1.58342	3.24934e-95	0.545653	0.000287303	1.6641	4.05014e-38
EF0048	conserved hypothetical protein		X	1		K06962	EF0039-EF0049	0.0696695	0.434109	0.658146	3.1495e-14	-1.34183	1.65157e-58	0.953543	7.75012e-27	-1.53448	6.66852e-82
EF1712	orotate phosphoribosyltransferase	pyrE	F	3	2.4.2.10	K00762	EF1712-EF1713	-0.513941	0.00640979	0.64776	0.000302525	-4.03891	9.27052e-94	0.248538	0.0129452	-3.4533	0
EF1713	orotidine 5`-phosphate decarboxylase	pyrF	F	3	4.1.1.23	K01591	EF1712-EF1713	-0.580892	0.00202897	0.635712	0.00107242	-3.99637	7.11306e-93	0.279824	0.00587564	-3.35527	8.46923e-238
EF1226	oxidoreductase, putative		R	5			EF1225-EF1227	0.142068	0.153827	0.6098	8.25183e-10	-1.21198	5.12096e-87	0.0715615	0.332745	-1.41838	1.67273e-77
EF0047	RNA methyltransferase, TrmH family		J	1		K03218	EF0039-EF0049	-0.041951	0.670108	0.596723	1.47182e-11	-1.20038	4.66138e-46	0.69087	7.40091e-21	-1.04888	2.02448e-47
EF1714	dihydroorotate dehydrogenase	pyrD-2	F	3	1.3.3.1	K17828	EF1714-EF1721	-0.631914	0.000872132	0.546995	0.00462266	-4.25481	3.73998e-102	0.296691	0.0045903	-3.59429	2.28162e-265
EF1716	carbamoyl-phosphate synthase, large subunit	pyraB	EF	3	6.3.5.5	K01955	EF1714-EF1721	-0.698178	0.000359013	0.513661	0.0077706	-4.68024	2.67548e-101	0.377156	0.000844851	-4.0065	0
EF1715	dihydroorotate dehydrogenase electron transfer subunit	pyrDII	H	3		K02823	EF1714-EF1721	-0.654489	0.000416271	0.507159	0.00719294	-4.56636	1.56505e-120	0.219927	0.0300643	-3.8731	0
EF1216	hypothetical protein		X	5			EF1216	0.570117	0.0607024	0.50213	0.164669	1.98621	8.8386e-14	0.246038	0.405428	1.13658	3.87179e-08
EF2992	major facilitator family transporter		X	5			EF2992	0.0151594	1	0.475957	0.117886	1.35481	5.45431e-09	0.105866	0.790565	1.29392	1.76983e-06
EF2634	chaperonin, 10 kDa	groES	O	4		K04078	EF2633-EF2634	0.158334	0.1034	0.425832	8.84579e-06	-1.54488	5.15234e-71	-0.557931	3.39929e-13	-1.53034	5.03349e-98
EF2469	transcriptional regulator, Cro/CI family		K	1			EF2469	-0.0412111	0.780711	0.412473	0.0104319	1.02835	3.30423e-17	0.743684	1.61388e-08	1.07079	6.28298e-22
EF1717	carbamoyl-phosphate synthase, small subunit	pyraA	EF	3	6.3.5.5	K01956	EF1714-EF1721	-0.686213	0.000185856	0.412038	0.027755	-4.94103	8.80392e-112	0.182876	0.0847978	-4.31712	0
EF0968	ribosomal protein L21	rplU	X	5		K02888	EF0968-EF0970	-0.118579	0.526965	0.309398	0.100375	-1.61954	2.66888e-16	0.451497	0.000126344	-1.20816	1.27376e-34
EF1182	autoinducer-2 production protein LuxS	luxS	X	5		K07173	EF1182	-0.0748856	0.489375	0.30607	0.00255761	-1.25155	2.399e-38	0.19408	0.0152604	-1.22622	7.18776e-38
EF0714	hypothetical protein		X	5			EF0714	0.703887	4.33242e-05	0.298257	0.13093	2.18008	1.8091e-67	0.0770645	0.655557	1.67684	4.51062e-39
EF1081	conserved hypothetical protein		X	1			EF1080-EF1081	1.33016	3.94031e-15	0.294706	0.139232	-1.037	0.000137966	0.393409	0.0125745	-1.55416	6.23406e-25
EF0630	glyoxalase family protein		E	3			EF0629-EF0630	-0.410519	1.38214e-05	0.291314	0.00111443	-1.3824	3.95284e-61	0.611005	3.51678e-09	-1.01106	7.38697e-21
EF0219	ribosomal protein S14	rpsN-1	J	1		K02954	EF0205-EF0234	0.44399	0.0158724	0.289379	0.101607	-1.40067	1.09587e-17	-0.124067	0.245758	-1.72104	2.04463e-83
EF1168	hypothetical protein		X	3			EF1167-EF1168	0.0281592	0.790118	0.281308	0.00922839	-1.27318	1.05879e-33	0.0511188	0.649527	-1.01251	2.68951e-20
EF1693	KH domain protein		R	5		K06960	EF1693-EF1694	-0.0760747	0.674887	0.280066	0.123312	-1.22839	3.02134e-13	0.51468	5.49531e-06	-1.15883	7.34842e-36
EF1943	drug resistance transporter, Bcr/CflA family protein		X	5			EF1943	0.028417	0.780994	0.277917	0.00307016	1.81168	4.15923e-99	0.224914	0.00341499	1.67835	5.50852e-103
EF1167	fructose-bisphosphate aldolase class-II	fba	G	3	4.1.2.13	K01624	EF1167-EF1168	-0.0289357	0.883649	0.275576	0.156513	-1.26563	8.96464e-11	0.196293	0.0985346	-1.0972	3.19343e-30
EF0234	ribosomal protein L17	rplQ	J	1		K02879	EF0205-EF0234	0.0546621	0.773312	0.260625	0.162015	-1.60065	5.54483e-20	0.179396	0.141557	-1.58671	3.34786e-56
EF1054	ABC transporter, permease protein		P	2		K02050	EF1053-EF1054	0.223802	0.32373	0.248787	0.281922	2.09662	1.88478e-44	0.70334	0.000649159	1.41217	6.40096e-22
EF0969	conserved hypothetical protein		J	5		K07584	EF0968-EF0970	-0.0990161	0.617249	0.238877	0.212915	-1.50844	7.42891e-16	0.34499	0.00189126	-1.20692	4.59444e-42
EF1718	dihydroorotase	pyrC	F	3	3.5.2.3	K01465	EF1714-EF1721	-0.647566	0.00067682	0.225044	0.238826	-5.11461	3.00826e-123	-0.0141967	0.894948	-4.43795	0
EF3022	sodium:dicarboxylate symporter family protein		C	3			EF3022	-0.605067	1.43336e-07	0.21601	0.0190182	-3.05356	2.21325e-188	-0.00321704	0.972679	-2.63767	3.56532e-146
EF0177	basic membrane protein family		R	3		K07335	EF0173-EF0180	0.0586833	0.7592	0.214533	0.242443	-1.53393	1.44757e-18	0.260144	0.0155571	-1.69705	2.03018e-81
EF0298	copper-translocating P-type ATPase		P	2	3.6.3.4	K17686	EF0297-EF0299	-0.121182	0.133272	0.208736	0.00209183	2.49984	8.22737e-51	0.264804	0.00115342	2.81089	1.39438e-250
EF2718	ribosomal protein L1	rplA	X	1		K02863	EF2715-EF2719	0.00348255	0.985142	0.192854	0.301863	-1.48834	1.28923e-13	0.208594	0.0554113	-1.4225	2.03046e-49
EF0403	transcriptional regulator, MarR family		K	1			EF0403-EF0404	0.458952	0.00296519	0.190583	0.276791	1.44268	6.68921e-27	-0.0942303	0.556745	1.19718	4.67091e-23
EF0175	cytidine deaminase	cdd	F	3	3.5.4.5	K01489	EF0173-EF0180	0.0205844	0.874314	0.183532	0.0901854	-1.51043	1.92733e-70	0.201703	0.145113	-1.61526	2.63625e-33
EF0174	deoxyribose-phosphate aldolase	deoC	F	3	4.1.2.4	K01619	EF0173-EF0180	0.0243235	0.8589	0.179896	0.0716876	-1.55493	6.29866e-102	0.214273	0.0803567	-1.6395	4.56287e-37
EF2069	hypothetical protein		X	5			EF2069	0.0545319	0.939097	0.17758	0.683504	1.61438	1.23675e-10	-0.407855	0.288408	1.01604	0.000149739
EF0176	basic membrane protein family		R	3		K07335	EF0173-EF0180	0.31616	0.000725533	0.171124	0.0401891	-1.01138	4.30073e-41	0.182607	0.0250128	-1.52506	1.99106e-79
EF3256	pheromone cAD1 precursor lipoprotein		S	5		K20379	EF3256	0.484644	0.0140131	0.165974	0.384662	-1.01195	8.63966e-08	-0.176229	0.131011	-1.33936	1.38067e-44
EF0195	phosphoglycerate mutase 1	gpm	G	3	5.4.2.1	K01834	EF0195	0.142722	0.446382	0.155832	0.397154	-1.43372	3.55515e-15	0.093564	0.388111	-1.50416	1.80888e-73
EF3053	probable proton-coupled thiamine transporter YuaJ		S	5		K16789	EF3053	0.103504	0.22482	0.152614	0.0698725	1.29299	1.08251e-102	-0.165448	0.0770928	1.09482	7.13178e-36
EF2902	2,3-cyclic-nucleotide 2-phosphodiesterase, putative		F	3		K01119	EF2902	0.369358	0.000211884	0.15212	0.0907264	-1.37584	1.7166e-136	-0.046418	0.542872	-1.51897	4.28187e-78
EF0918	membrane protein, putative		S	5		K08987	EF0918	-0.00344792	0.986372	0.150547	0.45084	-1.10938	1.60916e-07	0.094618	0.712767	-1.01671	9.48216e-07
EF2903	ABC transporter, substrate-binding protein		G	3		K02027	EF2903-EF2907	0.370799	0.0303964	0.147222	0.367592	-1.29393	1.53893e-54	0.106739	0.266518	-1.5396	3.94965e-85
EF2206	cytidine/deoxycytidylate deaminase family protein		FJ	3		K11991	EF2206	0.106662	0.463399	0.143872	0.377613	1.38057	5.94433e-30	-0.165536	0.284242	1.00532	1.4702e-17
EF1694	ribosomal protein S16	rpsP	X	5		K02959	EF1693-EF1694	-0.106205	0.549474	0.142611	0.411698	-1.26697	9.60052e-18	0.337275	0.00120137	-1.15733	3.83872e-34
EF0299	copper transport protein CopZ	copZ	P	2			EF0297-EF0299	-0.306084	0.0201734	0.137848	0.363785	2.19858	7.83396e-142	0.635414	2.24797e-06	2.6331	1.05075e-149
EF1080	ImpB/MucB/SamB family protein		L	1		K03502	EF1080-EF1081	0.98891	1.81814e-20	0.121879	0.221745	-1.72181	6.41268e-60	0.855302	2.21368e-19	-1.81315	4.90209e-53
EF2395	ribosome recycling factor	frr	X	1		K02838	EF2395-EF2400	-0.0135311	0.94141	0.121133	0.50338	-2.51517	1.15509e-47	0.0109146	0.913264	-2.47746	4.0612e-193
EF0007	ribosomal protein S6	rpsF	J	1		K02990	EF0007-EF0009	-0.204173	0.335318	0.116747	0.539421	-1.58106	8.54302e-18	0.187534	0.192049	-1.39252	8.10795e-22
EF0218	ribosomal protein L5	rplE	J	1		K02931	EF0205-EF0234	0.374466	0.0436117	0.110402	0.539431	-1.46544	1.8756e-14	-0.246511	0.0282619	-1.63003	1.45574e-79
EF2715	ribosomal protein L7/L12	rplL	J	1		K02935	EF2715-EF2719	-0.0547162	0.772952	0.108617	0.560831	-1.46959	1.38113e-13	0.156659	0.202403	-1.33829	3.99948e-39
EF1067	hypothetical protein		X	5			EF1067	-0.0444398	0.760286	0.106455	0.480024	1.06398	8.68374e-16	0.049511	0.706429	1.33402	1.13455e-34
EF0232	ribosomal protein S11	rpsK	J	1		K02948	EF0205-EF0234	0.0865337	0.637971	0.106218	0.555427	-1.73764	3.31869e-19	-0.157307	0.146791	-1.65142	8.46178e-88
EF0811	hypothetical protein		X	5			EF0810-EF0811	-0.16791	0.309519	0.096235	0.625722	1.02942	2.7827e-11	0.258186	0.0946436	1.16449	2.37359e-23
EF0635	amino acid permease family protein		E	3		K20265	EF0635	0.343893	0.0435317	0.0960602	0.292175	-1.78122	2.44468e-89	0.805748	3.68537e-14	-2.53436	1.35032e-192
EF0200	translation elongation factor G	fusA	J	1		K02355	EF0198-EF0201	0.23508	0.246784	0.0948575	0.642256	-1.12632	2.18011e-08	-0.303972	0.0155978	-1.24733	7.25652e-41
EF0199	ribosomal protein S7	rpsG	J	1		K02992	EF0198-EF0201	0.265905	0.164485	0.0918894	0.626328	-1.02766	3.27306e-08	-0.258992	0.0198139	-1.10998	2.03342e-38
EF1719	aspartate carbamoyltransferase	pyrB	F	3	2.1.3.2	K00609	EF1714-EF1721	-0.68345	0.000486265	0.0858886	0.646808	-5.17327	4.02656e-114	-0.100205	0.41341	-4.46136	2.25732e-99
EF3070	ribosomal protein S4	rpsD	J	1		K02986	EF3070	0.0564408	0.763973	0.0777653	0.681903	-1.1659	2.49537e-10	0.276543	0.0156304	-1.23888	1.43517e-39
EF2728	lipoprotein, putative		R	5			EF2728	0.152675	0.0879822	0.075037	0.357614	-1.24937	2.00642e-84	-0.0850601	0.389072	-1.17909	5.04022e-35
EF3233	Dps family protein		P	2		K04047	EF3233	0.13726	0.474319	0.067288	0.72478	-1.21479	1.21242e-10	0.0866899	0.433469	-1.15083	1.93481e-43
EF2397	translation elongation factor Ts	tsf	X	1		K02357	EF2395-EF2400	0.060836	0.745459	0.0671123	0.720202	-1.48488	1.11852e-15	-0.155915	0.159314	-1.45989	2.22289e-64
EF0198	ribosomal protein S12	rpsL	X	1		K02950	EF0198-EF0201	0.24886	0.199342	0.0625293	0.746023	-1.02297	5.71311e-08	-0.260483	0.0181227	-1.06871	3.7559e-35
EF2716	ribosomal protein L10	rplJ	J	1		K02864	EF2715-EF2719	-0.0317725	0.870787	0.059074	0.759451	-1.49156	1.4605e-14	-0.06565	0.544208	-1.21376	7.52037e-50
EF0216	ribosomal protein L14	rplN	X	1		K02874	EF0205-EF0234	0.269424	0.166346	0.0580351	0.756788	-1.71419	4.59543e-20	-0.209759	0.0863586	-1.67795	2.56011e-66
EF2719	ribosomal protein L11	rplK	X	1		K02867	EF2715-EF2719	-0.0734712	0.697705	0.0572467	0.760063	-1.70339	7.35781e-21	-0.0766064	0.451353	-1.3982	8.24992e-72
EF0009	ribosomal protein S18	rpsR	X	1		K02963	EF0007-EF0009	-0.187825	0.376139	0.0498246	0.800115	-1.61003	4.39212e-18	0.13653	0.322333	-1.38253	1.78337e-22
EF0233	DNA-directed RNA polymerase, alpha subunit	rpoA	K	1	2.7.7.6	K03040	EF0205-EF0234	0.066637	0.730876	0.0495202	0.793615	-1.63827	4.18749e-18	-0.230406	0.0379656	-1.55462	5.28572e-69
EF1685	hemolysin III	hlyIII	R	5		K11068	EF1685	0.0128383	0.873873	0.0476857	0.563136	2.04984	2.27831e-255	0.5099	4.90481e-09	1.9714	4.14592e-151
EF0173	pyrimidine-nucleoside phosphorylase	pyn	F	3	2.4.2.2	K00756	EF0173-EF0180	0.17228	0.0933871	0.0437711	0.628202	-1.14977	1.07858e-41	0.0293708	0.715385	-1.31905	1.24222e-62
EF0008	single-strand binding protein	ssb-1	L	1		K03111	EF0007-EF0009	-0.24388	0.253519	0.0337751	0.859446	-1.57391	2.61088e-16	0.119439	0.391636	-1.29051	1.9944e-22
EF0217	ribosomal protein L24	rplX	J	1		K02895	EF0205-EF0234	0.297631	0.120383	0.033605	0.853874	-1.62352	1.11199e-16	-0.339343	0.00348526	-1.654	1.59651e-66
EF2494	phosphatidate cytidylyltransferase	cdsA	I	3	2.7.7.41	K00981	EF2494-EF2495	-0.0948619	0.330108	0.0263783	0.827736	1.2132	9.67059e-55	0.904401	6.54693e-24	1.00628	4.01809e-18
EF0228	adenylate kinase	adk	F	1	2.7.4.3	K00939	EF0205-EF0234	0.105075	0.570581	0.0225878	0.900968	-2.15642	9.0498e-28	-0.228405	0.0482744	-2.00305	4.57479e-120
EF0220	ribosomal protein S8	rpsH	X	1		K02994	EF0205-EF0234	0.431328	0.0183949	0.0207137	0.907992	-1.01801	8.89498e-08	-0.400076	0.000153386	-1.39591	1.66212e-65
EF0387	sodium/dicarboxylate symporter family protein		C	3			EF0386-EF0387	0.133065	0.478456	0.0111535	0.973974	1.79562	1.2946e-52	-0.119999	0.532248	1.24152	5.41723e-16
EF0634	decarboxylase, putative		E	3			EF0634	0.524015	0.00487223	0.01001	0.954786	-1.70423	7.1122e-24	0.532428	2.06258e-07	-2.5613	3.6519e-224
EF0221	ribosomal protein L6	rplF	J	1		K02933	EF0205-EF0234	0.251035	0.18846	0.00764372	0.967545	-1.34729	6.72243e-13	-0.140242	0.203901	-1.46916	1.17714e-63
EF2930	conserved hypothetical protein		S	5			EF2929-EF2930	0.0788498	0.552915	0.00285964	0.979386	2.00567	8.14751e-120	0.0385385	0.782091	1.69697	1.35737e-58
EF0853	hypothetical protein		X	5			EF0851-EF0853	0	0	0	0	1.67149	6.84215e-07	0	0	1.36886	9.27287e-05
EF1098	conserved hypothetical protein		X	5			EF1098	0	0	0	0	1.69614	3.52596e-09	0	0	1.37083	1.1294e-06
EF2447	DNA internalization-related competence protein ComEC/Rec2		R	1		K02238	EF2446-EF2449	-0.0556721	0.782399	-0.000567092	1	1.41896	5.42721e-26	0.535781	0.00239463	1.03275	4.58957e-11
EF0205	ribosomal protein S10	rpsJ	J	1		K02946	EF0205-EF0234	-0.0754868	0.691123	-0.00326341	0.986289	-1.85342	9.43693e-23	-0.0569546	0.595314	-1.45869	4.38741e-69
EF3230	ribosomal protein S9	rpsI	X	5		K02996	EF3230	0.11114	0.568068	-0.00338561	0.985873	-1.27192	9.23195e-12	0.15063	0.16898	-1.41878	2.1944e-61
EF0213	ribosomal protein L16	rplP	J	1		K02878	EF0205-EF0234	0.209263	0.298096	-0.00431999	0.982059	-1.79518	1.30383e-20	-0.351001	0.00411882	-1.66131	1.57921e-58
EF2396	uridylate kinase	pyrH	F	1	2.7.4.-	K09903	EF2395-EF2400	-0.0422723	0.824204	-0.00762643	0.967211	-2.53662	3.29678e-44	-0.249913	0.0175537	-2.29316	1.2226e-144
EF0178	ABC transporter, ATP-binding protein		R	3		K02056	EF0173-EF0180	0.0399629	0.726499	-0.00839944	0.925154	-1.26129	2.40162e-51	0.15668	0.0935349	-1.30225	7.63863e-65
EF1225	thiamin biosynthesis ApbE, putative		X	5		K03734	EF1225-EF1227	0.219896	0.0234361	-0.0168056	0.855035	-1.18873	4.7511e-105	-0.421295	4.6595e-09	-1.54543	2.37145e-99
EF0209	ribosomal protein L2	rplB	J	1		K02886	EF0205-EF0234	0.159203	0.422084	-0.0186106	0.923567	-1.79335	3.47621e-20	-0.426261	0.000218484	-1.64099	2.27775e-70
EF0224	ribosomal protein S5	rpsE	J	1		K02988	EF0205-EF0234	0.0758435	0.688308	-0.0254587	0.89271	-1.58892	4.84416e-17	-0.0779004	0.495349	-1.49585	3.09888e-70
EF1047	conserved hypothetical protein		R	1		K07040	EF1047-EF1048	0.0801344	0.64341	-0.0258697	0.876943	1.26131	4.59918e-12	0.0647888	0.493159	1.09202	2.25704e-45
EF0223	ribosomal protein L18	rplR	J	1		K02881	EF0205-EF0234	0.0813489	0.661556	-0.030976	0.865213	-1.59495	3.77365e-18	-0.177339	0.120969	-1.52474	7.89771e-67
EF1283	transcriptional regulator, RinA family		X	1			EF1278-EF1283	2.42994	1.64106e-85	-0.0378038	0.81528	-1.22236	7.98922e-20	0.345362	0.000867623	-2.20431	7.92517e-78
EF0652	hypothetical protein		X	5			EF0652	0.0447347	0.889623	-0.0388911	0.851133	0.999959	1.51164e-07	0.12374	0.582921	1.19865	4.16554e-14
EF0231	ribosomal protein S13	rpsM	J	1		K02952	EF0205-EF0234	0.0923155	0.617324	-0.0394218	0.828254	-1.80122	4.49702e-20	-0.268608	0.0106918	-1.69775	6.82489e-98
EF0215	ribosomal protein S17	rpsQ	J	1		K02961	EF0205-EF0234	0.21229	0.269862	-0.0403521	0.828176	-1.72375	5.06263e-21	-0.444877	0.000129649	-1.61429	2.21771e-62
EF0214	ribosomal protein L29	rpmC	X	1		K02904	EF0205-EF0234	0.193815	0.31481	-0.0481127	0.790875	-1.80855	5.49893e-20	-0.354304	0.00256913	-1.58807	1.70296e-54
EF1612	pyruvate formate-lyase activating enzyme	pflA	O	3	1.97.1.4	K04069	EF1610-EF1613	0.11447	0.528029	-0.0573423	0.74288	-2.14735	5.80075e-37	-0.424149	1.84937e-05	-2.41374	4.47305e-183
EF0721	ATP-dependent DNA helicase PcrA	pcrA	L	1	3.6.1.-	K03657	EF0721-EF0722	-0.0764525	0.651896	-0.0608708	0.708793	-1.14316	3.5552e-44	-0.408645	5.46959e-06	-1.007	8.16195e-38
EF0229	translation initiation factor IF-1	infA	J	1		K02518	EF0205-EF0234	0.133463	0.46284	-0.0619346	0.74793	-1.81325	1.0509e-21	-0.331012	0.00126558	-1.69924	2.51237e-103
EF0212	ribosomal protein S3	rpsC	J	1		K02982	EF0205-EF0234	0.186788	0.354442	-0.0643095	0.742272	-1.70991	1.66574e-18	-0.462219	0.00012145	-1.5733	9.54571e-56
EF1610	conserved domain protein		X	3			EF1610-EF1613	0.0525971	0.601623	-0.0653657	0.490823	-1.09805	2.15925e-67	0.0379485	0.614268	-1.15313	1.03054e-54
EF1282	hypothetical protein		X	1			EF1278-EF1283	2.42573	5.54646e-83	-0.0666304	0.673582	-1.17487	3.35716e-14	0.30946	0.00677082	-2.22649	4.91374e-75
EF0226	ribosomal protein L15	rplO	J	1		K02876	EF0205-EF0234	0.0431425	0.819077	-0.0668063	0.727973	-1.50494	7.1108e-16	-0.255335	0.0173932	-1.47257	1.14981e-61
EF1061	N-acyl-D-amino-acid deacylase family protein		FR	3			EF1060-EF1062	-0.0839436	0.705121	-0.0669012	0.788057	1.04937	1.82871e-12	-0.507944	0.0250399	1.02248	2.44919e-09
EF0207	ribosomal protein L4	rplD	X	1		K02926	EF0205-EF0234	0.0449995	0.815697	-0.0786091	0.678521	-1.79307	5.88128e-21	-0.280981	0.0108972	-1.5566	2.38352e-73
EF0230	ribosomal protein L36	rpmJ	J	1		K02919	EF0205-EF0234	0.0830067	0.660011	-0.0881155	0.641405	-1.75869	1.17049e-22	-0.380061	0.000156315	-1.63214	7.2735e-97
EF0210	ribosomal protein S19	rpsS	J	1		K02965	EF0205-EF0234	0.207475	0.289118	-0.0888692	0.638092	-1.79532	2.08656e-21	-0.559917	2.28697e-06	-1.66579	1.11421e-59
EF0024	conserved hypothetical protein		X	5			EF0020-EF0024	0.210954	0.00988319	-0.0916953	0.24794	-1.89009	1.25838e-126	0.447069	1.35845e-07	-2.07302	1.29712e-113
EF2398	ribosomal protein S2	rpsB	X	1		K02967	EF2395-EF2400	0.330208	0.0794441	-0.0941986	0.611267	-1.49503	1.22194e-15	-0.321782	0.00301476	-1.60591	7.47798e-81
EF0227	preprotein translocase, SecY subunit	secY	U	1		K03076	EF0205-EF0234	0.0371942	0.8507	-0.121048	0.531453	-1.49516	1.27777e-14	-0.157206	0.158112	-1.44328	1.13547e-60
EF0208	ribosomal protein L23	rplW	J	1		K02892	EF0205-EF0234	0.0776978	0.683902	-0.121475	0.515281	-1.8393	8.90251e-23	-0.525374	2.20154e-06	-1.55013	2.38922e-67
EF1611	inorganic pyrophosphatase, manganese-dependent	ppaC	C	3	3.6.1.1	K15986	EF1610-EF1613	0.107243	0.531527	-0.123656	0.45013	-1.26269	5.66427e-50	-0.152709	0.111167	-1.44432	2.40958e-77
EF0396	conserved hypothetical protein		R	5			EF0396-EF0397	-0.18021	0.0629553	-0.124852	0.163878	1.02067	9.6475e-13	0.129799	0.0867301	1.17364	1.57242e-58
EF0211	ribosomal protein L22	rplV	X	1		K02890	EF0205-EF0234	0.188438	0.348788	-0.125156	0.517351	-1.68854	2.19496e-18	-0.53589	1.17913e-05	-1.57604	1.81552e-52
EF1110	YkgG family protein		S	3		K00782	EF1107-EF1110	-0.180825	0.059582	-0.125269	0.15746	-2.71188	1.19536e-202	-0.0341439	0.633769	-2.53984	1.21685e-261
EF2583	conserved hypothetical protein		S	5			EF2583	-0.0843213	0.361319	-0.125802	0.167646	1.40476	1.41159e-100	-0.0380434	0.690418	1.43603	3.9286e-69
EF1613	formate acetyltransferase	pflB	C	3	2.3.1.54	K00656	EF1610-EF1613	0.260343	0.196523	-0.127518	0.511252	-2.3307	9.92934e-32	-0.58097	8.17612e-07	-2.49782	9.27817e-142
EF0206	ribosomal protein L3	rplC	X	1		K02906	EF0205-EF0234	-0.0173381	0.929216	-0.129893	0.502517	-1.8591	1.57685e-21	-0.321336	0.00365436	-1.47769	2.65522e-64
EF1109	iron-sulfur cluster binding protein		C	3		K18929	EF1107-EF1110	-0.185302	0.289315	-0.144478	0.397515	-3.03017	4.01906e-276	-0.0672761	0.469212	-2.71893	8.13981e-271
EF0285	dihydroorotate dehydrogenase	pyrD-1	F	3	1.3.3.1	K00226	EF0285	-0.169528	0.0925488	-0.144789	0.103717	1.16713	3.17021e-13	0.0211976	0.782998	1.41786	2.30317e-69
EF1280	DNA replication protein, putative		L	1		K02315	EF1278-EF1283	2.54793	3.4431e-152	-0.148339	0.197425	-1.1462	4.98861e-27	0.157613	0.0826869	-1.9626	4.33586e-82
EF2721	L-serine dehydratase, iron-sulfur-dependent, beta subunit	sdhB-2	E	3	4.2.1.13	K01752	EF2721-EF2722	0.030232	0.816562	-0.150652	0.196628	-1.31508	3.54652e-29	-0.857169	1.34626e-12	-1.19489	1.372e-24
EF3052	hypothetical protein		X	5			EF3052	0.464039	5.62593e-06	-0.152103	0.210634	1.76256	3.69897e-109	0.376063	0.00242388	1.03428	5.79581e-38
EF1281	hypothetical protein		X	1			EF1278-EF1283	2.65736	6.09726e-36	-0.160454	0.726971	-1.05165	0.00252706	0.0216593	0.938074	-2.18556	7.27756e-33
EF2796	hypothetical protein		X	5			EF2796	0.109054	0.345352	-0.16439	0.194832	1.83096	2.01432e-101	0.071544	0.521205	1.309	6.77632e-48
EF2929	membrane protein, putative		X	5			EF2929-EF2930	0.30757	0.00164436	-0.165402	0.054862	2.09232	2.0056e-109	-0.325227	0.00125488	1.61205	1.62349e-70
EF0225	ribosomal protein L30	rpmD	J	1		K02907	EF0205-EF0234	0.0659837	0.73081	-0.180189	0.336984	-1.50681	1.20108e-16	-0.275167	0.00720449	-1.41103	1.40211e-72
EF1108	oxidoreductase, putative		C	3		K18928	EF1107-EF1110	-0.196949	0.0525638	-0.180998	0.049262	-3.11096	6.1487e-214	-0.267841	0.000897022	-2.69642	2.87101e-275
EF1720	uracil permease		F	3		K02824	EF1714-EF1721	-0.769616	0.000889131	-0.191739	0.353197	-5.22247	7.39891e-113	-0.112077	0.443778	-4.39901	4.91927e-194
EF0101	hydrolase, alpha/beta hydrolase fold family		I	3			EF0101	-0.218947	0.00843246	-0.192458	0.0175258	1.13348	4.33078e-69	0.318006	0.000460869	1.19288	2.30443e-51
EF0094	formate/nitrite transporter family protein		P	2		K21993	EF0094	-0.203767	0.00809077	-0.196707	0.0284038	-1.2129	4.94693e-74	-0.0175956	0.849348	-1.16851	1.3704e-43
EF1060	pheromone binding protein		E	3		K15580	EF1060-EF1062	-0.283394	0.257051	-0.197789	0.508282	1.19328	1.69947e-11	0.110264	0.723306	1.05509	7.41457e-10
EF0283	3-oxoacyl-(acyl-carrier-protein) synthase II	fabF-1	IQ	3	2.3.1.41	K09458	EF0283-EF0284	-0.511123	0.00765379	-0.198288	0.300565	1.06988	2.69338e-08	-0.460635	2.0085e-05	1.72257	9.17262e-81
EF0031	membrane protein, putative		S	5		K14205	EF0031	-0.296146	0.00636674	-0.215467	0.0222237	1.24905	3.14911e-51	0.232166	0.00823734	1.5172	4.12433e-72
EF3015	sodium:dicarboxylate symporter family protein		E	3		K07862	EF3015	-0.508738	6.08631e-09	-0.230473	0.0137646	1.25885	3.09715e-60	0.414341	6.54195e-06	1.67555	8.09216e-68
EF1775	hypothetical protein		S	5			EF1775-EF1776	-0.252432	0.0110474	-0.239085	0.0164954	1.33226	1.20452e-65	0.235971	0.0109147	1.56134	7.99545e-70
EF2862	conserved hypothetical protein		S	5			EF2862	-0.103703	0.469501	-0.245492	0.1447	1.66273	8.79857e-66	-0.124074	0.431537	1.59984	7.77856e-49
EF0036	conserved hypothetical protein		K	1			EF0036	-0.0596052	0.593261	-0.253899	0.0306158	1.18152	1.15598e-51	-0.0927982	0.467503	1.08604	1.38927e-30
EF0014	adenylosuccinate synthetase	purA	X	5	6.3.4.4	K01939	EF0014	0.403652	0.0233064	-0.271642	0.00439698	-1.65888	2.77326e-68	-0.475317	1.52888e-06	-1.96666	7.80993e-127
EF1029	conserved hypothetical protein		X	5			EF1029-EF1031	0.122188	0.410887	-0.276744	0.0752402	-1.45177	3.76125e-23	0.271494	0.066989	-1.6093	2.96413e-23
EF0954	sugar-binding transcriptional regulator, LacI family		K	1		K02529	EF0954	-0.0319795	0.720737	-0.286822	0.000295986	1.10689	3.25597e-67	-0.133957	0.157877	1.05436	2.12094e-33
EF1292	holin, putative		X	5			EF1284-EF1292	2.24262	1.01293e-161	-0.289159	0.0141259	-1.06306	6.95365e-30	-0.568094	1.91065e-10	-1.75884	4.66896e-83
EF3047	conserved hypothetical protein		X	5			EF3047	0.480579	0.0169113	-0.293408	0.218839	1.86787	6.60806e-32	-0.47159	0.030421	1.04006	3.09772e-08
EF3014	cation-transporting ATPase, E1-E2 family		P	2			EF3014	0.0465177	0.706829	-0.294972	0.017288	1.27496	1.17657e-48	-0.0257132	0.84653	1.14505	1.35475e-28
EF1071	galactose-1-phosphate uridylyltransferase	galT	G	3	2.7.7.10	K00965	EF1069-EF1072	0.212884	0.0779693	-0.297858	0.0116387	1.69821	9.42964e-88	-0.176223	0.110268	1.38099	2.24079e-44
EF1147	CTP synthase	pyrG	F	1	6.3.4.2	K01937	EF1146-EF1147	-0.281798	0.0979829	-0.30987	0.0628142	-1.4523	4.06071e-73	-0.376407	9.05175e-06	-1.14189	2.50287e-51
EF2474	ribosomal-protein-alanine acetyltransferase, putative		R	4		K03789	EF2472-EF2475	0.0496262	0.554364	-0.313401	0.000521245	-1.04134	1.46628e-51	-0.385721	1.4118e-05	-1.32499	1.43154e-42
EF0636	Na+/H+ antiporter	nhaC-2	C	3		K03315	EF0636	0.459737	3.68058e-07	-0.316094	0.000393922	-1.87945	6.36804e-138	0.775316	2.29148e-18	-2.66849	2.67845e-157
EF2068	multidrug resistance protein, putative		X	5		K08161	EF2067-EF2068	-0.0176143	0.909197	-0.321622	0.0218304	1.10354	6.76256e-30	-0.0638523	0.63003	1.00769	1.277e-25
EF3110	peptide ABC transporter, ATP-binding protein		EP	3		K02031	EF3110	-0.491544	3.4731e-06	-0.331777	0.000347299	1.17444	3.89553e-12	-0.434695	6.25768e-08	1.48636	7.32219e-58
EF1279	DNA replication protein, putative		L	1			EF1278-EF1283	2.54355	3.68111e-132	-0.346004	0.0705376	-1.04917	1.13201e-13	0.000524642	1	-1.80873	3.56006e-66
EF0003	conserved hypothetical protein		S	1			EF0003-EF0006	0.0650958	0.517436	-0.348027	0.00168304	-1.19868	4.60331e-39	0.105859	0.228249	-1.26145	2.96049e-44
EF2729	transcription antitermination protein NusG	nusG	K	1		K02601	EF2729-EF2731	-0.0451085	0.645586	-0.352123	7.18612e-05	-1.18278	1.32585e-42	-0.15906	0.0766219	-1.25174	7.82679e-39
EF0168	pantothenate kinase, putative		H	4		K00867	EF0168	0.16013	0.047778	-0.378709	4.47779e-07	1.64763	2.29794e-81	-0.225536	0.00810447	1.19956	4.52081e-53
EF0172	sugar-binding transcriptional regulator, LacI family		K	1		K02529	EF0172	-0.209964	0.0153518	-0.39191	1.38912e-06	-1.70059	1.25329e-132	-0.281862	0.00167356	-1.4916	8.75097e-63
EF1131	L-ribulose-5-phosphate 4-epimerase	araD	G	3	5.1.3.4	K03077	EF1125-EF1131	0.169672	0.488824	-0.407339	0.233891	1.55398	5.88209e-17	-0.115108	0.692751	1.22418	1.38277e-11
EF0993	UDP-N-acetylmuramoylalanine--D-glutamate ligase	murD	M	4	6.3.2.9	K01925	EF0988-EF1002	0.198962	0.0479441	-0.432056	1.13565e-11	-1.29575	7.41252e-116	-0.649609	5.91124e-16	-1.5557	1.87174e-83
EF1072	galactose operon repressor galR	galR	K	3		K02529	EF1069-EF1072	0.0127657	0.897204	-0.450467	1.71634e-05	1.81049	6.82841e-137	0.14575	0.137762	1.60649	3.63532e-85
EF0297	transcriptional repressor CopY	copY	K	2			EF0297-EF0299	0.217111	0.113589	-0.468602	0.00966473	2.60839	5.1754e-159	-0.558996	0.000159815	2.68926	6.69831e-149
EF0854	signal peptidase I		U	4		K03100	EF0854	-0.146211	0.63657	-0.479538	0.0834862	1.47035	9.54796e-18	-0.0953524	0.745371	1.43941	7.23147e-12
EF2605	UDP-N-acetylglucosamine 1-carboxyvinyltransferase 1	murAA	M	4	2.5.1.7	K00790	EF2605-EF2606	-0.201675	0.0872676	-0.482028	1.93299e-06	-1.07738	3.89919e-31	-0.455187	9.07313e-07	-1.09183	4.09272e-32
EF0933	conserved hypothetical protein		R	5		K03657	EF0933	0.182787	0.0570885	-0.501122	1.4062e-07	1.97826	1.12813e-75	-0.508243	5.38622e-09	1.51494	2.41149e-75
EF2627	teichoic acid glycosylation protein, putative		S	5			EF2627	-0.277357	0.108285	-0.517947	0.0123722	-1.43497	1.41395e-18	-0.966081	9.70265e-06	-1.54536	4.81515e-15
EF1286	conserved hypothetical protein		X	5			EF1284-EF1292	2.32081	1.19783e-91	-0.525312	2.02553e-11	-1.3039	8.89657e-79	-0.449957	4.59876e-06	-1.83545	1.6014e-82
EF2556	fumarate reductase flavoprotein subunit precursor, putative		C	3		K00244	EF2556	0.182302	0.313118	-0.536057	0.00476523	-1.09883	3.78287e-09	-0.420105	6.35271e-05	-1.2198	3.19156e-52
EF3079	acetyltransferase, GNAT family		J	1		K03790	EF3079	-0.650628	1.37087e-10	-0.573188	1.29546e-07	1.10444	2.26188e-56	-0.154666	0.141183	1.45191	2.30107e-57
EF1664	conserved hypothetical protein		S	5			EF1664	0.161675	0.242497	-0.57986	8.72306e-05	1.97156	6.99378e-115	-0.097827	0.560706	1.50661	1.24626e-45
EF0103	transcriptional regulator, ArgR family		K	1		K03402	EF0103	0.128847	0.403082	-0.580376	0.000570151	1.76618	2.69916e-67	-0.983522	6.84665e-08	1.11181	3.65283e-21
EF0293	phosphosugar-binding transcriptional regulator, putative		K	1			EF0293	0.145978	0.269832	-0.630585	1.49555e-05	1.21096	8.1278e-41	-0.623628	9.31932e-05	1.05502	9.85064e-23
EF1215	hypothetical protein		X	5			EF1215	-0.140505	0.165486	-0.631554	3.14211e-09	1.75916	9.93344e-111	-0.412833	1.06605e-05	1.56347	2.59326e-90
EF1800	conserved hypothetical protein		X	5		K17624	EF1800	-0.143272	0.342214	-0.632547	7.1851e-05	1.2419	6.38561e-27	-0.18209	0.24865	1.16514	1.88263e-20
EF1285	major tail protein		X	5			EF1284-EF1292	2.24334	1.71624e-85	-0.647597	1.99436e-15	-1.30015	8.01495e-87	-0.681062	3.77481e-10	-1.89389	3.93253e-81
EF1055	tunicamycin resistance protein, putative		X	5			EF1055	-0.216542	0.330542	-0.647727	0.00983696	1.21204	3.30972e-13	0.358264	0.0721613	1.29597	1.20351e-18
EF1291	hypothetical protein		X	5			EF1284-EF1292	2.12277	1.97031e-99	-0.647907	8.07099e-20	-1.19413	8.57831e-92	-0.731292	8.9547e-17	-1.7226	7.84342e-92
EF2738	thioredoxin reductase/glutathione-related protein		O	4		K00384	EF2738-EF2739	-0.247564	0.198088	-0.651933	0.000579686	-3.20756	6.99859e-58	-0.409663	0.000130937	-2.52046	7.96156e-190
EF1544	conserved hypothetical protein		S	5			EF1544-EF1546	0.257772	0.0322336	-0.659582	2.94411e-08	1.5064	6.39329e-113	-0.818524	1.23947e-08	1.03884	2.09382e-20
EF0372	DNA-binding response regulator		TK	2			EF0372-EF0373	-0.404487	0.000211301	-0.662677	3.73933e-09	1.20378	9.27574e-58	-0.116464	0.357974	1.39343	2.73141e-48
EF1940	cyclic AMP receptor protein, putative		T	2			EF1940	-0.229245	0.103163	-0.669386	7.96888e-05	1.16964	4.85588e-35	-0.473657	0.00273714	0.995638	1.00151e-15
EF1290	structural protein, putative		X	5			EF1284-EF1292	2.14603	3.542e-81	-0.68349	2.64648e-14	-1.20675	4.19028e-48	-0.937989	4.42695e-32	-1.69221	5.96206e-76
EF3097	ribonuclease III	rnc	K	4	3.1.26.3	K03685	EF3094-EF3097	0.190313	0.0121441	-0.690824	7.085e-20	-1.061	5.30728e-44	-0.856101	6.89733e-21	-1.50141	1.97162e-69
EF1399	molybdenum ABC transporter, ATP-binding protein, putative		P	2		K02017	EF1386-EF1399	-0.17134	0.21457	-0.692962	5.32233e-06	1.34352	1.65771e-46	0.0956321	0.530467	1.43786	2.59921e-31
EF1776	conserved domain protein		X	5			EF1775-EF1776	-0.465935	0.00365836	-0.695951	0.000104424	1.21358	7.18086e-23	-0.00842507	0.952559	1.68669	2.71862e-51
EF1284	structural protein, putative		X	5			EF1284-EF1292	2.2916	2.24333e-69	-0.705716	2.36231e-13	-1.24316	1.55367e-75	-0.713686	3.93718e-09	-1.86135	2.81028e-64
EF2739	alkyl hydroperoxide reductase, C subunit	ahpC	O	4	1.6.4.-	K03386	EF2738-EF2739	-0.0294482	0.872597	-0.707125	0.000357792	-2.99362	9.45487e-50	-0.475767	4.79625e-06	-2.61064	2.24332e-213
EF2920	ABC transporter, ATP-binding/permease protein		V	4		K18887	EF2919-EF2920	-0.347439	0.000511439	-0.71567	5.22192e-14	1.00748	7.14882e-33	-0.423811	2.29581e-08	1.23461	1.29941e-71
EF1822	response regulator		KT	1		K07707	EF1822	-0.070531	0.496632	-0.727998	2.72209e-06	2.09184	1.25795e-198	-0.743641	5.89333e-09	1.78167	2.00328e-78
EF1288	conserved hypothetical protein		S	5			EF1284-EF1292	2.12417	3.42734e-31	-0.754762	5.18676e-13	-1.29948	6.97682e-45	-0.774161	4.55798e-15	-1.71044	6.69677e-92
EF0373	sensor histidine kinase		T	2	2.7.3.-		EF0372-EF0373	0.0712067	0.580426	-0.768117	1.93267e-05	1.71771	5.27145e-74	-0.29498	0.0406275	1.31073	4.01626e-27
EF1289	tail protein, putative		S	5			EF1284-EF1292	2.10733	2.30541e-93	-0.778764	2.41046e-21	-1.23924	1.22705e-74	-0.874579	3.56077e-23	-1.71909	1.60208e-109
EF1665	conserved hypothetical protein		X	5			EF1665	0.177708	0.564643	-0.838064	0.03383	2.18743	4.80976e-27	-0.694535	0.0661461	1.84293	1.45796e-16
EF0955	aldose 1-epimerase, putative		G	3		K01785	EF0955-EF0957	0.275344	0.063931	-0.870631	9.88969e-06	1.62892	6.88135e-52	-0.696955	5.55939e-06	1.18731	2.11619e-29
EF1721	pyrimidine operon regulatory protein PyrR	pyrR	F	3		K02825	EF1714-EF1721	-1.00099	0.0197311	-0.879133	0.00320462	-5.04864	1.10922e-53	-0.788854	0.0418101	-4.07812	2.62698e-25
EF2709	glycosyl hydrolase, family 2		G	3		K12111	EF2709-EF2710	-0.515754	3.38478e-05	-0.902845	6.94072e-10	1.64911	8.46076e-61	0.00633841	1	1.93933	1.16243e-77
EF3206	adhesion lipoprotein		R	5		K09815	EF3203-EF3206	0.990986	8.08146e-09	2.05283	8.99416e-36	-0.121054	0.562899	0.583885	2.34412e-05	-1.12473	2.08837e-15
EF3204	cobalamin synthesis protein/P47K family protein		R	5			EF3203-EF3206	1.00951	1.81221e-08	1.95538	2.54022e-30	-0.270681	0.186471	0.437608	0.00540812	-1.03295	4.27155e-11
EF1827	conserved hypothetical protein		S	5		K09121	EF1827-EF1828	1.0141	3.76956e-12	1.83073	1.79875e-34	-0.255101	0.158376	0.851398	1.75723e-12	-1.40105	5.31455e-17
EF0081	membrane protein, putative		X	5			EF0080-EF0081	-0.0549714	0.756724	1.13017	2.52166e-09	0.925496	3.95434e-07	0.928709	5.81046e-19	1.19589	5.1251e-52
EF0080	gls24 protein		X	5			EF0080-EF0081	-0.0181678	0.922863	1.08731	2.46235e-08	0.91807	2.25883e-06	0.622573	1.43859e-08	1.15756	4.62727e-35
EF0077	conserved hypothetical protein		X	5			EF0076-EF0079	0.0343123	0.855823	1.04858	7.94232e-09	0.949629	1.52902e-07	0.376579	0.000267744	1.1248	5.71316e-39
EF3310	oxidoreductase, short chain dehydrogenase/reductase family		IQR	4		K00068	EF3304-EF3310	0.382522	0.238608	1.03331	0.00019995	0.931653	0.000238191	0.803558	0.00138521	1.0018	6.40688e-06
EF2981	sigma-54 dependent DNA-binding response regulator		K	3		K17473	EF2975-EF2981	0.865093	0.0145355	1.00632	0.00361184	0.629505	0.0746186	0.267472	0.388478	-1.06136	0.00056056
EF0421	transcriptional regulator, MerR family		K	1			EF0421	0.120768	0.408673	-1.06125	9.67793e-06	-0.64829	3.24582e-05	-0.848524	8.40845e-07	-1.51045	4.21077e-21
EF0096	conserved hypothetical protein		S	5			EF0096	-0.35799	0.0225343	-1.06364	1.26565e-08	-0.672845	1.01058e-05	-0.66094	4.77225e-05	-1.09155	1.65775e-13
EF1939	conserved hypothetical protein		S	5			EF1939	0.0243739	0.960573	-1.09392	0.00179763	0.921794	2.2064e-05	-0.0818204	0.771258	1.1658	1.04414e-10
EF0066	Holliday junction DNA helicase RuvA	ruvA	L	1		K03550	EF0066-EF0067	0.485871	0.00137765	-1.16301	3.11963e-10	-0.292628	0.0228372	-0.630211	0.000128759	-1.03974	5.93996e-12
EF0757	hypothetical protein		X	5			EF0756-EF0757	0.322483	0.0593666	-1.68285	3.53769e-11	-0.352863	0.0515401	-0.856023	0.000139885	-1.13237	7.34984e-10
EF0098	L-serine dehydratase, iron-sulfur-dependent, beta subunit	sdhB-1	E	3	4.2.1.13	K01752	EF0097-EF0099	-3.75281	6.08251e-301	0.84057	6.64729e-19	-0.992965	4.32529e-57	0.181801	0.209945	-5.35922	3.8351e-91
EF2236	conserved hypothetical protein		S	5			EF2235-EF2237	-0.145027	0.647011	0.810096	0.00100437	0.964868	7.3766e-05	0.883011	0.000550785	1.21238	7.71633e-09
EF0104	arginine deiminase	arcA	E	3	3.5.3.6	K01478	EF0104-EF0105	-2.16128	6.54724e-161	0.767434	1.652e-18	-0.0501355	0.537305	0.402311	1.55993e-05	1.21351	6.39012e-56
EF0097	regulatory protein pfoR, putative		G	3			EF0097-EF0099	-4.23944	0	0.69818	5.81932e-14	-0.844947	7.0167e-22	0.214023	0.10879	-4.29846	4.98347e-91
EF0055	adhesion lipoprotein		P	2		K09815	EF0055-EF0057	0.173674	0.107302	0.668008	2.82499e-08	-0.715971	1.29612e-13	-0.374326	0.00309289	-1.09298	4.7146e-22
EF0809	membrane protein, putative		X	5			EF0807-EF0809	-0.244345	0.0414786	0.641053	0.000151805	0.795208	3.9686e-06	0.483469	4.5397e-07	1.11391	2.63813e-38
EF1141	MutT/nudix family protein		X	5		K03574	EF1141	-0.262373	0.00464937	0.540832	8.81479e-12	0.830234	7.01207e-32	0.229498	0.012164	1.10084	3.53634e-37
EF1036	nucleoside diphosphate kinase		X	5		K00940	EF1036	-0.0438367	0.692804	0.522387	4.96244e-06	0.93707	1.24803e-33	0.223102	0.0544535	1.09343	1.30013e-33
EF1622	conserved domain protein		X	5			EF1617-EF1622	0.935007	0.000688218	0.500922	0.190677	-0.00768061	1	-0.937682	0.00135552	-1.33012	9.5324e-07
EF1621	conserved hypothetical protein		X	5			EF1617-EF1622	0.875484	0.000566722	0.473625	0.0732858	-0.329157	0.220537	-0.637348	0.0130468	-1.04639	4.38694e-05
EF3237	DNA-directed RNA polymerase, beta-prime subunit	rpoC	K	1	2.7.7.6	K03046	EF3237-EF3238	0.393222	0.0505915	0.418443	0.0385033	-0.948584	1.11587e-06	0.0281229	0.816661	-1.22592	3.53479e-43
EF1181	nitroreductase family protein		C	3			EF1181	0.247936	0.00115574	0.404977	1.21943e-07	-0.744535	2.2007e-31	-0.00511471	0.956281	-1.06916	1.69778e-41
EF1117	amino acid ABC transporter, permease protein		E	3		K10040	EF1117-EF1120	-0.628554	3.72495e-10	0.343841	0.00010015	0.847646	8.31586e-08	-0.100919	0.197937	1.57776	7.05711e-96
EF3238	DNA-directed RNA polymerase, beta subunit	rpoB	K	1	2.7.7.6	K03043	EF3237-EF3238	0.380472	0.0499013	0.319187	0.100595	-0.968526	3.65912e-07	-0.0380568	0.731328	-1.2378	1.12286e-48
EF0381	conserved hypothetical protein		I	4			EF0381-EF0382	0.0393225	0.70669	0.298063	0.00155909	0.861978	4.79223e-28	0.230307	0.0278795	1.00017	2.21596e-26
EF2080	lipoprotein, YaeC family		P	2		K02073	EF2079-EF2082	1.07371	2.40962e-10	0.291846	0.167843	-0.13649	0.513102	-0.0381586	0.843004	-1.00793	2.60579e-11
EF0470	ribonucleoside-diphosphate reductase 2, beta subunit	nrdF	F	3		K00526	EF0470-EF0473	0.323029	0.062713	0.276566	0.103442	-0.364449	0.0225408	0.472705	1.06929e-06	-1.06199	7.2418e-44
EF3107	peptide ABC transporter, permease protein		EP	3		K02034	EF3107	-0.495055	0.00578848	0.272526	0.139673	0.50851	0.00564063	-0.29228	0.00317462	1.19543	2.65958e-50
EF0659	phage SPO1 DNA polymerase-related protein, putative		L	1		K21929	EF0659	0.296752	0.00392561	0.262677	0.00517819	-0.783982	7.77291e-18	0.0509074	0.643362	-1.22884	3.46052e-30
EF1921	inosine-uridine preferring nucleoside hydrolase		F	3	3.2.2.1	K12700	EF1919-EF1921	-0.539468	1.31737e-12	0.235443	0.000527179	0.258085	9.32857e-06	-0.89911	1.27417e-24	1.4455	1.40552e-79
EF1118	amino acid ABC transporter, permease protein		E	3		K10040	EF1117-EF1120	-0.569234	1.12726e-08	0.209481	0.0200082	0.607582	1.69427e-07	-0.327355	2.72746e-05	1.27104	1.79498e-62
EF0473	ribonucleoside-diphosphate reductase 2, NrdH-redoxin	nrdH	O	3		K06191	EF0470-EF0473	0.203342	0.0325967	0.201581	0.0236442	-0.669762	3.8159e-16	0.381947	2.0088e-08	-1.18852	4.53588e-64
EF2649	spermidine/putrescine ABC transporter, spermidine/putrescine-binding protein		E	3		K11069	EF2649-EF2653	0.458095	5.36737e-05	0.19447	0.118578	-0.598003	1.26986e-09	0.150782	0.276494	-1.15316	7.71773e-21
EF1605	hypothetical protein		X	5			EF1605	-0.46479	0.000333022	0.191487	0.198873	0.792179	3.3219e-19	0.327941	0.0353975	1.29154	4.73877e-31
EF3255	thiamin biosynthesis lipoprotein ApbE, putative		X	4		K03734	EF3254-EF3255	0.49315	0.0106047	0.174675	0.318794	-0.578315	0.000614919	-0.121474	0.310806	-1.0472	1.16668e-24
EF0708	conserved hypothetical protein		X	5			EF0708	0.0315133	0.861803	0.154303	0.34022	-0.690945	1.31803e-05	0.425241	0.00342936	-1.05636	2.73473e-12
EF1272	conserved hypothetical protein		K	1		K07742	EF1270-EF1275	0.395264	0.00306386	0.11818	0.139188	-0.653427	3.49531e-18	-0.312475	0.0210542	-1.04143	1.07508e-15
EF2905	ABC transporter, permease protein		G	3		K02026	EF2903-EF2907	0.326617	2.17216e-05	0.0994881	0.211068	-0.695431	3.75557e-26	-0.198924	0.0146377	-1.13551	2.83245e-43
EF0284	(3R)-hydroxymyristoyl-(acyl-carrier-protein) dehydratase	fabZ-1	I	3	4.2.1.-	K02372	EF0283-EF0284	-0.650918	0.000743986	0.0888008	0.636277	0.81099	6.94365e-06	0.0131888	0.904916	1.51032	2.87232e-51
EF2904	hypothetical protein		R	3			EF2903-EF2907	0.392222	0.00014072	0.0848856	0.337262	-0.848598	3.96026e-23	-0.124975	0.122229	-1.16186	1.36299e-44
EF1350	conserved hypothetical protein		X	5			EF1350	0.212107	0.236802	0.0741551	0.718522	-0.800141	3.82458e-06	0.0343596	0.89295	-1.22786	2.18454e-10
EF3071	hypothetical protein		X	5			EF3071	0.226704	0.474994	0.0501741	0.938365	0	0	0.373321	0.200813	-1.45189	8.24805e-06
EF3234	lipoprotein, putative		X	5			EF3234	-0.213567	0.0166244	0.0166617	0.845075	0.941851	1.29822e-39	0.0132958	0.889957	1.13442	1.09664e-45
EF0916	ribosomal protein L20	rplT	X	5		K02887	EF0914-EF0916	0.122663	0.501264	0.00718282	0.968733	-0.874804	4.06399e-07	0.178775	0.0876507	-1.03408	6.68843e-33
EF0429	TRAP dicarboxylate transporter, DctP subunit		G	3			EF0428-EF0431	0	0	0	0	0	0	0	0	1.14952	0.00523433
EF0433	rhamnulokinase, putative		G	3		K00848	EF0433-EF0436	0	0	0	0	0	0	0	0	-1.21051	0.0168404
EF2606	conserved hypothetical protein		X	4			EF2605-EF2606	0.48817	0.167173	0	0	-0.503067	0.201061	-0.581019	0.130647	-1.00284	0.00207582
EF1573	hypothetical protein		X	2			EF1573-EF1574	0.12456	0.183733	-0.0274706	0.799976	-0.755089	6.00959e-21	-0.561786	1.16463e-07	-1.18459	2.24775e-32
EF0245	decarboxylase family protein		R	5		K06966	EF0245	-0.379233	0.00807248	-0.0823181	0.449358	0.95867	5.86594e-31	0.42406	0.00212954	1.13198	5.31726e-19
EF0287	translation elongation factor P	efp	J	1		K02356	EF0287	0.0367953	0.708871	-0.103335	0.262038	-0.83619	2.41306e-22	-0.218295	0.00217953	-1.02512	2.42605e-38
EF0397	conserved hypothetical protein		S	5			EF0396-EF0397	-0.329055	0.000257706	-0.10844	0.184197	0.904005	5.93139e-50	-0.230508	0.0192633	1.16793	4.50386e-44
EF1934	conserved domain protein		X	5			EF1933-EF1935	0.162583	0.152155	-0.12183	0.451607	-0.537696	7.32628e-07	0.0426523	0.706035	-1.17428	3.32424e-20
EF1383	membrane protein, putative		X	5			EF1383-EF1384	0.189798	0.298218	-0.148208	0.502646	-0.994471	3.94791e-07	-0.3144	0.0958749	-1.26516	9.65134e-11
EF3235	gluconate kinase, putative		G	3		K00851	EF3235	-0.419846	3.2536e-07	-0.163855	0.0420529	0.628906	1.37758e-13	-0.16009	0.0693932	1.00589	2.34162e-37
EF1119	amino acid ABC transporter, amino acid-binding protein		E	3		K10039	EF1117-EF1120	-0.543458	1.84793e-08	-0.172294	0.13024	0.374731	0.0216476	-0.939315	3.35768e-35	1.18882	1.45448e-52
EF0762	excinuclease ABC, subunit B	uvrB	L	1		K03702	EF0762-EF0763	0.643871	8.47436e-11	-0.183509	0.00556529	-0.945538	1.56167e-58	0.294534	6.36253e-05	-1.52659	9.0071e-96
EF0402	Na+/H+ antiporter	nhaC-1	C	3		K03315	EF0402	-0.236828	0.021075	-0.195981	0.0392828	0.670973	2.38466e-23	0.854071	1.30546e-18	1.00756	5.51278e-26
EF3023	polysaccharide lyase, family 8		N	2		K01727	EF3023	0.474193	0.000164873	-0.213166	0.0981974	-0.934153	6.99953e-17	-0.816571	3.51299e-08	-1.41407	2.47393e-24
EF1248	hypothetical protein		X	5			EF1248	0.101494	0.336279	-0.259572	0.00851547	-0.946246	1.40745e-41	0.230209	0.00149972	-1.31326	2.87092e-66
EF2963	esterase, putative		I	3			EF2963	-0.263789	0.0281683	-0.260612	0.0293003	0.795445	4.47283e-21	-0.21484	0.14564	1.12175	6.85089e-28
EF3009	conserved hypothetical protein		X	5			EF3009-EF3012	0.284952	0.390703	-0.267823	0.467888	-0.534883	0.0922154	-0.0115774	1	-1.01314	0.00191466
EF0773	conserved hypothetical protein		X	5			EF0773	0.0786516	0.443904	-0.277641	0.035247	-0.838119	1.70987e-20	-0.574936	3.32745e-07	-1.17682	1.22115e-32
EF0944	extracellular protein, putative		S	5			EF0944	0.210809	0.0355941	-0.283038	0.00694648	-0.824896	3.46711e-42	-0.280144	0.0004261	-1.04096	1.27372e-46
EF2774	conserved hypothetical protein		K	1			EF2774	1.09252	8.35003e-10	-0.284855	0.305348	-0.801476	0.000555202	-0.70259	0.00105421	-1.31886	3.0194e-14
EF0990	cell division protein		X	4			EF0988-EF1002	0.391723	5.48828e-06	-0.294612	6.30437e-05	-0.890451	3.58728e-48	-0.295947	0.00107871	-1.19827	7.10933e-37
EF0641	L-lactate dehydrogenase	ldh-2	C	3	1.1.1.27	K00016	EF0641	-0.534318	7.88325e-05	-0.319231	0.030514	0.668308	4.14795e-11	0.124946	0.320868	1.23605	1.9979e-34
EF3024	hypothetical protein		X	5			EF3024	-0.0629928	0.879943	-0.320396	0.422771	-0.53562	0.111594	-0.342798	0.376494	-1.00993	0.00256146
EF2756	DNA-damage-inducible protein P	dinP	L	1		K02346	EF2756	0.718735	6.30512e-22	-0.333114	7.95512e-05	-0.871408	3.8966e-37	0.803461	2.34599e-26	-1.47456	9.23713e-71
EF2555	thymidine kinase	tdK	F	1	2.7.1.21	K00857	EF2552-EF2555	0.069883	0.368249	-0.335821	4.12153e-05	-0.734657	1.18489e-30	-0.985566	3.26643e-28	-1.07176	1.15969e-38
EF1240	sugar-binding transcriptional regulator, LacI family		K	3		K02529	EF1232-EF1240	-0.296237	0.00229994	-0.3446	0.000257835	0.797202	1.86154e-26	-0.11422	0.262881	0.998365	9.5701e-30
EF2366	conserved hypothetical protein		X	4			EF2366-EF2367	0.217032	0.0140389	-0.393051	4.82906e-05	-0.751735	5.47286e-18	-0.960174	2.30455e-22	-1.09089	2.66545e-37
EF1759	phosphate ABC transporter, phosphate-binding protein		P	2		K02040	EF1754-EF1759	-0.00770785	0.922095	-0.433233	1.80443e-10	-0.834781	1.24802e-40	-0.457881	9.37871e-08	-1.08551	8.48854e-41
EF2495	undecaprenyl diphosphate synthase	uppS	I	3	2.5.1.31	K00806	EF2494-EF2495	0.189561	0.0399265	-0.443383	8.44518e-05	-0.923681	9.34233e-28	-0.631811	3.69065e-10	-1.26335	3.38532e-37
EF1539	segregation and condensation protein B	scpB	X	5		K06024	EF1537-EF1539	0.343941	0.000317069	-0.443459	2.19354e-05	-0.754825	3.21353e-17	-0.49854	9.9641e-06	-1.27796	5.00768e-29
EF2924	metallo-beta-lactamase superfamily protein		R	5		K12574	EF2923-EF2924	-0.52183	0.00350118	-0.463808	0.00834581	0.700819	0.000170333	0.377794	0.000275038	1.09484	5.70538e-40
EF2169	membrane protein, putative		M	4			EF2169	0.0170496	0.876497	-0.484106	1.1798e-05	-0.895211	1.12638e-26	-0.163107	0.235499	-1.4125	3.79744e-34
EF2377	amino acid permease family protein		E	3			EF2377	0.0987427	0.329345	-0.490406	4.07816e-09	-0.786258	7.25044e-37	-0.0736051	0.36534	-1.01537	1.6248e-31
EF2906	ABC transporter, permease protein		G	3		K02025	EF2903-EF2907	0.419496	1.88549e-07	-0.506292	5.77562e-08	-0.663026	2.26667e-19	-0.424201	2.31984e-06	-1.30472	4.82776e-56
EF2160	regulatory protein GlnR	glnR	K	1		K03713	EF2159-EF2160	-0.790575	7.89049e-06	-0.546212	0.00175823	0.277496	0.120011	-0.259259	0.00387161	1.23053	4.34692e-49
EF1538	segregation and condensation protein A	scpA	S	5		K05896	EF1537-EF1539	0.248915	0.0144631	-0.546261	1.85003e-07	-0.61645	1.6273e-17	-0.894525	9.84004e-16	-0.995104	1.70649e-20
EF2666	ribosomal RNA large subunit methyltransferase A, putative		X	5		K00563	EF2666	0.652282	1.36597e-06	-0.567919	0.00150441	-0.617124	2.9783e-05	-0.734731	7.49127e-05	-1.38168	2.49597e-20
EF2547	hypothetical protein		X	5			EF2547	0.176061	0.162351	-0.575249	0.000141063	-0.412019	3.39055e-05	0.755582	6.26674e-06	-1.0203	4.7914e-13
EF1909	hypothetical protein		X	5			EF1909	0.238985	0.00522726	-0.608084	1.16296e-09	-0.693118	1.32907e-28	0.150617	0.107823	-1.01137	7.47503e-29
EF1062	N-acyl-D-amino-acid deacylase family protein		FR	3			EF1060-EF1062	-0.581035	0.000247784	-0.678744	8.37561e-05	0.776138	2.37428e-10	-0.284959	0.116861	1.18026	1.60527e-17
EF2048	conserved hypothetical protein TIGR00048		R	5		K06941	EF2048	0.150857	0.0697909	-0.695347	5.53654e-14	-0.969641	1.33533e-40	-0.71925	2.70814e-15	-1.43151	4.23487e-56
EF3160	hypothetical protein		X	5			EF3160	0.265856	0.292608	-0.717506	0.0202225	-0.161549	0.555803	-0.47254	0.0794478	-1.60154	4.14501e-09
EF0243	branched-chain amino acid transport system II carrier protein	brnQ	ER	3		K03311	EF0243	-0.453948	7.87725e-09	-0.790203	1.50714e-27	0.847593	5.29735e-22	-0.0818607	0.332128	1.19573	6.41822e-55
EF0825	uridine kinase	udk	F	3	2.7.1.48	K00876	EF0825	0.377756	0.00133239	-0.957949	7.64929e-09	-0.135972	0.196837	-0.623726	5.63349e-08	-1.13384	7.62667e-24
EF1262	hypothetical protein		R	5			EF1262-EF1263	0.216889	0.0860427	1.79651	1.36143e-49	1.29909	4.19186e-42	1.61793	7.58802e-62	0.57683	2.70136e-09
EF3302	hypothetical protein		X	5			EF3302	0.453542	0.0346095	1.7672	2.00886e-19	1.02377	5.37804e-07	1.34902	1.6674e-12	0.765632	4.22734e-06
EF1928	alpha-glycerophosphate oxidase		C	3	1.1.99.5	K00105	EF1927-EF1929	-0.287173	0.0332091	1.69536	1.26785e-47	1.36455	1.18195e-46	1.77335	2.77619e-62	0.806687	7.61113e-13
EF1657	membrane protein, putative		R	5		K07035	EF1657	0.397534	0.0657741	1.62862	4.12535e-25	1.10656	4.92876e-15	1.24911	1.34555e-11	0.921603	3.81669e-08
EF2220	conserved hypothetical protein		S	2			EF2218-EF2220	-0.07021	0.755671	1.61887	4.96959e-20	1.36882	5.25714e-17	2.65794	1.11822e-64	0.743915	1.84183e-05
EF1927	glycerol uptake facilitator protein	glpF	X	3		K02440	EF1927-EF1929	-0.248565	0.102211	1.11068	8.51483e-15	1.04752	6.04546e-19	1.60486	6.24867e-32	0.404213	0.0119605
EF0475	ferrous iron transport protein A	feoA	X	5		K04758	EF0475	4.9179	8.14262e-198	-1.27249	4.93715e-05	5.21417	0	-1.39101	3.69109e-35	0.335564	0.00085584
EF1771	conserved hypothetical protein TIGR00257		S	3			EF1771-EF1773	0.28547	0.0241531	-1.45639	3.26219e-16	1.11519	8.5677e-28	-1.41074	2.16631e-21	0.393606	0.000498156
EF0752	conserved hypothetical protein		X	5			EF0750-EF0754	0.368394	0.00408728	-1.71116	3.89515e-92	-1.04082	2.26772e-53	-2.10277	3.19715e-64	-0.80868	1.61691e-12
EF1218	spermidine/putrescine ABC transporter, permease protein		ER	3		K02054	EF1218-EF1223	1.17619	7.30498e-13	-1.74076	1.05771e-10	1.06787	1.06882e-09	-2.20603	3.98537e-31	-0.5697	1.39082e-05
EF0971	conserved hypothetical protein		X	5		K13256	EF0971	-0.0903296	0.508537	-1.79726	2.30281e-27	1.06624	1.10388e-32	-1.31652	1.87035e-13	0.55738	8.67845e-06
EF0083	hypothetical protein		X	5			EF0082-EF0083	-0.131299	0.115135	0.903317	1.23815e-20	-1.17859	4.01024e-54	1.04796	1.17219e-39	-0.903071	6.88112e-25
EF0769	conserved hypothetical protein		X	5			EF0769	-0.111029	0.181012	0.757025	2.24652e-15	-1.1658	1.84273e-66	1.09882	4.10352e-49	-0.789047	4.2148e-23
EF1980	hypothetical protein		X	5			EF1980	0.126095	0.331203	0.685528	6.25698e-10	1.06341	8.28656e-29	1.432	1.71663e-36	0.579357	1.95084e-05
EF2357	conserved hypothetical protein		X	5		K15977	EF2357	-0.104733	0.766036	0	0	1.40477	1.92916e-06	1.19902	0.000727863	0.895022	0.00842013
EF0694	PTS system, fructose-specific family, IIBC components		G	3		K02769	EF0693-EF0696	0.496364	0.0140735	3.67872	3.99871e-168	0.0283278	0.934699	4.22832	8.47355e-248	-0.793926	3.87942e-05
EF0695	PTS system, IIA component		GT	3	2.7.1.69	K02768	EF0693-EF0696	-0.101859	0.874198	2.92221	5.85262e-35	0.587926	0.0826874	4.1601	2.87511e-71	-0.204615	0.537435
EF1020	glycosyl hydrolase, family 1		X	5		K01223	EF1020	0.550622	2.87916e-09	2.76182	3.52018e-294	0.642139	2.31219e-17	2.88017	1.22494e-292	0.677642	1.12987e-16
EF1234	ABC transporter, substrate-binding protein, putative		G	3		K17318	EF1232-EF1240	0.381338	0.103401	2.75616	1.95265e-70	0.974857	3.33235e-07	1.99864	1.50311e-26	0.801148	2.14507e-05
EF1016	conserved hypothetical protein		X	3			EF1012-EF1016	-0.353975	0.250579	2.74136	5.21605e-42	0.551331	0.0243644	2.95975	4.50166e-46	0.886934	0.00106477
EF2646	glycerate kinase, putative		X	3		K00865	EF2646-EF2647	-0.384685	0.00994491	2.61089	5.84916e-148	0.53771	8.67114e-08	2.32858	9.07539e-69	0.976666	2.71391e-14
EF2223	ABC transporter, permease protein		G	3		K17319	EF2221-EF2223	-0.153326	0.149434	2.45947	7.87257e-243	0.0374992	0.647858	2.90291	1.41664e-223	0.440682	6.48775e-06
EF0696	tagatose 1,6-diphosphate aldolase	lacD-1	G	3	4.1.2.40	K01635	EF0693-EF0696	-0.435902	0.0790059	2.36705	3.20649e-46	-0.128173	0.576789	3.82129	1.76294e-125	-0.0460631	0.914292
EF2221	ABC transporter, substrate-binding protein		G	3		K17318	EF2221-EF2223	-0.475476	8.75924e-08	2.25585	2.84532e-108	0.190867	0.00608619	3.31265	0	0.3786	7.09244e-05
EF2959	ribose uptake protein, putative		G	3		K06216	EF2959-EF2962	0.381331	2.22178e-06	2.24323	5.4842e-102	0.387785	4.29035e-09	1.82348	4.46423e-115	0.592589	2.18194e-15
EF1395	molybdenum cofactor biosynthesis family protein		X	2			EF1386-EF1399	0.546345	0.164818	1.95705	2.01354e-09	0.741812	0.0333585	1.84451	2.5582e-12	-0.305634	0.483271
EF3212	PTS system, IIC component		X	5	2.7.1.69	K02795	EF3210-EF3213	0.326775	0.00140705	1.95504	3.57047e-44	0.371843	9.17012e-06	2.09127	3.84653e-92	0.789691	3.28447e-23
EF1394	conserved hypothetical protein		X	2			EF1386-EF1399	0.779099	0.0240575	1.85512	9.80226e-08	0.467304	0.152416	1.46013	3.38548e-08	0.58562	0.0461143
EF2966	transcriptional antiterminator, bglG family		GT	3			EF2964-EF2966	-0.107839	0.266235	1.84361	2.40522e-34	0.411205	3.75885e-07	1.43623	4.78501e-85	0.560234	8.73375e-16
EF0664	hypothetical protein		X	5			EF0664	0.00127757	0.972243	1.80471	1.54138e-55	-0.0856676	0.526144	1.80561	7.35502e-58	0.482496	0.000305025
EF0833	conserved hypothetical protein		X	5			EF0833	-0.359157	0.333496	1.79814	3.76902e-17	-0.365936	0.183247	1.68594	1.26173e-08	0.239393	0.504408
EF1951	phosphosugar-binding protein		M	4		K19504	EF1950-EF1953	-1.14008	9.57287e-07	1.74578	1.54018e-27	0.46145	0.0052045	3.25582	9.64756e-70	0.505985	0.0376665
EF1953	PTS system, IIC component		X	4	2.7.1.69	K19508	EF1950-EF1953	0.339838	0.0172141	1.73995	4.53385e-29	0.518248	3.85865e-05	1.03013	1.75034e-15	0.874016	4.10276e-12
EF3138	PTS system, IID component		X	3		K02796	EF3134-EF3142	-0.9203	0.000150266	1.71546	7.60958e-16	0.393518	0.034716	3.68787	6.38093e-69	0.84821	0.000176819
EF2569	conserved hypothetical protein		R	3		K07141	EF2563-EF2572	0.0619003	0.847642	1.71273	1.02381e-16	-0.00817447	1	2.15334	1.0572e-20	0.253234	0.339452
EF1019	PTS system, IIC component		G	3		K02761	EF1019	0.38314	0.0319297	1.70571	1.13947e-18	0.264774	0.12179	1.60013	4.38873e-51	0.307022	0.000175403
EF0832	conserved hypothetical protein		X	5			EF0832	0.0772862	0.75997	1.68741	2.56136e-13	-0.464102	0.0508864	1.26501	1.45834e-10	-0.389469	0.0565968
EF0717	PTS system, fructose-specific family, IIABC components		G	3		K02768	EF0717-EF0719	0.0758132	0.355525	1.60417	7.59413e-63	0.131754	0.0331625	1.24303	2.38387e-50	0.366461	1.76923e-05
EF0270	PTS system, beta-glucoside-specific IIABC component		G	5	2.7.1.69	K02755	EF0270-EF0272	-0.163702	0.217755	1.53696	3.77875e-46	0.743602	4.01979e-13	1.95218	9.83873e-63	0.918358	1.51362e-15
EF0028	PTS system, IIBC components		G	3	2.7.1.69	K02790	EF0028-EF0029	0.139452	0.630447	1.53348	1.32211e-10	0.321683	0.206023	1.86958	1.72122e-15	0.116074	0.67581
EF0678	acetyltransferase, GNAT family		J	1			EF0678	-0.160506	0.130145	1.50919	8.33191e-35	0.484599	2.96699e-08	1.52161	4.73339e-51	0.715286	4.94516e-13
EF2568	aminotransferase, class V		E	3			EF2563-EF2572	-0.372535	0.155006	1.50167	1.73932e-11	0.0376165	0.963052	2.84264	4.62386e-53	0.753995	0.00073113
EF1396	molybdenum cofactor biosynthesis family protein, putative		HI	2			EF1386-EF1399	0.212662	0.620814	1.43152	1.84591e-06	0.652245	0.0523363	2.08191	1.69484e-15	0.516189	0.086981
EF1360	dihydroxyacetone kinase family protein		G	3		K05878	EF1358-EF1361	-0.113175	0.243122	1.4238	3.469e-39	0.333564	3.90313e-05	1.88219	1.95372e-85	0.575741	1.44516e-15
EF1359	conserved hypothetical protein		S	3			EF1358-EF1361	-0.205181	0.00416325	1.31457	1.01524e-42	0.0214003	0.708184	1.83018	2.43075e-132	0.310277	2.29475e-05
EF1361	dihydroxyacetone kinase family protein		G	3		K05879	EF1358-EF1361	-0.184116	0.0186932	1.3046	1.68942e-45	0.49928	5.49843e-09	1.85509	1.63744e-156	0.76934	4.62538e-27
EF3035	universal stress protein family		T	3			EF3035	-0.0835577	0.624749	1.13549	1.27351e-10	-0.0574778	0.720208	1.10915	6.08669e-28	0.272692	0.000794959
EF1021	conserved hypothetical protein		R	5			EF1021	-0.199776	0.0460792	1.1331	3.44475e-41	-0.153878	0.0543179	2.28514	3.62915e-168	0.176221	0.0486876
EF0029	aminotransferase, class II		E	3		K14155	EF0028-EF0029	0.900333	0.0159414	1.11568	0.000979538	0.601614	0.108849	1.02527	0.000116052	-0.515711	0.0811141
EF0187	purine nucleoside phosphorylase	deoD-2	F	3	2.4.2.1	K03784	EF0185-EF0187	0.213271	0.207288	1.1086	2.39941e-10	-0.00137368	0.99342	1.14844	1.35701e-31	-0.0453084	0.538912
EF3136	PTS system, IIA component		G	3		K02793	EF3134-EF3142	-0.335576	0.297202	1.103	3.33303e-05	0.197503	0.421769	2.63927	3.57845e-31	0.237057	0.438213
EF1235	hypothetical protein		X	3			EF1232-EF1240	0	0	1.09976	0.00172976	0	0	1.12207	0.000427712	-0.00336178	1
EF1950	mocD family protein, putative		M	4		K19510	EF1950-EF1953	-0.643715	0.0219203	1.09744	7.15379e-06	0.415552	0.037682	2.36801	9.14023e-22	-0.216452	0.503634
EF0107	transcriptional regulator, Crp/Fnr family		T	3		K21828	EF0106-EF0107	-2.98618	9.72754e-136	1.06772	4.56679e-48	-0.23385	0.000617363	1.15827	3.61747e-16	0.84887	4.69146e-10
EF1345	sugar ABC transporter, sugar-binding protein		G	3		K15770	EF1343-EF1345	0.234112	0.0225834	1.03096	1.62769e-28	-0.324106	0.000121662	1.24951	1.28198e-36	-0.176338	0.0837042
EF1344	sugar ABC transporter, permease protein		G	3		K15771	EF1343-EF1345	0.39537	0.0466246	1.007	4.20857e-08	0.406091	0.0383228	1.4113	1.41518e-18	-0.211356	0.23536
EF3286	phosphosugar-binding transcriptional regulator, putative		K	1			EF3286	-0.0749995	0.759108	-0.995846	0.000196757	0.400906	0.0277736	-1.25752	1.15372e-08	0.268872	0.050551
EF1220	spermidine/putrescine ABC transporter, ATP-binding protein		E	3		K02052	EF1218-EF1223	1.49319	5.69806e-66	-1.05681	1.60192e-11	0.719386	4.07311e-24	-1.652	3.47803e-64	-0.842863	8.43434e-24
EF2886	transcriptional regulator, MarR family		K	3			EF2875-EF2886	-0.00823469	0.940329	-1.06307	2.5421e-24	0.136517	0.146647	-1.19841	1.40209e-44	-0.0804359	0.294338
EF1508	hypothetical protein		X	5			EF1508	-0.22086	0.161543	-1.07113	5.60301e-06	0.0303136	0.863646	-1.22302	9.90832e-09	-0.20973	0.162558
EF2883	enoyl-(acyl-carrier-protein) reductase II	fabK	R	3		K02371	EF2875-EF2886	0.116251	0.128631	-1.11927	3.17557e-47	0.341939	1.68111e-08	-1.59573	3.63097e-72	-0.134767	0.0834349
EF1634	propanediol utilization protein PduU		X	2		K04031	EF1632-EF1634	0.0112089	0.973861	-1.14061	5.92693e-09	0.55049	3.70566e-05	-1.1035	5.45562e-08	0.609844	4.19564e-05
EF2431	chlorohydrolase family protein		FR	3		K01487	EF2430-EF2431	1.08728	2.88044e-36	-1.15321	7.71006e-24	0.580759	2.31997e-15	-1.64401	2.95317e-75	-0.390069	3.74869e-07
EF0848	holo-(acyl-carrier-protein) synthase	acpS	I	3	2.7.8.7	K00997	EF0848-EF0850	0.371959	0.0118555	-1.28462	9.66528e-11	0.214454	0.112128	-1.0049	1.28776e-08	-0.490558	0.000418962
EF0855	conserved domain protein		X	5			EF0855	0.319639	0.190588	-1.34639	3.43127e-05	0.962995	2.41384e-07	-1.04769	1.65144e-06	0.0661243	0.718927
EF0755	conserved hypothetical protein		X	5			EF0755	0.273065	0.0528436	-1.41675	5.261e-13	-0.971205	1.80257e-10	-1.56989	1.70361e-17	-0.941225	7.89436e-11
EF0754	conserved hypothetical protein		X	5			EF0750-EF0754	0.321304	0.00412983	-1.50975	2.04053e-100	-0.790252	9.01443e-32	-1.71364	4.14541e-64	-0.553359	5.40711e-10
EF0753	hypothetical protein		X	5			EF0750-EF0754	0.408873	0.0263235	-1.58725	1.82195e-55	-0.861809	6.3184e-21	-2.09864	4.97007e-67	-0.700653	8.46899e-11
EF1219	spermidine/putrescine ABC transporter, permease protein		ER	3		K02053	EF1218-EF1223	1.27221	1.54191e-36	-1.74378	5.4469e-28	0.607721	3.32525e-11	-2.45037	1.48798e-74	-0.708836	1.06658e-14
EF2629	hypothetical protein		X	4			EF2628-EF2631	0.112386	0.812978	-1.99438	5.16749e-06	-0.5714	0.0916324	-1.50319	0.000253288	-0.0345831	0.962016
EF0774	conserved hypothetical protein		S	5			EF0774	-0.0874733	0.749905	-2.06398	2.24438e-08	-0.20798	0.385065	-1.8903	3.04005e-07	-0.397335	0.103811
EF1093	cell wall surface anchor family protein		M	4			EF1091-EF1094	-0.224156	0.261051	-2.27671	5.44798e-36	-0.890003	1.15218e-06	-2.24595	6.29563e-66	-0.786357	1.01851e-12
EF1092	cell wall surface anchor family protein		M	4			EF1091-EF1094	-0.124337	0.525933	-2.4212	4.52434e-89	-0.614881	0.000289625	-2.68914	1.66777e-94	-0.614801	4.04202e-07
EF1091	von Willebrand factor type A domain protein		M	4			EF1091-EF1094	-0.124401	0.521383	-2.58607	1.04359e-118	-0.439148	0.0102976	-2.72885	1.2409e-89	-0.54547	4.4601e-06
EF3137	PTS system, IIB component		X	3		K02794	EF3134-EF3142	-1.06833	0.00010087	0.942355	1.24928e-05	0.184055	0.402738	3.07152	4.53067e-27	0.626565	0.0202921
EF1343	sugar ABC transporter, permease protein		G	3		K15772	EF1343-EF1345	0.363014	0.0816152	0.88348	5.63631e-05	0.632372	0.00217094	1.26223	3.98862e-12	0.196345	0.283901
EF2440	celC-related protein		X	5			EF2440	-0.259196	0.00977297	0.851363	6.44199e-19	-0.84984	2.56582e-19	1.13407	1.73768e-31	-0.370626	0.001105
EF3135	mannonate dehydratase, putative		G	3		K01686	EF3134-EF3142	-0.0670626	0.725514	0.844149	3.97589e-06	0.243709	0.246136	1.56832	1.40143e-17	0.000428632	1
EF3134	2-dehydro-3-deoxyphosphogluconate aldolase/4-hydroxy-2-oxoglutarate aldolase	eda-2	G	3		K01625	EF3134-EF3142	-0.253705	0.403511	0.840551	0.000321943	0.260047	0.224257	1.54166	1.88467e-09	0.26586	0.398253
EF3193	LrgB family protein		X	1		K05339	EF3193-EF3197	-0.39996	0.000901427	0.824783	2.17288e-06	0.301227	0.0667981	1.45262	4.96435e-41	0.731206	3.67012e-14
EF1981	hypothetical protein		X	2			EF1981-EF1982	-0.0338253	0.80826	0.806697	2.87351e-09	0.256237	0.0405972	1.01576	7.27965e-14	0.51034	0.000124498
EF0461	PTS system, IIA component		G	5	2.7.1.69	K02793	EF0455-EF0461	-0.23295	0.233204	0.801824	1.33024e-05	0.25994	0.177219	1.21422	4.10605e-17	0.597539	9.08941e-05
EF3324	sodium ion-translocating decarboxylase, beta subunit		X	3		K01572	EF3317-EF3326	0.454296	0.000159873	0.786227	1.18611e-11	-0.375462	0.000233117	1.31456	1.47028e-34	-0.312351	0.00563135
EF0456	PTS system, IID component		X	5		K02796	EF0455-EF0461	-0.186482	0.543313	0.718706	0.0198198	0.225046	0.491975	1.05012	0.000111568	0.576246	0.0258984
EF3325	sodium ion-translocating decarboxylase, biotin carboxyl carrier protein		I	3			EF3317-EF3326	0.796269	2.68188e-10	0.71711	5.63567e-08	-0.78368	1.82787e-08	1.21239	1.30791e-27	-0.934565	4.47228e-12
EF2581	oxidoreductase, pyridine nucleotide-disulfide family		ER	3		K12527	EF2577-EF2582	0.186509	0.365518	0.694722	0.000395089	0.278131	0.208841	1.05133	2.95241e-09	0.195307	0.298753
EF0296	Na+/H+ antiporter	napA	P	2			EF0295-EF0296	-0.214402	0.0571335	0.692869	8.50377e-15	-0.127271	0.129538	1.29141	5.77237e-46	0.0964399	0.273273
EF3323	conserved hypothetical protein		X	3			EF3317-EF3326	-0.273465	0.190247	0.659939	0.00124228	-0.194661	0.310094	1.29076	2.96737e-10	0.519295	0.00711211
EF0050	conserved hypothetical protein		X	3			EF0050-EF0051	0.301115	0.0118167	0.636622	1.39377e-07	0.0829248	0.315622	1.27418	4.37493e-53	-0.38328	4.68691e-06
EF1236	acetyl xylan esterase, putative		Q	3		K01060	EF1232-EF1240	-0.0554413	0.857584	0.632478	0.00276045	-0.19678	0.429569	1.09101	8.44203e-09	-0.121362	0.536592
EF3327	citrate transporter		C	3		K03300	EF3327	0.44294	0.0130313	0.59797	0.00113324	-0.0802711	0.632489	1.54881	1.21937e-25	-0.610805	0.000162155
EF2435	PTS system, IIBC components		G	3	2.7.1.69	K02809	EF2434-EF2437	-0.279322	0.0672185	0.58537	1.32985e-05	0.116342	0.363462	1.22982	6.61651e-20	0.643559	9.95411e-07
EF2567	selenide, water dikinase	selD	E	3	2.7.9.3	K01008	EF2563-EF2572	0.384039	0.251869	0.558801	0.0605168	-0.366596	0.210947	1.5588	2.12455e-11	-0.464937	0.0836178
EF0633	tyrosyl-tRNA synthetase	tryS-1	J	1	6.1.1.1	K01866	EF0633	0.211149	0.249009	0.474204	0.00840684	-0.682782	4.47262e-05	1.0789	8.25133e-24	-0.55155	3.77218e-11
EF1801	PTS system, IIA component		G	3		K02793	EF1801-EF1805	-0.284025	0.437399	0.45823	0.178133	0.107077	0.764989	1.06189	0.00104695	0.495348	0.118987
EF1846	hypothetical protein		X	5			EF1846	0.405154	0.0197373	0.270474	0.155404	0.481659	0.00169566	1.11162	7.35389e-14	-0.112716	0.479312
EF1802	PTS system, IID component		X	3		K02796	EF1801-EF1805	-0.837844	0.000314664	0.267409	0.225654	-0.210555	0.286699	1.0964	3.45295e-07	0.731555	0.000718752
EF1898	ribosomal protein L19	rplS	X	5		K02884	EF1898-EF1900	0.39446	0.0384119	0.25234	0.0702603	0.628781	0.000735502	1.08724	8.68474e-17	-0.0492405	0.712353
EF1803	PTS system, IIC component		X	3		K02795	EF1801-EF1805	-0.957848	0.000266795	0.200128	0.355051	-0.46423	0.0306412	1.39614	6.13962e-08	0.041546	0.903023
EF2580	D-hydantoinase		F	3	3.5.2.2	K01464	EF2577-EF2582	-0.45181	0.146877	0.122709	0.747747	-0.754919	0.0189073	1.35248	5.62806e-06	-0.312541	0.362776
EF3171	recA protein	recA	L	1		K03553	EF3166-EF3172	0.542887	0.00209676	0.0925138	0.58394	-0.34584	0.0337787	1.11473	1.47288e-27	-0.721172	8.20221e-22
EF3116	ribosomal protein L28	rpmB	J	1		K02902	EF3116	-0.481727	0.000188406	0.0850283	0.428055	0.177481	0.110566	1.22531	8.8296e-32	0.263054	0.115289
EF0432	transcriptional regulator, AraC family		X	5			EF0432	0	0	0	0	0	0	1.13368	0.00294594	0.27447	0.491874
EF1397	molybdenum ABC transporter, molybdenum-binding protein		P	2		K02020	EF1386-EF1399	0.233079	0.647557	0	0	0.45124	0.214098	1.84864	1.38146e-08	0.790987	0.0144743
EF1837	PTS system, IIB component, putative		G	3		K20113	EF1836-EF1838	0	0	0	0	0	0	1.3746	0.00131332	0
EF2566	conserved hypothetical protein		O	3			EF2563-EF2572	-0.906409	0.00384327	-0.0433721	0.895522	-0.327819	0.208859	1.80848	7.1964e-11	0.418055	0.199305
EF0869	transcriptional regulator, Cro/CI family		K	1		K07729	EF0869	0.303445	0.0121083	-0.0771978	0.601368	-0.582777	2.008e-06	1.62165	3.10931e-31	-0.984149	4.17029e-17
EF2072	aminotransferase, class V		E	3		K04487	EF2071-EF2073	-0.20738	0.0335429	-0.162734	0.0742304	-0.660679	5.43547e-15	-1.11407	7.68561e-48	-0.526375	1.10308e-12
EF2225	transcriptional regulator, MerR family		K	1			EF2225	0.317791	0.000570509	-0.206331	0.0394128	-0.503637	1.35637e-09	-0.997825	2.82465e-20	-0.975037	1.64866e-16
EF3284	cystathionine gamma-synthase, putative		E	3			EF3284-EF3285	0.0909851	0.802756	-0.256334	0.450514	0.209407	0.413173	1.06904	6.54622e-05	-0.164338	0.616975
EF2987	conserved hypothetical protein		M	4		K02005	EF2985-EF2987	0.0667934	0.57502	-0.268506	0.011907	-0.0767881	0.406908	-1.11239	3.51149e-17	0.0458465	0.695835
EF1590	protease synthase and sporulation negative regulatory protein pai 1, putative		X	5			EF1589-EF1590	0.422409	4.19887e-05	-0.3074	0.0072089	0.734651	2.51175e-19	-1.0001	1.25288e-19	0.0300705	0.740584
EF2066	transcriptional regulator, TetR family		K	1			EF2066	0.735319	0.0185276	-0.307525	0.529711	0.117825	0.772338	-1.18156	0.000602836	-0.178124	0.537759
EF2672	conserved hypothetical protein		S	4			EF2672-EF2673	0.165754	0.0253591	-0.331943	0.000175371	-0.168801	0.00499815	-1.32438	8.51438e-54	-0.612695	3.86014e-16
EF0719	transcriptional regulator, DeoR family		KG	3		K03436	EF0717-EF0719	-0.225479	0.00261533	-0.464398	5.12675e-11	-0.889141	2.93454e-52	-1.22758	6.19075e-45	-0.560467	1.57865e-14
EF2564	conserved domain protein		X	3			EF2563-EF2572	-0.465836	0.147631	-0.466441	0.25721	-0.282077	0.385907	1.04251	0.000774047	-0.834491	0.0209432
EF2078	hypothetical protein		X	5			EF2078	0.251215	0.398347	-0.471271	0.154082	0.114368	0.767099	-1.43743	8.19288e-06	-0.784247	0.00139682
EF0688	ABC transporter, ATP-binding protein		V	4		K01990	EF0688-EF0689	-0.353346	5.07387e-05	-0.481212	8.57872e-11	-0.0104206	0.861099	-1.1467	4.5597e-37	0.264306	0.000741996
EF2367	N-acetylmuramoyl-L-alanine amidase, family 4		NU	4			EF2366-EF2367	0.0264291	0.751436	-0.502876	1.04842e-09	-0.39926	5.46022e-09	-1.32858	1.9724e-45	-0.449484	1.74521e-08
EF1556	conserved hypothetical protein		R	1			EF1556-EF1559	-0.00635951	0.942501	-0.583183	6.2959e-11	0.0855016	0.305477	-1.07445	1.86604e-24	-0.042842	0.675724
EF1120	amino acid ABC transporter, ATP-binding protein		E	3		K10041	EF1117-EF1120	-0.462769	3.70994e-06	-0.607033	4.42807e-11	0.282184	0.000655302	-1.20906	3.05078e-44	0.980559	9.1522e-45
EF2894	general stress protein 13, putative		J	1		K07570	EF2894	-0.0496198	0.569781	-0.628734	3.35513e-11	-0.50962	7.64074e-13	-1.12995	2.57415e-26	-0.709584	2.3083e-13
EF1316	transcriptional regulator, Cro/CI family		X	5			EF1316	0.669822	1.47605e-07	-0.644623	0.000461258	0.367515	0.00252986	-1.0884	4.432e-13	-0.692763	4.69066e-10
EF2696	MutT/nudix family protein		LR	5		K01515	EF2694-EF2696	-0.159744	0.0461712	-0.660121	3.65223e-18	-0.370019	1.33345e-09	-1.11171	3.46778e-27	-0.444856	4.26893e-07
EF2645	conserved domain protein		KT	5		K02647	EF2645	-0.297373	0.0187551	-0.690824	3.67023e-07	-0.910458	1.36078e-14	-1.3305	9.05875e-17	-0.627008	2.0321e-05
EF1297	transcriptional regulator, PadR family		K	5		K10947	EF1297-EF1299	1.0776	2.94713e-06	-0.695352	0.0350409	0.311918	0.209986	-1.59339	1.44024e-09	-0.783697	4.12153e-05
EF0893	amino acid ABC transporter, amino acid-binding/permease protein		ER	3		K02029	EF0891-EF0893	0.441827	9.85641e-05	-0.700426	3.0975e-07	0.537536	5.43883e-08	-1.06786	9.4879e-23	0.0571105	0.615875
EF1363	hydroxymethylglutaryl-CoA synthase		I	3	2.3.3.10	K01641	EF1363	0.131827	0.0742296	-0.704638	1.21507e-17	-0.12928	0.0375738	-1.03104	2.71003e-30	-0.473013	1.89442e-08
EF1144	lipoate-protein ligase A family protein, putative		H	5		K16869	EF1142-EF1144	-0.0416743	0.612005	-0.747791	2.03062e-27	0.145408	0.00917237	-1.16364	1.5809e-40	-0.00595017	0.944429
EF1932	oxidoreductase, pyridine nucleotide-disulfide family		R	5			EF1931-EF1932	0.00569119	0.941996	-0.780424	3.04677e-13	0.335947	6.31453e-05	-1.16875	1.28535e-18	0.0620237	0.504174
EF0904	mevalonate kinase	mvk	I	3	2.7.1.36	K00869	EF0901-EF0904	0.37673	0.0034137	-0.781028	5.92917e-07	0.0122586	0.957526	-1.10204	2.17891e-13	-0.756593	7.92117e-08
EF1738	conserved hypothetical protein		X	5			EF1736-EF1738	0.0492012	0.61067	-0.842863	1.66744e-13	-0.650919	1.98765e-15	-1.04996	4.56863e-22	-0.901898	3.59184e-21
EF1537	integrase/recombinase XerD, putative		L	5		K04763	EF1537-EF1539	-0.0866766	0.386407	-0.853008	6.67919e-15	-0.490587	3.27055e-08	-1.12345	1.50113e-20	-0.582845	7.25871e-09
EF0856	aldo/keto reductase family protein		T	2		K01104	EF0856	-0.122376	0.32219	-0.877176	1.27034e-09	-0.0421839	0.679221	-1.35344	2.53633e-15	-0.141615	0.247836
EF1651	abortive infection protein		X	5		K07052	EF1651	-0.109354	0.436854	-0.8859	1.14478e-06	0.425423	0.000358282	-1.27526	1.39241e-12	0.0329427	0.852011
EF1816	conserved hypothetical protein		R	5		K06167	EF1816	-0.0874932	0.457182	-0.890575	1.06781e-10	-0.230924	0.0240818	-1.70354	4.08212e-26	-0.517528	9.75231e-06
EF1684	DegV family protein, putative		S	5			EF1678-EF1684	-0.29128	0.00111046	-0.89212	4.50608e-30	-0.665165	9.1304e-22	-1.08709	4.23014e-31	-0.421766	5.00586e-06
EF1221	spermidine/putrescine ABC transporter, spermidine/putrescine-binding protein		E	3		K02055	EF1218-EF1223	1.1105	9.46335e-31	-0.896071	3.83919e-22	0.472863	1.29446e-14	-1.15366	5.04993e-28	-0.537631	7.76432e-08
EF2913	conserved hypothetical protein		S	2			EF2911-EF2913	0.0419592	0.627529	-0.903926	7.79366e-20	-0.0893023	0.160143	-1.48206	9.7333e-45	-0.475224	3.6734e-07
EF1595	MutT/nudix family protein		LR	4		K03574	EF1592-EF1595	0.0356515	0.85143	-0.936136	0.0011367	0.229109	0.307614	-1.14645	3.82553e-05	-0.00494381	1
EF3056	sortase family protein		M	4		K07284	EF3056	-0.37002	0.000128307	-0.987799	4.83063e-15	-0.329104	8.69041e-06	-1.76219	1.59565e-42	-0.0191843	0.859231
EF1661	branched-chain alpha-keto acid dehydrogenase, E3 component, dihydrolipoamide dehydrogenase	bkdD	C	3	1.8.1.4	K00382	EF1658-EF1663	0	0	3.21849	1.9063e-14	2.08797	5.58014e-06	0	0	0
EF1013	PTS system, IIC component		G	3		K02761	EF1012-EF1016	0.496714	2.74248e-06	2.0276	5.40286e-102	1.08309	1.11981e-40	0.929486	3.04943e-18	0.809821	1.26539e-17
EF1662	butyrate kinase	buk	C	3		K00929	EF1658-EF1663	0.542066	0.130468	1.85875	4.2501e-09	1.56936	2.04662e-08	-0.0993739	0.798049	0.663953	0.0195329
EF1659	branched-chain alpha-keto acid dehydrogenase, E1 component, beta subunit	bkdB	C	3	1.2.4.4	K00167	EF1658-EF1663	0	0	1.84154	1.36546e-05	1.54997	0.00011211	0	0	0
EF1663	branched-chain phosphotransacylase	ptb	C	3		K00634	EF1658-EF1663	0	0	1.83161	8.91602e-07	1.26067	0.000725314	0	0	0
EF0361	chitinase, family 2		G	3			EF0361	0.645982	7.01137e-07	1.54744	7.80816e-26	1.1536	2.60482e-28	0.565374	1.1104e-05	0.398641	0.000338262
EF2997	peptidase, M20/M25/M40 family		E	3		K02083	EF2996-EF2997	0.560909	0.000321465	1.35556	1.36107e-17	1.42455	3.49626e-21	0.471881	0.000618367	0.892939	1.35493e-12
EF0711	conserved hypothetical protein		X	5			EF0711	0.68363	0.0500439	1.07412	0.00521498	2.09786	3.77156e-12	0.909051	0.00350948	0.857867	0.000745919
EF2197	glycosyl transferase, group 2 family protein		R	4		K07011	EF2195-EF2198	0.012645	0.948775	-1.05298	3.96409e-09	1.41255	1.14896e-53	-0.420404	0.000653182	0.939907	1.96654e-20
EF0369	hydrolase, haloacid dehalogenase-like family		R	5			EF0369	0.39216	0.0162041	-1.05611	1.49941e-07	1.16504	4.5889e-15	-0.360732	0.02042	0.398297	0.00655307
EF1324	conserved hypothetical protein		X	5			EF1324	0.309578	0.0339319	-1.07793	9.12367e-07	1.02948	1.05981e-15	-0.497242	0.0106032	0.493271	0.0057478
EF0086	conserved domain protein		X	5			EF0084-EF0086	0.539186	0.0373151	-1.12862	0.000647782	1.28656	8.20303e-10	-0.950391	0.000314492	0.339792	0.0942728
EF1059	conserved hypothetical protein		TQ	2			EF1059	0.0868575	0.625965	-1.13548	1.01862e-07	1.21523	1.66868e-21	-0.904223	3.02495e-08	0.589042	1.32129e-05
EF2340	C-5 cytosine-specific DNA methylase		L	1	2.1.1.73	K00558	EF2339-EF2340	0.066036	0.834673	-1.2015	0.0026525	1.11088	8.62029e-08	-0.392239	0.188362	0.911611	1.64874e-05
EF1041	xanthine/uracil permeases family protein		R	5		K06901	EF1041	0.463579	2.77857e-06	-1.26494	6.32873e-51	1.05824	5.61737e-32	-0.761564	1.26093e-15	0.45934	2.14092e-07
EF1090	hypothetical protein		X	5			EF1090	-0.0470585	0.908941	-1.28961	0.000101425	1.37845	1.00464e-09	-0.362051	0.168087	0.812586	2.88986e-05
EF0852	hypothetical protein		X	5			EF0851-EF0853	0.0987569	0.771284	-1.5169	0.000212126	1.33861	7.04088e-09	-0.940246	0.011225	0.716438	0.00298156
EF1052	hypothetical protein		X	5			EF1052	-1.21944	0.0108892	-2.12752	5.07048e-05	-1.07336	0.0183841	-0.487378	0.201756	-0.259486	0.282752
EF3314	cell wall surface anchor family protein		X	5			EF3314	0.435362	3.26496e-05	0.836444	6.41997e-14	1.63356	1.51141e-100	0.0751038	0.461229	0.774741	1.4048e-17
EF1263	hypothetical protein		X	5			EF1262-EF1263	0.228683	0.0211802	0.766919	9.27206e-15	1.05984	1.10348e-43	0.235434	0.0244256	0.10093	0.240814
EF0021	PTS system, mannose-specific IIC component		X	5	2.7.1.69	K02795	EF0020-EF0024	0.123951	0.493744	0.758844	2.76733e-05	-1.10218	2.52287e-09	0.779008	2.60219e-12	-0.696295	2.26292e-16
EF0022	PTS system, mannose-specific IID component		X	5		K02796	EF0020-EF0024	0.031964	0.864681	0.755605	4.96947e-05	-1.24142	1.47926e-10	0.847509	9.15933e-13	-0.87059	9.64042e-20
EF2710	amino acid permease family protein		E	3			EF2709-EF2710	0.269646	0.4457	0.688744	0.0570554	1.41497	9.18542e-07	-0.233546	0.569413	0.866434	0.00288991
EF2391	NifU family protein		C	3		K04488	EF2388-EF2394	1.93324	1.45759e-80	0.640247	2.40323e-18	1.36784	6.53609e-113	0.203203	0.011637	-0.3732	5.0154e-08
EF1398	molybdenum ABC transporter, permease protein		P	2		K02018	EF1386-EF1399	0.741801	0.039874	0.626435	0.169238	1.38707	8.80247e-06	0.622007	0.0339644	0.188008	0.588145
EF1810	general stress protein A	gspA-1	M	4			EF1810-EF1811	0.633463	1.67746e-06	0.61244	2.96212e-05	1.82354	4.21414e-66	-0.295725	0.0336117	0.864456	3.11791e-15
EF1711	carbonic anhydrase, putative		X	1		K01674	EF1710-EF1711	-0.0922343	0.333643	0.569922	2.70518e-10	-1.0196	1.26707e-35	-0.162289	0.0245887	-0.830182	2.21994e-34
EF2392	aminotransferase, class V		E	3		K11717	EF2388-EF2394	1.96182	1.03172e-29	0.543036	1.4106e-09	1.34925	2.47623e-60	-0.0904041	0.34262	-0.36334	2.478e-06
EF1811	general stress protein A	gspA-2	M	4			EF1810-EF1811	0.68188	0.000154116	0.512396	0.005754	1.4005	1.95822e-23	-0.499455	0.00829921	0.52979	0.000832133
EF1586	NADH oxidase	nox	R	5	1.6.99.3		EF1586	0.924683	8.50498e-07	0.511393	0.00516258	1.13266	1.33504e-09	0.297463	0.00704589	0.428327	4.4276e-07
EF2393	conserved hypothetical protein		X	3		K09015	EF2388-EF2394	1.91579	3.00323e-28	0.505174	1.42524e-08	1.10141	1.08595e-40	-0.1154	0.225794	-0.508004	3.5231e-11
EF0477	hypothetical protein		X	5			EF0475	6.27862	8.8444e-307	0.481365	0.247991	6.40317	0	0.480022	3.10708e-08	0.184536	0.0211044
EF2621	conserved hypothetical protein		R	5		K06975	EF2621-EF2622	-4.76725	3.44522e-109	0.470473	0.0125642	-4.6352	6.07595e-109	0.588561	2.57664e-11	0.157929	0.0797963
EF2390	conserved hypothetical protein		X	3		K09014	EF2388-EF2394	1.86956	5.50614e-26	0.46007	1.4482e-07	1.48435	5.98676e-20	0.187335	0.0581885	-0.171925	0.0253413
EF0476	ferrous iron transport protein B	feoB	P	5		K04759	EF0475	5.78599	1.69168e-292	0.448327	0.000218274	5.96806	5.21986e-189	0.346755	0.00173704	0.37988	3.34197e-05
EF3063	immunity protein, putative		X	5			EF3063	-0.0273192	0.962478	0.443885	0.0687411	-1.12759	6.66729e-07	0.0956633	0.690972	-0.729814	0.000574795
EF0082	major facilitator family transporter		X	5			EF0082-EF0083	-0.193426	0.0456636	0.4342	1.45608e-06	-1.14424	4.9896e-42	0.895972	1.12944e-25	-0.763836	6.36102e-28
EF1038	lipoprotein, putative		X	5			EF1038	0.128185	0.45532	0.41962	0.0204205	1.34803	5.93876e-27	0.0933019	0.639517	0.936637	1.9002e-10
EF2889	2-hydroxy-3-oxopropionate reductase	glxR	I	3	1.1.1.60	K00020	EF2889	-0.17868	0.0747642	0.371231	0.000106565	-1.07025	7.14399e-35	0.035791	0.617771	-0.774604	6.00335e-30
EF0438	conserved domain protein		G	3			EF0437-EF0438	0.47478	0.163339	0.358754	0.279223	1.51268	4.00516e-10	-0.411792	0.167159	0.479167	0.0640294
EF0357	conserved hypothetical protein		R	5			EF0356-EF0358	0.072217	0.54334	0.353993	0.00265931	1.00182	1.46335e-24	-0.156293	0.216348	0.907445	6.01815e-20
EF2922	conserved hypothetical protein		S	5		K09790	EF2922	0.240649	0.514532	0.342652	0.389969	1.39974	2.0975e-07	0.143401	0.667792	0.690566	0.00103635
EF2770	conserved hypothetical protein		S	2		K16925	EF2767-EF2770	0.75016	1.82113e-09	0.337591	0.0179805	1.18788	8.75059e-28	0.00353655	0.985124	0.516886	1.97787e-05
EF2769	ABC transporter, ATP-binding protein		P	2		K16786	EF2767-EF2770	0.550989	5.28793e-08	0.292186	0.00421182	1.03787	5.39687e-41	-0.163595	0.151172	0.638642	1.18748e-12
EF0970	ribosomal protein L27	rpmA	X	5		K02899	EF0968-EF0970	-0.111345	0.548541	0.249938	0.177453	-1.17097	1.40906e-09	0.471657	7.47884e-05	-0.979299	3.07523e-22
EF2622	conserved hypothetical protein		S	5			EF2621-EF2622	-5.11572	3.16676e-113	0.232155	0.215136	-5.01733	2.8537e-116	0.24312	0.0290967	0.313975	0.000741348
EF0654	sugar-binding transcriptional regulator, LacI family		K	1			EF0653-EF0654	0.197984	0.281565	0.192158	0.302263	1.06062	3.7728e-14	0.595175	0.000343497	0.3465	0.0420437
EF2061	cytochrome d ubiquinol oxidase, subunit I	cydA	C	3	1.10.3.-	K00425	EF2058-EF2061	-0.0908896	0.633188	0.165361	0.363586	-1.02075	1.61319e-08	0.356695	0.00238859	-0.932539	9.09812e-21
EF0011	DHH family protein		T	1			EF0011-EF0013	-0.00257581	0.988552	0.145744	0.401355	1.0342	1.59147e-08	0.104513	0.279581	0.969212	3.65525e-36
EF2442	phosphate transporter family protein		P	2		K03306	EF2441-EF2442	-0.198739	0.0685411	0.105066	0.230233	-1.04551	7.66461e-33	-0.214621	0.0615909	-0.717974	2.74146e-10
EF3065	ribosomal protein S15	rpsO	X	1		K02956	EF3064-EF3065	-0.0938389	0.612534	0.0986047	0.601175	-1.08522	2.40767e-09	0.15887	0.138705	-0.862438	7.46668e-26
EF2079	peptidase, M20/M25/M40 family		R	2			EF2079-EF2082	0.779025	9.51768e-13	0.0948079	0.500713	1.16224	3.72772e-41	-0.0256742	0.818539	0.2229	0.0458056
EF3271	hypothetical protein		X	1			EF3271-EF3273	0.420406	1.56482e-05	0.0882068	0.388247	1.08435	5.15519e-45	-0.368171	0.000234136	0.451856	8.72076e-06
EF1734	conserved hypothetical protein		S	5		K09976	EF1734	-0.383002	4.84903e-05	0.0754939	0.5201	-1.04121	1.37376e-48	0.257031	0.00362334	-0.607138	3.64535e-12
EF0646	NAD-dependent epimerase/dehydratase family protein		M	3		K01784	EF0645-EF0646	-0.00794966	1	0.0645376	0.855322	1.27163	2.91835e-10	0.127663	0.644561	0.899471	1.98738e-05
EF0404	nitroreductase family protein		C	1			EF0403-EF0404	0.37744	0.00213126	0.0516181	0.683619	1.17666	5.18292e-39	-0.167057	0.190555	0.847248	2.06658e-18
EF3064	polyribonucleotide nucleotidyltransferase	pnpA	J	1	2.7.7.8	K00962	EF3064-EF3065	-0.0752216	0.684405	0.047283	0.79575	-1.06035	1.70324e-09	0.176535	0.0747973	-0.875529	9.06711e-30
EF0388	ureidoglycolate dehydrogenase	allD	X	5	1.1.1.154	K00073	EF0388	0.246906	0.149278	0.0448207	0.820451	1.34153	1.4248e-24	-0.191852	0.294843	0.873261	2.32289e-10
EF0932	hypothetical protein		X	5			EF0932	0.827527	4.65158e-08	0.0437868	0.79061	1.76688	1.22494e-48	-0.214277	0.0860459	0.722815	3.44343e-12
EF2768	conserved hypothetical protein		X	2		K16785	EF2767-EF2770	0.424527	0.000360336	0.0433938	0.730234	1.05184	7.65799e-27	-0.468914	0.000288216	0.78044	1.63034e-13
EF1241	hypothetical protein		X	5			EF1241	1.35724	5.71154e-09	0.0209586	1	1.03281	8.88245e-06	-0.0162073	0.970296	-0.617086	0.00206955
EF0191	ferrichrome ABC transporter, ATP-binding protein		PH	2		K02013	EF0191-EF0193	3.31603	8.06201e-38	0	0	3.57243	2.01172e-61	-0.0416292	0.843661	0.124018	0.377323
EF0732	ornithine carbamoyltransferase	argF-2	E	3	2.1.3.3	K13252	EF0732-EF0734	0	0	0	0	1.48889	1.15727e-05	0.938832	0.0151954	0
EF0733	amino acid permease family protein		E	3		K20265	EF0732-EF0734	0.700435	0.0447009	0	0	1.34723	1.1881e-05	-0.401233	0.292052	0.198144	0.538505
EF0776	hypothetical protein		X	5			EF0775-EF0776	0	0	0	0	1.74436	5.83415e-06	0.422335	0.250404	0.482174	0.128092
EF1506	hypothetical protein		X	5			EF1506	0.590657	0.142902	0	0	1.96162	1.47877e-11	-0.705385	0.0866006	0.904539	0.00109758
EF1668	transcriptional regulator, MarR family		K	3		K15973	EF1668-EF1670	0	0	0	0	1.33696	0.000591819	0	0	0
EF1833	hypothetical protein		X	5			EF1833	0	0	0	0	3.66502	1.48934e-13	0	0	0
EF2045	competence protein	comG2	NU	4		K02244	EF2044-EF2046	0	0	0	0	1.22869	0.000121047	0	0	0.476709	0.250524
EF2046	competence protein	comG1	NU	4		K02243	EF2044-EF2046	0.458906	0.210157	0	0	1.80319	2.26921e-10	-0.338773	0.359685	0.650439	0.0296665
EF2574	endoribonuclease L-PSP, putative		J	1		K09022	EF2574	0	0	0	0	1.39853	0.00180851	0	0	0.875435	0.0237042
EF3236	type III leader peptidase family		NOU	4		K02236	EF3236	0	0	0	0	1.05595	0.00397537	0	0	0.754429	0.0203298
EF2899	oxidoreductase, pyridine nucleotide-disulfide family		O	4		K21567	EF2899	0.385035	3.72156e-06	-0.0170055	0.848848	1.00745	1.53754e-53	-0.212444	0.0126342	0.467547	1.03295e-08
EF2623	cadmium-translocating P-type ATPase	cadA	P	2	3.6.3.-		EF2623-EF2624	-7.21326	1.07349e-180	-0.0426472	0.825204	-6.49436	8.42472e-161	-0.184151	0.0704231	0.71631	6.75723e-16
EF2214	glyoxylase family protein		E	3		K08234	EF2214-EF2215	-0.0411701	0.734827	-0.0500106	0.743043	-1.07758	6.49548e-22	-0.974148	1.91716e-08	-0.948942	6.94123e-13
EF3096	chromosome partition protein SMC		D	4		K03529	EF3094-EF3097	0.0268901	0.887768	-0.0509469	0.780532	-1.00702	9.38072e-09	-0.349128	0.00196363	-0.948029	7.44256e-25
EF1543	ferredoxin	fer	C	3		K05337	EF1543	0.316826	0.00529331	-0.053202	0.702775	1.20922	2.74738e-33	-0.33139	0.003978	0.862719	9.51968e-22
EF1400	cadmium-translocating P-type ATPase		P	2		K01534	EF1400	-0.372581	0.0510785	-0.0687866	0.715853	-1.10669	1.86063e-09	-0.0471689	0.638292	-0.525838	2.53866e-11
EF0241	conserved hypothetical protein		X	5			EF0241	0.103059	0.235684	-0.0773687	0.589891	1.0904	1.75844e-51	-0.455508	3.04239e-07	0.840927	7.38761e-27
EF1006	conserved hypothetical protein		X	5			EF1006	0.0924285	0.320725	-0.131358	0.125754	1.17058	4.11102e-41	-0.354994	0.000622143	0.966739	7.77753e-26
EF1401	hypothetical protein		X	5			EF1401	-0.437683	0.000142068	-0.151983	0.202635	-1.05228	1.32405e-28	0.0278377	0.847433	-0.40801	0.000905467
EF1814	drug resistance transporter, EmrB/QacA family protein		X	4			EF1813-EF1814	-0.05968	0.937809	-0.193626	0.744502	1.46363	8.81961e-07	-0.00324077	1	0.950108	0.0013114
EF2507	conserved hypothetical protein		X	5			EF2507	0.187721	0.0324845	-0.202378	0.0190582	1.04683	1.73592e-71	0.118372	0.195539	0.712351	8.7771e-18
EF2426	transcriptional regulator, GntR family		KE	1			EF2426	0.15217	0.077175	-0.241728	0.0285711	1.03328	4.24413e-45	-0.21479	0.0214049	0.812951	1.92287e-25
EF0294	conserved hypothetical protein		H	4			EF0294	-0.42217	0.00165467	-0.270214	0.00605507	-1.04445	1.78317e-27	0.300787	0.0106949	-0.854051	6.0362e-13
EF1542	conserved hypothetical protein		S	5			EF1542	0.434423	2.22199e-07	-0.276955	0.000297256	1.18061	1.52133e-40	-0.442839	3.89508e-08	0.510895	1.01703e-12
EF0188	iron compound ABC transporter, substrate-binding protein		P	2		K02016	EF0188	7.27032	0	-0.309232	0.255261	6.83893	0	-0.575474	1.86422e-15	-0.632764	5.29727e-17
EF2562	flavodoxin		C	3			EF2559-EF2562	-0.147637	0.690916	-0.351815	0.334386	-1.11809	0.00102801	-0.745393	0.0344282	-0.674887	0.0183875
EF0673	membrane protein, putative		G	3			EF0673	0.529046	0.000270056	-0.367994	0.0310627	1.706	1.09734e-47	-0.292488	0.0148758	0.901515	3.20891e-19
EF1369	transcriptional regulator, Cro/CI family		K	1			EF1369	0.621791	0.00151628	-0.373935	0.137702	1.62875	9.93906e-26	0.0844606	0.669103	0.693129	6.09085e-05
EF0193	ferrichrome ABC transporter, permease protein	fhuG	P	2		K02015	EF0191-EF0193	4.39031	6.44364e-190	-0.37493	0.154548	4.9397	0	0.229197	0.0154122	0.518467	1.73553e-08
EF1604	sucrose operon repressor ScrR	scrR-1	K	1		K03484	EF1603-EF1604	-0.0608673	0.529512	-0.37914	0.000170701	1.08952	3.90816e-45	-0.191323	0.0712781	0.867205	1.64043e-25
EF1326	transcriptional regulator, TetR family		K	1			EF1326	0.280537	0.0373835	-0.436879	0.00180944	1.2832	1.56737e-40	-0.164183	0.272444	0.639929	1.48609e-08
EF1040	conserved hypothetical protein		X	5			EF1040	0.181274	0.550698	-0.456825	0.0923597	1.40715	3.90245e-13	-0.137675	0.680687	0.661424	0.00238112
EF0192	ferrichrome ABC transporter, permease protein		P	2		K02015	EF0191-EF0193	4.09053	7.12343e-143	-0.457473	0.0723944	4.44648	0	0.397919	0.000284211	0.283379	0.00928587
EF3145	hypothetical protein		X	5			EF3145	0.0336127	1	-0.472749	0.230507	1.1919	1.06899e-05	0.576657	0.0567374	0.401998	0.159796
EF1772	conserved hypothetical protein		X	3			EF1771-EF1773	0.0682379	0.598021	-0.510398	0.000854114	1.04471	5.65576e-21	-0.533553	0.00128939	0.724688	1.06261e-09
EF2661	diacylglycerol kinase catalytic domain protein		I	3			EF2661	0.0445623	0.737666	-0.531246	0.00587759	1.15176	9.46744e-37	-0.588051	2.82746e-05	0.696632	2.14353e-11
EF3119	conserved hypothetical protein TIGR00157		R	4		K06949	EF3117-EF3123	0.02829	0.724873	-0.574514	4.74227e-12	1.02505	4.64714e-59	-0.455617	6.27214e-08	0.718377	3.38698e-20
EF1518	conserved hypothetical protein		X	5			EF1517-EF1518	0.618177	0.000474478	-0.607427	0.0209796	1.60027	1.08043e-31	-0.425485	0.0177601	0.776519	2.64023e-08
EF1545	ATP-dependent DNA helicase RecQ	recQ-1	L	5	3.6.1.-	K03654	EF1544-EF1546	0.165358	0.0470324	-0.641064	8.46612e-11	1.28067	1.53601e-93	-0.900168	1.55695e-20	0.972466	3.5589e-29
EF0038	glutamate 5-kinase	proB	E	3	2.7.2.11	K00931	EF0037-EF0038	0.0982435	0.40338	-0.759899	4.39552e-07	1.0151	1.21521e-28	-0.158582	0.169046	0.698333	7.03624e-13
EF0645	exfoliative toxin A, putative		P	3		K11041	EF0645-EF0646	-0.029433	1	-0.782049	0.0635733	1.05582	8.14571e-05	-0.488481	0.184964	0.0800955	0.829777
EF1603	sucrose-6-phosphate dehydrogenase	scrB-1	X	1	3.2.1.26	K01193	EF1603-EF1604	0.320917	0.0195117	-0.852647	1.59677e-06	1.36209	1.62418e-37	-0.453022	0.00279186	0.621281	5.34215e-07
EF1643	conserved hypothetical protein TIGR00023		S	5		K08591	EF1643	-0.056849	0.565865	-0.947495	8.04489e-18	1.25094	8.21967e-69	-0.177722	0.102718	0.822111	3.50856e-20
EF1695	acetyltransferase, GNAT family		X	5			EF1695	-0.0748277	0.591499	-0.981025	5.00488e-10	1.11373	9.52172e-39	-0.534736	0.000206711	0.88019	2.75825e-14
EF0085	conserved domain protein		K	5			EF0084-EF0086	0.3797	0.0155175	-0.983491	1.98865e-06	1.95977	3.61036e-62	-0.0450385	0.786343	0.924963	1.71973e-11
EF1660	branched-chain alpha-keto acid dehydrogenase, E1 component, alpha subunit	bkdA	C	3	1.2.4.4	K00166	EF1658-EF1663	0	0	2.42163	6.57991e-08	0	0	0	0	0
EF1232	ABC transporter, permease protein		G	3		K17319	EF1232-EF1240	0.476263	0.000846827	1.95693	3.47585e-43	0.74011	1.89019e-08	0.546739	4.58697e-05	0.504858	0.00065087
EF0057	ABC transporter, permease protein		P	2		K09816	EF0055-EF0057	0.122565	0.382888	1.90541	3.56968e-55	-0.233577	0.059826	0.913075	7.08076e-12	-0.354094	0.00613008
EF0114	glycosyl hydrolase, family 20		G	3	3.2.1.52	K12373	EF0114	0.471725	2.81772e-07	1.53822	1.7574e-88	-0.220591	0.00314166	0.922728	3.15164e-27	-0.378773	1.66719e-05
EF0292	PTS system, IIC component		G	3		K02761	EF0292	0.195158	0.331986	1.49512	1.0353e-11	0.881971	4.34467e-06	0.967955	1.97322e-07	0.6737	0.000351511
EF0056	ABC transporter, ATP-binding protein		P	2		K09817	EF0055-EF0057	0.227366	0.0897374	1.4951	3.35832e-36	-0.650178	2.70466e-08	0.224177	0.111542	-0.792252	6.53377e-09
EF2960	ribose transporter protein RbsD		G	3		K06726	EF2959-EF2962	0.232146	0.021033	1.31564	5.13747e-41	0.0483708	0.578527	0.37701	1.26736e-06	0.372911	3.80478e-07
EF2560	glutamate synthase (NADPH), homotetrameric	gltA	ER	3	1.4.1.13	K00266	EF2559-EF2562	0.467531	0.0585667	1.282	3.48872e-09	0.277648	0.259886	0.799349	0.000218836	-0.0832445	0.692273
EF1829	PTS system, IID component		X	5			EF1829-EF1830	0	0	1.2304	0.000337079	0	0	0.852217	0.0147425	0.149714	0.695641
EF3142	6-phosphogluconate dehydrogenase family protein		G	3		K00033	EF3134-EF3142	0.11189	0.250422	1.22041	3.15456e-62	0.436294	1.74724e-09	0.147964	0.10981	0.886415	6.07442e-24
EF0831	conserved hypothetical protein		X	5			EF0831	-0.328663	0.137209	1.20917	4.76757e-11	-0.462922	0.0333197	0.898621	1.41786e-05	0.0317369	0.914881
EF1836	PTS system, IIA component, putative		GT	3		K20112	EF1836-EF1838	0.618411	0.0373183	1.19985	7.73701e-05	0.815514	0.000783643	0.186343	0.512276	0.0300449	0.927869
EF3307	PTS system, sorbitol-specific IIC component		X	4	2.7.1.69	K02783	EF3304-EF3310	0.524943	0.0727747	1.15731	8.73573e-06	0.718349	0.00366004	0.57557	0.0288388	-0.244618	0.343983
EF1830	PTS system, IIC component		X	5	2.7.1.69	K02795	EF1829-EF1830	-0.165735	0.67476	1.12511	0.000289632	0.629436	0.0535765	0.940243	0.00836676	0.869131	0.00422201
EF0186	purine nucleoside phosphorylase	deoD-1	F	3	2.4.2.1	K03783	EF0185-EF0187	0.18392	0.312685	1.09407	6.78219e-09	-0.119532	0.492825	0.9929	1.92746e-22	-0.0460748	0.545149
EF0830	conserved hypothetical protein		X	5			EF0830	-0.188712	0.335104	1.06962	2.26789e-08	-0.329562	0.127805	0.628811	0.000178049	0.296652	0.0786056
EF1834	galactose-6-phosphate isomerase, LacB subunit	lacB	G	3	5.3.1.26	K01819	EF1834-EF1835	0.147536	0.48616	1.05788	9.12531e-08	-0.0572621	0.848148	0.421704	0.056476	0.0303298	0.890785
EF3036	thioredoxin family protein		OC	4			EF3036-EF3037	-0.108273	0.533757	1.04562	1.29404e-08	-0.173511	0.295341	0.800814	9.36669e-16	0.228103	0.0040948
EF0071	lipoprotein, putative		G	3		K03931	EF0071	0.304288	0.00140086	1.03482	1.21881e-24	-0.780424	6.5966e-28	0.787059	1.98612e-16	-0.257652	0.00621978
EF1982	universal stress protein family		T	2			EF1981-EF1982	-0.0399914	0.699494	1.01668	4.03457e-09	-0.00216589	0.983942	0.878562	6.45762e-17	0.386975	5.25383e-05
EF3031	PTS system, IIB component		X	3	2.7.1.69	K19507	EF3029-EF3034	0.269354	0.0317588	1.01129	2.83771e-13	0.405585	0.000462375	0.27351	0.037473	0.801866	1.50229e-13
EF3211	PTS system, IIB component		X	5	2.7.1.69	K02794	EF3210-EF3213	0.251167	0.145911	0.996096	1.4572e-08	-0.218653	0.168256	0.913666	5.44628e-19	0.177271	0.0403844
EF2891	glycosyl transferase, group 1 family protein		M	4		K13677	EF2890-EF2891	0.292883	0.00335019	-1.0104	4.05892e-14	0.151776	0.0826732	-0.736915	4.04916e-13	-0.524609	5.83629e-08
EF0415	conserved hypothetical protein		MG	5			EF0415	-0.323768	0.179246	-1.01737	0.000212391	-0.518931	0.0208051	-0.493652	0.0880949	-0.290827	0.18224
EF0850	transcriptional regulator, PemK family		T	3		K07171	EF0848-EF0850	0.0582151	0.778626	-1.019	8.58671e-06	-0.400081	0.0292125	-0.885435	0.000277727	-0.694964	1.28532e-05
EF2365	xanthine phosphoribosyltransferase	xpt	F	3	2.4.2.-	K03816	EF2364-EF2365	0.435196	3.81009e-05	-1.04774	2.56475e-27	0.270301	0.000371154	-0.773544	9.06521e-12	-0.330754	0.00149859
EF1925	hypothetical protein		X	5			EF1925-EF1926	-0.104635	0.39371	-1.04966	9.38504e-13	-0.131562	0.181749	-0.568715	0.00015548	-0.433379	0.000446218
EF1768	ABC transporter, ATP-binding protein		R	5			EF1768	-0.189169	0.447254	-1.06871	0.000308347	-0.087192	0.722593	-0.176217	0.570656	-0.315574	0.19944
EF2693	conserved hypothetical protein		L	1		K07461	EF2692-EF2693	0.468645	0.0502362	-1.08328	0.000697127	0.810634	0.000793499	-0.277716	0.229478	0.0477636	0.846393
EF1839	lactose phosphotransferase system repressor LacR	lacR	KG	1		K02530	EF1839	0.0401097	0.895543	-1.11938	1.93102e-05	0.785999	4.68224e-05	-0.414347	0.118023	0.0623912	0.758608
EF2664	phosphoglycerate mutase family protein		G	1		K15634	EF2663-EF2664	-0.281161	0.00918918	-1.15304	2.05421e-12	0.753428	2.61701e-20	-0.670297	9.39761e-08	0.788923	2.00655e-15
EF2681	hydrolase, haloacid dehalogenase-like family		R	5		K07025	EF2681	0.175944	0.384399	-1.15828	7.16229e-06	0.635285	0.000570091	-0.104192	0.681418	-0.142544	0.45918
EF1095	hypothetical protein		X	5			EF1095	0.00392214	1	-1.18915	2.74654e-17	0.912518	1.55414e-31	-0.941565	1.13361e-09	0.640327	2.93117e-07
EF1675	ABC transporter, ATP-binding protein		V	4		K01990	EF1674-EF1676	-0.223469	0.164834	-1.20912	7.05709e-10	-0.246508	0.158876	-0.564671	0.00466459	0.0312788	0.871724
EF1601	PTS system, IIABC components		G	3	2.7.1.69	K02808	EF1601-EF1602	-0.515693	0.00306803	-1.25232	1.66224e-10	0.725403	1.61639e-08	0.599186	0.00161071	0.805766	1.25267e-07
EF2548	conserved hypothetical protein		X	5			EF2548	-0.131845	0.136563	-1.26336	1.72208e-33	0.0844875	0.241	0.161219	0.0919452	0.136762	0.12016
EF0705	conserved hypothetical protein		X	5			EF0705	-0.0698825	0.418783	-1.27307	2.86079e-31	0.910264	1.88283e-48	-0.729934	2.09868e-14	0.695819	1.82624e-16
EF1652	DNA processing protein DprA, putative		LU	1		K04096	EF1652-EF1654	-0.525936	0.119803	-1.517	0.000278713	-0.168368	0.593019	0	0	-0.13118	0.776467
EF1726	cold-shock domain family protein		X	5		K03704	EF1726	-0.0166823	0.879845	0.985731	2.07633e-24	-0.166064	0.078139	0.98284	1.67025e-22	0.0536586	0.647392
EF1393	molybdopterin cofactor biosynthesis protein A, putative		H	2		K03639	EF1386-EF1399	0.619698	0.0056159	0.981071	1.70928e-05	-0.0323236	0.86802	0.570499	0.00280525	0.247734	0.139161
EF1368	conserved hypothetical protein		X	5			EF1368	0.19248	0.106362	0.968243	2.52318e-08	0.231254	0.0255653	0.285724	0.00282373	0.107467	0.178238
EF0938	ABC transporter, ATP-binding/TOBE domain protein		G	3		K10112	EF0938	0.181069	0.0620536	0.965137	7.78097e-28	0.457504	1.49916e-08	0.970897	1.37215e-38	0.713367	6.77064e-22
EF3303	conserved hypothetical protein		S	5		K10254	EF3303	0.0580672	0.74171	0.96192	1.21844e-07	0.564736	0.00124577	0.364945	0.000154934	0.816714	1.69705e-26
EF1076	streptomycin 3-adenylyltransferase, putative		X	5		K00984	EF1075-EF1077	-0.0278301	0.797034	0.939602	1.9967e-17	0.0962638	0.238377	-0.068222	0.597032	0.187137	0.0662525
EF1307	heat shock protein GrpE	grpE	O	4		K03687	EF1305-EF1308	0.0937276	0.363928	0.933517	5.9029e-23	-0.201898	0.0163844	0.284176	0.000314223	-0.0771128	0.304966
EF2436	glucokinase regulator-related protein		R	3		K07106	EF2434-EF2437	0.152773	0.331042	0.921063	3.81778e-08	-0.133604	0.414231	0.746882	2.94674e-07	-0.0682098	0.69993
EF0829	conserved hypothetical protein		X	5			EF0829	0.00114629	1	0.90863	5.77113e-06	-0.324149	0.122798	0.161472	0.416881	0.0201679	0.928653
EF0677	phosphoglucomutase/phosphomannomutase family protein		G	3		K01840	EF0677	-0.166224	0.0895681	0.907517	4.54682e-34	-0.245643	0.000112191	0.591904	6.19557e-10	0.194445	0.0352253
EF2720	ABC transporter, ATP-binding protein		R	5		K19350	EF2720	-0.248469	0.0126766	0.90586	4.82597e-08	0.102973	0.221165	0.460995	9.32171e-10	0.644633	2.78474e-19
EF0076	oxidoreductase, short chain dehydrogenase/reductase family		IQR	5			EF0076-EF0079	-0.119235	0.53018	0.900862	1.30494e-06	0.531924	0.00301185	0.166232	0.114304	0.767766	5.33435e-21
EF1308	dnak protein	dnaK	O	4		K04043	EF1305-EF1308	-0.17201	0.38082	0.898473	2.09822e-06	0.662786	0.000425208	0.855861	4.21782e-12	0.80546	2.21859e-13
EF0115	endoribonuclease L-PSP, putative		J	1			EF0115	-0.192328	0.0756277	0.893524	4.21277e-24	-0.852461	6.30722e-23	0.717592	5.96333e-12	-0.532548	7.75474e-06
EF3037	glutamyl-aminopeptidase	pepA	G	4	3.4.11.7	K01261	EF3036-EF3037	-0.162733	0.373384	0.87863	1.8533e-06	-0.306479	0.0825678	0.65462	1.84822e-09	0.113577	0.178325
EF3027	serine protease DO	htrA	O	4	3.4.21.-	K04771	EF3027	0.0273692	0.870067	0.876058	3.54816e-07	0.302457	0.0623443	0.246718	0.00821379	0.147608	0.0512295
EF0940	conserved hypothetical protein		X	5			EF0940	0.119186	0.35733	0.872673	5.2009e-18	-0.751215	1.74215e-13	0.982389	2.96074e-19	-0.778027	2.7863e-10
EF1708	conserved hypothetical protein		X	3		K09704	EF1707-EF1708	0.239683	0.0189589	0.86726	3.73231e-18	-0.00160125	1	0.427617	0.000720289	0.174235	0.0730984
EF1732	ABC transporter, ATP-binding/permease protein, MDR family		V	4		K18890	EF1732-EF1733	0.368409	1.48563e-06	0.865659	2.06574e-31	-0.610348	3.33536e-19	0.527266	2.74535e-12	-0.837558	2.98303e-30
EF1084	universal stress protein family		T	5			EF1082-EF1084	0.247199	0.0126596	0.864041	1.40929e-16	0.0238811	0.784656	0.525618	1.34206e-12	0.151042	0.0411024
EF2570	aldehyde oxidoreductase, putative		C	3			EF2563-EF2572	0.16192	0.0580537	0.859709	2.11058e-22	-0.349966	5.84961e-06	0.6936	5.10178e-13	-0.127442	0.142791
EF1825	conserved domain protein		X	5			EF1825	-0.200791	0.0996031	0.858809	1.15271e-21	0.0446503	0.640895	0.57416	6.06003e-08	0.361342	0.00197912
EF1707	glycosyl hydrolase, family 38		G	3		K01191	EF1707-EF1708	0.247564	0.00753764	0.857446	1.08407e-24	0.135258	0.0610458	0.52143	2.09878e-08	0.0111173	0.91477
EF0768	conserved hypothetical protein		S	5		K09762	EF0766-EF0768	-0.0179766	0.873079	0.849649	1.07391e-20	0.482105	1.53183e-08	0.931549	2.02031e-28	0.465474	3.35241e-08
EF1191	DegV family protein		S	5			EF1190-EF1191	0.535591	3.31161e-08	0.848064	2.12661e-21	0.381485	3.83874e-06	0.319908	3.28583e-06	-0.0462392	0.497406
EF0439	immunity protein PlnM, putative		X	5			EF0439	-0.208666	0.145253	0.842572	2.19256e-10	-0.148541	0.292681	0.649541	1.63019e-05	0.354623	0.00765223
EF1082	hypothetical protein		X	5			EF1082-EF1084	0.173409	0.0252598	0.833055	6.53378e-25	-0.212337	0.000767462	0.210402	0.0198683	-0.0105187	0.899659
EF1085	conserved domain protein		X	5			EF1085	0.191359	0.0122966	0.831784	4.96732e-31	0.00395403	0.955707	0.841797	1.17387e-26	0.0738247	0.323739
EF0718	1-phosphofructokinase	fruK-2	G	3	2.7.1.56	K00882	EF0717-EF0719	-0.163621	0.0282189	0.831108	2.16758e-18	-0.521721	5.62518e-15	0.182663	0.0390669	-0.0459726	0.537964
EF3308	transcriptional regulator SrlR	srlR	K	4			EF3304-EF3310	0.281722	0.362339	0.824786	0.00817453	-0.20876	0.495646	0.3365	0.260551	-0.417386	0.214623
EF2999	allantoinase, putative		F	3		K01466	EF2999	-0.0583224	0.855356	0.824594	0.00107139	0.528929	0.0316175	0.861488	0.000279551	0.514231	0.0519927
EF3012	membrane protein, putative		X	5			EF3009-EF3012	0.689572	0.0114302	0.813099	0.0112647	0.721398	0.00840666	-0.12921	0.687176	0.0705243	0.837518
EF1672	permease protein, putative		V	4		K02004	EF1672-EF1673	-0.151449	0.155254	0.809913	3.24459e-14	0.112237	0.260985	0.0318881	0.781043	0.547079	3.2543e-09
EF2417	transcriptional regulator, Fur family		P	2		K02076	EF2417	0.451284	0.000683439	0.808108	4.4068e-12	0.408764	2.17687e-05	-0.455253	0.000505421	-0.681741	3.82184e-07
EF1733	ABC transporter, ATP-binding/permease protein, MDR family		V	4		K18889	EF1732-EF1733	0.351722	2.54806e-06	0.798229	5.76814e-32	-0.801669	2.15813e-41	0.369603	1.54e-05	-0.815739	3.02047e-24
EF3301	hypothetical protein		X	5			EF3301	-0.126669	0.265245	0.797429	1.40941e-06	-0.467342	1.89054e-07	0.454782	2.39575e-07	-0.270523	0.00217837
EF3194	LrgA family protein		R	1		K05338	EF3193-EF3197	-0.402816	4.33586e-05	0.795442	1.37407e-18	0.109052	0.191338	0.904635	1.78734e-35	0.422916	2.69413e-09
EF0185	phosphopentomutase	deoB	G	3	5.4.2.7	K01839	EF0185-EF0187	0.142478	0.456711	0.790966	5.20064e-05	-0.39102	0.0328346	0.694193	2.19279e-11	-0.281001	0.000329329
EF1751	membrane protein, putative		S	5		K08972	EF1751-EF1752	-0.089699	0.366482	0.789024	7.45624e-15	-0.0147336	0.828251	0.621216	1.09629e-11	-0.0340468	0.727652
EF1129	hexulose-6-phosphate synthase, putative		G	3		K03078	EF1125-EF1131	0.394127	0.289835	0.782455	0.0421758	0.453271	0.212255	-0.14456	0.719087	-0.121884	0.737642
EF0041	PIN domain protein		R	1			EF0039-EF0049	0.0299815	0.76872	0.77726	1.87378e-17	-0.0574223	0.50493	0.715313	2.71945e-22	-0.00247044	0.975113
EF3322	citrate lyase ligase	citC	C	3	6.2.1.22	K01910	EF3317-EF3326	0.289395	0.00729112	0.775573	2.98596e-13	0.194662	0.0359754	0.940012	5.69169e-15	-0.153159	0.141929
EF1157	peptidase, M20/M25/M40 family		E	3			EF1156-EF1157	0.0839703	0.292269	0.758459	4.73115e-24	0.412247	4.75768e-11	0.557996	5.40267e-12	0.393427	2.03315e-07
EF0767	conserved hypothetical protein		X	5			EF0766-EF0768	0.0628648	0.517996	0.757687	2.08974e-17	0.210005	0.0108722	0.548568	1.82162e-14	0.288437	6.34854e-05
EF0091	conserved hypothetical protein		K	1			EF0091	0.178619	0.274639	0.757661	7.12442e-06	0.338548	0.0343734	0.310564	0.00115332	0.178276	0.0234321
EF1764	ribosomal subunit interface protein	yfiA	J	1			EF1764	-0.194446	0.304522	0.751441	7.50012e-05	-0.133166	0.47468	0.929157	1.8772e-17	0.197371	0.0381258
EF0026	conserved hypothetical protein		X	5			EF0026	0.105921	0.338362	0.748395	3.41034e-13	0.0488836	0.603089	-0.0212375	0.862163	0.0912822	0.443783
EF1789	SPFH domain/Band 7 family protein		O	4			EF1789	-0.0926255	0.339938	0.738224	6.15968e-17	-0.404697	1.9964e-06	0.131578	0.0563104	-0.121811	0.0849294
EF2656	phosphopantothenoylcysteine decarboxylase		H	4	4.1.1.36	K01598	EF2654-EF2657	0.144299	0.0546245	0.738159	1.61454e-28	0.254899	1.54523e-05	0.400084	2.7453e-06	0.163361	0.0449685
EF2863	endo-beta-N-acetylglucosaminidase		X	5	3.2.1.96		EF2863	0.282558	0.0671861	0.736738	2.03708e-06	0.365111	0.0103655	0.194886	0.229205	0.352228	0.00212365
EF1412	conserved domain protein		X	5			EF1412	-0.171984	0.158904	0.731397	3.04147e-10	-0.507537	9.83637e-06	-0.0861991	0.51329	-0.402708	0.00114895
EF1210	response regulator		KT	2		K02475	EF1209-EF1210	-0.134938	0.55364	0.730234	0.000194299	0.0195266	0.905965	0.624348	0.00728417	0.274953	0.293387
EF2637	abortive infection protein		X	5		K07052	EF2636-EF2637	-0.0216421	0.797609	0.729383	8.37219e-20	0.553682	5.49085e-16	0.818821	7.60546e-19	0.525503	7.70521e-08
EF1824	glycosyl hydrolase, family 31/fibronectin type III domain protein		L	1			EF1824	0.157326	0.327526	0.725935	1.04947e-05	0.228293	0.131292	0.471338	0.00185294	0.30865	0.0320464
EF0663	conserved hypothetical protein TIGR01033		X	5			EF0662-EF0663	-0.227197	0.177876	0.723608	8.09325e-11	-0.0434563	0.648121	0.930998	7.51588e-10	0.237847	0.114662
EF1083	hypothetical protein		X	5			EF1082-EF1084	0.120306	0.127518	0.71343	7.09837e-13	-0.195523	0.00103335	0.269568	0.0013283	0.0455804	0.550812
EF1526	glyceraldehyde 3-phosphate dehydrogenase	gap-1	G	3	1.2.1.12	K00134	EF1526	-0.155804	0.404804	0.711109	0.000181308	0.248228	0.180953	0.474686	5.69755e-06	0.459341	3.51455e-08
EF2445	2-dehydropantoate 2-reductase, putative		H	4		K00077	EF2445	0.0120918	0.919531	0.70933	1.9123e-05	-0.927112	2.95505e-30	0.208879	0.0247019	-0.923179	5.95276e-27
EF1247	conserved hypothetical protein		X	5			EF1247	0.125787	0.206024	0.707697	1.72656e-19	-0.54193	5.24105e-13	-0.260082	0.00646858	-0.84736	1.27927e-17
EF2657	membrane protein, putative		S	4			EF2654-EF2657	-0.0511623	0.554682	0.706467	1.29031e-20	0.270909	1.86169e-05	0.860306	1.51909e-20	0.360025	3.52497e-05
EF0426	gluconate 5-dehydrogenase, putative		IQR	3		K00046	EF0423-EF0426	-0.0894795	0.644279	0.703798	7.66677e-05	0.0239179	0.970929	0.800585	5.4379e-05	0.281816	0.0973556
EF0707	hypothetical protein		X	5			EF0707	0.0196157	1	0.696854	0.00319786	-0.871094	0.000795721	0.413973	0.0864839	-0.495847	0.0332779
EF1306	heat-inducible transcription repressor HrcA	hrcA	K	4		K03705	EF1305-EF1308	-0.0491724	0.776393	0.695049	5.42612e-05	-0.542528	2.93956e-07	0.172684	0.0971645	-0.310893	0.0010435
EF0281	hypothetical protein		X	2			EF0280-EF0281	0.143131	0.11523	0.693467	1.23439e-14	-0.0293677	0.712658	0.50821	2.41357e-07	-0.270511	0.00351056
EF3321	citrate lyase, gamma subunit	citD	C	3	4.1.3.6	K01646	EF3317-EF3326	0.345132	0.0216294	0.691118	9.26393e-06	0.143219	0.330263	0.957209	4.33741e-12	-0.204719	0.119767
EF2633	chaperonin, 60 kDa	groEL	O	4		K04077	EF2633-EF2634	-0.0107258	0.951779	0.690832	0.000149059	-0.719778	1.85552e-05	0.200761	0.0446996	-0.672942	2.25002e-18
EF1656	transcriptional regulator, LysR family		K	1			EF1656	0.105993	0.439691	0.689795	3.52625e-06	0.177861	0.152166	0.0719172	0.656066	0.167203	0.188255
EF0927	sensor histidine kinase		T	2	2.7.3.-		EF0926-EF0927	0.185876	0.0157067	0.688304	6.48317e-23	0.364489	5.27913e-10	0.781457	1.15817e-25	0.0386256	0.60069
EF1077	acetyltransferase, GNAT family		X	5			EF1075-EF1077	0.107564	0.579882	0.685496	1.58748e-05	0.202526	0.173649	-0.327235	0.0887972	0.30436	0.0682681
EF2211	conserved hypothetical protein TIGR01655		X	5			EF2211	-0.466578	5.74781e-05	0.684604	2.8679e-13	-0.854823	2.35175e-41	0.160059	0.169358	-0.208453	0.0631252
EF0820	ribosomal protein L25	rplY	J	1		K02897	EF0820	-0.151359	0.43348	0.679428	0.000494402	-0.189985	0.316276	0.730119	2.88995e-11	0.138264	0.138322
EF2209	hypothetical protein		X	5			EF2209	-0.556419	0.000135037	0.673729	0.000630078	-0.218074	0.154535	0.65019	3.02716e-06	0.0688908	0.599265
EF1357	transcriptional regulator, AraC family		T	2			EF1357	0.220783	0.0135155	0.670501	5.68723e-14	0.723824	1.87618e-24	0.217626	0.0385977	0.66133	1.19362e-14
EF2441	conserved hypothetical protein		P	2		K07220	EF2441-EF2442	-0.230112	0.0789163	0.668309	0.00024031	-0.856208	1.43531e-13	0.461203	0.0107179	-0.363786	0.00405981
EF1918	conserved hypothetical protein		G	3		K07404	EF1918	-0.0596001	0.591839	0.66533	5.5837e-13	0.0195976	0.828858	0.413157	1.57603e-06	0.345653	2.92237e-05
EF1405	thioredoxin	trx	OC	4		K03671	EF1402-EF1406	-0.138538	0.188049	0.664181	5.52085e-11	-0.193849	0.0390581	0.710909	7.08265e-15	-0.146925	0.0972239
EF1018	PTS system, IIA component		X	3	2.7.1.69	K02759	EF1017-EF1018	-0.00455392	0.979772	0.663499	0.000299444	-0.57837	0.000595701	0.590968	2.28047e-08	-0.151943	0.0807964
EF2996	conserved hypothetical protein		R	3		K14977	EF2996-EF2997	0.23597	0.198528	0.662799	9.93556e-05	0.859512	4.71899e-10	-0.152196	0.376325	0.776485	2.4248e-08
EF1710	transcriptional regulator, LysR family		K	1			EF1710-EF1711	-0.0332953	0.840549	0.658672	0.000125263	-0.602968	3.29336e-14	-0.0749345	0.380347	-0.567289	9.11387e-16
EF3305	PTS system, sorbitol-specific IIA component		X	4		K02781	EF3304-EF3310	0.126799	0.597893	0.656589	0.00423081	0.37246	0.0659975	0.263265	0.24087	0.280023	0.172382
EF2208	phenazine biosynthesis protein PhzF family		R	5			EF2208	0.100321	0.236648	0.654152	3.48994e-15	-0.395047	2.86244e-08	0.578155	1.35235e-09	-0.296039	0.000765835
EF0469	conserved domain protein		R	5		K06872	EF0468-EF0469	-0.13957	0.192248	0.647532	2.08892e-10	0.193587	0.0269786	-0.0298525	0.752674	0.850726	5.99951e-29
EF2602	conserved hypothetical protein		R	5			EF2602-EF2603	-0.0204919	0.852873	0.643562	1.345e-12	0.290368	0.000501238	0.709562	2.60659e-17	0.274143	0.00143406
EF1584	cysteine synthase A	cysK	E	3	4.2.99.8	K01738	EF1584	0.148004	0.124494	0.641046	8.08643e-12	-0.214608	0.0099119	0.15635	0.0314015	-0.147099	0.0430057
EF1752	conserved hypothetical protein		KT	5			EF1751-EF1752	-0.00820592	0.926735	0.639715	1.41417e-11	-0.194551	0.00142522	0.173524	0.0768644	-0.21699	0.012837
EF3309	putative transcriptional activator SrlM	srlM	GT	4		K03491	EF3304-EF3310	0.585192	0.0146832	0.639177	0.00492625	0.370621	0.0713825	0.215916	0.299326	-0.319051	0.126645
EF0044	serine O-acetyltransferase	cysE	E	1	2.3.1.30	K00640	EF0039-EF0049	-0.350976	0.000805304	0.636184	7.7937e-11	-0.822721	4.29291e-20	0.507912	6.49855e-11	-0.220592	0.00458644
EF0362	chitin binding protein, putative		S	5		K21713	EF0362	0.258462	0.0555169	0.635456	3.09408e-06	0.536004	1.07069e-05	-0.0268561	0.891757	0.312363	0.0118152
EF0946	conserved hypothetical protein		S	5			EF0946-EF0947	0.0103922	0.916315	0.634569	2.34745e-19	0.0272434	0.662792	0.552289	4.87594e-09	0.0826239	0.386828
EF3210	PTS system, IIA component, putative		G	5		K02793	EF3210-EF3213	0.210606	0.0362592	0.634071	5.89931e-12	-0.60459	1.99164e-12	0.66871	9.23709e-14	-0.39972	3.96445e-07
EF1348	glucan 1,6-alpha-glucosidase, putative		X	5		K01215	EF1346-EF1349	-0.021939	0.89618	0.630624	4.5302e-07	-0.322557	0.0116266	0.546048	0.000152308	-0.246384	0.0914731
EF1125	conserved hypothetical protein		R	3		K03476	EF1125-EF1131	0.342801	0.249807	0.629149	0.0390634	0.553217	0.0316505	-0.291864	0.381597	0.174888	0.537552
EF0460	conserved hypothetical protein		V	5			EF0455-EF0461	-0.0538843	0.615212	0.626615	7.38909e-09	0.218881	0.0160102	0.533461	4.8702e-07	0.503155	8.36197e-08
EF1591	transcriptional regulator, AraC family		X	5			EF1591	0.0348421	0.637334	0.620707	2.01514e-18	-0.0624218	0.313045	0.0579554	0.484649	-0.0483011	0.531605
EF1626	ethanolamine utilization protein EutL	eutL	X	3		K04026	EF1623-EF1627	0.744235	0.021192	0.618435	0.100692	0.263262	0.431258	-0.205029	0.575506	-0.279782	0.313102
EF2927	hydrolase, haloacid dehalogenase-like family		R	4			EF2927-EF2928	-0.0390051	0.699488	0.617781	9.83768e-12	-0.130301	0.13429	0.441624	1.94031e-09	-0.0784392	0.274284
EF2725	pheromone binding protein		E	3		K15580	EF2723-EF2725	0.315414	0.0441717	0.613421	0.000851198	0.0610037	0.710635	-0.320169	0.04272	-0.331912	0.0209427
EF3188	conserved hypothetical protein		X	5			EF3184-EF3188	-0.0556492	0.570119	0.61276	1.07017e-11	0.184694	0.0244276	0.429312	3.25334e-09	0.243441	0.00174672
EF3003	lipoprotein, putative		X	5			EF3003	0.159487	0.208074	0.612598	2.06004e-06	0.519007	2.38626e-06	0.192282	0.175079	0.230133	0.0464772
EF1179	fructokinase	cscK	KG	3	2.7.1.4	K00847	EF1179	0.0730844	0.414165	0.611452	3.57134e-14	-0.136899	0.071701	0.7708	5.91459e-22	0.210187	0.0116733
EF0203	cyclopropane-fatty-acyl-phospholipid synthase	cfa	M	4	2.1.1.79	K00574	EF0203	-0.0726971	0.675673	0.610319	0.000405406	-0.155278	0.334694	0.703131	4.46391e-12	0.0766175	0.350165
EF2655	phosphopantothenate--cysteine ligase		H	4	6.3.2.5	K21977	EF2654-EF2657	0.0920099	0.258608	0.609768	7.88766e-11	0.0259594	0.680033	0.125787	0.110898	0.0509811	0.543754
EF0638	conserved hypothetical protein		X	5			EF0638	-0.118945	0.219899	0.606922	9.26696e-11	0.615649	6.01531e-16	-0.330813	0.00451404	0.876983	3.64748e-19
EF1515	transcription antiterminator, bglG family		K	1		K03488	EF1515-EF1516	0.0930181	0.531499	0.602815	6.97934e-06	0.332524	0.0011356	-0.260252	0.119417	-0.0534546	0.689993
EF1190	conserved hypothetical protein		X	5			EF1190-EF1191	0.189712	0.0145405	0.601696	1.44034e-10	-0.112784	0.0398138	0.199294	0.00803135	-0.109468	0.145668
EF1529	PTS system, IIC component, putative		G	3		K02761	EF1528-EF1529	-0.0710311	0.548725	0.598708	2.6665e-07	0.434004	6.11422e-07	0.500084	0.000220159	0.490359	5.14463e-06
EF0766	conserved hypothetical protein		R	5		K06958	EF0766-EF0768	0.0243844	0.80948	0.597792	3.90177e-11	-0.0281855	0.729969	0.524975	6.62544e-12	0.0807349	0.295732
EF1214	alpha-acetolactate decarboxylase	budA	Q	4	4.1.1.5	K01575	EF1213-EF1214	0.0697361	0.487273	0.590648	7.27019e-11	0.194588	0.0217634	0.172927	0.02375	0.197245	0.00472296
EF0170	conserved hypothetical protein		J	1		K00564	EF0170	-0.118371	0.233363	0.590122	1.57281e-10	-0.000115215	1	0.0128748	0.863322	0.216826	0.0022057
EF1180	conserved hypothetical protein		X	5			EF1180	0.053314	0.763888	0.588917	0.000849405	0.372598	0.0335436	0.426279	1.04143e-05	0.602997	8.83033e-15
EF1123	conserved hypothetical protein		R	3		K07095	EF1121-EF1123	-0.139441	0.160145	0.588308	6.93876e-11	0.270434	0.00109344	0.56415	1.66703e-14	0.644583	7.67688e-16
EF0731	transcriptional regulator, luxR family		K	1			EF0731	-0.117001	0.437829	0.583867	7.71078e-06	-0.5795	1.03737e-05	0.714262	3.47873e-06	-0.113947	0.470542
EF1904	glycerophosphoryl diester phosphodiesterase family protein		C	3		K01126	EF1904	0.108064	0.249847	0.580627	8.88824e-16	0.585737	6.9772e-21	0.819987	7.48471e-19	0.365286	5.15642e-05
EF0046	conserved hypothetical protein		S	1		K11145	EF0039-EF0049	-0.172214	0.0284094	0.578919	9.80106e-10	-0.971148	2.37083e-52	0.484867	3.74521e-10	-0.585576	1.52934e-14
EF1804	PTS system, IIB component		X	3	2.7.1.69	K02794	EF1801-EF1805	-0.500294	0.16087	0.578784	0.0724681	-0.290195	0.418782	0.747909	0.0229139	0.122592	0.769538
EF1753	conserved hypothetical protein		S	5			EF1753	0.0896485	0.614411	0.574082	0.000801511	-0.172266	0.28215	-0.445222	3.95021e-05	-0.0192404	0.842433
EF1311	conserved hypothetical protein		X	5		K07313	EF1311	-0.0373518	0.658782	0.572943	8.10933e-16	-0.114176	0.0802001	-0.1202	0.24412	0.087753	0.267374
EF3306	PTS system, sorbitol-specific IIBC components		X	4	2.7.1.69	K02782	EF3304-EF3310	0.0537973	0.771508	0.572753	0.00264896	0.345147	0.0467071	0.101293	0.572338	0.144646	0.350465
EF0295	V-type ATPase, subunit J		P	2	3.6.3.14	K03498	EF0295-EF0296	-0.14612	0.129685	0.571499	1.24201e-17	-0.150905	0.0158282	0.939595	3.2155e-23	0.000275452	0.999709
EF1068	aldose 1-epimerase	galM	G	3	5.1.3.3	K01785	EF1068	0.563328	2.75395e-05	0.568959	0.000133823	0.887014	7.26129e-16	0.443494	0.000560001	0.31128	0.00779123
EF1528	hypothetical protein		X	3			EF1528-EF1529	0.2852	0.0804124	0.568574	0.0017204	0.0612204	0.720968	-0.533269	0.00333525	-0.228011	0.126706
EF3278	conserved hypothetical protein		TQ	5			EF3278-EF3280	0.0633812	0.569127	0.568531	0.000480256	0.132113	0.173836	-0.0481154	0.570226	0.0160455	0.832444
EF1947	hypothetical protein		X	5			EF1946-EF1947	-0.29211	0.0398172	0.564579	2.57947e-07	0.054589	0.593511	0.393226	0.00559659	0.219644	0.0757127
EF0816	PTS system, IIC component		X	5		K02795	EF0816-EF0817	-0.649324	0.0707946	0.563189	0.10037	-0.694926	0.0408021	0.796822	0.0135054	4.11953e-05	1
EF0095	lipoprotein, putative		X	5			EF0095	0.0263642	0.739821	0.562676	2.79036e-16	-0.019128	0.751664	-0.194372	0.0293078	0.292643	0.000171744
EF1671	oxidoreductase, zinc-binding		CR	3			EF1671	-0.172778	0.327234	0.562104	0.00136359	-0.426345	0.00992728	-0.062547	0.516447	-0.092845	0.238289
EF2682	conserved hypothetical protein		X	5			EF2682	0	0	0.561645	0.160567	0.843861	0.00926054	0.575782	0.097718	-0.311378	0.386762
EF0020	PTS system, mannose-specific IIAB components		G	5		K02793	EF0020-EF0024	0.172614	0.350345	0.561482	0.00239671	-0.928255	2.38742e-07	0.438785	3.95702e-05	-0.513338	9.45459e-11
EF2210	conserved hypothetical protein		X	5		K06973	EF2210	-0.184023	0.0413571	0.56138	9.9947e-16	0.246945	4.50036e-05	0.352147	0.000149745	0.258375	0.00723616
EF0637	hypothetical protein		X	5			EF0637	-0.102877	0.571312	0.558129	0.00385493	-0.438284	0.0156606	0.116028	0.262566	-0.0571625	0.464769
EF2082	ABC transporter, ATP-binding protein		P	2		K02071	EF2079-EF2082	1.22751	6.49608e-08	0.549318	0.0569056	0.254828	0.36857	-0.34982	0.076753	-0.915363	1.09429e-06
EF0828	conserved hypothetical protein		K	1			EF0828	-0.124268	0.325916	0.546053	9.62358e-07	-0.674556	2.07399e-10	-0.0903961	0.501131	-0.287349	0.0241977
EF1826	alcohol dehydrogenase, zinc-containing		R	5	1.1.1.1	K13953	EF1826	-0.154654	0.190041	0.543651	2.76764e-08	-0.293722	0.00211766	0.332353	0.000311708	-0.00101387	0.992017
EF2995	conserved hypothetical protein		TQ	4		K09684	EF2995	0.0797652	0.370619	0.543274	2.36896e-07	0.427456	3.22443e-06	0.0976257	0.211804	0.393261	1.11163e-07
EF1616	CoA-binding domain protein		R	1		K06929	EF1615-EF1616	-0.236756	0.171963	0.543223	0.00191246	-0.456712	0.00611986	0.51872	7.24764e-08	-0.248432	0.00155603
EF1589	acetyltransferase, GNAT family		R	5			EF1589-EF1590	0.242811	0.400527	0.540608	0.0818768	0.813415	0.000175979	-0.621655	0.0260484	0.146733	0.551767
EF1156	transcriptional regulator, GntR family		K	3		K03710	EF1156-EF1157	0.219521	0.00623132	0.539954	3.51593e-11	-0.0790906	0.267037	-0.130474	0.162666	-0.145	0.0841538
EF0926	DNA-binding response regulator		TK	2			EF0926-EF0927	0.0260356	0.733202	0.538269	7.20941e-13	-0.284203	2.62469e-06	0.310477	7.61132e-05	-0.240156	0.000933999
EF0743	hypothetical protein		X	5			EF0743	-0.381635	0.0168312	0.536845	1.70059e-07	-0.341745	0.00497572	0.775551	3.18e-07	0.155125	0.363611
EF2644	diacylglycerol kinase catalytic domain protein		IR	3			EF2644	-0.264942	0.0124443	0.535114	1.37135e-08	0.27778	0.000998515	0.106248	0.174885	0.563022	1.18844e-12
EF1769	PTS system, IIB component, putative		G	3		K02760	EF1769	-0.084106	0.419202	0.533696	1.99681e-08	0.236933	0.00759342	0.118092	0.116307	0.401836	4.85489e-09
EF0877	oxidoreductase, aldo/keto reductase 2 family		R	5			EF0877	-0.155567	0.144319	0.531331	2.51805e-08	-0.57962	6.0233e-11	0.335533	4.91376e-05	-0.407151	1.83543e-05
EF0116	conserved hypothetical protein		S	1			EF0116-EF0117	0.377607	0.00143989	0.531092	8.51954e-06	0.495325	5.26464e-07	0.3653	0.00135377	0.216853	0.0394852
EF0019	PTS system, IIB component		X	5	2.7.1.69	K02794	EF0019	0.102229	0.572828	0.528383	0.00298087	-0.545814	0.000968967	0.567823	3.87565e-07	-0.307516	0.00153848
EF2199	YihY family protein	yihY	S	1		K07058	EF2199-EF2200	0.0334694	0.728292	0.528091	2.85102e-07	0.468693	2.93448e-11	0.972226	1.7648e-27	0.348941	0.000114776
EF1138	oxidoreductase, aldo/keto reductase family		R	5			EF1138	-0.220219	0.23798	0.527271	0.00534198	-0.232866	0.204257	0.0904432	0.365261	0.101595	0.186498
EF3080	peptidase T	pepT-2	E	3	3.4.11.-	K01258	EF3080	0.110084	0.22636	0.52725	3.98681e-09	0.0570381	0.430076	0.0589971	0.534561	0.0681616	0.460897
EF0045	cysteinyl-tRNA synthetase	cysS	J	1	6.1.1.16	K01883	EF0039-EF0049	-0.30123	0.0748455	0.524229	0.00217679	-0.943992	1.01648e-21	0.428036	8.24122e-06	-0.396999	2.19082e-07
EF1122	ribonuclease PH/Ham1 protein	rph	F	3	2.7.7.56		EF1121-EF1123	-0.113431	0.507211	0.518017	0.00273435	0.0920243	0.580178	0.29401	0.00178085	0.360943	1.94465e-06
EF2711	transcriptional regulator, AraC family		X	5			EF2711	0.227216	0.200905	0.516049	0.00366661	0.37551	0.03499	-0.150165	0.460013	-0.109916	0.628764
EF0194	NADH-dependent butanol dehydrogenase, putative		C	3			EF0194	-0.124467	0.511696	0.513485	0.00683665	0.0728016	0.696019	0.227692	0.0313822	0.199547	0.0160475
EF2723	conserved hypothetical protein		E	3		K16203	EF2723-EF2725	-0.0912971	0.678313	0.513147	0.00898551	-0.44981	0.0188985	0.244378	0.181407	-0.718227	5.25323e-05
EF1946	hypothetical protein		X	5			EF1946-EF1947	-0.377106	0.0122364	0.512651	4.83285e-06	0.027276	0.814915	0.447108	0.0263961	0.239709	0.0906629
EF1796	lipoprotein, putative		X	5			EF1796	-0.16925	0.0880447	0.507008	2.57849e-08	0.614298	1.18759e-13	0.299344	3.10326e-05	0.761985	3.02534e-26
EF3130	hypothetical protein		X	5			EF3130-EF3132	-0.10189	0.302807	0.502623	1.51869e-08	-0.0936419	0.252102	0.331466	1.6854e-05	0.142446	0.0518475
EF3019	conserved hypothetical protein		X	1			EF3019-EF3020	0.178599	0.261089	0.500595	0.00266786	-0.0176793	0.928977	0.520333	0.00137688	-0.233023	0.127361
EF2961	ribokinase	rbsK	G	3	2.7.1.15	K00852	EF2959-EF2962	-0.00895992	0.958211	0.496779	0.0036234	-0.624054	2.15181e-05	-0.21228	0.0268658	-0.18622	0.0155325
EF2977	PTS system, IID component		X	3		K17467	EF2975-EF2981	-0.113895	0.824068	0.494394	0.0941766	0.539097	0.0573695	0.571527	0.107296	0.245672	0.435728
EF2577	aspartate/ornithine carbamoyltransferase family protein		E	3			EF2577-EF2579	-0.161795	0.676347	0.492663	0.0850691	-0.00377504	1	0.646382	0.0258752	0.074903	0.82153
EF1912	ROK family protein		KG	3			EF1912-EF1913	-0.362391	0.000204052	0.492579	6.91859e-10	-0.438967	4.19725e-08	0.16012	0.07718	0.0517857	0.562911
EF3106	peptide ABC transporter, peptide-binding protein		E	3		K02035	EF3105-EF3106	-0.307748	0.0991854	0.49158	0.00888688	0.0194725	0.916492	0.00682749	0.948918	0.551305	1.30691e-11
EF1140	lactoylglutathione lyase	gloA	E	3	4.4.1.5	K01759	EF1140	0.146222	0.132487	0.489938	6.15899e-08	-0.308925	0.000174328	0.130045	0.0835471	-0.454358	1.9005e-09
EF2636	hypothetical protein		X	5			EF2636-EF2637	-0.397374	0.0174288	0.488939	0.00134225	0.0536347	0.720568	0.814141	2.72982e-05	0.224406	0.150836
EF0253	aldehyde dehydrogenase		C	3			EF0253	0.0851198	0.685054	0.487708	0.0304371	-0.0736172	0.716539	0.331087	0.0595855	0.0961447	0.551217
EF0069	N-acetylmannosamine-6-phosphate epimerase, putative		G	3		K01788	EF0069	0.35851	0.00256601	0.474974	0.000153065	0.0920261	0.450651	0.295881	0.00662749	-0.265231	0.00896549
EF3150	peptidase, M16 family		R	5			EF3150-EF3151	0.0338361	0.720864	0.474777	1.03048e-07	-0.364895	7.18057e-06	0.469419	1.2421e-11	-0.295684	1.88255e-05
EF1322	conserved hypothetical protein		X	5			EF1322	-0.0687251	0.50824	0.469991	5.61935e-06	-0.251246	0.00498314	-0.332498	2.88649e-05	0.318503	2.07203e-05
EF2973	alkaline phosphatase	phoZ	X	5	3.1.3.1	K01077	EF2973	0.595043	6.478e-05	0.469745	7.24618e-08	-0.0475901	0.530879	0.0249869	0.870433	-0.536581	0.000670707
EF1347	glycosyl hydrolase, family 13		X	5		K01208	EF1346-EF1349	-0.0828956	0.613824	0.469094	9.41593e-05	-0.363753	0.00339294	0.371598	0.018936	-0.125939	0.400893
EF2483	hypothetical protein		X	5			EF2483	-0.209199	0.0433001	0.468292	1.0642e-05	-0.649175	1.16594e-12	-0.136513	0.0759403	-0.316124	0.000105916
EF3320	citrate lyase, beta subunit	citE	G	3	4.1.3.6	K01644	EF3317-EF3326	0.147264	0.138233	0.467435	2.74467e-06	-0.258073	0.00223473	0.861188	4.72681e-20	-0.466517	5.64427e-07
EF3178	peptidase, M20/M25/M40 family		E	3		K01439	EF3178	-0.302184	0.0975893	0.467357	0.0130003	-0.414783	0.019819	0.274349	0.0049177	0.0504153	0.554401
EF0793	ABC transporter, ATP-binding protein		V	4		K02003	EF0792-EF0793	-0.0366367	0.730455	0.464535	9.16612e-05	0.218551	0.00383814	0.119024	0.252074	0.208305	0.0326971
EF1238	glycosyl hydrolase, family 3		X	3		K05349	EF1232-EF1240	-0.0227498	0.885277	0.464467	0.00986395	0.331085	0.00886696	0.33574	0.0446901	0.360831	0.00679797
EF3010	conserved hypothetical protein		C	5			EF3009-EF3012	0.202323	0.473708	0.463287	0.140726	0.23209	0.381801	-0.11492	0.665263	0.0183465	1
EF2202	tspO protein, putative		T	2		K05770	EF2202	-0.0801761	0.528816	0.462653	0.000359347	0.514036	7.51485e-07	0.412103	0.00217955	0.3657	0.00375469
EF3239	conserved hypothetical protein		R	5		K07069	EF3239	-0.000939236	0.98773	0.455324	0.00175228	0.0635528	0.644083	0.727426	1.24174e-06	0.254537	0.0597734
EF3295	conserved hypothetical protein		X	5			EF3295	-0.142657	0.163641	0.454578	4.31252e-07	-0.435326	1.33818e-07	0.630838	3.64857e-16	-0.293731	8.36619e-05
EF3005	choloylglycine hydrolase family protein		M	4		K01442	EF3005	0.219581	0.00477894	0.454437	1.17371e-07	-0.441959	5.19946e-11	0.27409	0.0012702	-0.431728	2.38009e-08
EF2985	permease, putative		V	4		K02004	EF2985-EF2987	-0.176455	0.109454	0.454326	1.77457e-05	-0.0935943	0.321854	0.0600413	0.601934	0.393613	6.84912e-05
EF0804	amino acid ABC transporter, amino acid-binding protein		E	3		K02030	EF0804-EF0806	0.142065	0.292237	0.452294	0.000141721	0.314772	0.00259383	0.581149	9.90315e-06	0.194325	0.108289
EF1554	conserved hypothetical protein		X	5			EF1553-EF1554	0.00247817	0.980524	0.45073	6.84913e-07	0.603509	6.50642e-13	0.220083	0.00281265	0.696328	2.1285e-22
EF2603	PTS system, IIA component		X	5	2.7.1.69	K02781	EF2602-EF2603	-0.0393927	0.628009	0.450446	6.71612e-06	-0.465164	1.97264e-11	0.0876199	0.248441	-0.287551	0.000194281
EF1673	ABC transporter, ATP-binding protein		V	4		K02003	EF1672-EF1673	-0.484768	0.00207036	0.449204	0.00456515	-0.222327	0.113061	-0.374128	0.0189309	0.768851	1.24432e-10
EF2983	glutamyl-tRNA(Gln) amidotransferase, A subunit, putative		X	5		K01426	EF2983	0.159208	0.078596	0.447532	6.48335e-10	0.111892	0.0914408	0.0354321	0.721864	0.157366	0.103056
EF1680	conserved hypothetical protein		X	5			EF1678-EF1684	0.081201	0.403331	0.444565	1.20059e-05	0.285554	3.73235e-05	0.547803	5.3325e-09	0.320132	0.000401545
EF1698	NADPH-dependent FMN reductase domain protein		R	5		K19784	EF1698	-0.360449	0.00118248	0.442519	5.58633e-06	0.368163	3.13145e-05	0.529696	2.9927e-10	0.784235	3.71654e-16
EF1032	daunorubicin resistance protein	drrC	L	1			EF1032	0.124745	0.151296	0.44142	3.07394e-08	0.181896	0.00671502	0.0791145	0.401154	0.0601307	0.474607
EF2582	chlorohydrolase family protein		FR	3			EF2577-EF2582	0.245311	0.318718	0.440131	0.119271	0.340055	0.149152	0.104503	0.649932	0.563082	0.002747
EF1309	hypothetical protein		X	5			EF1309	-0.267029	0.0209883	0.439672	5.38429e-06	0.578909	6.3991e-12	0.284466	0.0144339	0.829395	9.70022e-18
EF0883	primosomal protein DnaI	dnaI	L	1		K11144	EF0881-EF0883	0.0976605	0.326855	0.438454	1.23197e-06	0.342205	4.16874e-05	0.703962	1.1757e-15	0.333186	9.82105e-06
EF1275	ribosome-binding factor A	rbfA	J	1		K02834	EF1270-EF1275	0.139286	0.180292	0.437307	1.71794e-06	-0.387536	9.44586e-06	0.394841	7.77299e-06	-0.52544	1.30495e-08
EF0665	hypothetical protein		X	5			EF0665	-0.311111	0.00625049	0.432418	4.26405e-05	-0.614558	1.11361e-09	0.538788	7.68181e-13	-0.219819	0.00904358
EF3259	conserved domain protein		S	5		K00805	EF3258-EF3260	0.0755171	0.4264	0.43216	4.68502e-06	-0.394227	3.74695e-07	0.269692	0.00820961	-0.496934	4.31354e-08
EF0248	hypothetical protein		X	5			EF0248	-0.305164	0.0916782	0.429798	0.0123314	-0.212875	0.187596	0.745012	1.16705e-08	-0.405334	0.00697497
EF2988	rhodanese family protein		P	2			EF2988-EF2990	0.0247357	0.949339	0.426731	0.05487	-0.0360874	0.911053	-0.135577	0.658263	0.0638947	0.832106
EF1355	pyruvate dehydrogenase complex E2 component, dihydrolipoamide acetyltransferase	aceF	C	3	2.3.1.12	K00627	EF1353-EF1356	0.215347	0.249705	0.426616	0.0187695	-0.693052	5.29194e-05	-0.331925	0.00272763	-0.884728	8.74903e-22
EF3020	conserved hypothetical protein		K	1			EF3019-EF3020	0.764633	0.0242305	0.425363	0.225039	0.800349	0.0062004	-0.0685156	0.904803	0.352098	0.199481
EF0463	superoxide dismutase, Mn	sodA	P	2	1.15.1.1	K04564	EF0463	0.302093	0.0944973	0.424141	0.0186488	-0.650252	0.000115261	-0.280209	0.00464556	-0.918047	1.65998e-31
EF2678	conserved hypothetical protein		P	2		K16509	EF2678	-0.342378	0.0681045	0.422282	0.0245022	-0.109862	0.551351	0.802433	4.14271e-12	0.138948	0.177268
EF2785	hypothetical protein		X	5			EF2785-EF2786	-0.324964	0.058674	0.419768	0.0146547	0.364143	0.0350964	0.484719	4.05601e-07	0.791268	1.49528e-24
EF1310	dnaJ protein	dnaJ	O	4		K03686	EF1310	-0.349182	0.0621519	0.419598	0.0204613	0.313953	0.0790386	0.635856	5.50748e-09	0.577655	4.20638e-08
EF2989	coenzyme A disulfide reductase		R	2			EF2988-EF2990	0.19798	0.108574	0.418702	0.000586875	0.0523037	0.585627	-0.243227	0.0634835	-0.0477456	0.691473
EF3033	PTS system, IIA component		G	3		K02793	EF3029-EF3034	-0.808014	0.0254776	0.418289	0.219087	-0.844736	0.010944	0	0	0
EF1230	hypothetical protein		X	5			EF1228-EF1230	-0.0799875	0.671739	0.418056	0.0571828	0.210003	0.255436	-0.104619	0.67833	0.0472732	0.836832
EF0819	conserved hypothetical protein		X	5			EF0819	-0.138096	0.122941	0.416167	1.06952e-06	0.274462	0.000617036	0.751372	3.97773e-10	0.464109	1.15124e-07
EF1069	galactokinase	galK	G	3	2.7.1.6	K00849	EF1069-EF1072	-0.0851552	0.712503	0.415872	0.0454833	-0.209943	0.257663	-0.136889	0.540764	0.241579	0.154476
EF0710	phosphoenolpyruvate-protein phosphotransferase enzyme I	ptsI	G	3	2.7.3.9	K08483	EF0709-EF0710	-0.206541	0.310515	0.415377	0.0389919	-0.448946	0.0250081	0.324862	0.00702509	-0.306983	0.00598897
EF3114	DAK2 domain protein		R	1		K07030	EF3111-EF3115	-0.144537	0.455771	0.414193	0.0287542	-0.302378	0.0996575	0.650126	4.59796e-08	-0.332839	0.0014282
EF0042	2C-methyl-D-erythritol 2,4-cyclodiphosphate synthase	ispF	X	1	4.6.1.12	K01770	EF0039-EF0049	0.0584433	0.44198	0.413325	6.33837e-06	-0.0277223	0.607303	0.310293	2.45514e-05	-0.0654726	0.355726
EF0698	acetyltransferase, GNAT family		X	5			EF0698	0.322548	1.48596e-05	0.41129	6.90518e-08	-0.481468	6.32543e-14	0.549791	2.50702e-12	-0.687698	3.27111e-18
EF0256	peptidyl-tRNA hydrolase	pth	X	1	3.1.1.29	K01056	EF0256-EF0260	0.252633	0.00544626	0.409849	5.9326e-05	0.622968	5.63293e-20	0.430052	4.57122e-06	0.403983	3.90853e-06
EF0405	hydrolase, haloacid dehalogenase-like family		R	5			EF0405	0.0873502	0.386514	0.406014	6.1238e-06	0.847012	9.43889e-35	0.142367	0.174963	0.926489	9.44589e-23
EF2616	SsrA-binding protein	smpB	O	4		K03664	EF2616-EF2620	0.27951	0.00345874	0.404859	2.26186e-05	0.222948	2.51944e-05	0.116022	0.225127	0.118577	0.218704
EF1127	putative transport protein SgaT protein	sgaT	X	3		K03475	EF1125-EF1131	-0.179351	0.572611	0.40349	0.126116	0.48393	0.0614548	0.742822	0.00323299	0.575695	0.00992186
EF1807	tagatose 1,6-diphosphate aldolase	lacD-2	G	3	4.1.2.40	K01635	EF1806-EF1807	-0.0607995	0.617365	0.401174	0.001837	0.0286155	0.855368	0.224629	0.0970116	0.0901763	0.455252
EF2991	conserved hypothetical protein		S	5			EF2991	-0.14782	0.543301	0.400643	0.107006	0.769897	0.000834684	0.339039	0.119665	0.624477	0.0018121
EF2776	thiamine-phosphate pyrophosphorylase	thiE	H	4	2.5.1.3	K00788	EF2775-EF2778	0.0733625	0.586468	0.399642	0.00405546	0.197552	0.0629089	0.00151275	1	0.177601	0.186071
EF1130	hexulose-6-phosphate isomerase SgbU, putative		G	3		K03079	EF1125-EF1131	0.2539	0.488167	0.398455	0.302743	0.571765	0.0904823	0.19601	0.548973	-0.235325	0.420165
EF1204	conserved hypothetical protein		S	5			EF1202-EF1204	0.0238671	0.807183	0.398381	1.01644e-05	-0.0956628	0.237832	0.319421	1.1014e-05	0.0166396	0.823884
EF1024	pyruvate phosphate dikinase	ppdK	G	3	2.7.9.1	K01006	EF1024	0.158816	0.13844	0.396951	0.000117231	-0.431591	2.84843e-06	0.177197	0.179183	-0.418073	0.000148131
EF1155	endonuclease III	nth	L	1	4.2.99.18	K10773	EF1154-EF1155	-0.0784561	0.429285	0.396772	6.30973e-06	-0.16142	0.0470341	0.411494	7.96191e-08	0.0230892	0.759591
EF2673	conserved domain protein		Q	4			EF2672-EF2673	0.340418	2.87153e-06	0.394491	1.87162e-09	0.324365	9.31095e-09	-0.447421	3.47427e-08	-0.283625	0.000120039
EF0169	lipase/acylhydrolase		E	3			EF0169	-0.206141	0.0435724	0.393477	2.70437e-05	-0.339311	6.41295e-09	-0.251505	0.00103183	0.0199967	0.78253
EF2070	tRNA (5-methylaminomethyl-2-thiouridylate)-methyltransferase	trmU	J	1	2.1.1.61	K00566	EF2070	-0.158907	0.116519	0.393018	2.31018e-05	-0.145807	0.116052	0.480783	9.89128e-11	-0.0877898	0.292601
EF1627	ethanolamine ammonia-lyase small subunit	eutC	X	3	4.3.1.7	K03736	EF1623-EF1627	0.533065	0.03114	0.392313	0.165603	0.614745	0.00680657	-0.178144	0.517226	-0.248005	0.277796
EF0025	membrane protein, putative		S	5			EF0025	-0.476792	0.0131149	0.389094	0.025594	0.670308	2.90768e-05	0.804057	1.58649e-05	0.377251	0.0312878
EF1516	PTS system, IIABC components		G	1	2.7.1.69	K02802	EF1515-EF1516	0.202473	0.0483055	0.387716	3.31056e-05	0.302729	0.000419514	-0.106706	0.20322	-0.0210964	0.789313
EF1203	conserved hypothetical protein TIGR00250		X	5		K07447	EF1202-EF1204	0.0623737	0.51695	0.387711	1.51768e-05	-0.203365	0.0116836	0.0533976	0.432052	0.0314876	0.665629
EF0255	L-lactate dehydrogenase	ldh-1	C	3	1.1.1.27	K00016	EF0255	0.495647	0.00740589	0.387425	0.0335632	-0.265096	0.140595	0.0772505	0.473773	-0.674732	1.6389e-16
EF2778	thiW protein	thiW	S	4			EF2775-EF2778	0.226562	0.122211	0.385384	0.0126583	0.185859	0.169313	0.181736	0.264185	-0.250042	0.0892992
EF1709	sugar-binding transcriptional regulator, GntR family		K	1			EF1709	0.0912602	0.234167	0.385173	1.16339e-07	0.214492	0.000563696	0.434493	1.95341e-07	0.33358	1.18326e-05
EF2437	conserved hypothetical protein		X	3		K09963	EF2434-EF2437	0.202681	0.109031	0.384632	0.00564602	-0.267392	0.0130943	-0.149614	0.247744	-0.483282	0.00010703
EF3311	glucose-inhibited division protein A	gidA	D	5		K03495	EF3311-EF3313	0.29174	0.00500386	0.384352	3.56658e-05	-0.184727	0.0285464	0.159364	0.0393035	-0.361351	3.82405e-06
EF1411	glycosyl hydrolase, family 4		G	3		K01222	EF1411	0.466234	0.010979	0.383758	0.0524308	-0.284958	0.119184	-0.475076	0.00851463	-0.296775	0.0687389
EF1903	conserved hypothetical protein		S	5			EF1903	-0.111571	0.302169	0.382644	8.08147e-07	0.324378	3.42825e-06	0.526395	1.24955e-06	0.413443	8.95611e-05
EF0666	glyoxalase family protein		E	3		K15975	EF0666	0.18325	0.283982	0.380788	0.0243762	0.736261	1.72611e-05	0.0779976	0.42062	0.66876	5.78083e-15
EF1560	hypothetical protein		X	5			EF1560	-0.0439746	0.813082	0.380188	0.0401977	-0.435197	0.0140132	0.391573	0.000159685	-0.255347	0.00135848
EF0745	glyoxalase family protein		X	5			EF0745	0.100725	0.289076	0.379484	2.47406e-05	-0.00101756	0.989145	0.195476	0.0535907	-0.195522	0.0409961
EF0974	conserved hypothetical protein		R	3			EF0973-EF0974	-0.257088	0.0105118	0.379475	1.65186e-05	-0.385728	2.89738e-06	0.288998	0.000119524	-0.052959	0.451715
EF0771	ATP-dependent Clp protease, proteolytic subunit ClpP	clpP	OU	4	3.4.21.92	K01358	EF0771	-0.0158852	0.92795	0.378973	0.0288387	-0.0148276	0.930622	0.51144	1.98797e-07	0.1396	0.0621932
EF2226	ABC transporter, ATP-binding/permease protein		V	4		K06147	EF2226-EF2227	0.544961	0.00512199	0.378459	0.0840616	0.420355	0.0238645	-0.446935	0.0662152	-0.242631	0.170183
EF1075	acetyltransferase, GNAT family		X	5			EF1075-EF1077	-0.174393	0.029858	0.377912	2.79582e-06	-0.559275	6.17462e-19	-0.297306	0.00107173	-0.188295	0.0200902
EF2049	ABC transporter, permease protein, putative		V	4		K11636	EF2049-EF2050	-0.214611	0.0409107	0.377546	0.000154003	-0.231542	0.0103232	-0.301669	0.000142834	0.0178421	0.795075
EF2978	PTS system, IIC component		X	3	2.7.1.69	K17466	EF2975-EF2981	0.884755	0.00194255	0.375904	0.251431	0.297372	0.352864	-0.167149	0.550724	-0.131032	0.599143
EF3304	transaldolase-like protein MIPB	mipB	X	4			EF3304-EF3310	0.244765	0.156681	0.374894	0.0587244	0.559477	1.79532e-05	-0.0828511	0.639051	0.208131	0.180477
EF3262	transcriptional regulator, PemK family		T	2		K07171	EF3261-EF3262	-0.111567	0.197351	0.374683	3.26003e-06	0.092509	0.173568	0.293436	0.000907686	0.051483	0.51942
EF1042	multidrug resistance protein, putative		X	5			EF1042	-0.409963	1.4745e-06	0.373447	0.000101	0.0753085	0.41078	0.236374	0.00927303	0.348716	2.15839e-06
EF0942	ABC transporter, ATP-binding/permease protein		V	4		K06147	EF0941-EF0942	0.155275	0.0426406	0.372524	7.11741e-08	0.469479	2.57405e-17	-0.5752	3.27147e-11	0.295286	0.000187664
EF2579	diaminopropionate ammonia-lyase, putative		E	3		K01751	EF2577-EF2579	0.427376	0.202079	0.371221	0.29633	0.221996	0.517202	0.309345	0.407266	-0.0905042	0.780009
EF2928	FolC family protein		H	4		K11754	EF2927-EF2928	-0.0404693	0.810984	0.369919	0.0273776	-0.494861	0.00177658	-0.33949	0.000169723	-0.541279	2.30713e-13
EF2974	MutS2 family protein		L	1		K07456	EF2974	0.61598	2.99233e-09	0.367663	4.51319e-05	-0.07255	0.349257	-0.198025	0.0595689	-0.522954	4.22637e-07
EF2909	conserved hypothetical protein		S	5			EF2909	0.109488	0.142012	0.364075	1.36398e-06	0.0374673	0.533122	0.042514	0.604087	-0.150428	0.0511027
EF1808	agaS protein		M	1		K02082	EF1808-EF1809	0.153318	0.220621	0.362487	0.00375118	0.11772	0.276039	-0.530029	0.000125207	0.254243	0.0890102
EF1770	hypothetical protein		X	5			EF1770	-0.154719	0.070131	0.361713	1.43206e-05	-0.439079	2.71403e-08	-0.111953	0.221423	-0.207679	0.0176366
EF1124	transcriptional regulator, DeoR family		KG	1			EF1124	-0.242347	0.0457002	0.361039	0.00166687	-0.839362	2.38536e-14	0.084333	0.549068	-0.34083	0.0026707
EF0121	hypothetical protein		X	5			EF0120-EF0123	0.0104417	0.972178	0.360999	0.0346149	0.186095	0.200845	0.12295	0.495554	0.296359	0.0801924
EF1022	hypothetical protein		X	5			EF1022	-0.480455	0.00103253	0.359596	0.00681323	-0.509336	8.21676e-05	0.391714	3.49665e-06	0.219534	0.00964411
EF1017	PTS system, IIB component		G	3	2.7.1.69	K02760	EF1017-EF1018	-0.0638998	0.731628	0.358858	0.0557288	-0.709459	5.57579e-05	0.400851	0.000371258	-0.221689	0.00869281
EF1490	hypothetical protein		X	3			EF1490-EF1491	0.113839	0.252098	0.355382	0.00152057	0.182768	0.0595663	0.131975	0.185123	0.112084	0.210965
EF0834	PTS system, IIC component		G	3		K02761	EF0834	0.245592	0.148265	0.355255	0.068009	0.0116324	0.953595	0.449234	0.00879826	-0.544805	0.000538579
EF2724	peptidase, M42 family		G	3			EF2723-EF2725	-0.216491	0.245325	0.354289	0.0360445	-0.299796	0.0729747	0.487803	0.00791467	-0.307437	0.0941077
EF3180	RNA polymerase sigma-70 factor, ECF subfamily		K	1		K03088	EF3179-EF3180	0.462019	0.0457436	0.352556	0.170477	0.892665	1.07047e-05	0.159077	0.477494	0.223458	0.272003
EF3092	glyoxalase family protein		R	5		K07032	EF3092	0.0876294	0.238564	0.352419	3.3266e-07	0.184785	0.00130105	0.164012	0.0446122	0.36115	1.15335e-06
EF3312	tRNA modification GTPase TrmE	trmE	R	5		K03650	EF3311-EF3313	0.268366	0.00762661	0.35172	0.000196638	-0.362168	2.79597e-05	-0.258648	0.000466404	-0.575726	1.09625e-15
EF2654	alcohol dehydrogenase, zinc-containing		CR	4			EF2654-EF2657	-0.00247932	0.981797	0.351624	0.000126821	-0.325719	9.7199e-05	-0.299445	0.000106602	-0.214933	0.00399224
EF2777	hydroxyethylthiazole kinase, putative		H	4		K00878	EF2775-EF2778	0.304389	0.0219587	0.350888	0.00385715	0.0385811	0.752921	0.028646	0.837234	-0.0380734	0.761209
EF1302	transcriptional regulator, putative		K	1			EF1302	0.23732	0.120037	0.348785	0.0272519	-0.137886	0.371583	-0.492398	0.00158961	-0.470002	0.00111046
EF1598	deoxyribodipyrimidine photolyase	phrB	L	1	4.1.99.3	K01669	EF1598	-0.0849831	0.381849	0.347571	0.000434302	0.0877525	0.264929	-0.357356	0.000391024	0.0405495	0.709622
EF2760	conserved hypothetical protein		S	5			EF2757-EF2764	-0.111748	0.238844	0.346528	0.000100006	0.725951	5.33531e-20	0.542376	4.22348e-13	0.906254	2.11397e-36
EF3313	hypothetical protein		X	5			EF3311-EF3313	0.313768	0.114582	0.344133	0.096217	-0.59569	0.00672742	-0.394118	0.065414	-0.806706	2.58147e-05
EF2761	conserved hypothetical protein		S	5			EF2757-EF2764	-0.0191992	0.908616	0.343264	0.0359302	0.67828	3.91765e-05	0.501785	1.81565e-07	0.751304	1.20722e-21
EF0090	diacylglycerol kinase catalytic domain protein		IR	3			EF0090	-0.0278119	0.805983	0.341012	0.035701	-0.312386	7.56757e-05	-0.438625	4.78763e-09	-0.20615	0.00620061
EF3196	response regulator		KT	1		K07705	EF3193-EF3197	0.0240268	0.788685	0.33943	4.95565e-05	0.784262	5.95714e-32	0.345666	0.000271225	0.761586	9.33364e-19
EF2420	homoserine kinase	thrB	E	3	2.7.1.39	K00872	EF2420-EF2422	-0.0535617	0.750935	0.339201	0.0411771	0.398546	0.0158284	0.276672	0.00389263	0.617762	1.39167e-14
EF2609	ATP synthase F1, gamma subunit	atpG	C	3	3.6.3.14	K02115	EF2607-EF2614	0.25424	0.189002	0.33862	0.0712373	-0.171084	0.351559	0.16641	0.135648	-0.30404	0.00049712
EF0939	methylglyoxal synthase	mgsA	X	5	4.2.99.11	K01734	EF0939	-0.195708	0.0384501	0.337593	1.3739e-05	-0.0142561	0.829076	0.120058	0.218709	0.167784	0.0678014
EF3185	conserved hypothetical protein		X	5			EF3184-EF3188	-0.00556918	0.96277	0.335967	1.92095e-05	-0.365738	3.3004e-08	0.358247	0.00133076	-0.306454	0.00762347
EF0986	cation transporter		P	2		K03284	EF0985-EF0986	-0.0303784	0.725914	0.333287	8.67552e-06	-0.249705	0.000164934	-0.288528	0.00155099	-0.242934	0.00361188
EF2956	oxidoreductase, short-chain dehydrogenase/reductase family		R	5			EF2956-EF2957	0.246754	0.179668	0.333017	0.0783293	0.782014	2.97498e-08	0.444466	0.0254571	0.164375	0.336521
EF1618	ethanolamine utilization protein EutH	eutH	X	5		K04023	EF1617-EF1622	0.295559	0.0885362	0.332698	0.158837	-0.111263	0.510504	-0.0918276	0.666958	-0.0469117	0.769653
EF3028	putative tRNA-binding domain protein		R	5		K06878	EF3028	-0.172501	0.0763826	0.3326	0.000560386	-0.426343	6.30759e-07	0.312951	1.12074e-05	-0.170234	0.0105453
EF0382	conserved hypothetical protein		TQ	4		K09684	EF0381-EF0382	0.00454801	0.951742	0.332301	4.97427e-06	0.781621	4.12625e-35	0.343004	2.57771e-05	0.84862	6.00234e-27
EF0043	glutamyl-tRNA synthetase	gltX	J	1	6.1.1.17	K09698	EF0039-EF0049	-0.0881413	0.647707	0.332226	0.0865749	-0.481826	0.0106192	0.252022	0.0130757	-0.360749	2.83896e-06
EF1365	conserved hypothetical protein		R	5			EF1365-EF1366	0.0646099	0.5594	0.331976	8.25593e-05	0.905275	2.86105e-21	0.499407	3.40601e-05	0.446855	1.97028e-05
EF1009	ATP-dependent RNA helicase, DEAD/DEAH box family		LKJ	1			EF1008-EF1010	0.163464	0.126802	0.331895	0.000282946	0.0145867	0.861049	0.0150268	0.862255	-0.0136152	0.874171
EF2701	acetyltransferase, GNAT family		X	5			EF2697-EF2701	-0.21591	0.050232	0.331759	0.00015872	0.256034	0.00140903	0.610827	4.46479e-07	0.312668	0.00518106
EF1089	conserved hypothetical protein		S	5			EF1089	-0.403796	0.0472731	0.331491	0.0726837	-0.0659328	0.7175	0.62125	1.33345e-06	0.455247	0.000191358
EF0941	ABC transporter, ATP-binding/permease protein		V	4		K06147	EF0941-EF0942	0.0994263	0.400097	0.328824	0.000919004	0.458111	3.03438e-07	0.0569362	0.550285	0.467749	5.92151e-07
EF2755	anaerobic ribonucleoside-triphosphate reductase activating protein	nrdG	O	3		K04068	EF2754-EF2755	-0.258914	0.0097361	0.328534	0.00312804	-0.103171	0.209612	0.965327	2.81321e-24	-0.00230745	0.976655
EF2751	permease protein, putative		V	4		K02004	EF2751-EF2752	-0.0163232	0.851043	0.327637	2.45271e-07	0.822417	7.08133e-23	0.6106	3.70868e-13	0.779547	4.36607e-23
EF1356	pyruvate dehydrogenase complex E3 component, dihydrolipoamide dehydrogenase	lpdA	C	3	1.8.1.4	K00382	EF1353-EF1356	0.189592	0.295064	0.327174	0.0669961	-0.602173	0.000364656	-0.267907	0.0104454	-0.868773	6.58225e-26
EF1206	malate dehydrogenase, decarboxylating		C	3	1.1.1.39	K00027	EF1206-EF1207	0.15948	0.449141	0.326584	0.143519	0.0904506	0.650401	0.435868	0.0385136	-0.0139633	0.969039
EF0124	hypothetical protein		X	5			EF0124	-0.000923229	1	0.325676	0.0224663	0.290837	0.0110365	0.0863688	0.619397	0.089186	0.528901
EF3187	cell wall surface anchor family protein		X	5			EF3184-EF3188	-0.00272657	0.981452	0.325365	0.000854111	0.0535733	0.49287	0.317806	0.0129609	0.0274812	0.813708
EF2589	mannose-6-phosphate isomerase, class I	manA	G	3	5.3.1.8	K01809	EF2589	-0.221826	0.0514428	0.324447	0.0504075	-0.456618	1.83179e-08	0.300938	0.000486558	-0.2159	0.00450308
EF0858	phage infection protein	pip	S	5		K01421	EF0858	0.0825928	0.394876	0.32411	0.000188007	-0.517748	1.4125e-10	-0.0141516	0.848784	-0.586124	2.95966e-15
EF3186	conserved hypothetical protein		X	5			EF3184-EF3188	-0.0243002	0.811395	0.322286	1.07257e-05	-0.385769	7.0112e-10	0.290402	0.00595227	-0.332978	0.00142675
EF1535	conserved hypothetical protein		X	5		K09963	EF1535	0.190964	0.125869	0.321825	0.0097561	-0.0989729	0.35583	-0.0692296	0.554004	-0.366556	0.00145388
EF2481	hydrolase, haloacid dehalogenase-like family		R	5		K01091	EF2481	0.0851407	0.572436	0.321672	0.0916523	0.645094	8.13177e-07	0.149125	0.332584	0.357267	0.00383884
EF0784	S-adenosylmethionine synthetase	metK	H	4	2.5.1.6	K00789	EF0784	0.026285	0.884998	0.320674	0.0764354	-0.711413	4.14929e-05	0.361451	0.000375969	-0.578672	3.59265e-12
EF0835	hypothetical protein		X	5			EF0835-EF0840	0.238258	0.438014	0.318704	0.364133	0.219842	0.455298	0.137758	0.62017	-0.372534	0.278114
EF1967	conserved hypothetical protein		X	5			EF1967-EF1969	-0.356165	0.000784238	0.317361	0.00185725	-0.422964	1.26767e-06	0.882061	5.69943e-27	-0.255174	0.00353977
EF3330	jag protein, putative		R	4		K06346	EF3330-EF3333	0.077659	0.639589	0.315021	0.0542027	-0.395064	8.40501e-07	0.151134	0.103516	-0.336809	5.003e-06
EF3021	conserved hypothetical protein		X	5			EF3021	-0.171658	0.0238525	0.315004	0.000710046	-0.202505	0.000654291	-0.039582	0.628882	0.146024	0.0503393
EF0300	membrane protein, putative		R	1			EF0300-EF0301	0.151075	0.139428	0.314692	0.00315997	0.236541	0.0052261	0.134953	0.206534	-0.00565104	0.962718
EF1955	sigma-54 dependent DNA-binding response regulator		KT	1		K19505	EF1955	-0.0179463	0.883825	0.313505	0.0175681	0.378529	0.000188886	0.359039	0.00271619	0.332542	0.00192016
EF0924	conserved hypothetical protein		S	5			EF0924	0.0287089	0.745996	0.312389	0.000193988	0.311885	3.33311e-06	-0.074873	0.390927	0.334888	2.5599e-05
EF1354	pyruvate dehydrogenase complex, E1 component, beta subunit	pdhB	C	3	1.2.4.1	K00162	EF1353-EF1356	0.144088	0.427421	0.311996	0.0823987	-0.765542	4.5153e-06	-0.226929	0.0313457	-0.698969	5.90406e-16
EF1806	tagatose-6-phosphate kinase	lacC	G	3	2.7.1.144	K00917	EF1806-EF1807	0.0122637	0.956766	0.311949	0.0680142	0.122217	0.390911	0.13299	0.546973	0.143798	0.444595
EF3245	cell-envelope associated acid phosphatase		I	3			EF3244-EF3245	0.402442	0.000313929	0.310859	0.0029943	0.377191	5.01046e-06	-0.109175	0.321875	-0.0126091	0.907407
EF1268	cation-transporting ATPase, E1-E2 family		P	2		K12952	EF1268	-0.210066	0.217107	0.310625	0.0610647	0.000986256	0.995504	0.171691	0.0778734	0.154741	0.0569478
EF0890	hypothetical protein		X	5			EF0884-EF0890	0.0525155	0.70854	0.31013	0.0191919	0.495889	6.66098e-06	0.407822	0.00115289	0.268845	0.0453142
EF0671	xaa-his dipeptidase		E	3	3.4.13.3		EF0671	-0.310406	0.094427	0.309132	0.0926116	-0.391023	0.0290886	0.403874	0.000297243	0.00973185	0.914866
EF0675	glycine betaine/carnitine/choline ABC transporter, glycine betaine/carnitine/choline-binding protein		E	3		K05845	EF0674-EF0675	0.0492289	0.514382	0.308774	1.35094e-05	0.418726	1.03442e-11	0.124297	0.116004	0.355146	2.02402e-06
EF2200	methionine aminopeptidase, type I	map	J	1	3.4.11.18	K01265	EF2199-EF2200	-0.274638	0.017284	0.308367	0.00848203	-0.13545	0.129118	0.522144	3.91491e-08	0.142918	0.0963312
EF0709	phosphocarrier protein HPr	ptsH	G	3		K11189	EF0709-EF0710	-0.302511	0.131862	0.306673	0.126606	-0.582544	0.00275848	0.0198641	0.860593	-0.357191	0.000370342
EF2611	ATP synthase F1, delta subunit	atpH	C	3	3.6.3.14	K02113	EF2607-EF2614	0.218787	0.211635	0.305689	0.0715766	-0.266776	0.100504	0.00443394	0.963952	-0.411704	1.63106e-07
EF2925	cold-shock domain family protein		X	5		K03704	EF2925	0.0521007	0.785783	0.305253	0.114876	-0.63535	0.000715708	0.282271	0.0109882	-0.481402	6.92652e-08
EF2370	oxidoreductase, Gfo/Idh/MocA family		R	5			EF2370	0.0109656	0.910941	0.303602	0.00094581	0.0606327	0.463344	0.144233	0.0489922	0.0743256	0.267871
EF0453	OsmC/Ohr family protein		O	4			EF0453	-0.0120133	0.945568	0.302899	0.0799266	-0.130731	0.436345	0.0689722	0.470584	-0.087541	0.275901
EF0805	amino acid ABC transporter, ATP-binding protein		E	3		K02028	EF0804-EF0806	-0.00827441	0.971552	0.302268	0.0226598	-0.0163916	0.941405	0.382493	0.00640436	0.00867943	0.945691
EF1973	conserved hypothetical protein TIGR00256		X	2		K07560	EF1973-EF1974	0.146725	0.130923	0.302074	0.000903734	-0.218088	0.00775796	0.225799	0.00228251	-0.275924	7.30923e-05
EF1667	short chain dehydrogenase family protein		IQR	4		K00059	EF1667	-0.124535	0.23122	0.301926	0.00565484	0.359313	5.18815e-05	0.214233	0.0196833	0.608455	1.89634e-14
EF0947	hydrolase, haloacid dehalogenase-like family		R	5			EF0946-EF0947	-0.108297	0.303674	0.300319	0.00118103	-0.240717	2.49694e-05	0.143233	0.0670872	-0.0207873	0.786363
EF3184	conserved hypothetical protein		X	5			EF3184-EF3188	-0.0129573	0.906752	0.298384	0.000298007	-0.435146	6.53383e-13	0.405135	0.000428738	-0.347908	0.00206804
EF2617	ribonuclease R	vacB	K	4	3.1.-.-	K12573	EF2616-EF2620	0.246257	0.176669	0.298268	0.0907003	0.174672	0.317046	-0.0563614	0.592071	0.122242	0.159427
EF3149	conserved domain protein		S	5			EF3149	0.132527	0.180732	0.298008	0.00150776	0.150913	0.0746363	0.657528	2.36613e-19	-0.108232	0.13501
EF0280	cation efflux family protein		P	2			EF0280-EF0281	0.0487808	0.567392	0.297704	3.42219e-05	-0.137746	0.0232689	-0.0237422	0.781551	-0.276895	0.00111154
EF2784	conserved hypothetical protein		X	5			EF2784	-0.267609	0.00636057	0.296479	0.00489093	0.224472	0.0073186	0.675203	5.8308e-13	0.595155	4.43883e-16
EF2077	ABC transporter, ATP-binding protein		R	5			EF2077	0.445538	1.97765e-06	0.296399	0.00250394	0.98352	9.38967e-44	0.375213	0.000103473	0.329933	0.000276034
EF2399	acetyltransferase, GNAT family		X	1		K03826	EF2395-EF2400	0.289551	0.000793643	0.296272	0.000477512	-0.458437	1.19489e-11	-0.311932	0.00138441	-0.70563	3.19837e-12
EF2461	inositol monophosphatase protein family		G	3		K01092	EF2461-EF2462	-0.190514	0.0805826	0.295547	0.00318859	-0.605907	4.91778e-12	0.0431026	0.61815	-0.341438	1.54173e-05
EF0973	proline dipeptidase	pepQ-1	E	3	3.4.13.9	K01262	EF0973-EF0974	-0.299779	0.0956907	0.294584	0.101474	-0.669516	9.25866e-05	0.110565	0.267691	-0.240007	0.00384147
EF2608	ATP synthase F1, beta subunit	atpD	C	3	3.6.3.14	K02112	EF2607-EF2614	0.257728	0.167586	0.294074	0.107167	-0.0732383	0.686961	0.345787	0.00239703	-0.251896	0.00375441
EF2607	ATP synthase F1, epsilon subunit	atpC	X	3	3.6.3.14	K02114	EF2607-EF2614	0.143498	0.435355	0.293502	0.113579	-0.0428199	0.809211	0.528269	4.34657e-07	-0.0853985	0.289836
EF3089	glutamate--cysteine ligase, putative/amino acid ligase, putative		H	4		K01919	EF3089	-0.126807	0.460561	0.29219	0.0865052	0.0724702	0.66395	0.0768422	0.410054	0.260139	0.000528043
EF1608	cardiolipin synthetase, putative		I	3		K06131	EF1608	-0.168688	0.0930332	0.290938	0.00121617	0.588391	1.067e-13	0.381974	6.51428e-07	0.87548	7.11595e-31
EF0722	DNA ligase, NAD-dependent	ligA	L	1	6.5.1.2	K01972	EF0721-EF0722	-0.038524	0.821841	0.290679	0.086356	-0.707724	8.88094e-06	0.132956	0.152439	-0.657175	1.446e-18
EF0681	conserved hypothetical protein		S	5			EF0681-EF0684	0.12923	0.477444	0.290083	0.113377	-0.248572	0.146005	0.25212	0.0185992	-0.228145	0.00511746
EF1670	phospholipase/carboxylesterase family protein		R	3		K06999	EF1668-EF1670	0.264785	0.197291	0.289486	0.110495	0.5145	0.000775414	-0.277988	0.258142	0.513913	0.00249981
EF0876	hypothetical protein		X	5			EF0876	0.0897948	0.765374	0.289145	0.466178	0.701056	0.00376009	0.355512	0.299057	0.464898	0.059123
EF1261	sensor histidine kinase		T	2	2.7.3.-		EF1260-EF1261	0.0360174	0.712798	0.287275	0.00156006	0.312575	0.00016678	0.300093	9.50313e-06	0.309789	1.7248e-05
EF0040	DNA repair protein RadA	radA	O	1		K04485	EF0039-EF0049	-0.1338	0.431305	0.284662	0.0887972	-0.141248	0.383526	0.298984	0.00164375	-0.0385357	0.643941
EF3318	apo-citrate lyase pyrophosphoribosyl-dephosph-CoA transferase	citX	HI	3		K05964	EF3317-EF3326	-0.270322	0.0148792	0.28351	0.00660442	-0.252359	0.00574301	0.367764	0.00195841	0.0634684	0.591987
EF3261	transcriptional regulator, AbrB family		X	2			EF3261-EF3262	-0.170041	0.0206887	0.282332	0.000400913	-0.0762594	0.213313	0.116045	0.155964	0.0140993	0.853803
EF2888	conserved hypothetical protein		X	5			EF2888	-0.233591	0.00466851	0.281938	0.00472067	-0.465078	1.64118e-13	0.186789	0.0154042	-0.333398	6.02854e-05
EF2864	conserved domain protein		X	5			EF2864	0.0362324	0.736898	0.280322	0.00529053	-0.207089	0.0268122	-0.0236425	0.772691	-0.146342	0.0775303
EF0836	conserved hypothetical protein		X	5		K09963	EF0835-EF0840	-0.0305133	0.87213	0.280067	0.100963	-0.446937	0.00511159	0.447368	0.0344913	-0.213983	0.193473
EF0423	2-dehydro-3-deoxyphosphogluconate aldolase/4-hydroxy-2-oxoglutarate aldolase	eda-1	G	3		K01625	EF0423-EF0426	0.182641	0.646824	0.279355	0.479116	-0.174079	0.683988	0.219505	0.568266	0
EF1553	TPR domain protein		X	5			EF1553-EF1554	0.0107891	0.913533	0.279243	0.00177596	0.511124	0.00126007	0.112971	0.124964	0.578666	2.2687e-14
EF0109	ThiJ/PfpI family protein		R	1			EF0109-EF0110	0.0992552	0.335329	0.279223	0.00978996	0.666293	3.74389e-15	0.00429668	0.972291	0.37672	1.45152e-05
EF2060	cytochrome d ubiquinol oxidase, subunit II	cydB	C	3	1.10.3.-	K00426	EF2058-EF2061	-0.0680393	0.720046	0.279213	0.120907	-0.973196	4.85879e-07	0.509646	1.43618e-05	-0.922415	7.75263e-20
EF3198	lipoprotein, YaeC family		P	2		K02073	EF3198-EF3200	0.186725	0.0659972	0.2788	0.0104274	0.663649	6.08204e-17	0.315542	0.00101564	0.22728	0.0089799
EF0629	oxidoreductase, aldo/keto reductase family		R	3			EF0629-EF0630	-0.386394	1.31046e-05	0.276675	0.00189651	-0.829214	2.24807e-26	-0.0128984	0.901533	-0.528198	1.96724e-08
EF1158	N4-(beta-N-acetylglucosaminyl)-L-asparaginase, putative		X	3			EF1158-EF1161	0.0241646	0.942041	0.276568	0.266867	-0.871658	0.00538947	0.352803	0.126419	-0.491324	0.020251
EF1364	acetyl-CoA acetyltransferase/hydroxymethylglutaryl-CoA reductase, degradative		I	3	2.3.1.9	K00054	EF1364	-0.102464	0.343306	0.276276	0.00372572	-0.265545	0.00189173	0.24668	0.00240008	-0.130847	0.0969401
EF2748	basic membrane protein DtlB	dtlB	M	4		K03739	EF2746-EF2750	-0.0701136	0.363907	0.274892	0.00283636	-0.346565	3.34644e-10	-0.192442	0.0111448	-0.205959	0.00481022
EF0770	conserved hypothetical protein		O	4			EF0770	0.0253807	0.823156	0.274379	0.00980472	0.13176	0.400784	-0.282577	0.000205439	0.215623	0.00770518
EF2421	threonine synthase	thrC	E	3	4.2.99.2	K01733	EF2420-EF2422	-0.0606282	0.721418	0.273681	0.101402	0.325306	0.0503453	0.0589401	0.530388	0.581465	2.11404e-13
EF0920	conserved hypothetical protein		X	5			EF0919-EF0920	0.0193215	0.793025	0.272985	9.43604e-05	-0.167714	0.00484548	-0.0905402	0.281366	-0.0939414	0.229551
EF3165	maf protein	maf	D	4		K06287	EF3165	0.0614908	0.599519	0.27223	0.00921027	0.145636	0.102854	0.421371	6.80107e-06	0.110757	0.208249
EF2401	acylphosphatase	acyP	C	3	3.6.1.7	K01512	EF2401	-0.11777	0.277996	0.270051	0.0112879	0.0916376	0.238751	-0.257763	0.0297551	0.432398	3.70382e-05
EF1689	hypothetical protein		X	5			EF1689-EF1691	-0.16631	0.0893389	0.268991	0.0236725	0.487137	3.07437e-09	0.295349	5.14239e-05	0.596339	2.9601e-18
EF2205	conserved hypothetical protein		X	5			EF2205	-0.223899	0.0248444	0.268609	0.0370977	-0.315199	0.00283352	0.20789	0.112142	-0.0252274	0.843583
EF2147	hypothetical protein		X	5			EF2147	0.305128	0.112964	0.265643	0.235597	0.742424	6.72584e-07	0.148855	0.475515	-0.123776	0.487537
EF2587	inosine-uridine preferring nucleoside hydrolase		F	3	3.2.2.1	K01239	EF2587-EF2588	0.158845	0.195048	0.265541	0.0104145	-0.645471	1.8256e-11	0.0588235	0.521675	-0.647163	8.45048e-18
EF3197	sensor histidine kinase		T	1		K07704	EF3193-EF3197	-0.0953576	0.224285	0.265204	7.65607e-05	0.51171	5.47775e-10	-0.0515515	0.537342	0.654409	2.70124e-18
EF1979	ATPase, AAA family		L	1		K07478	EF1979	0.368887	3.54084e-06	0.264748	0.000377112	-0.540295	6.58509e-18	0.828893	1.30452e-27	-0.788475	5.41731e-26
EF1522	RNA polymerase sigma-43 factor	sigA	K	1		K03086	EF1521-EF1522	-0.0124067	0.9445	0.264496	0.127728	-0.0781363	0.646256	0.486446	1.74196e-06	-0.176531	0.0375266
EF1303	transcriptional regulator, LysR family		K	1			EF1303	0.374881	0.0064626	0.26446	0.0637864	-0.105021	0.411298	-0.395587	0.0105871	-0.573834	1.37067e-05
EF0867	glyoxalase family protein		E	3			EF0867	0.211031	0.0896641	0.26345	0.0358919	0.187757	0.139801	-0.305982	0.0196587	-0.0489083	0.688661
EF2703	transcriptional regulator		K	1			EF2703	0.157504	0.27229	0.263409	0.0859077	0.848532	3.47625e-11	0.646906	2.66287e-06	0.522846	2.03661e-05
EF0868	S-adenosylmethionine:tRNA ribosyltransferase-isomerase	queA	X	5	5.-.-.-	K07568	EF0868	-0.11151	0.259046	0.26085	0.00317566	-0.374072	5.05768e-06	0.150262	0.0439842	-0.217339	0.00226762
EF1000	conserved hypothetical protein		S	4		K02221	EF0988-EF1002	0.340796	6.75412e-06	0.260139	0.000348961	0.26443	1.18521e-05	-0.0164187	0.843381	-0.253319	0.00110491
EF3290	sensor histidine kinase		T	2	2.7.3.-		EF3289-EF3290	-0.0469411	0.649718	0.25981	0.0100927	0.321779	0.000343157	0.507465	5.38107e-12	0.297385	8.51001e-05
EF1765	competence protein F	comFC	R	5		K02242	EF1765	0.204549	0.606542	0.25971	0.469912	0.82913	0.00663548	0.329333	0.303013	0.668837	0.0229097
EF1213	acetolactate synthase, catabolic	alsS	EH	4	2.2.1.6	K01652	EF1213-EF1214	0.158329	0.102532	0.259675	0.00318096	0.0340395	0.681701	-0.627182	2.93536e-19	-0.0432917	0.558126
EF0273	phosphoglycerate mutase family protein		G	3		K15634	EF0273	0.176068	0.351005	0.259247	0.142526	-0.405948	0.0365746	0.397195	0.055757	-0.812759	2.30803e-05
EF2931	valyl-tRNA synthetase	valS	J	1	6.1.1.9	K01873	EF2931	-0.0882512	0.620654	0.258688	0.182648	-0.497041	0.00868959	0.157105	0.132996	-0.258974	0.000877023
EF0807	pheromone binding protein, putative		E	5		K15580	EF0807-EF0809	-0.209446	0.0334126	0.257593	0.00358628	0.263987	0.00125473	-0.0545916	0.48442	0.630025	1.1061e-17
EF0395	methionine synthase, putative		E	3		K00549	EF0395	-0.217465	0.0364946	0.257376	0.00421682	-0.719761	6.25319e-17	0.343767	1.51208e-05	-0.36324	2.17427e-06
EF1237	conserved hypothetical protein		R	3			EF1232-EF1240	0.202182	0.551669	0.257319	0.417183	0.426471	0.0935544	0.501919	0.0680706	-0.0773909	0.822326
EF3111	acyl carrier protein	acpP	IQ	1		K02078	EF3111-EF3115	-0.058492	0.504019	0.255031	0.00137187	-0.0263083	0.66168	0.54727	6.38265e-12	-0.00335694	0.968185
EF1407	hypothetical protein		X	5			EF1407	-0.353424	0.152052	0.254973	0.252465	0.349595	0.0620862	0.595127	0.0137909	0.908355	4.18689e-05
EF2549	uracil phosphoribosyltransferase	upp	F	3	2.4.2.9	K00761	EF2549-EF2550	-0.568134	0.00431763	0.254632	0.174704	-0.4671	0.0105651	0.578046	6.93977e-07	0.0361158	0.768321
EF0936	dimethyladenosine transferase	ksgA	J	1	2.1.1.-	K02528	EF0934-EF0936	0.0965153	0.339328	0.254626	0.00673359	-0.00128148	0.991679	0.0324595	0.667853	-0.136226	0.058511
EF0302	aminopeptidase C	pepC	E	3	3.4.22.40	K01372	EF0302	-0.268599	0.151986	0.252371	0.172894	0.0539146	0.768768	0.135876	0.180655	0.368849	6.03478e-06
EF3158	hydrolase, haloacid dehalogenase-like family		R	3		K01838	EF3157-EF3158	0.18946	0.0580719	0.24994	0.00545545	0.373918	8.39133e-06	0.31759	8.02725e-05	0.11135	0.144479
EF0786	tributyrin esterase, putative		R	5		K03930	EF0786	-0.266158	0.00982937	0.24929	0.0120535	-0.295158	0.000831702	0.342528	3.14462e-06	-0.0379479	0.575159
EF2593	ABC transporter, ATP-binding/permease protein		V	4		K06147	EF2592-EF2594	-0.0944039	0.540747	0.248593	0.00799984	-0.152028	0.0520455	0.0015778	0.998997	-0.111275	0.437651
EF0274	conserved hypothetical protein		R	5			EF0274	0.148253	0.109717	0.248101	0.00694123	0.535168	8.54507e-14	-0.151416	0.168013	0.1993	0.0265352
EF1681	peptide methionine sulfoxide reductase	msrA	X	5	1.8.4.6	K07304	EF1678-EF1684	0.0224192	0.831323	0.247957	0.00883353	0.145525	0.0832318	0.403384	2.99023e-07	0.28921	0.000232837
EF3042	PTS system, IID component		X	5		K02747	EF3042-EF3044	-0.125004	0.637099	0.247387	0.405326	0.252478	0.303861	-0.130189	0.723909	-0.0734399	0.831348
EF0827	oxidoreductase, Gfo/Idh/MocA family		R	5			EF0827	-0.278188	0.00186942	0.24669	0.00265728	-0.282569	0.000441455	-0.0387077	0.693969	0.0685343	0.465055
EF1244	oxidoreductase, Gfo/Idh/MocA family		R	5			EF1243-EF1244	-0.0527625	0.501604	0.246636	0.00780666	0.0600842	0.47304	0.172059	0.0283229	0.201729	0.0044487
EF2610	ATP synthase F1, alpha subunit	atpA	C	3	3.6.3.14	K02111	EF2607-EF2614	0.216925	0.25625	0.245939	0.180182	-0.222703	0.21898	-0.00953994	0.934758	-0.303738	0.00121104
EF1941	hypothetical protein		X	5			EF1941	0.012761	0.874887	0.245725	0.00452099	0.742896	2.98445e-33	-0.375501	5.76964e-05	0.723452	2.06973e-21
EF0697	conserved hypothetical protein		J	1		K07586	EF0697	-0.573608	0.0775958	0.245557	0.430195	0.259444	0.402151	0.48509	6.86566e-05	0.468061	0.00111434
EF3081	pheromone binding protein		E	3		K15580	EF3081	0.0286842	0.78531	0.24334	0.0058294	-0.107905	0.163853	-0.201233	0.0828282	-0.0513927	0.605472
EF1505	conserved hypothetical protein		R	5		K06889	EF1505	-0.17165	0.102651	0.241917	0.00603595	0.283612	0.000648792	-0.183921	0.020919	0.399451	7.62417e-07
EF2615	hypothetical protein		X	5			EF2615	0.237703	0.0320243	0.2418	0.0403837	-0.477644	4.71892e-08	0.255832	0.0161703	-0.70858	8.66915e-11
EF2472	O-sialoglycoprotein endopeptidase	gcp	O	4	3.4.24.57	K01409	EF2472-EF2475	-0.190083	0.0790564	0.24085	0.0111276	0.128655	0.141462	0.426942	1.47026e-07	0.182407	0.031011
EF1202	conserved hypothetical protein		X	5			EF1202-EF1204	-0.0380118	0.694707	0.239433	0.0155704	-0.462572	4.28069e-08	-0.108735	0.142682	-0.192	0.00496533
EF2405	hypothetical protein		X	5			EF2405-EF2407	-0.0267535	0.813818	0.239092	0.0107024	-0.424412	5.72096e-07	0.252835	0.0176396	-0.265839	0.00970996
EF2592	ABC transporter, ATP-binding/permease protein		V	4		K06147	EF2592-EF2594	-0.112734	0.311843	0.237138	0.00105957	-0.0292865	0.659531	0.311758	0.00643239	0.0172361	0.883225
EF0885	conserved hypothetical protein		X	5			EF0884-EF0890	0.0945912	0.419063	0.236105	0.0337873	-0.0250723	0.791466	0.458165	1.81287e-06	-0.120215	0.238539
EF0882	replication initiation and membrane attachment protein DnaB, putative		L	1		K03346	EF0881-EF0883	0.0234358	0.892107	0.234432	0.164056	0.254655	0.129421	0.0181839	0.854667	0.412987	1.19979e-06
EF2979	PTS system, IIB component		X	3		K17465	EF2975-EF2981	-0.124619	0.719622	0.230643	0.588621	-0.196765	0.55727	0.175387	0.628874	0.0153847	1
EF1367	cold-shock domain family protein		X	5		K03704	EF1367	0.0603276	0.755578	0.228913	0.233872	-0.136744	0.476122	0.582322	5.21128e-06	-0.277357	0.0260897
EF3201	OsmC/Ohr family protein		O	4			EF3201	-0.569876	1.576e-05	0.228127	0.0461538	-0.343123	0.00136805	0.301365	0.0425144	0.150194	0.344315
EF0744	sodium/dicarboxylate symporter family protein		R	5		K06956	EF0744	-0.364927	0.00298501	0.227937	0.024527	-0.143706	0.160438	0.837592	3.07267e-16	-0.286671	0.00620461
EF0912	peptide ABC transporter, ATP-binding protein		E	3		K10823	EF0909-EF0912	-0.161906	0.399097	0.22758	0.235385	0.0945192	0.591761	0.34615	0.00097937	0.337185	4.7838e-05
EF3131	conserved hypothetical protein TIGR00255		S	5			EF3130-EF3132	-0.169703	0.0899358	0.227462	0.012897	-0.0509494	0.545747	-0.014782	0.844452	0.163464	0.0183057
EF2858	threonyl-tRNA synthetase	thrS	J	1	6.1.1.3	K01868	EF2858	-0.0969579	0.615508	0.226852	0.236327	0.198631	0.262785	0.228758	0.0264869	0.391188	7.55443e-07
EF1001	S4 domain protein		S	4			EF0988-EF1002	0.130937	0.121112	0.225607	0.00272702	0.587718	5.36994e-25	0.196504	0.0192098	0.21836	0.00691381
EF2612	ATP synthase F0, B subunit	atpF	C	3	3.6.3.14	K02109	EF2607-EF2614	0.226947	0.18257	0.223127	0.176088	-0.340237	0.0314311	-0.021199	0.825684	-0.490191	1.71014e-10
EF0812	glucuronyl hydrolase, putative		R	3		K18581	EF0812-EF0813	-0.0787083	0.658188	0.222882	0.2114	0.19148	0.255604	0.28553	0.0436599	0.476607	0.000324643
EF1313	conserved hypothetical protein		X	1		K03095	EF1312-EF1313	0.217597	0.0336108	0.22094	0.0202516	-0.377226	3.68991e-11	0.166372	0.0314682	-0.492298	9.14837e-11
EF1154	DNA replication protein DnaD, putative		L	1		K02086	EF1154-EF1155	-0.0770715	0.440558	0.217942	0.0280669	-0.172568	0.0389325	-0.0163014	0.842701	-0.000966978	0.991296
EF1968	conserved hypothetical protein		S	5			EF1967-EF1969	-0.394516	7.11278e-06	0.217139	0.0249091	-0.394601	1.68894e-09	0.705411	2.41122e-17	-0.244644	0.00269506
EF2743	conserved domain protein		S	3			EF2743-EF2744	-0.311156	0.010404	0.217077	0.0174829	-0.247674	0.00298566	0.683572	3.52318e-11	0.177007	0.0672106
EF2394	ABC transporter, ATP-binding protein		O	3		K09013	EF2388-EF2394	1.94033	4.60361e-83	0.215701	0.00133334	0.855394	7.98195e-49	-0.439675	1.96047e-10	-0.898158	2.18441e-39
EF3115	conserved hypothetical protein		X	1			EF3111-EF3115	-0.137151	0.239711	0.215369	0.0202969	-0.324574	0.000166478	0.0829423	0.387976	-0.260736	0.00477255
EF2754	anaerobic ribonucleoside-triphosphate reductase	nrdD	F	3	1.17.4.2	K21636	EF2754-EF2755	-0.141767	0.44221	0.214726	0.243994	-0.255805	0.149593	0.696657	1.56004e-11	-0.26508	0.000932303
EF0251	transcriptional regulator, putative		X	1		K07105	EF0249-EF0251	-0.190806	0.0125632	0.214087	0.0196278	0.193887	0.021244	0.391401	1.46109e-07	0.474782	1.16953e-10
EF0289	cysteine synthase B, putative		E	3		K01738	EF0289-EF0290	-1.0117	3.19359e-31	0.213756	0.0186163	-0.818615	1.07926e-50	0.19811	0.0237347	-0.053633	0.517821
EF3270	glutathione reductase	gor	C	3	1.6.4.2	K00383	EF3270	-0.0403566	0.683605	0.213515	0.025798	0.0953944	0.249315	0.0149324	0.838546	0.0885175	0.217677
EF2749	D-alanine-activating enzyme, putative		Q	4		K03367	EF2746-EF2750	-0.130281	0.179215	0.212454	0.0187715	-0.492471	2.59551e-09	-0.158286	0.0293705	-0.171925	0.0172437
EF3254	1,4-dihydroxy-2-naphthoate octaprenyltransferase, putative		H	4			EF3254-EF3255	0.420492	0.0184305	0.212049	0.0372897	-0.401253	4.54104e-06	0.124992	0.271536	-0.901055	4.3679e-21
EF3054	lipoprotein, putative		S	5			EF3054	-0.324091	0.000219197	0.210316	0.00791805	0.48247	2.64888e-07	-0.0564021	0.501232	0.8889	4.64539e-34
EF0748	rhodanese family protein		R	5		K07146	EF0748	0.0271317	0.76525	0.21023	0.00109111	-0.151132	0.00516389	-0.192451	0.0365536	-0.355488	3.35481e-05
EF0716	conserved hypothetical protein		X	5			EF0716	0.0884718	0.291043	0.210066	0.00340201	-0.707044	1.79509e-27	0.342121	2.03715e-05	-0.722915	1.1987e-21
EF0414	oxidoreductase, DadA family		E	3			EF0414	-0.00800959	0.946866	0.20964	0.0235924	0.354486	3.51702e-05	-0.0812524	0.360017	0.400807	3.62618e-07
EF1112	exonuclease RexB	rexB	L	1		K16899	EF1112-EF1113	0.268749	0.0173261	0.209418	0.0171093	0.00363677	0.964242	0.490431	2.35566e-07	-0.178533	0.0220483
EF1699	transcriptional regulator, MerR family		K	1			EF1699	0.00604818	0.97012	0.208911	0.0949191	0.192999	0.0352202	0.270996	0.0358372	0.410012	0.000299204
EF0658	conserved hypothetical protein		E	3			EF0657-EF0658	0.107393	0.25926	0.208228	0.00600485	-0.832631	2.13293e-38	0.0634149	0.530733	-0.828247	1.88583e-16
EF3208	ABC transporter, permease protein		X	4		K01992	EF3208-EF3209	-0.0280463	0.775734	0.206775	0.050399	0.420019	1.34643e-08	0.535708	4.82551e-06	0.362357	0.00109889
EF2982	phosphoglycerate mutase family protein		G	3		K15634	EF2982	-0.0393843	0.718896	0.204939	0.0302634	0.202785	0.0214402	0.128896	0.210526	0.341339	0.000378682
EF2586	cobyric acid synthase, putative		R	4		K07009	EF2585-EF2586	-0.040302	0.653381	0.204463	0.0100415	0.443298	3.41558e-09	0.49877	2.24546e-09	0.334893	8.71551e-05
EF2433	phosphoglycerate mutase family protein		G	3		K15634	EF2433	-0.0627779	0.426702	0.204431	0.0050579	-0.030475	0.620742	0.540767	1.46308e-09	-0.0279879	0.76234
EF3319	citrate lyase, alpha subunit	citF	C	3	4.1.3.6	K01643	EF3317-EF3326	-0.100825	0.23584	0.203996	0.006553	-0.385268	9.258e-09	0.545878	5.1559e-10	-0.289773	0.000704126
EF3166	DNA mismatch repair protein HexB	hexB	L	1		K03572	EF3166-EF3172	0.0680208	0.709253	0.203519	0.22441	0.192956	0.245353	0.189903	0.112292	0.186564	0.070521
EF0459	glucokinase regulator-related protein		R	5		K07106	EF0455-EF0461	-0.0426096	0.678424	0.203477	0.0452204	-0.0812273	0.335759	-0.0758059	0.509367	0.23631	0.0101458
EF0419	conserved hypothetical protein		X	5			EF0419-EF0420	0.192633	0.0730883	0.203473	0.00115416	-0.209633	0.000206994	-0.151481	0.0899553	-0.318975	0.000193513
EF2675	competence protein, putative		R	3		K06198	EF2674-EF2675	-0.348795	0.0865158	0.203296	0.300921	-0.21624	0.203167	-0.131277	0.50513	-0.140612	0.411185
EF3008	conserved hypothetical protein		TQ	4			EF3008	0.354466	0.129116	0.202602	0.435545	0.935125	1.34447e-06	-0.337592	0.101319	0.309399	0.0639452
EF0062	5-nucleotidase family protein		F	3			EF0062	0.113862	0.277013	0.202525	0.0308575	0.406262	1.10352e-06	-0.20083	0.0102599	0.307003	0.000195211
EF0004	DNA replication and repair protein RecF	recF	L	1		K03629	EF0003-EF0006	0.0757077	0.362541	0.201987	0.00625482	-0.888364	3.21246e-37	0.475374	3.61442e-10	-0.885161	4.7789e-27
EF1724	CBS domain protein		X	4			EF1723-EF1724	0.221408	0.0230551	0.201329	0.0256318	0.828288	6.48022e-24	0.0477768	0.503006	0.598804	8.69628e-18
EF0840	carbohydrate kinase, pfkB family		G	5		K00874	EF0835-EF0840	-0.0789519	0.515871	0.20036	0.135483	0.145006	0.13596	0.488323	8.19253e-05	0.253723	0.0231366
EF1677	lipoprotein, putative		X	5			EF1677	0.0794833	0.442612	0.19962	0.0231526	-0.357448	6.45318e-06	-0.291708	0.0066827	-0.136412	0.191128
EF0676	arginine repressor	argR	K	1		K03402	EF0676	-0.35054	0.000104887	0.198219	0.0193317	-0.772997	5.00081e-24	0.00545637	0.955648	-0.149561	0.0596413
EF0897	preprotein translocase, YajC subunit, putative		U	1		K03210	EF0896-EF0897	-0.451331	0.00304168	0.196688	0.251682	-0.47315	8.62762e-05	0.48492	1.5504e-06	-0.0763244	0.501022
EF0246	amino acid ABC transporter, ATP-binding protein		E	3		K17076	EF0246-EF0247	-0.0738032	0.4509	0.196006	0.0399579	0.088947	0.286679	0.361892	4.24066e-07	0.105308	0.148658
EF1917	ATP-dependent Clp protease, ATP-binding subunit ClpX	clpX	O	4		K03544	EF1916-EF1917	0.127858	0.485057	0.195894	0.265956	-0.0108095	0.950708	0.403882	0.000131672	-0.165095	0.0638106
EF1961	enolase	eno	G	3	4.2.1.11	K01689	EF1961	0.00303935	0.987872	0.195294	0.325472	-0.653565	0.000850978	0.24981	0.0325557	-0.377715	7.04681e-06
EF1555	YitT family protein		S	5			EF1555	-0.197281	0.0127143	0.194644	0.00959	0.145134	0.00848042	0.0208025	0.793492	0.361148	6.14001e-06
EF1678	signal peptidase I		U	5		K03100	EF1678-EF1684	-0.0659577	0.437676	0.194173	0.0312097	0.556699	3.58991e-18	0.309819	0.000311284	0.71014	3.14054e-19
EF2422	homoserine dehydrogenase	hom	E	3	1.1.1.3	K00003	EF2420-EF2422	-0.00824258	0.961897	0.193966	0.252402	0.39923	0.0195044	-0.242763	0.00920316	0.590141	2.63117e-12
EF2986	ABC transporter, ATP-binding protein		V	4		K02003	EF2985-EF2987	0.0226172	0.886801	0.193858	0.157287	0.112609	0.36131	-0.794558	1.57069e-07	0.0663458	0.606736
EF2727	phosphosugar-binding transcriptional regulator, putative		K	1			EF2727	-0.002543	1	0.192685	0.204681	0.496404	0.000121547	-0.495287	0.00638788	0.351458	0.0315241
EF3093	conserved hypothetical protein		X	5		K09705	EF3093	0.0575988	0.506602	0.192503	0.0181542	-0.565773	1.75702e-14	0.397166	1.19021e-05	-0.40475	2.51472e-06
EF2746	dltD protein	dltD	M	4		K03740	EF2746-EF2750	-0.0483743	0.639321	0.191555	0.0623625	-0.41325	5.04854e-06	0.121774	0.106323	-0.293834	1.00674e-05
EF0471	ribonucleoside-diphosphate reductase 2, alpha subunit	nrdE	F	3		K00525	EF0470-EF0473	0.307902	0.111057	0.191209	0.295502	-0.177619	0.318917	0.452402	5.76626e-05	-0.891424	3.48935e-22
EF0778	hypothetical protein		X	5			EF0778-EF0780	-0.370648	0.0146348	0.191176	0.25024	0.56175	1.69363e-11	0.112088	0.620335	0.490973	0.000455976
EF1511	mandelate racemase/muconate lactonizing enzyme family protein		MR	3		K19802	EF1511-EF1513	0.6736	0.0400264	0.190603	0.620676	0.555429	0.0749428	-0.368382	0.296055	0.365288	0.152339
EF2775	phosphomethylpyrimidine kinase	thiD	H	4	2.7.4.7	K00941	EF2775-EF2778	0.0898998	0.551986	0.190402	0.0813851	-0.0803323	0.397478	0.018744	0.911231	-0.0205204	0.888221
EF3094	signal recognition particle-docking protein FtsY	ftsY	U	4		K03110	EF3094-EF3097	-0.0452996	0.795506	0.190225	0.260315	-0.801994	5.68429e-07	0.168805	0.098994	-0.616143	7.75602e-14
EF2217	alpha-1,2-mannosidase, putative		G	3			EF2217	0.487945	0.000101385	0.190197	0.142969	0.69478	2.28499e-12	0.0658544	0.59205	0.270699	0.0200957
EF1200	membrane protein, putative		S	5			EF1200-EF1201	-0.044461	0.735792	0.190105	0.187827	0.818253	8.54018e-15	0.547772	2.40225e-06	0.842322	1.80084e-13
EF3333	ribosomal protein L34	rpmH	X	4		K02914	EF3330-EF3333	0.151763	0.20385	0.189992	0.0802681	-0.478906	1.37527e-06	0.390281	0.00128178	-0.743216	7.84422e-09
EF1301	cell division protein, FtsW/RodA/SpovE family		X	5		K05837	EF1300-EF1301	0.6074	4.85275e-05	0.189049	0.289512	0.977573	2.03308e-13	0.00470211	1	-0.110451	0.498376
EF2588	conserved hypothetical protein		X	3		K16923	EF2587-EF2588	0.118387	0.26158	0.188647	0.0724091	-0.643696	3.33112e-11	0.0300611	0.674574	-0.594389	1.14177e-17
EF0674	glycine betaine/carnitine/choline ABC transporter, ATP-binding protein		E	3		K05847	EF0674-EF0675	0.158726	0.0565007	0.18813	0.0177932	0.142403	0.0180189	-0.338769	0.00041574	-0.0277612	0.745598
EF1382	peptidase T	pepT-1	E	5		K01258	EF1380-EF1382	-0.137226	0.435426	0.187617	0.276425	-0.358231	0.0323621	0.145661	0.129564	-0.159447	0.0357343
EF3049	phosphosugar-binding transcriptional regulator, RpiR family, putative		K	1			EF3049	0.104946	0.31618	0.185567	0.098547	0.967725	2.47105e-42	-0.396105	0.00126374	0.68406	2.96413e-10
EF1786	phosphoribosylaminoimidazole carboxylase, ATPase subunit	purK-1	F	3	4.1.1.21	K01589	EF1777-EF1786	0.28416	0.00313203	0.185113	0.0706298	0.577658	7.33629e-12	-0.289289	0.00994614	0.426898	4.90303e-07
EF0467	MgtC family protein		S	5		K07507	EF0467	-0.188017	0.0822436	0.184405	0.0614665	0.616887	1.25969e-13	0.370838	0.000541355	0.687647	1.23836e-13
EF0862	glycine betaine/carnitine/choline ABC transporter, permease protein		E	3		K05846	EF0862-EF0865	-0.0811634	0.640981	0.183881	0.282205	0.347144	0.0391177	0.62396	2.16369e-09	0.481317	1.08317e-07
EF2479	conserved hypothetical protein		R	5		K06872	EF2477-EF2479	0.0109343	0.911297	0.182538	0.0158521	-0.0112037	0.878472	0.105685	0.299786	0.102091	0.283673
EF2213	PTS system, IIBC components		G	3	2.7.1.69	K02818	EF2213	0.0100663	0.928625	0.181457	0.0418453	-0.285397	0.000335134	0.241163	0.0124536	-0.347056	0.000288465
EF0468	LemA family protein		X	5		K03744	EF0468-EF0469	-0.192344	0.0253976	0.18028	0.0632461	-0.0883257	0.245995	-0.466337	2.79124e-06	0.649694	2.95689e-12
EF0374	lipoprotein, putative		X	5			EF0374	0.129204	0.593523	0.18023	0.479316	0.0870265	0.705573	-0.196864	0.572563	-0.133245	0.592361
EF2234	sugar ABC transporter, sugar-binding protein, putative		G	3		K02027	EF2234	0.385506	0.326114	0.179473	0.767011	0.24873	0.552102	0.580672	0.0488924	-0.164911	0.653402
EF0857	conserved hypothetical protein		X	5			EF0857	-0.275332	0.00101422	0.179237	0.00799978	-0.576748	1.87045e-22	0.537099	3.64701e-09	-0.304467	0.000401048
EF3296	GTP-binding protein, GTP1/OBG family		J	1		K06942	EF3296-EF3297	-0.0493627	0.776201	0.177766	0.298171	-0.644268	6.84896e-05	0.0476252	0.613393	-0.500428	1.9795e-11
EF1962	triosephosphate isomerase	tpiA	G	3	5.3.1.1	K01803	EF1962-EF1965	0.0704999	0.717709	0.177549	0.358217	-0.544266	0.00419274	0.166518	0.161327	-0.25833	0.00250962
EF0958	PTS system, IIABC components		G	3	2.7.1.69	K02777	EF0958	-0.345843	0.0249497	0.176665	0.370554	0.441858	0.00046045	0.955998	4.0915e-08	0.724563	1.29146e-08
EF1644	lacX protein, putative		G	4			EF1644-EF1648	0.0155426	0.876779	0.176117	0.0547168	0.427534	2.97732e-07	0.165917	0.0315965	0.348454	1.81392e-06
EF2594	transcriptional regulator, TetR family		K	4			EF2592-EF2594	0.104666	0.508467	0.17452	0.29984	-0.359456	0.0072513	-0.0777734	0.558975	-0.556541	6.44497e-05
EF2484	conserved hypothetical protein		R	5			EF2484	-0.171977	0.0883879	0.174209	0.124549	-0.808299	8.90613e-18	-0.282815	0.0149793	-0.618274	1.36052e-09
EF2575	carbamate kinase	arcC-4	E	3	2.7.2.2	K00926	EF2575-EF2576	0.42143	0.0808742	0.174024	0.521482	0.952223	1.72946e-06	0.0241969	1	0.263599	0.236505
EF2651	spermidine/putrescine ABC transporter, permease protein		ER	3		K11071	EF2649-EF2653	0.00781082	0.963117	0.173917	0.176994	-0.567534	5.89024e-07	-0.254328	0.0320635	-0.7847	7.05553e-12
EF0446	O-succinylbenzoic acid--CoA ligase, putative		IQ	3		K01911	EF0446	-0.023938	0.810454	0.173872	0.0486496	-0.687089	1.22028e-16	-0.0582965	0.445792	-0.638185	1.16158e-15
EF1101	conserved hypothetical protein		X	5			EF1101	0.107104	0.392286	0.173779	0.163608	0.0869636	0.394998	-0.183098	0.183861	-0.102747	0.410543
EF1730	EbsC protein		S	5		K03976	EF1730-EF1731	0.0333539	0.668843	0.173018	0.0198406	-0.0798359	0.234019	0.128143	0.1086	-0.246742	0.00101894
EF2750	conserved hypothetical protein		X	4			EF2746-EF2750	-0.47709	0.000468239	0.172945	0.336866	-0.603442	1.24089e-06	-0.133696	0.490737	-0.272678	0.0511354
EF1416	glucose-6-phosphate isomerase	pgi	G	3	5.3.1.9	K01810	EF1416	-0.229918	0.224514	0.172187	0.362343	-0.742532	6.73423e-05	0.0150779	0.887987	-0.400809	8.70845e-07
EF1243	glycosyl hydrolase, family 1		X	5		K01223	EF1243-EF1244	0.133126	0.14948	0.171708	0.0434058	0.231379	0.00260412	-0.156244	0.0564281	0.0931019	0.241531
EF1229	conserved hypothetical protein		X	5			EF1228-EF1230	-0.249143	0.0094828	0.171608	0.0635514	0.165414	0.0263321	-0.0754288	0.488538	0.212268	0.0209506
EF2708	membrane protein, putative		S	5			EF2708	-0.0321349	0.853417	0.171009	0.326696	0.307684	0.0703901	0.27354	0.00588815	0.51538	2.44123e-08
EF1008	oxidoreductase, Gfo/Idh/MocA family		R	1			EF1008-EF1010	0.0577055	0.569145	0.170991	0.0704802	-0.086669	0.312886	-0.27017	0.000354372	-0.0393067	0.590934
EF0379	death-on-curing family protein		R	5		K07341	EF0379-EF0380	-0.0203531	0.846378	0.169657	0.0713198	0.49361	1.17417e-10	0.00523491	0.966145	0.509612	2.70895e-08
EF2424	pyrroline-5-carboxylate reductase, putative		E	3		K00286	EF2424	0.0680735	0.483386	0.168469	0.0974898	0.159049	0.0593458	0.248682	0.000838614	0.213568	0.00271693
EF0389	membrane protein, putative		X	5			EF0389-EF0390	0.191506	0.473025	0.16609	0.634502	0.378273	0.144117	0.0335129	0.954652	-0.0540394	0.832153
EF3113	ATP-dependent DNA helicase RecG	recG	LK	1	3.6.1.-	K03655	EF3111-EF3115	-0.0452543	0.654369	0.165994	0.0638285	-0.682714	3.96953e-16	0.421055	5.9664e-08	-0.759075	3.66548e-23
EF2613	ATP synthase F0, C subunit	atpE	C	3	3.6.3.14	K02110	EF2607-EF2614	0.213977	0.0254336	0.16583	0.0579704	-0.457987	5.71742e-08	0.178303	0.0128018	-0.522466	4.92412e-13
EF2638	DNA-binding protein, putative		R	5		K01926	EF2638	0.134485	0.175196	0.16487	0.0726752	-0.408239	2.294e-06	-0.602532	1.35447e-17	-0.717492	4.58929e-23
EF3199	ABC transporter, permease protein		P	2		K02072	EF3198-EF3200	0.00778585	0.957552	0.16472	0.144046	0.78664	1.50266e-20	0.74752	1.32002e-09	0.626317	3.87795e-07
EF2736	exonuclease		L	1		K02342	EF2735-EF2736	-0.0613447	0.59042	0.164073	0.150224	0.755226	2.30812e-15	0.586819	1.8028e-10	0.648901	1.10992e-15
EF1692	conserved hypothetical protein		X	5			EF1692	0.0300589	0.756424	0.161588	0.0705154	-0.477672	1.30842e-08	-0.102097	0.167428	-0.385154	2.3874e-07
EF2762	DNA polymerase III, delta prime subunit	holB	L	5	2.7.7.7	K02341	EF2757-EF2764	0.0662683	0.517222	0.158768	0.0936365	0.549116	4.19708e-08	0.328751	0.000225779	0.489442	1.87569e-09
EF0034	conserved hypothetical protein		S	5			EF0033-EF0035	0.1022	0.451422	0.158242	0.264773	0.626154	1.48954e-08	0.280383	0.0514953	0.511249	4.95115e-06
EF2063	transcriptional regulator, AraC family		S	5		K13653	EF2063	0.00239048	0.984902	0.157688	0.0828794	0.0302195	0.716125	-0.0672975	0.504307	0.0750108	0.454749
EF1114	conserved hypothetical protein		K	1			EF1114	0.0832121	0.407404	0.157308	0.172689	-0.266281	2.17579e-06	0.573466	2.51441e-12	-0.264696	0.000413317
EF1146	DNA-directed RNA polymerase, delta subunit, putative		K	1		K03048	EF1146-EF1147	0.0950822	0.597324	0.157171	0.374682	-0.424445	0.0136786	0.0310006	0.75276	-0.513799	2.84067e-11
EF1619	carbon dioxide concentrating mechanism protein CcmL, putative		X	5		K04028	EF1617-EF1622	-0.244154	0.432588	0.156268	0.606932	-0.571123	0.0480481	0.388499	0.170306	-0.198917	0.479158
EF1794	conserved hypothetical protein		X	5			EF1794	0.0813314	0.301009	0.156241	0.0406162	0.0680196	0.271064	-0.225558	0.0109338	-0.139056	0.0831004
EF0290	cystathionine beta-lyase	metC	E	3	4.4.1.8	K01760	EF0289-EF0290	-0.946462	4.42508e-17	0.15623	0.135709	-0.168542	0.0885186	0.553526	1.34413e-10	0.138845	0.107284
EF0275	ada regulatory protein, putative		F	3		K13530	EF0275	0.0885877	0.391093	0.154936	0.151068	0.797839	1.78472e-22	-0.083253	0.509819	0.655282	1.05414e-10
EF2496	pheromone cOB1 precursor/lipoprotein, YaeC family		P	2		K02073	EF2496-EF2498	-0.0129461	0.892285	0.154837	0.0854858	-0.636004	2.74374e-14	0.197139	0.00388436	-0.49939	4.87779e-13
EF0914	translation initiation factor IF-3	infC	J	5		K02520	EF0914-EF0916	0.148499	0.384926	0.15424	0.350257	0.131796	0.426714	0.457127	5.09984e-06	-0.0862651	0.291632
EF1349	glycosyl hydrolase, family 13		X	5		K01187	EF1346-EF1349	-0.232604	0.0842936	0.153417	0.357752	-0.292369	0.0145775	0.441356	0.000970846	-0.25754	0.0286075
EF1160	PTS system, cellobiose-specific IIC component		G	3		K02761	EF1159-EF1161	0.392181	0.0449168	0.15301	0.473928	-0.00816819	0.971131	0.144173	0.481356	-0.420493	0.0146318
EF1121	glutamate racemase	murI	M	3	5.1.1.3	K01776	EF1121-EF1123	-0.0163757	0.872111	0.152742	0.111016	0.174459	0.0405196	-0.418027	2.43836e-07	0.196201	0.00581838
EF2614	ATP synthase F0, A subunit	atpB	X	3	3.6.3.14	K02108	EF2607-EF2614	0.164709	0.369081	0.151631	0.404371	-0.455702	0.00898605	0.130755	0.184677	-0.609806	7.58634e-15
EF1521	DNA primase	dnaG	L	1	2.7.7.-	K02316	EF1521-EF1522	0.118134	0.303329	0.150876	0.159373	0.131332	0.408929	0.244017	0.0150388	-0.172698	0.0282205
EF1743	proline dipeptidase	pepQ-2	E	3	3.4.13.9	K01271	EF1743	-0.0264038	0.878548	0.149347	0.377313	0.13244	0.426148	0.075284	0.449823	0.305538	7.87987e-05
EF1171	ribosomal protein L31	rpmE	J	1		K02909	EF1171	0.115726	0.523462	0.146985	0.472144	-0.507574	0.00853162	0.300154	0.00434769	-0.714323	2.0954e-17
EF0917	conserved hypothetical protein		S	5			EF0917	0.320581	0.0784773	0.146411	0.519157	0.904055	1.47542e-09	-0.713755	0.000265574	0.524996	0.000243636
EF1004	glucose-6-phosphate 1-dehydrogenase	zwf	X	1	1.1.1.49	K00036	EF1004-EF1005	-0.0066057	0.966615	0.14546	0.219379	0.0439618	0.786928	-0.0344332	0.696034	0.054637	0.465749
EF0012	ribosomal protein L9	rplI	J	1		K02939	EF0011-EF0013	-0.0934826	0.337059	0.143079	0.109141	0.885385	7.30495e-28	0.216332	0.00337335	0.993419	1.71112e-37
EF1911	conserved hypothetical protein		S	5			EF1911	-0.538776	0.000179082	0.14254	0.28638	-0.166824	0.195776	0.408011	1.39633e-06	0.193876	0.0118939
EF3331	pheromone cCF10 percursor/lipoprotein, 60 kDa		U	4		K03217	EF3330-EF3333	0.0855449	0.611116	0.142217	0.384903	-0.522618	0.00064087	-0.279452	0.00229749	-0.467957	5.83711e-10
EF3044	N-acetylglucosamine-6-phosphate deacetylase	nagA-2	G	5	3.5.1.25	K01443	EF3042-EF3044	0.227481	0.27858	0.142175	0.479322	-0.363944	0.0528887	-0.425455	0.109202	-0.595634	0.00443278
EF1956	hypothetical protein		X	5			EF1956	-0.776331	4.14777e-08	0.141892	0.441371	-0.649997	6.64364e-08	0.501457	7.26368e-08	-0.0968445	0.336682
EF1723	signal peptidase II	lspA	MU	4	3.4.23.36	K03101	EF1723-EF1724	0.187511	0.0343047	0.141438	0.0757034	0.983825	1.31299e-24	0.212738	0.00571318	0.761471	2.7195e-26
EF1645	transcriptional regulator CodY	codY	X	4		K03706	EF1644-EF1648	0.0473776	0.628419	0.140711	0.114324	0.296603	0.000260644	-0.110239	0.141496	0.288204	0.000108143
EF1145	conserved hypothetical protein		S	5			EF1145	0.172311	0.0325586	0.139878	0.0891609	0.472292	8.1913e-08	-0.279514	0.00616407	0.229914	0.00261747
EF1580	conserved hypothetical protein		X	5			EF1580	-0.17575	0.0228293	0.138985	0.0369839	-0.87519	1.2762e-51	-0.380485	8.6479e-06	-0.602736	2.28695e-16
EF2767	transcriptional regulator		K	2		K03707	EF2767-EF2770	0.537169	6.25528e-05	0.138925	0.341029	0.932971	4.26866e-16	-0.102401	0.405893	0.67027	2.44398e-09
EF3013	conserved domain protein		X	5			EF3013	-0.0994348	0.280753	0.13775	0.0997663	0.578313	1.06324e-16	0.246079	0.0108151	0.665706	8.82998e-14
EF2571	conserved domain protein		O	3		K07402	EF2563-EF2572	0.00551459	0.978883	0.136936	0.24483	-0.331833	0.000581749	0.160814	0.187322	-0.125869	0.238981
EF2980	PTS system, IIA component		G	3		K17464	EF2975-EF2981	-0.0325043	0.934598	0.136764	0.864629	-0.22474	0.598634	0.693959	0.0731341	0.179211	0.653408
EF1003	isoleucyl-tRNA synthetase	ileS	J	1	6.1.1.5	K01870	EF1003	-0.0573418	0.766241	0.136643	0.472697	-0.463558	0.0135448	0.0417317	0.679706	-0.300332	9.03566e-05
EF1353	pyruvate dehydrogenase complex E1 component, alpha subunit	pdhA	C	3	1.2.4.1	K00161	EF1353-EF1356	0.119101	0.516318	0.136268	0.443922	-0.807101	2.17477e-06	-0.518332	4.53854e-07	-0.651136	2.71404e-14
EF0390	N-acyl-D-amino-acid deacylase family protein		FR	5		K01485	EF0389-EF0390	-0.196732	0.109436	0.135649	0.285115	0.522503	1.16976e-07	0.267737	0.0809924	0.608326	2.76848e-08
EF0375	hypothetical protein		X	5			EF0375	-0.175525	0.249802	0.13503	0.305215	-0.0527079	0.613579	0.216229	0.228554	0.37336	0.00950131
EF0822	hydrolase, haloacid dehalogenase-like family		R	5		K01560	EF0822-EF0823	0.150803	0.0417326	0.134601	0.0884938	0.356809	3.15944e-10	0.0642041	0.424362	0.22831	0.0042481
EF1296	acetyltransferase, GNAT family		R	4			EF1295-EF1296	0.0117258	0.874717	0.134363	0.0788892	-0.299539	1.79857e-05	0.232885	0.00351111	-0.252929	0.000578454
EF3108	peptide ABC transporter, permease protein		EP	3		K02033	EF3108	-0.452486	2.96443e-06	0.133994	0.197067	0.437756	0.00604855	-0.322494	3.22736e-06	0.963244	2.62568e-37
EF1559	conserved hypothetical protein		R	1			EF1556-EF1559	-0.10598	0.26664	0.133912	0.0731398	-0.248854	0.000130155	-0.10771	0.260315	-0.08373	0.365806
EF3260	heptaprenyl diphosphate synthase, component II, putative		H	5		K00805	EF3258-EF3260	0.197327	0.00972316	0.132761	0.0544113	-0.00653907	0.919577	0.520977	7.85601e-12	-0.40122	3.6829e-08
EF1756	phosphate ABC transporter, ATP-binding protein		P	2		K02036	EF1754-EF1759	0.159507	0.12088	0.132551	0.162736	-0.702929	4.71572e-17	0.110603	0.160876	-0.690572	4.93188e-17
EF1321	permease domain protein		V	4		K02004	EF1320-EF1321	-0.169022	0.0778169	0.132228	0.128929	0.812657	3.37841e-07	0.20621	0.00224903	0.917067	5.87479e-34
EF1783	phosphoribosylformylglycinamidine synthetase I	purQ	F	3	6.3.5.3	K01952	EF1777-EF1786	0.637629	4.00206e-07	0.129437	0.410652	0.885456	4.14242e-17	-0.374438	0.00253041	0.328359	0.000387153
EF1066	hexapeptide-repeat containing-acetyltransferase		R	5		K00661	EF1066	0.200719	0.106392	0.129349	0.351814	0.817576	1.76876e-11	0.021108	0.88704	0.468526	7.22514e-05
EF1550	DNA-binding protein HU	hup	X	5		K03530	EF1550	-0.472744	0.0187685	0.129011	0.518012	-0.57136	0.0036704	0.563877	7.75886e-07	0.0517541	0.577996
EF0785	drug resistance transporter, EmrB/QacA family protein		X	5			EF0785	-0.189432	0.053981	0.12852	0.148889	-0.401309	7.47466e-07	-0.23608	0.00341595	-0.252162	0.000265709
EF2667	copper homeostasis protein, putative		P	2		K06201	EF2667	-0.333255	0.000369362	0.127777	0.0901112	-0.81511	5.96258e-31	0.140679	0.161855	-0.618695	2.07377e-09
EF2465	hypothetical protein		X	5			EF2465-EF2467	0.013825	0.959476	0.127769	0.647342	0.0873203	0.74312	-0.173223	0.553337	-0.0866909	0.704085
EF0002	DNA polymerase III, beta subunit	dnaN	L	1	2.7.7.7	K02338	EF0001-EF0002	-0.0625556	0.541602	0.127283	0.187365	0.276181	0.00738543	0.275273	0.000751871	0.348727	1.63824e-06
EF0734	conserved hypothetical protein		E	3		K10536	EF0732-EF0734	0.294404	0.245124	0.12548	0.664314	0.907703	1.76252e-05	0.286856	0.229585	0.679732	0.000732661
EF3157	glycosyl hydrolase, family 65		G	3			EF3157-EF3158	0.342188	0.0421138	0.12509	0.304251	0.340116	0.0343277	-0.027667	0.770507	0.103003	0.183986
EF1937	conserved hypothetical protein		J	1			EF1937	0.541909	0.000200258	0.124159	0.407983	-0.551291	3.50814e-05	0.173895	0.227664	-0.899406	6.04487e-08
EF1620	hypothetical protein		X	5			EF1617-EF1622	0.352718	0.176846	0.123879	0.66734	-0.478674	0.0758885	-0.427613	0.148828	-0.66067	0.00250415
EF3152	large conductance mechanosensitive channel protein	mscL	X	5		K03282	EF3152	-0.352712	0.053195	0.123283	0.487109	0.177339	0.322686	0.550027	8.10933e-08	0.492461	5.18575e-06
EF2215	conserved hypothetical protein		S	3			EF2214-EF2215	-0.0263094	0.788043	0.1231	0.176822	-0.891982	2.50284e-27	-0.353722	0.0014387	-0.980074	5.44053e-23
EF0684	cmp-binding protein, putative		R	5		K03698	EF0681-EF0684	0.107121	0.284105	0.122957	0.207945	-0.256331	0.00305143	0.859791	1.3833e-23	-0.236875	0.000917958
EF0018	sigma-54 interaction domain protein		KT	1			EF0018	-0.0406539	0.689783	0.122734	0.178159	0.741574	2.42715e-19	0.091068	0.247227	0.650834	4.61471e-19
EF1381	conserved hypothetical protein TIGR00486		S	5			EF1380-EF1382	0.101229	0.370017	0.121995	0.159714	-0.181641	0.0217864	-0.2527	0.00355629	-0.213707	0.00579526
EF3066	peptide deformylase	def	X	5	3.5.1.88	K01462	EF3066	-0.164659	0.039239	0.121953	0.0834919	0.259831	3.71671e-05	0.0529117	0.492016	0.31511	3.16113e-05
EF3167	DNA mismatch repair protein HexA	hexA	L	1		K03555	EF3166-EF3172	-0.00965054	0.957123	0.121453	0.461149	0.0945827	0.562778	-0.144181	0.190528	0.221521	0.0254164
EF1578	iron-sulfur cluster-binding protein, putative		C	3		K18979	EF1578	-0.242684	0.0185196	0.121093	0.19925	-0.23131	0.00510289	0.239216	0.00280443	0.0829051	0.297945
EF0265	cell division protein FtsH	ftsH	O	1	3.4.24.-	K03798	EF0261-EF0268	0.0207122	0.91186	0.120875	0.510651	-0.283116	0.118926	0.012323	0.908971	-0.240735	0.0038163
EF0797	conserved domain protein		X	5			EF0797-EF0798	0.042392	0.561874	0.120378	0.0904616	-0.231586	5.40014e-05	-0.228514	0.00531545	-0.129217	0.095321
EF0846	ATP-dependent RNA helicase, DEAD/DEAH box family		LKJ	1		K05592	EF0846	0.0836994	0.640189	0.120067	0.500362	0.625924	0.000540108	0.29376	0.00302187	0.440792	2.68409e-08
EF1817	serine proteinase, V8 family		X	3			EF1817-EF1818	-0.257806	0.197283	0.120053	0.543716	-0.369393	0.0580588	0.0584964	0.613017	-0.0388935	0.64471
EF2694	MTA/SAH nucleosidase	pfs	F	5	3.2.2.16	K01243	EF2694-EF2696	-0.496412	1.88262e-05	0.11983	0.477633	-0.472309	0.0003216	0.483618	1.07778e-06	-0.0549873	0.501691
EF1274	translation initiation factor IF-2	infB	J	1		K02519	EF1270-EF1275	0.242699	0.22164	0.118446	0.522278	-0.511382	0.00507469	-0.209529	0.102462	-0.586327	7.47695e-08
EF2552	Sua5/YciO/YrdC/YwlC family protein		J	1		K07566	EF2552-EF2555	0.0411012	0.679107	0.117509	0.210379	-0.153577	0.0636953	-0.0695787	0.381757	-0.211975	0.0039548
EF2227	ABC transporter, ATP-binding/permease protein		V	4		K06147	EF2226-EF2227	0.0557959	0.791134	0.116138	0.598196	-0.122142	0.561269	-0.220067	0.347639	-0.498826	0.0111592
EF0935	primase-related protein		L	1		K05985	EF0934-EF0936	0.0589519	0.487002	0.11575	0.0893934	-0.157167	0.0126148	-0.260587	0.0034125	-0.185495	0.0290118
EF1166	YitT family protein		S	5			EF1166	0.210774	0.0421516	0.115216	0.308528	-0.723028	8.8944e-10	0.419568	0.000115997	-0.982171	3.56791e-20
EF3132	conserved hypothetical protein		S	5			EF3131-EF3132	-0.125307	0.203404	0.115189	0.197994	-0.0890457	0.243686	-0.348829	0.000701039	0.0524435	0.579945
EF1972	hypothetical protein		X	1			EF1970-EF1972	0.149668	0.0681318	0.11304	0.143307	-0.0374756	0.61379	0.41263	8.26e-08	-0.179571	0.0161656
EF1933	hypothetical protein		X	5			EF1933-EF1935	0.700572	1.10165e-10	0.112775	0.559404	0.252418	0.0141165	-0.319029	0.00321617	-0.443679	4.53639e-05
								-0.0624771	0.888498	0.112674	0.715749	0.418875	0.10812	0.0839547	0.828324	0.404951	0.103673
EF3317	carboxylase, putative		C	3		K01571	EF3317-EF3326	-0.163265	0.0433205	0.111741	0.18156	-0.141454	0.0415664	0.291139	0.000894866	-0.0397699	0.637091
EF0948	uracil-DNA glycosylase	ung	L	1	3.2.2.-	K03648	EF0948	-0.0960725	0.273623	0.111713	0.1761	-0.544743	7.9322e-13	-0.0682033	0.472849	-0.570618	1.32873e-11
EF2747	D-alanyl carrier protein	dltC	IQ	4		K14188	EF2746-EF2750	-0.0759821	0.397778	0.111652	0.206475	-0.389474	5.5561e-07	-0.0673816	0.445413	-0.180418	0.0300937
EF2625	NH(3)-dependent NAD+ synthetase	nadE	H	4	6.3.5.1	K01916	EF2625-EF2626	-0.12407	0.206824	0.111465	0.214825	-0.224795	0.00677835	0.0617553	0.36251	0.141663	0.0536394
EF2642	glycine betaine/L-proline ABC transporter, glycine betaine/L-proline-binding/permease protein		E	3		K02001	EF2641-EF2642	0.931343	2.64378e-21	0.111105	0.308377	0.638566	2.72296e-12	-0.0636641	0.488904	-0.0793973	0.330416
EF1153	thermostable carboxypeptidase 1		E	3	3.4.17.19	K01299	EF1152-EF1153	-0.0703288	0.685325	0.110343	0.516596	-0.348151	0.0322226	-0.16337	0.0929879	-0.135909	0.10081
EF1949	conserved hypothetical protein		S	5			EF1949	-0.550847	1.45754e-06	0.110118	0.259825	-0.478969	7.92058e-08	-0.4763	9.64898e-05	0.257036	0.0136624
EF3172	competence/damage-inducible protein CinA	cinA	R	1		K03742	EF3166-EF3172	0.0247022	0.800296	0.109962	0.235372	-0.674159	4.19866e-15	-0.50146	3.46512e-12	-0.62378	1.22931e-19
EF2668	magnesium transporter	mgtE	P	2		K06213	EF2668	-0.194331	0.0452756	0.109739	0.235017	-0.0197297	0.809893	0.383509	1.99866e-07	-0.0356151	0.60132
EF0790	ABC transporter, ATP-binding/permease protein		V	4		K18892	EF0789-EF0790	0.0793559	0.425993	0.109486	0.244371	-0.548933	1.17163e-10	0.217811	0.00520459	-0.539836	5.50546e-14
EF1624	aldehyde dehydrogenase, putative		C	3			EF1623-EF1627	0.442744	0.0177432	0.109027	0.587217	0.0715623	0.697635	-0.52979	0.0105558	-0.212148	0.243207
EF1690	oxidoreductase, short-chain dehydrogenase/reductase family		R	5		K07124	EF1689-EF1691	-0.170572	0.0777393	0.108775	0.220199	0.352829	1.4319e-05	0.19343	0.0096064	0.517563	1.19237e-13
EF0447	menaquinone-specific isochorismate synthase, putative		HQ	4		K02552	EF0447	-0.00589897	0.972048	0.108562	0.484297	-0.527203	3.02176e-11	0.0681596	0.464951	-0.440011	2.01797e-09
EF2561	dihydroorotate dehydrogenase electron transfer subunit, putative		H	3		K00528	EF2559-EF2562	0.122986	0.617108	0.108384	0.698774	-0.303668	0.205988	0.417859	0.0555188	-0.203756	0.38145
EF0760	amino acid ABC transporter, ATP-binding protein		E	3		K02028	EF0760-EF0761	-0.229999	0.198061	0.10754	0.547673	-0.0178771	0.918968	0.425968	2.79677e-05	0.271747	0.000624953
EF1375	hypothetical protein		X	5			EF1375	-0.0568614	0.490762	0.107	0.142026	0.37444	2.74023e-05	-0.282815	0.000560013	0.30762	1.93906e-05
EF1273	ribosomal protein L7A family		J	1			EF1270-EF1275	0.361604	0.00748944	0.106378	0.254554	-0.544342	1.10108e-10	-0.447685	0.000197901	-0.820332	6.08883e-12
EF0763	excinuclease ABC, subunit A	uvrA	L	1		K03701	EF0762-EF0763	0.860027	5.15461e-14	0.105692	0.252594	-0.0694569	0.414966	0.910619	6.16313e-21	-0.904357	2.34232e-37
EF0999	conserved hypothetical protein		S	4		K09772	EF0988-EF1002	0.178096	0.296244	0.105527	0.493271	-0.0782856	0.619041	-0.180518	0.0723387	-0.243936	0.00501812
EF2917	UDP-N-acetylglucosamine 2-epimerase		M	4	5.1.3.14	K01791	EF2917-EF2918	-0.0756322	0.347049	0.10552	0.131472	0.312482	0.000151446	0.125223	0.109911	0.459161	5.67686e-10
EF2867	conserved hypothetical protein		R	5			EF2866-EF2868	0.140319	0.0977463	0.104601	0.128677	-0.0615334	0.30745	0.0807702	0.340657	-0.325011	6.78807e-05
EF3332	ribonuclease P protein component	rnpA	J	4	3.1.26.5	K03536	EF3330-EF3333	-0.0855197	0.286455	0.104498	0.143131	-0.687927	2.11989e-27	-0.471594	1.42413e-07	-0.459308	5.38646e-08
EF1341	ABC transporter, ATP-binding/permease protein		V	4		K02003	EF1341	0.325501	0.00221301	0.104413	0.185126	0.876513	2.27381e-22	-0.122733	0.126305	0.610111	2.04156e-15
EF1113	exonuclease RexA	rexA	L	1		K16898	EF1112-EF1113	0.280726	0.116072	0.104395	0.53418	-0.000172459	0.999439	0.572662	4.50696e-08	-0.140857	0.0967993
EF2957	hexapeptide-repeat containing-acetyltransferase		R	5			EF2956-EF2957	-0.0049777	0.963183	0.104307	0.748922	0.580029	0.0126589	0.256319	0.306575	0.501385	0.0123
EF0380	conserved hypothetical protein		X	5			EF0379-EF0380	0.0342673	0.790506	0.104053	0.396295	0.30882	0.0014127	0.00887864	0.963292	0.43654	0.0001354
EF3018	conserved domain protein		X	5			EF3018	0.0665206	0.397526	0.103996	0.159554	-0.705614	1.94983e-33	0.186506	0.0194785	-0.559295	5.27423e-13
EF3095	hydrolase, haloacid dehalogenase-like family		R	4			EF3094-EF3097	-0.124572	0.272602	0.10305	0.264162	-0.818704	1.30797e-21	0.162188	0.092162	-0.625368	8.54533e-12
EF2415	GatB/Yqey family protein		S	1		K09117	EF2415-EF2416	-0.164077	0.394129	0.102438	0.582584	-0.0570681	0.759734	0.336951	0.00397133	0.0966558	0.365534
EF2051	transcriptional regulator, GntR family		K	1			EF2051	-0.214603	0.0477136	0.102348	0.335151	-0.612311	5.86438e-12	0.208939	0.0514584	-0.275428	0.00103509
EF0449	hydrolase, alpha/beta hydrolase fold family		R	5		K08680	EF0449	-0.00694943	0.942878	0.102153	0.268418	-0.45234	4.97027e-08	0.145741	0.0496383	-0.305975	2.8875e-05
EF2071	conserved hypothetical protein		X	3			EF2071-EF2073	-0.0427712	0.583504	0.100875	0.164169	-0.492527	1.01013e-16	-0.477787	1.2973e-08	-0.514224	3.1625e-11
EF0286	fibronectin-binding protein, putative		X	5			EF0286	0.361873	0.00548679	0.100271	0.503747	0.481508	6.31691e-05	0.019387	0.864478	-0.0510485	0.643563
EF2438	PTS system, IIA component		X	5		K02777	EF2438	0.259125	0.0125178	0.0991207	0.317097	0.400494	1.51671e-07	0.214987	0.0647107	0.0365671	0.686048
EF0863	glycine betaine/carnitine/choline ABC transporter, glycine betaine/carnitine/choline-binding protein		M	3		K05845	EF0862-EF0865	-0.00432148	0.980093	0.0986932	0.544761	0.297717	0.0675993	0.0560795	0.564018	0.348822	1.75631e-05
EF0956	beta-phosphoglucomutase	pgmB	R	3	5.4.2.6	K01838	EF0955-EF0957	0.103969	0.69999	0.0976358	0.714336	0.618207	0.00278658	0.551845	0.0284536	0.237394	0.211565
EF0279	HD domain protein		R	5		K06950	EF0277-EF0279	0.0797171	0.502501	0.0975339	0.43835	-0.599937	1.11892e-08	-0.420298	0.000518362	-0.534624	4.90333e-06
EF2478	conserved hypothetical protein		X	5			EF2477-EF2479	0.0181658	0.865212	0.0971483	0.316594	-0.127416	0.159765	0.0305101	0.729542	0.0145976	0.856422
EF3258	conserved hypothetical protein		S	5			EF3258-EF3260	-0.182083	0.138896	0.095201	0.415919	-0.986568	1.20678e-18	-0.359209	0.00849381	-0.809182	5.31822e-09
EF2677	negative regulator of genetic competence MecA, putative		X	5		K16511	EF2677	-0.144932	0.388071	0.0949782	0.563194	0.194927	0.233445	-0.45168	1.59631e-07	0.356514	3.79524e-06
EF0466	glucosamine-6-phosphate isomerase	nagB	G	3	5.3.1.10	K02564	EF0466	0.375	7.90698e-06	0.0939736	0.371962	-0.0895207	0.206669	-0.0886297	0.296917	-0.306648	0.000359439
EF0451	glucosamine-6-phosphate isomerase, putative		G	3			EF0451	-0.226773	0.0257593	0.0933149	0.316495	-0.665886	8.66066e-15	0.234427	0.0294294	-0.32433	0.00534069
EF1835	galactose-6-phosphate isomerase, LacA subunit	lacA	G	3	5.3.1.26	K01819	EF1834-EF1835	-0.229112	0.376932	0.0909333	0.773196	-0.582605	0.0235425	-0.188222	0.528573	-0.532353	0.0756462
EF2550	serine hydroxymethyltransferase	glyA	E	3	2.1.2.1	K00600	EF2549-EF2550	-0.210401	0.231338	0.0909262	0.599023	-0.181018	0.287042	0.251607	0.00984917	-0.0131961	0.86034
EF1906	conserved hypothetical protein		R	3		K06890	EF1906-EF1907	0.0198233	0.859585	0.0907347	0.377002	0.267066	0.00593319	0.495998	1.37973e-08	0.12923	0.177549
EF1142	hydrolase, haloacid dehalogenase-like family		R	5			EF1142-EF1144	0.0357759	0.721137	0.0904348	0.340831	0.523262	2.15104e-09	0.252594	0.00054988	0.446661	5.9375e-11
EF2650	spermidine/putrescine ABC transporter, permease protein		ER	3		K11070	EF2649-EF2653	0.255302	0.0504465	0.0903381	0.439555	-0.678249	2.82061e-10	-0.229011	0.0944254	-0.844807	1.91031e-11
EF2688	Snf2 family protein		KL	1			EF2688-EF2690	-0.25867	0.161927	0.0894466	0.619011	0.0242214	0.891961	0.308461	0.00549345	0.375148	5.47804e-05
EF0267	zinc-binding TIM-barrel protein, nifR3 family, putative		J	1			EF0261-EF0268	0.0576532	0.551669	0.0893833	0.348431	-0.221609	0.00741762	0.00867163	0.905454	-0.269777	6.67386e-05
EF0424	2-dehydro-3-deoxygluconokinase, putative		G	3		K00874	EF0423-EF0426	0.148302	0.650028	0.0884643	0.780035	-0.0785723	0.742623	0.0642488	0.877446	-0.0868395	0.799697
EF1748	prolipoprotein diacylglyceryl transferase	lgt	X	2	2.4.99.-	K13292	EF1748-EF1749	-0.00734885	0.942702	0.0880237	0.364819	-0.285336	0.000715965	-0.113247	0.171764	-0.29116	7.37069e-05
EF0657	transcriptional regulator, DeoR family		KG	3			EF0657-EF0658	0.213042	0.0392014	0.0874139	0.365307	-0.808524	1.04501e-19	-0.459325	2.63376e-05	-0.952363	4.67171e-17
EF0901	isopentenyl diphosphate delta isomerase, putative		C	3		K01823	EF0901-EF0904	-0.0974941	0.287336	0.0867058	0.215008	-0.122072	0.0548019	0.411117	3.78968e-06	-0.221574	0.00891859
EF1030	endonuclease/exonuclease/phosphatase family protein		X	5			EF1029-EF1031	0.385755	0.0137617	0.0853048	0.6153	-0.411032	0.00361031	-0.128443	0.387413	-0.698695	5.76804e-07
EF1755	phosphate ABC transporter, ATP-binding protein		P	2		K02036	EF1754-EF1759	0.151771	0.127256	0.0847293	0.367422	-0.557776	5.40067e-12	-0.0265581	0.768695	-0.611997	2.59828e-14
EF2378	DNA polymerase III, alpha subunit, Gram-positive type		L	1	2.7.7.7	K03763	EF2378	-0.0619189	0.727624	0.0842876	0.632876	-0.373359	0.0301429	0.186707	0.0540476	-0.290819	0.000113792
EF0747	conserved hypothetical protein		S	5			EF0747	0.0106348	0.914547	0.0838567	0.30638	0.156734	0.0152481	-0.463925	1.44276e-06	0.180225	0.037493
EF1034	conserved domain protein		R	5			EF1034	-0.28018	0.0273319	0.0832565	0.560677	-0.821485	3.02551e-09	-0.390679	0.0302338	-0.456102	0.000489275
EF2239	hypothetical protein		X	5			EF2239	-0.0993184	0.641999	0.0829879	0.697872	-0.0282947	0.940623	0.227671	0.345044	0.463979	0.00402606
EF0683	conserved hypothetical protein		S	5			EF0681-EF0684	0.387532	0.0259945	0.0827271	0.368117	-0.328468	9.22193e-05	0.425594	9.0197e-05	-0.688358	1.20521e-13
EF1754	PhoU family protein		P	2		K02039	EF1754-EF1759	0.0200598	0.840063	0.0820802	0.384475	-0.471696	1.64249e-08	0.26256	0.0027198	-0.417645	2.74225e-08
EF2659	conserved hypothetical protein		S	5			EF2659	0.198635	0.058341	0.0816925	0.366419	-0.1363	0.105554	-0.0216402	0.789258	-0.306456	0.000159423
EF1037	L-aspartate beta-decarboxylase, putative		E	3		K09758	EF1037	0.0867096	0.397733	0.0808326	0.399071	0.861439	2.64137e-24	0.0649615	0.411198	0.645681	1.24866e-19
EF1374	phnA protein	phnA	P	2		K06193	EF1374	-0.00873531	0.917694	0.0806434	0.29243	0.00366375	0.943068	0.280027	0.000361744	0.048937	0.512804
EF1625	microcompartment protein family		QC	3			EF1623-EF1627	0.330734	0.126828	0.0806322	0.799499	-0.189589	0.436477	-0.718355	0.0039355	-0.442623	0.0385552
EF0672	hypothetical protein		X	5			EF0672	-0.120356	0.436669	0.0802021	0.5986	-0.379272	0.00653073	0.150584	0.345068	-0.301986	0.0297105
EF0450	mandelate racemase/muconate lactonizing enzyme family protein		MR	4		K02549	EF0450	-0.117994	0.228043	0.0800986	0.364116	-0.393233	1.31718e-06	0.244701	0.00298977	-0.250482	0.000706683
EF2771	conserved hypothetical protein		X	5			EF2771	0.527863	0.00174942	0.0796715	0.648361	0.865873	7.85213e-14	-0.454805	0.0067319	0.329418	0.0204338
EF2893	hypothetical protein		X	5			EF2892-EF2893	0.370675	9.34807e-06	0.0796635	0.33015	-0.124544	0.0417549	0.0349058	0.686859	-0.798415	2.63853e-21
EF3200	ABC transporter, ATP-binding protein		P	2		K02071	EF3198-EF3200	0.201357	0.102207	0.0795072	0.58012	0.777112	7.75152e-16	0.674333	8.77125e-09	0.448364	2.54091e-05
EF2744	peptidase, M42 family		G	3			EF2743-EF2744	-0.347137	0.00122081	0.0790045	0.426278	-0.585367	2.33044e-12	0.34485	1.61434e-05	0.0730679	0.370335
EF1312	S1 RNA binding domain protein		K	1		K06959	EF1312-EF1313	0.211025	0.23849	0.0787008	0.643023	-0.345209	0.0361384	-0.115767	0.255793	-0.474162	2.33474e-08
EF1504	diaminopimelate decarboxylase	lysA	E	3	4.1.1.20	K01586	EF1504	-0.401723	1.84303e-06	0.0787002	0.3056	0.272789	9.30959e-06	0.252364	0.00287326	0.802279	1.93344e-24
EF2984	transcriptional regulator, putative		TK	1			EF2984	0.13818	0.798257	0.0784949	0.926162	0.881669	0.00588741	-0.752909	0.0732127	0.56056	0.0626116
EF0842	YaiI/YqxD family protein		S	1		K09768	EF0841-EF0842	0.000917412	0.986817	0.077231	0.438117	0.80402	8.33561e-41	-0.139387	0.0847671	0.619318	6.4309e-18
EF1491	nrdI family protein		F	3		K03647	EF1490-EF1491	-0.102073	0.342765	0.0768359	0.480719	0.290149	0.000928936	0.256407	0.0144383	0.4776	9.99287e-07
EF2859	4-oxalocrotonate tautomerase, putative		R	5		K01821	EF2859	-0.171385	0.0956479	0.0765547	0.477228	-0.443301	1.10417e-06	-0.137913	0.244316	-0.340234	0.00147661
EF0690	conserved hypothetical protein		M	4			EF0690-EF0691	0.330347	2.68012e-05	0.0746887	0.345871	0.652516	6.57091e-27	0.261203	0.00154758	-0.0699504	0.372499
EF2406	glycyl-tRNA synthetase, beta subunit	glyS	J	5	6.1.1.14	K01879	EF2405-EF2407	-0.103358	0.561796	0.0745019	0.671219	-0.493056	0.00404398	0.0556907	0.571699	-0.371907	1.13804e-06
EF2884	acyl carrier protein, putative		IQ	3		K02078	EF2875-EF2886	0.304036	0.00322518	0.0732714	0.446966	-0.419001	7.45054e-13	-0.102283	0.209411	-0.714716	1.93761e-20
EF3123	methionyl-tRNA formyltransferase	fmt	J	4	2.1.2.9	K00604	EF3117-EF3123	-0.00211224	0.984153	0.0727812	0.425002	-0.552128	2.29503e-10	0.024125	0.752266	-0.371916	1.07025e-06
EF0201	translation elongation factor Tu	tuf	J	1		K02358	EF0198-EF0201	0.00220765	0.991212	0.0722743	0.725835	-0.696327	0.000421785	-0.0433315	0.711882	-0.60163	4.50796e-12
EF0925	hypothetical protein		X	5			EF0925	-0.509213	0.0179327	0.0706936	0.809943	0.0323169	0.793801	0.0728546	0.838167	-0.116743	0.609975
EF0957	glycosyl hydrolase, family 65		G	3		K00691	EF0955-EF0957	0.255183	0.0693654	0.0697154	0.684252	0.479074	0.000248302	0.550112	6.88602e-05	0.398682	0.000724056
EF2497	ABC transporter, permease protein		P	2		K02072	EF2496-EF2498	0.0388927	0.620526	0.0681828	0.348835	-0.293956	5.58208e-07	-0.0090357	0.913388	-0.217407	0.00725751
EF2456	pyruvate carboxylase	pycA	C	5	6.4.1.1	K01958	EF2453-EF2458	-0.156727	0.381603	0.0673797	0.727595	0.109212	0.542438	0.264178	0.0107407	0.333547	3.03609e-05
EF0117	transcriptional regulator, GntR family		KE	1			EF0116-EF0117	0.256628	0.0143678	0.0671608	0.531892	0.303308	0.000317269	-0.0773498	0.423271	0.150168	0.0932265
EF3285	PTS system, IIC component		G	3		K02761	EF3284-EF3285	0.334586	0.427348	0.0665936	0.902958	0.156453	0.715498	0.653172	0.0191024	-0.484369	0.0758292
EF3061	rod shape-determining protein MreD	mreD	M	4		K03571	EF3061-EF3062	-0.0384347	0.716721	0.066214	0.480564	-0.0251574	0.774181	0.879602	3.91098e-19	-0.244741	0.0123357
EF1617	conserved hypothetical protein		E	5		K04030	EF1617-EF1622	-0.302918	0.277592	0.0657142	0.852549	0.0331519	0.922234	0.350554	0.166392	0.328504	0.154069
EF1577	dihydrofolate reductase	folA	H	5	1.5.1.3	K00287	EF1575-EF1577	-0.232335	0.00297604	0.0654192	0.323383	-0.368055	9.76594e-10	0.132007	0.145403	-0.110283	0.15146
EF1815	transcriptional regulator, LysR family, putative		K	1			EF1815	-0.451353	2.76078e-05	0.0650515	0.652961	0.751786	2.1888e-21	-0.035124	0.78995	0.610903	2.93739e-07
EF1199	conserved hypothetical protein		S	5		K08986	EF1198-EF1199	-0.0772075	0.417226	0.0650355	0.504126	0.416412	9.41584e-08	0.251769	0.00620106	0.442967	1.87405e-07
EF0668	UDP-N-acetylmuramoylalanyl-D-glutamate-2,6-diaminopimelate ligase, putative		M	4		K05362	EF0668	0.04977	0.639138	0.0643383	0.521663	-0.128117	0.171284	0.116371	0.165379	-0.367165	2.88185e-07
EF0895	glycerol dehydrogenase, putative		C	3		K08317	EF0895	0.0380482	0.721544	0.0636114	0.558217	-0.234418	0.00865067	-0.246422	0.0316826	-0.162725	0.1813
EF1185	metallo-beta-lactamase superfamily protein		R	3		K12574	EF1183-EF1185	-0.210658	0.255787	0.0621594	0.737265	0.0190905	0.917495	0.357692	0.000315043	0.276201	0.000261137
EF1785	phosphoribosylaminoimidazole-succinocarboxamide synthase	purC	X	3	6.3.2.6	K01923	EF1777-EF1786	0.687966	1.36394e-08	0.0615173	0.686792	0.897306	6.29216e-18	-0.609935	0.000181985	0.223893	0.030017
EF2780	conserved hypothetical protein TIGR00103		S	1		K09747	EF2780-EF2781	-0.17842	0.0816922	0.0613933	0.495008	-0.337023	5.96924e-05	0.209561	0.00803253	-0.0137563	0.86098
EF1787	phosphoribosylaminoimidazole carboxylase, catalytic subunit	purE	F	3	4.1.1.21	K01588	EF1786-EF1787	-0.0411223	0.768119	0.0593883	0.66852	0.400606	0.000359952	-0.658289	7.87519e-06	0.473373	0.000127864
EF0727	diacylglycerol kinase catalytic domain protein		IR	1		K07029	EF0724-EF0727	-0.0652559	0.733123	0.0592093	0.753458	0.0604055	0.750999	0.138186	0.171954	0.204382	0.00821675
EF1496	V-type ATPase, subunit C		C	3	3.6.3.14	K02119	EF1492-EF1500	-0.0137289	0.905462	0.0589347	0.532613	-0.0503353	0.616034	-0.157449	0.0733667	0.18951	0.0180978
EF1373	DHH family protein		R	5		K06881	EF1371-EF1373	-0.102593	0.297656	0.0586374	0.526051	0.160521	0.0558205	0.238357	0.0009541	0.342025	7.57583e-07
EF3275	hydantoinase/oxoprolinase		EQ	5			EF3275-EF3277	-0.595109	2.40274e-15	0.0585038	0.44095	-0.344633	1.14316e-08	0.185437	0.0316019	0.161781	0.0354442
EF2578	peptidase, M20/M25/M40 family		E	3			EF2577-EF2579	-0.122649	0.666777	0.058474	0.894576	-0.383545	0.0931298	0.341151	0.245357	0.147535	0.586097
EF1970	aspartyl-tRNA synthetase	aspS	J	1	6.1.1.12	K01876	EF1970-EF1972	0.0217922	0.907323	0.0580744	0.753874	-0.383374	0.0333518	0.0253377	0.801835	-0.249185	0.00122895
EF2450	PDZ domain protein		T	4		K07177	EF2450-EF2452	-0.146467	0.141628	0.0580013	0.563307	-0.777524	4.64512e-40	-0.00644626	0.932412	-0.562854	1.92116e-14
EF1314	aspartate aminotransferase, putative		E	3		K14260	EF1314	-0.228418	0.0209561	0.0561635	0.553626	-0.171294	0.0400982	0.212462	0.00459746	0.151092	0.0370013
EF1207	citrate carrier protein, CCS family		X	3			EF1206-EF1207	0.610514	0.0554912	0.0555102	0.890688	0.124027	0.701506	-0.175348	0.592004	-0.0249383	0.957764
EF2652	spermidine/putrescine ABC transporter, ATP-binding subunit		E	3		K11072	EF2649-EF2653	-0.0832611	0.482256	0.0535749	0.639558	-0.503437	7.55838e-08	-0.511433	8.72825e-05	-0.40395	0.00044659
EF1031	phosphorylase family protein		F	5		K01243	EF1029-EF1031	0.0723883	0.753449	0.052455	0.841056	0.241391	0.198736	0.630836	0.000586104	-0.0778024	0.679709
EF2732	CBS domain protein		R	5			EF2732	-0.175107	0.0663783	0.0523737	0.553161	0.365453	2.58263e-06	-0.10654	0.118246	0.714428	4.625e-23
EF1176	conserved hypothetical protein		X	5			EF1176-EF1177	0.401009	0.147363	0.0513918	0.895098	0.717784	0.00537829	-0.394525	0.172154	0.126879	0.597482
EF0111	oxidoreductase, zinc-binding		CR	3		K00001	EF0111	0.15537	0.191073	0.0512465	0.676922	0.163519	0.108133	0.114756	0.329982	0.145111	0.143554
EF1043	conserved hypothetical protein		X	5			EF1043	-0.189549	0.08329	0.051231	0.620396	-0.584647	2.92581e-09	0.0951397	0.197033	-0.328541	8.33718e-07
EF0998	conserved hypothetical protein TIGR00044		R	4		K06997	EF0988-EF1002	0.0588878	0.745868	0.051211	0.778827	-0.358921	0.0373822	-0.303481	0.00303679	-0.439947	6.62184e-07
EF1320	ABC transporter, ATP-binding protein		V	4		K02003	EF1320-EF1321	-0.245542	0.0436345	0.0505959	0.648657	-0.341986	0.000393811	-0.306166	0.00964226	0.108378	0.27447
EF1501	hypothetical protein		X	5			EF1501	-0.0711051	0.36175	0.0504853	0.468775	0.0702606	0.193792	0.183662	0.0461614	0.330124	1.50433e-05
EF3112	fatty acid/phospholipid synthesis protein PlsX	plsX	I	1		K03621	EF3111-EF3115	-0.0825213	0.396246	0.0504312	0.571996	-0.729137	1.6638e-18	0.281779	4.34779e-05	-0.741603	3.02879e-27
EF0448	2-succinyl-6-hydroxy-2,4-cyclohexadiene-1-carboxylic acid synthase/2-oxoglutarate decarboxylase	menD	H	4	4.1.1.71	K02551	EF0448	-0.0682661	0.689821	0.0500158	0.763467	-0.513435	0.00127982	0.106655	0.263919	-0.329213	4.16908e-05
EF0981	geranyltranstransferase	ispA	H	1	2.5.1.10	K13789	EF0976-EF0984	0.0420681	0.691896	0.0489419	0.616839	-0.275745	1.33457e-05	-0.312153	3.92754e-05	-0.179538	0.0135323
EF1184	dihydrodipicolinate synthase	dapA	EM	3	4.2.1.52	K01714	EF1183-EF1185	-0.217338	0.0254068	0.0485319	0.585028	-0.182178	0.0241183	0.0644328	0.363993	0.219278	0.00242
EF1251	hypothetical protein		X	5			EF1251	-0.272049	0.00159421	0.0479168	0.64882	-0.257491	0.000110191	-0.0731052	0.469164	-0.0127177	0.896746
EF1265	conserved hypothetical protein		R	5		K06969	EF1265-EF1266	0.0365554	0.611777	0.0478893	0.497142	-0.407205	3.48808e-11	0.13939	0.0808448	-0.486334	7.68096e-10
EF2901	D-isomer specific 2-hydroxyacid dehydrogenase family protein		H	4			EF2901	-0.0311743	0.74818	0.0476985	0.604839	-0.0435867	0.585509	-0.225974	0.00178751	0.0673395	0.348641
EF0837	conserved hypothetical protein		R	5		K01465	EF0835-EF0840	0.0534264	0.713089	0.0469436	0.751715	-0.185739	0.178075	0.0063503	0.973774	-0.276474	0.0282918
EF0887	glycosyl transferase, group 2 family protein		M	5			EF0884-EF0890	-0.037827	0.753272	0.0458626	0.737947	-0.349371	0.00309019	0.497486	8.43017e-06	-0.359313	0.000424172
EF3253	cell wall surface anchor family protein		X	5			EF3252-EF3253	-0.0176165	0.94778	0.0452618	0.836611	-0.124746	0.444446	0.708916	0.000424085	-0.12827	0.501405
EF2674	oligoendopeptidase F,plasmid	pepF	E	3	3.4.24.-	K08602	EF2674-EF2675	-0.379247	0.0301247	0.0448864	0.793768	0.140066	0.416765	0.0981412	0.303917	0.558587	1.4114e-12
EF3207	dihydrouridine synthase family protein		J	1			EF3207	0.227665	0.0220557	0.0441492	0.592612	0.556085	1.18661e-14	0.0393665	0.682798	0.247304	0.00598237
EF3265	dihydropteroate synthase	folP	H	4	2.5.1.15	K00796	EF3264-EF3269	-0.132257	0.105869	0.0432447	0.615729	0.295958	1.86511e-06	0.302738	0.0004619	0.544111	4.07415e-11
EF3043	PTS system, IIC component		X	5	2.7.1.69	K02746	EF3042-EF3044	-0.1633	0.534361	0.042945	0.913822	-0.354571	0.125832	0.0727674	0.806471	-0.703038	0.00517282
EF0900	aldehyde-alcohol dehydrogenase	adhE	C	3		K04072	EF0900	0.255933	0.190655	0.042893	0.825009	-0.485147	0.0108801	-0.288661	0.00900744	-0.260248	0.00160664
EF1046	pyruvate kinase	pyk	X	3	2.7.1.40	K00873	EF1044-EF1046	-0.133631	0.496007	0.042401	0.826861	-0.7161	0.000179291	0.202419	0.0661339	-0.432671	2.85836e-07
EF0119	phenazine biosynthesis protein PhzF family		R	3			EF0118-EF0119	-0.558601	0.00359693	0.0423706	0.828766	-0.588763	0.000369897	0.288137	0.301117	-0.0944357	0.617
EF3058	phosphotyrosine protein phosphatase		T	2	3.1.3.48	K01104	EF3057-EF3058	0.0342582	0.76454	0.0418605	0.782048	-0.0740763	0.464243	0.104359	0.391621	-0.205222	0.0719534
EF0886	hypothetical protein		X	5			EF0884-EF0890	-0.0829931	0.493612	0.041427	0.642054	-0.358097	1.14499e-05	0.644005	3.67006e-08	-0.297693	0.00837206
EF1727	ebsA protein	ebsa	X	5			EF1727	0.311663	0.125419	0.0409229	0.892344	0.990595	1.51126e-09	0.223993	0.34372	0.431115	0.00217186
EF0881	transcriptional regulator, NrdR family	nrdR	X	1		K07738	EF0881-EF0883	-0.040073	0.700626	0.0406213	0.676575	0.0116959	0.892474	-0.266995	0.00247562	0.183402	0.00988546
EF0911	peptide ABC transporter, ATP-binding protein		EP	3		K15583	EF0909-EF0912	-0.0318192	0.858593	0.040607	0.831453	0.0893061	0.61497	-0.0495347	0.626943	0.255492	0.00107499
EF2735	exodeoxyribonuclease	exoA	L	1	3.1.11.2	K01142	EF2735-EF2736	-0.0088603	0.930753	0.0383483	0.642628	0.538009	3.60278e-16	0.243585	0.00658395	0.467134	1.01539e-08
EF0118	ornithine cyclodeaminase, putative		E	3		K01750	EF0118-EF0119	-0.562009	0.00200159	0.0373201	0.836652	-0.695017	1.98338e-05	0.687343	0.00240261	0.0465162	0.837866
EF2990	rhodanese family protein		P	2			EF2988-EF2990	0.313431	0.401849	0.0368875	0.964705	-0.0462016	0.870471	-0.953327	0.00443869	-0.251218	0.354125
EF1497	V-type ATPase, subunit G		C	3	3.6.3.14	K02122	EF1492-EF1500	-0.0225976	0.839026	0.0368079	0.701149	-0.116311	0.170111	-0.2145	0.0284166	0.21102	0.0194341
EF2895	aminotransferase, class II		E	3		K14155	EF2895	-0.108263	0.257785	0.0366128	0.68216	0.0490411	0.544014	-0.173833	0.0148756	0.198613	0.00343349
EF1597	catalase/peroxidase	katA	P	2	1.11.1.6	K03781	EF1597	0.498	5.14459e-09	0.036285	0.640945	-0.451774	4.41696e-11	0.0614362	0.499306	-0.739755	3.50542e-17
EF0239	cobalt transport family protein		P	2		K16785	EF0237-EF0239	-0.246353	0.0135688	0.0358992	0.706038	-0.103444	0.215509	0.229917	0.00195689	0.101009	0.157828
EF0995	cell division protein FtsQ	ftsQ	M	4		K03589	EF0988-EF1002	0.300662	0.0117717	0.0350804	0.699079	-0.467202	1.62552e-08	-0.411719	2.43059e-05	-0.65687	2.6213e-14
EF3179	conserved hypothetical protein		X	1			EF3179-EF3180	0.292162	0.0133622	0.0347351	0.784292	0.756786	2.66784e-18	0.036219	0.787278	0.595031	4.62601e-07
EF2477	conserved hypothetical protein		S	5			EF2477-EF2479	-0.126762	0.191407	0.0334487	0.706347	-0.203741	0.0128987	0.0523609	0.442515	0.162027	0.0247768
EF1028	hydrolase, alpha/beta hydrolase fold family		R	5		K00433	EF1028	-0.208994	0.0162795	0.0330429	0.736065	0.160462	0.0232214	-0.539765	6.92387e-08	0.0630396	0.451988
EF1258	hypothetical protein		X	5			EF1258	0.00490857	1	0.0326511	0.867358	0.153704	0.279189	-0.546442	0.00253787	-0.300029	0.0667805
EF3294	membrane protein, putative		X	5			EF3294	0.11441	0.121831	0.0313983	0.648047	0.194807	0.000254572	0.182477	0.0163487	-0.0487326	0.496268
EF0689	membrane protein, putative		X	4		K01992	EF0688-EF0689	-0.160952	0.0529439	0.0298232	0.696046	0.611629	1.60049e-24	-0.238132	0.00926653	0.579123	9.17767e-13
EF0997	cell division protein FtsZ	ftsZ	D	4		K03531	EF0988-EF1002	0.0230356	0.902985	0.029743	0.8729	-0.370101	0.0435081	-0.0354523	0.749028	-0.225855	0.00850609
EF0872	potassium uptake protein		P	2		K03549	EF0872	0.132852	0.208361	0.0292269	0.75029	0.964279	5.5952e-31	0.377315	2.37455e-06	0.710873	2.27325e-19
EF1606	glycosyl hydrolase, family 1		X	5		K01223	EF1606	0.159064	0.0595815	0.0287845	0.716631	-0.0104137	0.900225	0.15462	0.0543465	-0.0399936	0.603526
EF2207	DNA-binding protein, Fis family		TQ	1			EF2207	-0.0554305	0.520874	0.0279547	0.787949	-0.497802	1.07568e-13	-0.118651	0.245041	-0.547176	6.801e-09
EF1948	conserved hypothetical protein		S	5			EF1948	0.0186845	0.900704	0.0276674	0.882721	0.675624	5.30227e-10	-0.00479796	1	0.513524	2.36006e-06
EF0472	nrdI protein	nrdI	F	3		K03647	EF0470-EF0473	0.284226	0.00472121	0.0272456	0.69807	-0.00322106	0.968101	0.117266	0.110716	-0.628598	6.78605e-18
EF1413	msrC protein, putative		R	5		K18231	EF1413	0.295956	0.119246	0.0270204	0.904883	0.729906	3.12175e-05	0.151354	0.421078	0.249131	0.137379
EF3086	conserved hypothetical protein		S	5			EF3086	0.0709911	0.572334	0.0270157	0.829727	0.0260726	0.811684	0.434389	2.63231e-06	0.0867068	0.41367
EF1035	lipoprotein, putative		X	5			EF1035	-0.00033042	0.993753	0.0264126	0.830586	-0.464013	4.33211e-05	-0.468714	0.0025188	0.00563548	0.966274
EF0110	transcriptional regulator, ArsR family		K	1			EF0109-EF0110	0.158854	0.236519	0.0262561	0.858309	0.338959	0.00269989	-0.570174	0.000145622	0.196612	0.126157
EF3174	conserved hypothetical protein		R	1		K07118	EF3174-EF3175	-0.142344	0.222448	0.0260765	0.818757	-0.256824	0.0122699	0.2582	0.025054	-0.0163776	0.88866
EF1791	pheromone binding protein		E	3		K15580	EF1791	0.0656921	0.54602	0.0251927	0.825525	0.12388	0.155749	-0.0893101	0.44142	0.168749	0.117383
EF1189	conserved hypothetical protein		X	3			EF1186-EF1189	-0.0941552	0.401412	0.0249312	0.809375	0.514118	1.53484e-09	0.300967	0.0162293	0.252815	0.0202629
EF1534	peptidyl-prolyl cis-trans isomerase, cyclophilin-type		O	4		K03767	EF1534	-0.0867926	0.264611	0.0239432	0.710956	-0.74535	1.45202e-39	-0.0831693	0.280569	-0.684609	4.45131e-20
EF2599	transcriptional antiterminator, bglG family		K	3		K03488	EF2597-EF2599	-0.17582	0.130413	0.0236728	0.820086	0.412729	4.84967e-07	0.88482	4.60032e-19	0.368523	0.000264987
EF1963	phosphoglycerate kinase	pgk	X	3	2.7.2.3	K00927	EF1962-EF1965	0.0675763	0.736968	0.0222005	0.910029	-0.569779	0.00325926	-0.0912853	0.446034	-0.270236	0.00205593
EF1134	peptidase, M20/M25/M40 family		R	3		K05823	EF1133-EF1134	-0.253276	0.00104876	0.0219497	0.769405	0.0647245	0.292892	0.317453	0.000133108	0.267935	0.00162921
EF2410	GTP-binding protein Era	era	R	1		K03595	EF2409-EF2414	-0.0589069	0.554375	0.0185538	0.833547	-0.254643	0.00175429	0.259254	0.000676869	-0.182172	0.015033
EF2687	conserved domain protein		X	5			EF2687	-0.406244	4.57035e-05	0.0182654	0.8524	0.102802	0.22168	0.501017	8.54528e-08	0.444075	1.99373e-10
EF1744	general stress protein, putative		X	5			EF1744-EF1745	-0.21934	0.169588	0.017886	0.905424	0.281391	0.0813926	0.355105	0.000135085	0.640443	4.82066e-17
EF0644	transcriptional regulator, LysR family		K	1			EF0644	0.020043	0.859289	0.0173552	0.890387	0.25638	0.00586408	-0.320146	0.00833489	0.338726	0.000847999
EF1409	conserved hypothetical protein		CP	3		K01992	EF1408-EF1409	-0.354825	0.000412778	0.0166779	0.853033	-0.233538	0.00349308	0.0991596	0.171143	0.155076	0.0405139
EF1533	conserved hypothetical protein		X	5			EF1531-EF1533	0.885004	2.84093e-11	0.0159775	0.962641	-0.303562	0.0292885	-0.754428	1.7003e-06	-0.756263	1.13825e-08
EF0801	leucyl-tRNA synthetase	leuS	J	1	6.1.1.4	K01869	EF0801	0.0381359	0.831066	0.0159508	0.926966	0.0808036	0.64329	-0.0181255	0.857817	0.156311	0.0466523
EF2698	tellurite resistance protein, putative		P	5			EF2697-EF2701	0.179287	0.161275	0.0147918	0.875645	-0.0930288	0.290227	-0.368639	4.87027e-05	-0.0942157	0.32037
EF2434	phosphosugar-binding transcriptional regulator, RpiR family		K	3			EF2434-EF2437	-0.30364	0.00328602	0.0138017	0.896979	-0.345536	1.55082e-05	-0.00349744	0.975144	-0.0817753	0.420419
EF3297	conserved hypothetical protein		X	1			EF3296-EF3297	0.0320284	0.722623	0.012361	0.88045	-0.614019	2.17481e-16	-0.355878	0.000788252	-0.489668	1.93615e-06
EF2443	ribosomal protein S20	rpsT	J	1		K02968	EF2443	0.0943204	0.581167	0.0123134	0.937969	-0.401895	0.000144191	0.944634	1.44059e-18	-0.635742	3.08766e-11
EF0180	ABC transporter, permease protein		R	3		K02057	EF0173-EF0180	-0.175405	0.250749	0.0117845	0.913063	-0.774894	3.76351e-20	0.145371	0.0905346	-0.712957	1.25764e-21
EF2499	hypothetical protein		X	5			EF2499	0.12231	0.203554	0.00935326	0.932888	-0.188051	0.0255852	0.675668	4.27161e-13	-0.398607	4.98337e-05
EF1186	Ser/Thr protein phosphatase family protein		F	3			EF1186-EF1189	0.046324	0.660148	0.0092285	0.91936	-0.169932	0.0415371	-0.392383	3.72239e-06	-0.150736	0.0577446
EF3125	primosomal protein n	priA	L	4		K04066	EF3125-EF3127	-0.0379275	0.70692	0.00912173	0.922147	-0.331087	5.13468e-05	-0.182401	0.0219527	-0.202439	0.00819733
EF1746	UTP-glucose-1-phosphate uridylyltransferase	galU	M	3	2.7.7.9	K00963	EF1746-EF1747	-0.104083	0.531699	0.00844769	0.958754	-0.757934	1.70354e-21	0.0886417	0.33475	-0.570738	2.11979e-15
EF0792	permease domain protein		X	4		K02004	EF0792-EF0793	-0.14743	0.0705641	0.00819048	0.921351	-0.195211	0.00285297	-0.514452	2.53455e-09	-0.0117309	0.887292
EF0179	ABC transporter, permease protein		R	3		K02057	EF0173-EF0180	-0.145398	0.158144	0.00518335	0.953996	-0.912288	5.68664e-29	0.194394	0.0117928	-0.859581	1.39846e-28
EF1317	N-acetylglucosamine-6-phosphate deacetylase	nagA-1	G	3	3.5.1.25	K01443	EF1317	-0.102393	0.344811	0.00426592	0.964361	0.0594218	0.554525	0.00307704	0.972181	0.11768	0.195716
EF3192	isochorismatase family protein		Q	4			EF3192	-0.168802	0.0625663	0.00312064	0.987567	0.305837	6.68025e-05	0.457947	1.36339e-07	0.164847	0.0562766
EF0064	conserved hypothetical protein		X	3			EF0064-EF0065	0.13056	0.763852	0	0	0.659557	0.0252835	0.0400682	1	0.608188	0.0863164
EF0073	transcriptional regulator, Cro/CI family		X	5			EF0073	0.576349	0.105339	0	0	-0.0465661	1	-0.520738	0.136064	-0.575955	0.0805361
EF0244	acetyltransferase, GNAT family		X	5			EF0244	0.830256	0.0135397	0	0	0	0	-0.0192577	1	-0.755989	0.0128509
EF0434	L-rhamnose isomerase_x0001_	rhaA	X	3	5.3.1.14	K01813	EF0433-EF0436	0	0	0	0	0	0	-0.0436326	0.933616	-0.152597	0.694994
EF0437	transcriptional regulator, AraC family		X	3			EF0437-EF0438	0.566749	0.124959	0	0	0.636791	0.0372258	0.00747191	1	-0.22904	0.517674
EF0953	hypothetical protein		X	5			EF0953	-0.237312	0.516949	0	0	-0.905171	0.0111231	0	0	-0.390053	0.338687
EF1126	PTS system, IIA component		GT	3	2.7.1.69	K02821	EF1125-EF1131	0	0	0	0	0.699225	0.0661885	0	0	0.354328	0.297509
EF1159	PTS system, cellobiose-specific IIB component		G	3	2.7.1.69	K02760	EF1159-EF1161	0	0	0	0	0	0	0.761936	0.0303097	-0.639421	0.0969754
EF1177	hypothetical protein		X	5			EF1176-EF1177	0.308664	0.484139	0	0	0	0	0	0	0.114345	0.794891
EF1532	hypothetical protein		X	5			EF1531-EF1533	0.544493	0.161407	0	0	0	0	-0.793093	0.047174	-0.83981	0.0166583
EF1676	transcriptional regulator, GntR family		K	4			EF1674-EF1676	0.423486	0.194715	0	0	-0.122794	0.820738	-0.326795	0.345301	-0.835538	0.00207828
EF2230	hypothetical protein		X	5			EF2229-EF2230	0	0	0	0	0	0	0	0	-0.291571	0.422842
EF2383	conserved hypothetical protein		S	5			EF2383	0	0	0	0	0.619726	0.0992721	-0.315683	0.577802	-0.432516	0.241933
EF2730	preprotein translocase, SecE subunit	secE	U	1		K03073	EF2729-EF2731	-0.0127347	1	0	0	0.950869	0.00111339	0.331588	0.31246	-0.0497918	0.943934
EF2731	ribosomal protein L33	rpmG-2	J	1		K02913	EF2729-EF2731	1.77797	2.42507e-05	0	0	0	0	-0.600235	0.0925037	-0.474821	0.102832
EF2896	hypothetical protein		X	5			EF2896	0	0	0	0	0.141069	0.757072	0.110643	0.777376	0.18909	0.628308
EF2969	conserved hypothetical protein		X	5			EF2968-EF2969	0.643417	0.0949866	0	0	0.680219	0.0575043	-0.647991	0.11148	-0.166279	0.687948
EF3000	cytosine/purines, uracil, thiamine, allantoin permease family protein		FH	3		K10975	EF3000	0	0	0	0	0	0	0	0	0.139435	0.752459
EF0806	amino acid ABC transporter, permease protein		E	3		K02029	EF0804-EF0806	0.176224	0.485274	-0.000264576	1	0.0907598	0.652739	0.260371	0.319696	-0.00804181	1
EF2473	ribosomal-protein-alanine acetyltransferase, putative		R	4		K03789	EF2472-EF2475	-0.155712	0.162669	-0.000630791	1	-0.573367	1.17121e-09	-0.214867	0.0850881	-0.866063	3.63311e-15
EF0401	pyrrolidone-carboxylate peptidase	pcp	O	5	3.4.19.3	K01304	EF0398-EF0401	-0.29003	0.0123451	-0.00144278	0.992561	-0.247584	0.114547	0.154452	0.0824811	0.0673624	0.386377
EF0682	DNA repair exonuclease family protein		L	5		K03547	EF0681-EF0684	0.261252	0.00819506	-0.00205842	0.974723	-0.556817	7.54514e-22	0.291869	9.12152e-05	-0.792631	1.51535e-25
EF0258	polysaccharide biosynthesis family protein		R	1		K03328	EF0256-EF0260	-0.00682216	0.949384	-0.00267069	0.976678	0.611582	2.19127e-14	0.188203	0.0178626	0.715732	1.08669e-18
EF1494	V-type ATPase, subunit K		C	3	3.6.3.14	K02124	EF1492-EF1500	-0.0339922	0.734828	-0.00268899	0.979136	-0.0427961	0.614016	-0.162936	0.0327992	0.216902	0.00411994
EF0889	conserved hypothetical protein		X	5			EF0884-EF0890	-0.0192675	0.814324	-0.00415725	0.966145	0.069176	0.325464	0.129614	0.233176	0.0214114	0.783471
EF2425	phosphoglucomutase/phosphomannomutase family protein		G	3		K01835	EF2425	0.0965947	0.579311	-0.00453431	0.978852	-0.319466	0.051032	-0.306641	0.000993171	-0.397231	1.21041e-07
EF2409	DNA repair protein RecO, putative		L	1		K03584	EF2409-EF2414	0.245991	0.136295	-0.00515629	1	0.112842	0.492579	0.773887	1.62981e-07	-0.682749	1.89683e-05
EF3016	conserved hypothetical protein		X	5			EF3016	-0.151105	0.141777	-0.00518441	0.975489	0.0948318	0.26241	0.231016	0.0203717	0.0954761	0.318729
EF1975	conserved hypothetical protein TIGR00046		S	5		K09761	EF1975-EF1978	0.0987802	0.205849	-0.0062032	0.930742	-0.622917	2.45944e-23	0.39479	5.42108e-07	-0.629861	4.41848e-16
EF0386	carbamate kinase	arcC-2	E	3	2.7.2.2	K00926	EF0386-EF0387	-0.201191	0.417294	-0.00629163	1	0.723448	0.000843352	0.289402	0.363823	0.6543	0.000859456
EF3122	Sun protein	sun	J	4	2.1.1.-	K03500	EF3117-EF3123	0.0151231	0.880947	-0.00637181	0.94706	-0.740406	4.78582e-18	-0.0066968	0.931847	-0.707127	1.37364e-22
EF1541	conserved hypothetical protein		S	5			EF1541	0.0443661	0.813066	-0.00686083	0.971422	0.217741	0.2287	-0.0503401	0.656616	0.164434	0.104934
EF2741	lipoate-protein ligase A	lplA-2	H	4	6.-.-.-	K03800	EF2741-EF2742	-0.177615	0.0660145	-0.00738662	0.934643	-0.280618	0.000529393	-0.0414871	0.541176	-0.118181	0.0861988
EF2590	conserved hypothetical protein		V	4			EF2590	0.0156149	0.850941	-0.00819941	0.919368	0.236702	7.5129e-05	-0.329434	9.36486e-05	0.105154	0.224467
EF1679	carboxyl-terminal protease		M	5	3.4.21.-	K03797	EF1678-EF1684	0.00903385	0.93034	-0.00875578	0.927203	0.482112	3.25715e-09	-0.150372	0.0633536	0.599518	3.25593e-14
EF2670	inorganic polyphosphate/ATP-NAD kinase, putative		G	3		K00858	EF2670-EF2671	0.0337792	0.666565	-0.00941918	0.900086	-0.877528	4.40482e-39	-0.735795	1.98468e-19	-0.908642	1.33101e-29
EF0445	naphthoate synthase	menB	H	4	4.1.3.36	K01661	EF0445	-0.265456	0.0116712	-0.0104268	0.914158	-0.637433	5.88901e-13	-0.00799154	0.92135	-0.459204	8.44252e-09
EF2970	conserved domain protein		X	5			EF2970	-0.424685	0.0139033	-0.011331	0.93351	-0.205477	0.137457	0.228889	0.164549	0.0175164	0.928949
EF2680	ABC transporter, ATP-binding/permease protein		V	4		K06147	EF2680	-0.136218	0.192214	-0.0119232	0.884781	0.495783	1.09756e-10	0.0512035	0.633133	0.404592	7.82326e-06
EF2411	diacylglycerol kinase	dgkA	X	1	2.7.1.107	K00887	EF2409-EF2414	-0.131832	0.0786941	-0.0123459	0.878372	-0.263255	2.70057e-05	0.20535	0.00838464	-0.202195	0.00642115
EF0880	dephospho-CoA kinase, putative		H	1		K00859	EF0878-EF0880	0.0794639	0.376736	-0.0135171	0.869815	-0.107399	0.086916	-0.165371	0.0704065	-0.0546254	0.558081
EF2081	ABC transporter, permease protein		P	2		K02072	EF2079-EF2082	0.979479	0.00013629	-0.0145761	1	0.305901	0.233944	-0.18683	0.420866	-0.87578	6.11281e-06
EF2757	conserved hypothetical protein TIGR00245		R	5		K02069	EF2757-EF2764	0.0587729	0.539177	-0.0148355	0.889543	0.435686	9.98002e-09	0.57087	2.01988e-10	0.323844	0.00018484
EF2419	conserved hypothetical protein		X	5		K09773	EF2419	-0.0742451	0.337708	-0.016795	0.831452	-0.12519	0.0575459	-0.0606121	0.538388	-0.0106701	0.9021
EF1761	cell division ATP-binding protein FtsE	ftsE	D	4		K09812	EF1760-EF1761	0.121893	0.239745	-0.0173503	0.865065	-0.364638	3.98861e-05	0.0577436	0.468089	-0.555494	5.34422e-14
EF2700	MutT/nudix family protein		F	3			EF2699-EF2700	-0.322154	0.000510368	-0.0182573	0.832408	-0.0843256	0.287686	-0.0802617	0.339645	0.209793	0.00790615
EF2050	ABC transporter, ATP-binding protein		V	4		K11635	EF2049-EF2050	-0.375373	2.02522e-05	-0.0184615	0.811795	-0.648076	1.18766e-24	-0.906903	6.93714e-19	-0.31541	0.000500721
EF3315	CitG family protein		H	4		K05966	EF3315-EF3316	0.0190122	0.854296	-0.0197113	0.84983	0.426227	2.61474e-08	-0.0510478	0.612425	0.293308	0.000589957
EF1572	hypothetical protein		X	5			EF1571-EF1572	-0.246514	0.0110755	-0.019792	0.852284	-0.350777	1.29201e-05	-0.252732	0.0236691	-0.192759	0.0272978
EF2876	acetyl-CoA carboxylase, carboxyl transferase beta subunit	accD	I	3	6.4.1.2	K01963	EF2875-EF2886	-0.515382	0.00502158	-0.0209018	0.909043	-0.18337	0.308692	0.28678	0.00415481	0.270323	0.000579588
EF0864	glycine betaine/carnitine/choline ABC transporter, permease protein		E	3		K05846	EF0862-EF0865	-0.0390701	0.699242	-0.0210748	0.813386	0.0910764	0.258546	-0.0859231	0.279648	0.188826	0.0161297
EF2620	preprotein translocase, SecG subunit	secG	U	4		K03075	EF2616-EF2620	-0.299776	0.000530638	-0.021164	0.824266	-0.427249	2.9781e-07	-0.349759	0.000149528	-0.293985	0.000298054
EF1269	cell wall surface anchor family protein		M	4			EF1269	0.282061	0.000410072	-0.0220083	0.822453	-0.0474687	0.466433	-0.0390365	0.66711	-0.158189	0.0447642
EF0686	hypothetical protein		X	3			EF0686-EF0687	0.12027	0.334962	-0.0224912	0.81636	-0.208897	0.00127982	-0.602774	7.70562e-08	-0.133955	0.245625
EF0913	transposase, putative		L	1		K07496	EF0913	0.0927878	0.411132	-0.022587	0.817736	-0.368966	1.70478e-05	0.0420086	0.650039	-0.426845	3.93286e-06
EF0845	UDP-N-acetylmuramoylalanyl-D-glutamyl-2,6-diaminopimelate--D-alanyl-D-alanyl ligase	murF	M	4	6.3.2.15	K01929	EF0845	0.0712123	0.516381	-0.022617	0.825381	-0.620782	1.15628e-11	0.155451	0.073597	-0.78786	5.47682e-23
EF1260	DNA-binding response regulator		TK	2			EF1260-EF1261	0.0402153	0.621297	-0.0230521	0.761264	-0.0425379	0.503478	-0.0510388	0.508312	-0.0633881	0.399277
EF1340	pheromone cAM373 precursor lipoprotein		X	5			EF1340	0.527339	9.36129e-11	-0.0231463	0.817209	-0.361817	3.71719e-07	-0.206591	0.0146517	-0.82128	6.05332e-21
EF2052	cell division protein, FtsK/SpoIIIE family		D	4		K03466	EF2052	-0.0760635	0.679195	-0.0236927	0.896648	0.365434	0.0474082	-0.12162	0.212398	0.507517	4.18375e-11
EF2868	conserved hypothetical protein		QR	5			EF2866-EF2868	0.0705344	0.469724	-0.0245984	0.785446	0.0141832	0.866802	0.283071	0.000554101	-0.234794	0.00134786
EF2228	tryptophanyl-tRNA synthetase		J	1		K01867	EF2228	-0.0182177	0.857235	-0.0250731	0.787039	-0.799736	2.32388e-37	-0.142215	0.0819778	-0.854726	3.11793e-31
EF0648	nitroreductase family protein		C	3			EF0648	0.112861	0.647228	-0.0251535	0.96376	0.929512	1.08764e-08	-0.166154	0.562024	0.806683	5.94109e-05
EF0358	glyoxalase family protein		E	5		K15975	EF0356-EF0358	-0.0433736	0.670386	-0.0252811	0.828973	0.749871	1.81171e-22	-0.416055	0.000306795	0.878774	2.41649e-23
EF2498	ABC transporter, ATP-binding protein		P	2		K02071	EF2496-EF2498	0.156362	0.0419581	-0.0256576	0.727072	-0.153177	0.0101618	-0.243213	0.00314821	-0.26572	0.000370597
EF2432	metallo-beta-lactamase superfamily protein		R	5			EF2432	0.00864334	0.905022	-0.0271375	0.743747	-0.157216	0.018467	0.0997154	0.219084	-0.177446	0.0185323
EF0452	AMP-binding family protein		I	3			EF0452	-0.0441919	0.801045	-0.0272442	0.874438	-0.898176	5.14287e-08	-0.0529151	0.585437	-0.720999	3.30014e-22
EF2416	ribosomal protein S21	rpsU	J	1		K02970	EF2415-EF2416	-0.228584	0.266753	-0.0272616	0.890591	-0.202426	0.308653	0.144303	0.201715	0.0557237	0.591806
EF2154	conserved hypothetical protein		S	2		K16924	EF2152-EF2154	0.0886446	0.306277	-0.0283152	0.696556	0.000165528	0.998534	0.333833	2.10919e-05	-0.0498679	0.575295
EF0455	PTS system, IIC component		X	5		K02795	EF0455-EF0461	-0.296761	0.292415	-0.0316658	0.924699	-0.0175416	0.969605	0.21923	0.454207	0.859595	0.000105349
EF1564	chorismate synthase	aroC	X	3	4.6.1.4	K01736	EF1561-EF1569	-0.359906	0.000470818	-0.0329917	0.724975	-0.134694	0.106566	0.509906	2.13782e-10	0.298855	6.66171e-05
EF0899	conserved hypothetical protein		X	5			EF0899	-0.202319	0.083533	-0.0330915	0.74683	0.286158	0.0063485	0.35276	0.000977039	0.370914	0.000166395
EF2866	conserved hypothetical protein TIGR01033		X	5			EF2866-EF2868	0.00850104	0.930239	-0.0332906	0.721344	-0.532941	2.34999e-11	-0.272096	0.000321495	-0.638182	2.70597e-17
EF1725	formate--tetrahydrofolate ligase	fhs	F	3	6.3.4.3	K01938	EF1725	0.0981566	0.479317	-0.033529	0.698502	0.127968	0.415259	-0.307368	0.000405021	0.130051	0.0824184
EF2689	exonuclease SbcC	sbcC	L	1		K03546	EF2688-EF2690	-0.0876953	0.6435	-0.0339531	0.846307	-0.0191033	0.912055	-0.0749403	0.554924	0.140847	0.203746
EF0685	rotamase family protein		O	4		K07533	EF0685	0.120307	0.55333	-0.0339688	0.855924	-0.228669	0.217985	-0.569119	5.16101e-06	-0.272703	0.0130865
EF0167	GMP synthase	guaA	F	3	6.3.5.2	K01951	EF0167	-0.136766	0.479722	-0.0356868	0.856005	0.213316	0.235847	0.202951	0.0652483	0.250957	0.00295415
EF0878	DNA polymerase I	polA	L	1	2.7.7.7	K02335	EF0878-EF0880	0.153448	0.385454	-0.0358538	0.833401	-0.325432	0.0513297	-0.347838	0.000355645	-0.473817	5.11351e-09
EF0902	phosphomevalonate kinase		I	3	2.7.4.2	K00938	EF0901-EF0904	-0.130214	0.13597	-0.0359126	0.656858	-0.288295	2.49906e-05	0.204901	0.0104114	-0.380985	9.81175e-08
EF3293	inosine-5`-monophosphate dehydrogenase	guaB	F	3	1.1.1.205	K00088	EF3293	-0.142496	0.162783	-0.037015	0.688676	-0.313364	0.000295087	0.2663	0.000486299	-0.167885	0.0256644
EF0980	exodeoxyribonuclease VII, small subunit	xseB	L	1	3.1.11.6	K03602	EF0976-EF0984	0.0183306	0.853105	-0.0371517	0.706423	-0.299145	0.000194572	-0.664624	4.52674e-07	-0.159516	0.0804331
EF3039	conserved hypothetical protein		X	5			EF3039-EF3040	0.060234	0.437136	-0.0371752	0.653758	-0.00355185	0.956347	0.112634	0.150647	-0.0133062	0.857931
EF1390	NAD-dependent formate dehydrogenase, alpha subunit	fdhA	R	2	1.2.1.-	K00123	EF1386-EF1399	-0.0739466	0.66711	-0.0376474	0.839436	-0.00529967	1	-0.120668	0.451341	0.187832	0.181855
EF2400	RNA methyltransferase, TrmH family		J	1		K03437	EF2395-EF2400	0.15342	0.0788016	-0.0379625	0.633545	-0.56549	1.10818e-16	-0.568323	1.24199e-08	-0.761978	5.94001e-16
EF1500	V-type ATPase, subunit D		X	3	3.6.3.14	K02120	EF1492-EF1500	-0.0347319	0.731388	-0.0382562	0.682563	-0.029499	0.71768	0.0612705	0.425639	0.193879	0.0111275
EF0915	ribosomal protein L35	rpmI	X	5		K02916	EF0914-EF0916	0.175137	0.304452	-0.0382985	0.815815	-0.626527	9.0585e-05	-0.000385046	0.997243	-0.793664	1.25197e-26
EF2595	guanylate kinase	gmk-1	F	3	2.7.4.8	K00942	EF2595	-0.114737	0.446899	-0.0388743	0.785999	0.492102	2.66655e-06	0.15815	0.270665	0.457232	0.000706801
EF1188	hydrolase, haloacid dehalogenase family		G	3		K01101	EF1186-EF1189	-0.00617616	0.950948	-0.0390573	0.65867	0.248607	0.00193644	-0.154772	0.0534912	0.311675	9.05985e-05
EF1048	ribosomal protein L32	rpmF-3	J	1		K02911	EF1047-EF1048	-0.11257	0.553403	-0.0404152	0.83023	-0.220575	0.24139	0.150802	0.138874	-0.0981447	0.214148
EF2911	DNA-binding response regulator, LuxR family		TK	2		K11618	EF2911-EF2913	-0.00401692	0.95948	-0.0406303	0.62935	0.297022	3.62833e-06	0.170328	0.0589023	0.247443	0.00146876
EF1683	Lipase/Acylhydrolase, putative		E	5			EF1678-EF1684	0.175826	0.0286555	-0.0413018	0.583885	0.133337	0.0307367	-0.0172879	0.850227	0.0295406	0.735565
EF1792	conserved hypothetical protein		X	5			EF1792	0.359561	0.183097	-0.0413062	1	0.25721	0.341956	-0.659194	0.0204202	0.243355	0.284264
EF2912	sensor histidine kinase, putative		T	2		K11617	EF2911-EF2913	0.0179467	0.848485	-0.0415758	0.585198	0.454115	2.59134e-14	-0.22953	0.0357357	0.280916	0.00191971
EF0032	membrane protein, putative		X	5			EF0032	0.183301	0.0898562	-0.0431655	0.669713	0.75001	5.35793e-16	-0.0633952	0.394867	0.495198	4.50314e-10
EF1571	hypothetical protein		X	5			EF1571-EF1572	-0.347229	0.00165946	-0.0436822	0.755052	-0.514026	4.0925e-05	-0.381585	0.00348109	-0.355258	0.00655376
EF2457	cell division protein, FtsW/RodA/SpoVE family		X	5		K03588	EF2453-EF2458	-0.0286448	0.778346	-0.0437921	0.641292	0.480287	3.86073e-08	0.328209	7.15928e-06	0.44552	3.23091e-10
EF1747	glycerol-3-phosphate dehydrogenase (NAD(P)+)	gpsA	C	3	1.1.1.94	K00057	EF1746-EF1747	0.00832781	0.961547	-0.0452681	0.787023	-0.601857	0.000161984	-0.197531	0.0414365	-0.471836	3.05792e-09
EF1005	iron-dependent repressor		K	1		K03709	EF1004-EF1005	0.0309885	0.758144	-0.0460212	0.50188	-0.517844	3.61571e-21	-0.754701	5.64429e-18	-0.540088	4.39452e-13
EF1908	UDP-N-acetylmuramate--alanine ligase	murC	M	4	6.3.2.8	K01924	EF1908	0.105389	0.285335	-0.0464427	0.594687	-0.597048	1.91468e-13	0.00296633	0.968035	-0.701214	2.20588e-19
EF2192	dTDP-glucose 4,6-dehydratase	rfbB	M	4	4.2.1.46	K01710	EF2191-EF2194	-0.232549	0.201901	-0.0481836	0.793102	-0.281506	0.110906	0.20004	0.0412831	-0.0255272	0.74309
EF1910	conserved hypothetical protein		S	5			EF1910	0.106277	0.198085	-0.0502367	0.554986	0.514414	1.32706e-15	-0.470115	5.07812e-07	0.0947027	0.251474
EF1965	transcriptional regulator, SorC family		K	3		K05311	EF1962-EF1965	0.291186	0.0049113	-0.0512671	0.630475	0.557069	8.12783e-11	0.283293	0.000125075	0.137438	0.0747388
EF1549	GTPase, putative		R	1		K03977	EF1547-EF1549	-0.112523	0.268267	-0.0517396	0.553313	-0.389631	1.37082e-06	-0.0416161	0.584978	-0.394549	3.71338e-07
EF1165	conserved hypothetical protein		X	5		K09767	EF1165	-0.11812	0.240774	-0.0519225	0.567133	0.0873729	0.248763	-0.120692	0.224733	0.184279	0.048077
EF0787	transcriptional regulator, TetR family		K	1			EF0787	0.474655	0.00131597	-0.0522043	0.775862	0.443164	0.00174295	-0.717371	6.5186e-08	-0.232361	0.0335295
EF1498	V-type ATPase, subunit A		C	3	3.6.3.14	K02117	EF1492-EF1500	-0.010948	0.954057	-0.052307	0.775723	-0.0259832	0.886257	-0.139519	0.204341	0.239605	0.00726609
EF2782	galactose-1-phosphate uridylyltransferase, putative		G	3		K00965	EF2782-EF2783	-0.0826878	0.421609	-0.0542386	0.547778	-0.117072	0.162816	-0.210396	0.0124927	0.0836009	0.309915
EF0392	hypothetical protein		X	5			EF0392	0.127047	0.310435	-0.0551937	0.665153	-0.169663	0.112565	-0.252167	0.0515598	-0.102943	0.365841
EF1366	conserved hypothetical protein		S	5			EF1365-EF1366	0.102394	0.314721	-0.0554227	0.576062	0.577742	4.74273e-11	-0.195708	0.0118237	0.322648	1.02399e-06
EF1784	phosphoribosylformylglycinamidine synthase, PurS protein	purS	F	3	6.3.5.3	K01952	EF1777-EF1786	0.394451	0.0172432	-0.0563068	0.804735	0.54769	0.000515578	-0.306407	0.0969995	0.28946	0.0448132
EF2361	adenylosuccinate lyase	purB	F	3	4.3.2.2	K01756	EF2361	-0.217672	0.0390385	-0.0569945	0.52794	0.0311574	0.707756	0.166749	0.0265795	0.0920965	0.299022
EF0013	replicative DNA helicase	dnaB	L	1	3.6.1.-	K02314	EF0011-EF0013	0.0433673	0.663579	-0.058599	0.407818	0.573553	1.2368e-11	0.657209	1.53292e-19	0.377399	1.1166e-07
EF1587	MutT/nudix family protein		F	3			EF1587	0.104702	0.554134	-0.0586699	0.787762	0.79081	1.28986e-07	0.131551	0.432562	0.362228	0.0303545
EF3181	hypothetical protein		X	5			EF3181-EF3182	-0.00098888	0.997546	-0.0587153	0.502805	0.887163	3.91428e-42	-0.176836	0.0519382	0.667746	1.32091e-15
EF1558	poly A polymerase	papS	J	1	2.7.7.19	K00974	EF1556-EF1559	-0.0732534	0.493182	-0.0590554	0.524497	-0.198135	0.0212404	-0.330328	3.35032e-05	-0.111845	0.183846
EF1646	heat shock protein HslVU, ATPase subunit HslU	hslU	O	4		K03667	EF1644-EF1648	-0.0518782	0.60084	-0.0609083	0.485227	0.146356	0.137004	-0.486777	7.38152e-10	0.273061	0.000542627
EF2972	amidinotransferase family protein		E	3			EF2972	-0.04531	0.592307	-0.0610178	0.454902	0.394711	1.23924e-05	0.048291	0.568385	0.426602	4.54152e-09
EF1647	heat shock protein HslV	hslV	O	4	3.4.99.-	K01419	EF1644-EF1648	0.272168	0.00157151	-0.0613744	0.476387	0.269992	5.67339e-05	-0.698604	3.4962e-14	0.102175	0.251042
EF0740	deoxynucleoside kinase		F	3			EF0740	0.0216667	0.823653	-0.0620544	0.585493	-0.275323	5.16645e-05	0.407764	4.6508e-05	-0.532133	6.22278e-08
EF2224	cell wall surface anchor family protein		X	5			EF2224	0.410447	0.000701466	-0.0631899	0.434785	-0.306363	0.000158595	-0.583513	4.56358e-06	-0.691942	2.10958e-08
EF2146	membrane protein, putative		X	5			EF2146	0.268823	0.00499261	-0.0657363	0.572675	0.317439	0.000214047	-0.213191	0.0199887	-0.279542	0.00117408
EF1513	pheromone binding protein		E	3		K15580	EF1511-EF1513	-0.0310601	0.861085	-0.0660752	0.756929	0.35164	0.0158857	-0.261014	0.140932	0.379191	0.0056381
EF1964	glyceraldehyde 3-phosphate dehydrogenases	gap-2	G	3	1.2.1.12	K00134	EF1962-EF1965	-0.0969603	0.627459	-0.0663496	0.737098	-0.219095	0.262208	0.199276	0.0768904	0.125915	0.156469
EF1255	ABC transporter, ATP-binding protein		R	5		K05833	EF1253-EF1255	0.0847717	0.381048	-0.0675725	0.474261	0.26796	0.000154711	0.0819991	0.432247	0.404272	3.85286e-05
EF3151	conserved hypothetical protein		R	5			EF3150-EF3151	0.0320658	0.747623	-0.067639	0.477985	-0.549647	3.47742e-11	-0.0439392	0.556106	-0.517316	4.43007e-13
EF1010	sigma-54 interaction domain protein		KT	1			EF1008-EF1010	0.0874327	0.314311	-0.0681982	0.417413	-0.0961016	0.190898	0.127663	0.140899	-0.323929	8.52803e-05
EF0726	glutamyl-tRNA(Gln) amidotransferase, B subunit	gatB	J	1	6.3.5.-	K02434	EF0724-EF0727	-0.0555254	0.776996	-0.0696296	0.715709	-0.0314578	0.858556	-0.192066	0.0715198	0.118997	0.159301
EF0250	maltose O-acetyltransferase, putative		E	1		K00661	EF0249-EF0251	-0.111331	0.139181	-0.069683	0.306461	0.338279	6.60558e-05	0.0359097	0.641046	0.500385	1.92963e-11
EF3266	Ham1 family protein, putative		F	4		K02428	EF3264-EF3269	-0.072131	0.512537	-0.0697576	0.399434	0.336616	9.62326e-08	-0.00728578	0.951719	0.521398	5.27856e-06
EF2585	mur ligase family protein		M	4		K01928	EF2585-EF2586	0.0521505	0.518596	-0.0699233	0.342229	-0.0452651	0.46833	-0.181149	0.0389392	-0.133735	0.103851
EF2229	conserved domain protein		X	5			EF2229-EF2230	0.214423	0.157884	-0.0709401	0.638266	-0.373324	0.00922571	-0.338076	0.0144236	-0.572316	8.59568e-06
EF3269	dihydroneopterin aldolase	folB	H	4	4.1.2.25	K01633	EF3264-EF3269	-0.0225123	0.848979	-0.071302	0.594749	-0.0639251	0.516485	-0.517378	0.00037861	-0.14843	0.179089
EF1741	catabolite control protein A	ccpA	K	1		K02529	EF1741	-0.200988	0.264283	-0.0721531	0.686985	-0.249108	0.151327	-0.406496	3.48036e-05	-0.120384	0.141601
EF2787	rhodanese family protein		P	5			EF2787-EF2791	-0.262983	0.0170888	-0.0726065	0.503899	-0.321248	0.000728847	-0.00535559	0.95065	0.0689885	0.390082
EF2501	arsenate reductase, putative		P	4		K00537	EF2500-EF2502	-0.104031	0.167368	-0.0732068	0.327824	-0.161448	0.00606328	0.250286	0.00201838	-0.105598	0.164643
EF1379	alanyl-tRNA synthetase	alaS	J	1	6.1.1.7	K01872	EF1379	-0.243096	0.207225	-0.073409	0.696478	-0.111018	0.557811	-0.0947928	0.374349	0.105031	0.211155
EF2412	conserved hypothetical protein TIGR00043		R	1		K07042	EF2409-EF2414	0.00463169	0.964104	-0.0738923	0.42258	-0.291478	0.000678317	-0.11169	0.133221	-0.278566	0.000844461
EF3121	protein phosphatase 2C, putative		T	4		K20074	EF3117-EF3123	0.0750897	0.486064	-0.0745207	0.429189	-0.579482	8.11771e-12	-0.162382	0.0664282	-0.614727	1.39035e-12
EF2733	UDP-N-acetylenolpyruvoylglucosamine reductase	murB	M	4	1.1.1.158	K00075	EF2733-EF2734	-0.0435835	0.575381	-0.0746469	0.28466	-0.59326	4.40795e-22	-0.552371	2.17345e-11	-0.603195	1.46448e-14
EF1143	HD domain protein		R	5		K06885	EF1142-EF1144	0.0458778	0.642364	-0.0752219	0.417138	0.530901	2.63938e-10	-0.278193	0.000147484	0.445823	1.79455e-09
EF1767	competence protein F	comFA	L	1		K02240	EF1767	0.126355	0.564783	-0.0754991	0.82396	0.524008	0.00178446	-0.0296174	0.907287	0.388445	0.0299199
EF0741	conserved domain protein		X	5			EF0741	0.0498501	0.744987	-0.0759749	0.62888	0.246196	0.041675	0.621545	6.05057e-06	0.00405111	0.97055
EF3170	HD/KH domain protein		R	1		K18682	EF3166-EF3172	-0.210509	0.26576	-0.0761649	0.676693	0.770814	6.95175e-05	0.0220398	0.835365	0.94887	1.50945e-21
EF1609	conserved hypothetical protein		S	5			EF1609	0.222927	0.00735945	-0.0765489	0.41767	-0.242303	0.00209246	-0.273769	0.00375383	-0.576331	8.42637e-12
EF1687	adenine phosphoribosyltransferase	apt	F	1	2.4.2.7	K00759	EF1687-EF1688	-0.126874	0.153044	-0.0770734	0.468779	0.394321	1.48826e-07	0.0648989	0.528164	0.22367	0.0138009
EF1295	riboflavin biosynthesis protein RibF	ribF	H	4		K11753	EF1295-EF1296	0.0739435	0.342188	-0.0770942	0.293037	-0.527411	3.12053e-18	-0.11811	0.118769	-0.536446	1.49062e-11
EF2458	conserved hypothetical protein		X	5			EF2453-EF2458	-0.171883	0.0486326	-0.077256	0.31937	0.208254	0.00107228	0.162722	0.0901868	0.398173	1.80159e-06
EF0408	PTS system, IIA component		G	3	2.7.1.69	K02798	EF0406-EF0408	-0.0956361	0.459063	-0.0777989	0.543849	0.186044	0.0668444	0.351157	0.00230363	0.118947	0.284928
EF0247	amino acid ABC transporter, amino acid-binding/permease protein		ER	3		K17073	EF0246-EF0247	0.0925939	0.345663	-0.0778587	0.392669	-0.492959	7.34614e-09	-0.295889	9.59598e-05	-0.547594	2.12955e-15
EF0196	site-specific recombinase, resolvase family		L	1			EF0196	-0.1194	0.132032	-0.0783023	0.353083	-0.272016	9.09434e-05	0.349779	8.55082e-06	-0.21976	0.00475121
EF3279	peptidase, U32 family		X	5		K08303	EF3278-EF3280	0.00750919	0.939195	-0.0791243	0.395482	-0.0994108	0.229882	-0.114841	0.149292	-0.142149	0.0386524
EF0794	conserved hypothetical protein		X	5			EF0794-EF0796	0.164674	0.0617863	-0.0797627	0.305626	0.545407	1.76387e-17	-0.148623	0.0895123	0.346033	3.5469e-05
EF1790	YjeF-related protein		G	3		K17758	EF1790	-0.0763088	0.384254	-0.0798403	0.379744	0.544459	8.44962e-17	-0.0871552	0.389771	0.741511	1.55668e-18
EF0991	penicillin-binding protein C	pbpC	M	4		K12556	EF0988-EF1002	0.119555	0.490777	-0.0800563	0.628565	-0.410152	0.010305	0.012525	0.898809	-0.427779	1.40376e-07
EF1270	conserved hypothetical protein		S	1		K09748	EF1270-EF1275	0.23842	0.0275373	-0.081842	0.259236	-0.704607	6.01784e-35	-0.4248	3.14689e-06	-0.975669	5.80498e-29
EF1116	phenylalanyl-tRNA synthetase, beta subunit	pheT	J	1	6.1.1.20	K01890	EF1115-EF1116	-0.0488702	0.790543	-0.0819253	0.64895	-0.472914	0.00688918	-0.128256	0.196537	-0.285685	0.000289717
EF0639	low temperature requirement C protein, putative		I	3			EF0639	-0.122608	0.195541	-0.0823322	0.362961	0.669827	1.05023e-25	0.0821837	0.41046	0.886712	6.00106e-24
EF0406	PTS system, IIBC component		G	3	2.7.1.69	K02799	EF0406-EF0408	-0.127866	0.253557	-0.0824277	0.454011	0.70776	1.84891e-21	0.0990089	0.458846	0.605355	3.71739e-09
EF0661	oligoendopeptidase F, putative		E	3			EF0661	-0.285325	0.110767	-0.0827388	0.631287	-0.0378375	0.825155	-0.119693	0.241656	0.412357	2.57571e-06
EF2466	conserved domain protein		M	5			EF2465-EF2467	0.00248092	1	-0.0837363	0.554794	0.628783	7.66541e-11	-0.55572	4.43581e-05	0.610264	3.14444e-08
EF3048	conserved hypothetical protein		X	5		K03478	EF3048	0.0608473	0.794622	-0.0849314	0.674132	0.837799	5.45822e-08	-0.213667	0.419244	0.484987	0.00302132
EF0789	ABC transporter, ATP-binding/permease protein		V	4		K18891	EF0789-EF0790	0.146352	0.0674385	-0.0863638	0.226161	-0.552524	9.05711e-17	-0.269923	0.00173297	-0.748063	3.31781e-20
EF1026	conserved hypothetical protein		X	5		K09773	EF1025-EF1026	-0.169708	0.113884	-0.0870068	0.470107	-0.519517	9.3538e-08	0.173089	0.158857	-0.297895	0.0138438
EF1705	phosphate-binding protein		P	2		K02040	EF1705	-0.330951	0.000832306	-0.0878967	0.347269	0.543689	6.13865e-11	-0.148389	0.0530459	0.889172	4.66379e-29
EF2781	DNA polymerase III, gamma and tau subunits	dnaX	L	1	2.7.7.7	K02343	EF2780-EF2781	-0.015989	0.930296	-0.0904084	0.607138	-0.11571	0.499072	-0.157588	0.149855	-0.00931325	0.92362
EF0843	D-alanine--D-alanine ligase		M	4	6.3.2.4	K01921	EF0843	-0.0312569	0.850394	-0.0925258	0.374824	0.422208	0.00907997	0.0577356	0.497752	0.303585	3.96449e-05
EF1566	3-phosphoshikimate 1-carboxyvinyltransferase	aroA	E	3	2.5.1.19	K00800	EF1561-EF1569	-0.505919	1.06003e-06	-0.0933803	0.30202	-0.175378	0.0311029	0.563947	6.24572e-12	0.322578	3.45108e-05
EF1978	DNA-3-methyladenine glycosylase		X	5	3.2.2.-	K03652	EF1975-EF1978	0.0431986	0.64118	-0.0939253	0.278079	-0.54799	4.07062e-11	-0.788712	2.41362e-17	-0.513217	1.03806e-09
EF1936	hypothetical protein		X	5			EF1936	0.00867275	0.929563	-0.0942733	0.299153	-0.25236	0.00224084	-0.303666	4.22369e-05	-0.229395	0.00113674
EF3011	conserved hypothetical protein		X	5			EF3009-EF3012	0.134721	0.65051	-0.0946898	0.842125	0.620053	0.018092	0.0520236	0.875812	0.157552	0.482884
EF0949	phosphotransacetylase	pta	C	3	2.3.1.8	K00625	EF0949	-0.0191778	0.850475	-0.0946992	0.323508	-0.83628	3.1951e-22	-0.111135	0.211894	-0.958569	6.54402e-40
EF0841	conserved domain protein		L	1			EF0841-EF0842	0.0532715	0.595971	-0.0951565	0.202221	0.709034	5.60471e-17	-0.481289	3.05742e-09	0.496021	3.77091e-11
EF1197	metallo-beta-lactamase YycJ		R	2			EF1193-EF1197	0.220655	0.0217844	-0.0962369	0.276049	0.189554	0.0222357	-0.041804	0.542639	-0.0683324	0.343719
EF2932	AhpC/TSA family protein		O	4		K11065	EF2932	-0.143631	0.159451	-0.096357	0.301317	0.259192	0.00182778	-0.240338	0.00290551	0.296555	0.000165032
EF1682	conserved hypothetical protein		X	5			EF1678-EF1684	0.0705562	0.389923	-0.0964422	0.24567	0.0823737	0.183195	0.116982	0.188716	0.0113531	0.889533
EF1782	phosphoribosylformylglycinamidine synthase II	purL	F	3	6.3.5.3	K01952	EF1777-EF1786	0.532356	6.9031e-10	-0.0973751	0.270124	0.816091	4.0159e-42	-0.213862	0.0260619	0.486335	1.72587e-08
EF0875	copper-translocating P-type ATPase		P	2	3.6.3.4	K01533	EF0875	-0.263016	0.111579	-0.0978246	0.503806	0.207848	0.198996	-0.217102	0.00223349	0.476587	9.25208e-11
EF2926	DNA repair protein RadC	radC	L	1		K03630	EF2926	0.198129	0.430744	-0.0986939	0.752478	0.0069821	1	0.532996	0.0264776	-0.221805	0.337343
EF1495	V-type ATPase, subunit E		X	3	3.6.3.14	K02121	EF1492-EF1500	-0.0774297	0.488366	-0.098841	0.32886	-0.137208	0.114486	-0.309166	0.000426568	0.246356	0.00983717
EF0089	conserved domain protein		M	4			EF0089	0.187679	0.128649	-0.0990235	0.310487	0.771053	5.57194e-29	-0.202912	0.112973	0.495628	4.99621e-05
EF2423	transcriptional regulator, ArsR family		K	1		K22043	EF2423	-0.0681946	0.388533	-0.10045	0.231596	0.194752	0.00322107	-0.56519	5.76533e-10	0.372529	7.14234e-07
EF0982	hemolysin A	tlyA	J	1		K06442	EF0976-EF0984	-0.0499192	0.625414	-0.100773	0.307672	-0.0456831	0.596195	0.233626	0.00243469	-0.017015	0.811846
EF2752	ABC transporter, ATP-binding protein		V	4		K02003	EF2751-EF2752	-0.26115	0.00672822	-0.100785	0.300107	0.34122	1.29204e-05	-0.000254166	1	0.587787	4.70197e-12
EF1774	conserved hypothetical protein		S	5			EF1774	0.105714	0.240166	-0.100897	0.361745	0.895186	4.9707e-34	0.0480737	0.607014	0.637589	1.91402e-16
EF2742	conserved hypothetical protein		R	4			EF2741-EF2742	-0.103953	0.280384	-0.101639	0.287758	-0.499604	2.1051e-09	-0.339868	1.62742e-06	-0.341744	6.98795e-07
EF1823	N-acetylmuramoyl-L-alanine amidase, family 4		R	5			EF1823	-0.242897	0.099224	-0.104544	0.602047	0.436976	0.00463611	0.115481	0.442831	0.600581	2.33711e-05
EF0977	N utilization substance protein B	nusB	K	1		K03625	EF0976-EF0984	0.119062	0.250903	-0.10472	0.326751	-0.0494171	0.594036	0.482492	8.15171e-11	-0.347587	3.48213e-07
EF1415	glutamate dehydrogenase	gdhA	E	3	1.4.1.4	K00262	EF1415	-0.33617	0.00525343	-0.104914	0.320548	0.0884164	0.580851	0.11054	0.177934	0.444365	1.51372e-07
EF1049	6-phosphogluconate dehydrogenase, decarboxylating	gnd	G	3	1.1.1.44	K00033	EF1049	-0.221483	0.251588	-0.104991	0.57957	-0.0979934	0.577421	0.175859	0.0835153	0.0997773	0.197472
EF1499	V-type ATPase, subunit B		C	3	3.6.3.14	K02118	EF1492-EF1500	-0.0298815	0.873251	-0.105438	0.555978	-0.027633	0.877241	-0.0779494	0.463187	0.270339	0.00212952
EF1565	prephenate dehydrogenase		E	3	1.3.1.12	K04517	EF1561-EF1569	-0.444554	3.01281e-05	-0.106655	0.238572	-0.146402	0.0948677	0.47172	3.98295e-08	0.365432	4.90462e-05
EF2453	conserved hypothetical protein		X	5			EF2453-EF2458	-0.0509095	0.484741	-0.106852	0.123492	0.251575	8.0802e-06	0.0729114	0.357966	0.145255	0.0560293
EF0257	transcription-repair coupling factor	mfd	LK	1		K03723	EF0256-EF0260	0.148101	0.381888	-0.106855	0.511603	0.503319	0.00272576	-0.0183295	0.844944	0.391166	2.15438e-07
EF1152	conserved hypothetical protein		L	3		K07444	EF1152-EF1153	0.0177252	0.866234	-0.109039	0.233539	-0.347069	6.41682e-05	-0.138427	0.0686748	-0.278652	0.000850742
EF0934	hydrolase, TatD family		L	1		K03424	EF0934-EF0936	0.00151491	0.992311	-0.109139	0.146123	-0.331438	9.5669e-09	-0.495204	3.67049e-09	-0.344948	7.1879e-06
EF2640	transcriptional regulator, GntR family		P	2			EF2639-EF2640	-0.0818571	0.389545	-0.109702	0.187512	0.573573	6.18833e-17	0.0144896	0.880522	0.59792	2.56943e-13
EF1669	glyoxylase family protein		E	3		K15975	EF1668-EF1670	0.0539563	0.698034	-0.111593	0.499804	0.322542	0.00728463	-0.62206	7.54297e-05	0.397608	0.00102371
EF2161	GTP-binding protein		R	1		K03665	EF2161-EF2163	-0.101889	0.320006	-0.112437	0.239752	-0.392519	7.09237e-06	0.41233	2.49291e-08	-0.407686	2.35441e-08
EF1328	transcriptional regulator, GntR family		K	1		K03710	EF1328	-0.144293	0.0557759	-0.112872	0.0796169	-0.0545966	0.508125	-0.0859816	0.256452	0.120598	0.0916528
EF0984	DNA repair protein RecN	recN	L	1		K03631	EF0976-EF0984	-0.0768473	0.42466	-0.113293	0.200263	-0.210205	0.00896914	-0.0708578	0.311417	-0.0687644	0.314257
EF1563	3-dehydroquinate synthase	aroB	E	3	4.6.1.3	K01735	EF1561-EF1569	-0.329138	0.00213165	-0.113744	0.226338	-0.0385785	0.654912	0.525118	1.75195e-09	0.410704	1.17518e-06
EF2626	nicotinate phosphoribosyltransferase, putative		H	4		K00763	EF2625-EF2626	-0.105019	0.285395	-0.114025	0.214973	-0.621949	2.91119e-13	-0.457477	9.6745e-11	-0.394836	2.74177e-08
EF0259	S4 RNA-binding domain protein		J	1			EF0256-EF0260	-0.127753	0.109972	-0.114131	0.15213	0.39403	5.40126e-09	0.386848	2.21546e-06	0.644121	3.76558e-15
EF3257	oxidoreductase, pyridine nucleotide-disulfide family		C	3		K03885	EF3257	-0.21033	0.278855	-0.114771	0.542904	-0.723652	0.000104505	0.0845765	0.499811	-0.631918	3.62396e-08
EF1574	Na+/H+ antiporter, putaive		P	2		K03316	EF1573-EF1574	-0.129812	0.223795	-0.115346	0.189342	-0.404054	1.17208e-06	0.151975	0.0698036	-0.57133	8.43803e-12
EF2604	conserved hypothetical protein		X	5			EF2604	-0.309745	0.0385792	-0.116145	0.310461	-0.965566	4.7039e-32	-0.0586513	0.75088	-0.884153	5.10995e-08
EF0966	transcriptional regulator, MerR family		S	5			EF0966	-0.132626	0.134461	-0.116635	0.219692	0.152019	0.0300347	0.0786408	0.399811	0.321176	0.000437929
EF3329	DNA-binding response regulator		TK	1			EF3329	0.0251292	0.808386	-0.116686	0.204982	0.109244	0.115715	0.0590545	0.574702	-0.153363	0.117202
EF0884	conserved hypothetical protein		X	5			EF0884-EF0890	-0.105937	0.197487	-0.116819	0.149843	-0.43423	2.45694e-10	-0.16067	0.0661853	-0.387615	3.76111e-05
EF2790	small hydrophobic molecule transporter protein, putative		R	5		K19225	EF2787-EF2791	-0.216729	0.0076477	-0.116934	0.15662	0.186389	0.00388278	0.0994746	0.279974	0.432759	1.1945e-07
EF0879	formamidopyrimidine-DNA glycosylase	fpg	L	1	3.2.2.23	K10563	EF0878-EF0880	0.132467	0.247982	-0.11705	0.0745328	-0.11542	0.0292238	0.00850046	0.934274	-0.0817338	0.39054
EF0656	glyoxalase family protein		R	5		K07104	EF0656	0.322396	0.00920029	-0.118819	0.378685	0.0848399	0.415764	-0.583546	0.000460349	-0.381369	0.00135356
EF0728	RNA methyltransferase, TrmA family		J	1		K03215	EF0728	-0.123503	0.224765	-0.120704	0.183267	-0.434491	1.29366e-07	-0.0219222	0.774332	-0.178819	0.0253248
EF2618	carboxylesterase precursor, putative		R	4		K03928	EF2616-EF2620	0.306215	0.00425508	-0.120991	0.241781	-0.0395044	0.663585	-0.539093	2.13143e-11	-0.165878	0.0359295
EF1404	MutS2 family protein		L	4		K07456	EF1402-EF1406	-0.000554546	0.997774	-0.122127	0.472167	0.101459	0.550759	-0.132947	0.230248	0.175301	0.0704554
EF2413	HD domain protein		R	1		K07037	EF2409-EF2414	0.105684	0.52456	-0.123376	0.236707	-0.124804	0.427113	-0.277377	0.00148014	-0.345083	4.70771e-06
EF3298	chromosome partitioning protein ParB family		K	1		K03497	EF3298	-0.0118626	0.909289	-0.124253	0.163524	-0.56865	1.04166e-11	-0.310395	6.5025e-05	-0.478168	8.61127e-10
EF1063	conserved hypothetical protein		T	2		K08968	EF1063	-0.215927	0.0564113	-0.124809	0.247892	0.418346	4.70941e-07	0.203775	0.0986264	0.532747	1.60208e-07
EF3276	conserved hypothetical protein		X	5		K09703	EF3275-EF3277	-0.599278	7.60694e-11	-0.124867	0.239405	-0.450259	5.54228e-11	0.0923948	0.413159	0.0683815	0.479012
EF2877	acetyl-CoA carboxylase, biotin carboxylase	accC	I	3	6.4.1.2	K01961	EF2875-EF2886	-0.476336	0.014088	-0.125188	0.514203	-0.178938	0.315812	-0.0167135	0.868032	0.24979	0.00120812
EF1148	penicillin-binding protein 1A		M	4		K05366	EF1148-EF1149	0.31636	0.0839858	-0.125898	0.47183	4.61417e-05	0.999916	-0.262788	0.0153049	-0.202277	0.0331695
EF0814	transcriptional regulator, GntR family		K	1			EF0814	0.337245	0.0268077	-0.12674	0.538553	0.501	0.000251604	-0.292427	0.0832654	0.108754	0.419067
EF1209	sensory box histidine kinase		T	2		K02476	EF1209-EF1210	-0.428759	0.00661824	-0.126784	0.461829	-0.715977	2.68287e-06	-0.41551	0.00159394	-0.265974	0.0234834
EF1593	ABC transporter, ATP-binding/permease protein		V	4		K06147	EF1592-EF1595	0.272207	0.152616	-0.126897	0.641897	0.552624	0.000200649	0.256729	0.209656	0.168422	0.35479
EF1760	cell division ABC transporter, permease protein FtsX, putative		D	4		K09811	EF1760-EF1761	-0.0273024	0.779534	-0.126898	0.152588	-0.48244	2.95695e-09	0.173435	0.0431301	-0.58904	2.78342e-15
EF1976	ribosomal protein L11 methyltransferase	prmA	J	5	2.1.1.-	K02687	EF1975-EF1978	-0.00915379	0.927792	-0.127251	0.163244	-0.639889	1.10793e-14	-0.0956713	0.204003	-0.531976	9.66825e-13
EF1913	conserved hypothetical protein TIGR00278		X	3		K08998	EF1912-EF1913	-0.444485	0.000391376	-0.128115	0.305724	-0.654794	1.41057e-08	-0.434112	3.8551e-05	-0.168864	0.0523913
EF0027	phosphosugar-binding transcriptional regulator, putative		K	1			EF0027	0.021366	0.870972	-0.12813	0.320377	-0.859889	6.14663e-14	-0.512672	0.00161543	-0.817183	9.69572e-12
EF1183	aspartate-semialdehyde dehydrogenase	asd	E	3	1.2.1.11	K00133	EF1183-EF1185	-0.229719	0.0165107	-0.129112	0.142338	-0.326576	4.67548e-05	-0.0853778	0.207878	0.077256	0.296516
EF2189	conserved hypothetical protein		X	5		K09153	EF2188-EF2190	-0.287986	0.018957	-0.129557	0.262803	0.0198566	0.813209	0.543354	2.47131e-06	0.0292016	0.823484
EF1242	transcriptional regulator, GntR family		K	1			EF1242	0.0584316	0.766274	-0.130022	0.506962	0.142182	0.435029	0.866864	3.13704e-09	-0.086066	0.516902
EF2958	transcriptional regulator, LysR family		K	1			EF2958	0.216176	0.150159	-0.130315	0.453119	0.632532	9.28385e-07	-0.0221938	0.917466	0.138181	0.291637
EF1271	N utilization substance protein A	nusA	K	1		K02600	EF1270-EF1275	0.351672	0.0654607	-0.130493	0.434483	-0.638388	9.53975e-05	-0.466195	0.000121779	-0.944061	3.34938e-18
EF3283	transcriptional regulator CtsR	ctsR	X	4		K03708	EF3282-EF3283	0.212185	0.0124673	-0.130956	0.216951	0.039952	0.575689	-0.591243	1.2909e-10	-0.0725961	0.414203
EF1745	conserved hypothetical protein		R	5			EF1744-EF1745	-0.31737	0.025878	-0.131105	0.334901	-0.0401337	0.73318	0.251492	0.025767	0.498287	3.03473e-08
EF2875	acetyl-CoA carboxylase, carboxyl transferase alpha subunit	accA	I	3	6.4.1.2	K01962	EF2875-EF2886	-0.490881	0.00716623	-0.131145	0.445679	-0.18643	0.27486	0.528505	7.61367e-07	0.121942	0.189249
EF1192	aquaporin Z		X	5		K06188	EF1192	0.431154	0.00021804	-0.131287	0.140783	0.794308	3.89468e-26	0.870453	1.52549e-17	0.332681	0.00199594
EF1392	molybdenum cofactor biosynthesis protein MoaC	moaC	X	2		K03637	EF1386-EF1399	0.245529	0.247319	-0.131575	0.59789	-0.449315	0.0407103	-0.32045	0.139052	-0.143618	0.429064
EF0896	queuine tRNA-ribosyltransferase	tgt	J	1	2.4.2.29	K00773	EF0896-EF0897	-0.310217	0.00181882	-0.133109	0.0591666	0.542929	2.47483e-09	0.17821	0.0626987	0.549763	1.05292e-08
EF3164	PilB family protein		X	5		K07305	EF3164	-0.284553	0.00378727	-0.133751	0.184829	0.415275	2.42273e-08	-0.10917	0.293737	0.875753	5.00524e-22
EF2665	RNA methyltransferase, TrmH family		J	1		K03216	EF2665	0.273274	0.00166294	-0.133755	0.174555	0.00695293	0.929942	-0.244742	0.0106898	-0.523425	1.937e-09
EF2500	GcvH family protein		E	4		K02437	EF2500-EF2502	-0.0692023	0.390815	-0.133981	0.0575296	-0.174177	0.0067928	0.430767	2.61246e-07	-0.160886	0.0394234
EF2786	conserved hypothetical protein		S	5			EF2785-EF2786	-0.422784	2.64739e-05	-0.134376	0.145681	-0.198964	0.019319	-0.209574	0.00683067	0.357967	2.44017e-07
EF2706	RNA methyltransferase, TrmA family		J	1			EF2706	-0.017703	0.850791	-0.134999	0.0943972	0.282027	5.22548e-05	-0.125539	0.138003	0.263257	0.000600221
EF1050	DNA-binding response regulator		TK	2			EF1050-EF1051	0.0575793	0.562955	-0.135342	0.142208	-0.311056	0.000241051	0.106912	0.167426	-0.513854	5.79988e-13
EF2058	transport ATP-binding protein CydD, putative		CO	3		K16012	EF2058-EF2061	-0.0932469	0.628845	-0.135942	0.46199	-0.691704	0.000130727	0.141826	0.191193	-0.605856	4.15512e-12
EF2503	conserved domain protein		X	5			EF2503-EF2504	0.338136	0.000640757	-0.136821	0.300508	-0.161199	0.0478376	-0.378643	0.00232348	-0.612392	5.04617e-10
EF0742	conserved hypothetical protein		X	5			EF0742	-0.160539	0.0608522	-0.137325	0.135535	-0.122082	0.0909336	-0.157497	0.0837911	0.0126806	0.895458
EF1362	conserved domain protein		X	5			EF1362	0.068384	0.404032	-0.138191	0.105998	0.30715	4.58501e-07	-0.174495	0.0618661	0.384457	1.08938e-06
EF2159	glutamine synthetase, type I	glnA	X	1	6.3.1.2	K01915	EF2159-EF2160	-1.10949	3.13053e-09	-0.138534	0.457371	-0.300085	0.10517	0.425595	3.6166e-05	0.908542	3.03046e-30
EF1492	V-type ATPase, subunit F		X	3	3.6.3.14	K02107	EF1492-EF1500	-0.104817	0.2524	-0.138756	0.134371	-0.0564151	0.460658	-0.32284	0.000347273	0.423345	6.62376e-06
EF1372	thioesterase family protein		K	5			EF1371-EF1373	0.0505001	0.608886	-0.138998	0.128236	0.13994	0.094288	-0.132582	0.065177	0.136613	0.0437736
EF1097	hypothetical protein		X	5			EF1097	-0.425546	0.0245249	-0.139608	0.453303	-0.0446905	0.808668	0.268133	0.0163331	0.272114	0.0019183
EF2763	conserved hypothetical protein		S	5			EF2757-EF2764	0.0497034	0.62626	-0.139966	0.136487	0.435667	2.65779e-07	0.206403	0.00695438	0.418817	2.26397e-08
EF1254	ABC transporter, permease protein		R	5		K05832	EF1253-EF1255	-0.0648325	0.617956	-0.140583	0.213006	0.255054	0.000340748	0.0462761	0.745564	0.373098	0.00435507
EF3183	cell wall surface anchor family protein, putative		X	5			EF3183	0.0151552	0.889119	-0.141279	0.105905	-0.735905	2.70358e-23	-0.245148	0.0427363	-0.756669	1.90497e-10
EF2690	exonuclease SbcD	sbcD	L	1		K03547	EF2688-EF2690	-0.0136251	0.884492	-0.141664	0.0985308	0.332179	2.01612e-06	0.299932	0.000969019	0.160859	0.0517823
EF0465	transcriptional regulator		K	1			EF0465	0.211041	0.0293334	-0.142071	0.190343	-0.40462	1.83266e-06	-0.0921202	0.198589	-0.714639	4.2621e-24
EF3182	hypothetical protein		X	5			EF3181-EF3182	0.025275	0.803539	-0.142799	0.158501	0.577184	8.65352e-14	-0.370498	0.00134462	0.54627	1.05989e-08
EF1111	signal peptidase I		U	4		K03100	EF1111	0.0123091	0.883354	-0.142832	0.0975551	0.487547	1.16912e-16	-0.418036	1.63214e-06	0.293225	0.000353935
EF0067	Holliday junction DNA helicase RuvB	ruvB	L	1		K03551	EF0066-EF0067	0.0726313	0.426349	-0.1443	0.0569313	-0.643488	2.89606e-21	0.618988	4.41315e-13	-0.732913	3.69784e-17
EF2371	asparaginyl-tRNA synthetase	asnS	J	1	6.1.1.22	K01893	EF2371-EF2373	-0.157216	0.388295	-0.144612	0.418636	-0.0160434	0.928538	0.0104822	0.915887	0.136077	0.0797411
EF2369	hypothetical protein		X	5			EF2368-EF2369	-0.0869922	0.276218	-0.144732	0.0332152	-0.739885	4.13843e-37	-0.700027	1.16518e-17	-0.722554	8.59407e-22
EF1757	phosphate ABC transporter, permease protein		P	2		K02038	EF1754-EF1759	0.0771451	0.430473	-0.145469	0.113571	-0.720569	3.79554e-17	-0.114252	0.145841	-0.758617	9.16407e-28
EF0238	ABC transporter, ATP-binding protein		P	2		K16787	EF0237-EF0239	-0.182633	0.0179909	-0.145584	0.0292327	-0.17171	0.0388141	-0.289676	0.000350918	-0.13861	0.0628104
EF2789	conserved hypothetical protein		X	5			EF2787-EF2791	-0.232134	0.00914908	-0.146039	0.0983488	0.0926702	0.242865	-0.214225	0.0253082	0.373845	1.67772e-05
EF0171	adenosine deaminase	adD	F	3	3.5.4.4	K01488	EF0171	0.226307	0.0555291	-0.146818	0.290292	0.396675	2.26396e-05	-0.0190689	0.874804	0.171618	0.12424
EF2898	peptidyl-prolyl cis-trans isomerase, cyclophilin-type		O	4		K03768	EF2898	-0.111996	0.218089	-0.147907	0.0354984	0.133578	0.0285586	-0.0556396	0.550578	0.0872795	0.335079
EF2354	conserved hypothetical protein		F	3			EF2353-EF2354	-0.133222	0.143058	-0.148291	0.104092	0.41733	5.39663e-08	-0.02184	0.800184	0.395041	2.37269e-06
EF1763	preprotein translocase, SecA subunit	secA	U	4		K03070	EF1763	-0.0823825	0.66541	-0.149139	0.423506	0.0330274	0.861467	-0.021155	0.835918	0.169031	0.0314848
EF1150	conserved hypothetical protein		X	4			EF1150-EF1151	0.16648	0.0399909	-0.149339	0.0707811	-0.145902	0.0286914	-0.585943	5.12621e-11	-0.246746	0.00261536
EF2193	dTDP-4-dehydrorhamnose 3,5-epimerase	rfbC	M	4	5.1.3.-	K01790	EF2191-EF2194	-0.174981	0.0690138	-0.150126	0.103785	-0.347142	1.66009e-05	-0.0749678	0.268951	-0.200082	0.00578832
EF0823	hypothetical protein		X	5			EF0822-EF0823	-0.151203	0.409086	-0.150911	0.4477	0.698662	1.55263e-07	0.0710985	0.717676	0.889014	6.88881e-10
EF3050	DNA-3-methyladenine glycosylase I	tag-2	X	5	3.2.2.20	K01246	EF3050	0.21327	0.10624	-0.151108	0.458921	0.54288	3.24137e-06	0.139656	0.278826	0.224855	0.0541298
EF2697	conserved domain protein		X	5			EF2697-EF2701	0.0406549	0.614311	-0.151197	0.0483781	-0.0710812	0.310424	-0.631841	8.59555e-13	-0.0240084	0.792923
EF1739	tyrosyl-tRNA synthetase	tryS-2	J	1	6.1.1.1	K01866	EF1739	-0.148125	0.396886	-0.151544	0.379665	-0.736068	6.71131e-06	-0.530311	1.37532e-08	-0.566038	1.99877e-13
EF1632	sensor histidine kinase		T	2		K00936	EF1632-EF1634	-0.0129632	0.865478	-0.151688	0.049644	0.0717986	0.304147	-0.00170898	0.9964	-0.0572195	0.480164
EF3289	DNA-binding response regulator		TK	2			EF3289-EF3290	-0.0308813	0.703036	-0.152272	0.0487395	-0.129948	0.0236175	-0.378852	1.56576e-06	-0.138935	0.0614348
EF1527	GTP-binding protein		R	5		K03979	EF1527	0.0298382	0.792501	-0.15242	0.115707	-0.213607	0.0166094	0.236995	0.0078704	0.140685	0.134644
EF1493	V-type ATPase, subunit I		C	3	3.6.3.14	K02123	EF1492-EF1500	-0.0854527	0.624797	-0.152558	0.36444	-0.0534392	0.748528	-0.304141	0.00203903	0.230627	0.00408127
EF2916	hydrolase, haloacid dehalogenase-like family		R	5		K01091	EF2916	-0.0780439	0.465005	-0.153337	0.166822	0.227787	0.00127459	-0.0433881	0.709662	0.285515	0.00659024
EF1704	sensory box histidine kinase		T	2		K07636	EF1703-EF1704	0.185117	0.0113787	-0.155428	0.0362001	0.77758	2.473e-41	-0.0414238	0.601485	0.312939	1.47669e-05
EF0643	hypothetical protein		X	5			EF0642-EF0643	-0.18843	0.14154	-0.157408	0.278668	0.408979	0.000553408	0.0527205	0.717852	0.476206	0.00113335
EF0680	penicillin-binding protein 2A		M	4		K12555	EF0680	-0.0129919	0.903244	-0.157474	0.0948213	0.00151556	0.989659	-0.274455	0.000994968	0.0620771	0.428461
EF0795	conserved hypothetical protein TIGR01212		R	5		K07139	EF0794-EF0796	0.137459	0.181798	-0.158913	0.107036	0.505331	2.07945e-09	-0.218549	0.00909107	0.244469	0.00144114
EF1567	shikimate kinase	aroK	E	3		K00891	EF1561-EF1569	-0.54907	1.03805e-09	-0.158978	0.0461142	-0.19419	0.00441027	0.638713	1.55452e-11	0.270327	0.00369897
EF2792	conserved hypothetical protein		R	5		K06889	EF2792	-0.123318	0.235324	-0.158993	0.191629	-0.380903	0.000237575	-0.9579	2.23148e-15	-0.173785	0.0727621
EF0700	hemolysin		R	5		K03699	EF0700	0.256507	0.00772007	-0.159704	0.0764204	0.172755	0.0421181	-0.138257	0.076948	-0.242224	0.00106216
EF3045	PTS system, IIB component		X	3	2.7.1.69	K02745	EF3045-EF3046	-0.0146543	1	-0.160109	0.668975	0.201478	0.565072	-0.275811	0.440986	0.181395	0.490823
EF2759	tetrapyrrole methylase family protein		R	5		K07056	EF2757-EF2764	0.184502	0.0381818	-0.160592	0.0776546	0.24561	0.000476253	0.0602151	0.509713	0.0911705	0.325033
EF1639	iron compound ABC transporter, ATP-binding protein		PH	2		K02013	EF1639-EF1641	-0.0160984	0.82345	-0.160593	0.0431106	-0.380732	4.18882e-10	-0.302103	0.000406482	-0.470918	6.762e-09
EF2451	pantetheine-phosphate adenylyltransferase	coaD	H	4		K00954	EF2450-EF2452	-0.0911971	0.38321	-0.161407	0.129237	-0.775733	4.1262e-16	-0.321655	0.000958128	-0.616792	7.54726e-12
EF0278	DNA-3-methyladenine glycosylase I	tag-1	X	5	3.2.2.20	K01246	EF0277-EF0279	-0.0251625	0.852803	-0.161535	0.216736	-0.739087	2.63989e-10	-0.645251	2.81345e-06	-0.721929	6.6092e-10
EF1253	conserved hypothetical protein		R	5		K01989	EF1253-EF1255	0.435689	0.000172291	-0.161778	0.265767	0.300496	0.00265462	-0.591944	3.87256e-06	-0.0173535	0.881495
EF3272	zinc-binding transcriptional regulator, Cro/CI family		E	1			EF3271-EF3273	0.347519	0.000245645	-0.162363	0.124227	0.749497	1.1729e-22	-0.568502	4.49887e-10	0.180604	0.035741
EF1196	conserved hypothetical protein		S	2			EF1193-EF1197	0.203946	0.0454087	-0.162747	0.0261017	0.392549	1.24257e-05	-0.307004	0.000124613	0.0860661	0.281892
EF1648	site-specific recombinase, phage integrase family		L	4		K03733	EF1644-EF1648	0.277432	0.00153646	-0.163648	0.0944523	0.163625	0.0285436	-0.626549	1.99635e-11	-0.236206	0.00505834
EF3169	conserved hypothetical protein TIGR00282		S	1		K09769	EF3166-EF3172	-0.122596	0.225372	-0.164789	0.0756741	-0.118323	0.176862	-0.240844	0.0012671	-0.0741548	0.302575
EF1781	amidophosphoribosyltransferase	purF	F	3	2.4.2.14	K00764	EF1777-EF1786	0.322269	0.00175575	-0.165332	0.125738	0.83436	1.13492e-21	0.104282	0.423342	0.634036	3.60507e-11
EF1249	fibronectin/fibrinogen-binding protein, putative		K	1			EF1249	0.265766	0.0438377	-0.166737	0.0850781	0.0803733	0.38108	-0.473327	4.49153e-05	0.0305081	0.791823
EF0963	hypothetical protein		X	5			EF0962-EF0964	-0.00882603	0.944127	-0.166999	0.230875	0.503051	3.70234e-08	-0.282541	0.0567899	0.526361	0.000135402
EF2788	glucokinase	glcK	KG	5	2.7.1.2	K00845	EF2787-EF2791	-0.256195	0.0103892	-0.167462	0.080091	-0.227875	0.00690959	0.0662972	0.340565	0.0849522	0.243756
EF0260	hypothetical protein		X	1			EF0256-EF0260	0.126096	0.608465	-0.167801	0.559386	0.368239	0.0624404	-0.436481	0.18204	0.422865	0.02945
EF2504	hypothetical protein		X	5			EF2503-EF2504	0.56471	3.49042e-06	-0.168162	0.254908	-0.349568	0.00101981	-0.723417	3.77951e-08	-0.74363	1.70774e-11
EF1749	HPr(Ser) serine kinase/phosphatase	hprK	T	2	2.7.1.-	K06023	EF1748-EF1749	0.0312451	0.756999	-0.168462	0.0666419	-0.444092	2.44821e-07	-0.596346	7.31401e-14	-0.492498	2.92157e-10
EF1576	thymidylate synthase	thyA	X	5		K00560	EF1575-EF1577	-0.185338	0.0661669	-0.168635	0.0594914	-0.424845	2.0026e-07	-0.247362	0.0024838	-0.154867	0.0862619
EF1377	ATP-dependent RNA helicase, DEAD/DEAH box family		LKJ	1		K18692	EF1377	0.223728	0.0824277	-0.168893	0.0666011	0.0103914	0.918066	-0.443362	3.6103e-07	-0.148165	0.0596784
EF3191	lipase, putative		I	3			EF3191	0.00984204	0.906357	-0.169547	0.0737705	0.346439	4.51714e-07	-0.0154549	0.878146	0.309463	0.00034201
EF2460	GTP-binding protein TypA		T	2		K06207	EF2460	0.0312034	0.866604	-0.169651	0.346555	0.405768	0.0283287	-0.189901	0.0556773	0.237837	0.00226603
EF1044	DNA polymerase III, alpha subunit	dnaE	L	3	2.7.7.7	K02337	EF1044-EF1046	-0.0736688	0.44081	-0.169744	0.0548465	0.299982	0.000252334	-0.327072	1.1636e-05	0.206687	0.00501072
EF0454	conserved hypothetical protein		R	5		K07090	EF0454	0.412487	0.175125	-0.170216	0.624297	0.813212	0.00110056	0.0376914	0.929265	0.173048	0.50814
EF2554	peptide chain release factor 1	prfA	J	1		K02835	EF2552-EF2555	-0.0470704	0.624119	-0.171885	0.067963	-0.356991	1.02702e-05	-0.185474	0.0161037	-0.491934	6.41675e-13
EF1338	thioredoxin reductase	trxB	O	4	1.6.4.5	K00384	EF1338	0.014354	0.906168	-0.172245	0.0802219	-0.243752	0.00878843	0.119612	0.201114	-0.283165	0.00226814
EF3057	hypothetical protein		X	2			EF3057-EF3058	-0.109031	0.55727	-0.172346	0.360834	0.539515	0.000950556	0.228144	0.306205	0.27939	0.0954956
EF2190	glycosyl transferase, group 2 family protein		M	5		K00786	EF2188-EF2190	-0.235979	0.0170758	-0.172753	0.0607791	-0.250493	0.00357713	0.281432	0.00010887	-0.180329	0.0104873
EF0861	acetyltransferase, GNAT family		X	5			EF0861	0.307402	0.0736897	-0.172908	0.400577	0.366175	0.0222379	0.266836	0.116574	0.0501587	0.743283
EF2691	1-acyl-sn-glycerol-3-phosphate acyltransferase, putative		I	3		K00655	EF2691	0.248095	0.0058379	-0.176922	0.0952607	-0.458268	7.365e-09	0.0819314	0.427896	-0.879018	6.67021e-15
EF0035	conserved hypothetical protein		S	5		K04750	EF0033-EF0035	0.0156518	0.934483	-0.178015	0.196958	0.754385	2.33018e-15	-0.252267	0.0580938	0.699482	1.34728e-10
EF1187	conserved hypothetical protein		X	3			EF1186-EF1189	-0.00464982	0.966328	-0.178095	0.0601983	0.12373	0.157154	-0.392676	6.03892e-06	0.297406	0.00126195
EF0065	bacterial luciferase family protein		C	3			EF0064-EF0065	0.760682	0.00415409	-0.17816	0.702065	0.876852	0.000682525	-0.349696	0.131779	0.385441	0.03361
EF1224	transcriptional regulator, Cro/CI family		X	5			EF1224	-0.252021	0.0188982	-0.178372	0.204889	-0.672362	1.10104e-13	-0.450834	0.000245011	-0.551679	5.54084e-07
EF1053	ABC transporter, ATP-binding protein		P	2		K02049	EF1053-EF1054	0.290292	0.294689	-0.178766	0.620227	0.856881	0.000234759	-0.14244	0.544803	0.0195713	0.932672
EF2879	acetyl-CoA carboxylase, biotin carboxyl carrier protein	accB	I	3		K02160	EF2875-EF2886	-0.378864	0.0350713	-0.178907	0.317583	-0.113511	0.517626	-0.372317	0.000201196	0.367434	2.09745e-05
EF1691	metallo-beta-lactamase, AtsA/ElaC family		R	5		K00784	EF1689-EF1691	-0.147672	0.13514	-0.179639	0.0516772	0.0407948	0.627102	-0.39293	4.66044e-08	0.176348	0.0144948
EF1740	penicillin-binding protein 1B, putative		M	4		K03693	EF1740	0.241303	0.178128	-0.181347	0.277698	-0.117964	0.474829	-0.242326	0.0186581	-0.383921	8.04522e-06
EF1086	spermine/spermidine acetyltransferase, putative		X	5		K00657	EF1086	0.503807	5.47074e-06	-0.181413	0.18484	-0.118562	0.27981	0.217447	0.045066	-0.532141	4.88957e-08
EF0068	hypothetical protein		X	5			EF0068	0.00881852	0.969093	-0.183022	0.2501	0.0339047	0.803043	0.506559	0.00138444	-0.460875	0.00549472
EF1325	hypothetical protein		X	5			EF1325	-0.0506198	0.595486	-0.183243	0.012009	-0.249092	0.000239482	-0.133982	0.163459	-0.0199622	0.835699
EF0860	membrane protein, putative		E	3			EF0860	0.0015483	0.987652	-0.183355	0.00757343	0.218179	0.0117662	0.0347185	0.645488	0.0806151	0.259999
EF2643	conserved hypothetical protein		S	5			EF2643	-0.155658	0.0829328	-0.183973	0.0527302	0.567	2.98311e-18	-0.027026	0.783282	0.778759	5.94206e-18
EF3117	thiamine pyrophosphokinase		H	4	2.7.6.2	K00949	EF3117-EF3123	-0.0671866	0.382506	-0.184041	0.00711967	0.361657	1.83118e-05	-0.0167108	0.846405	0.364881	4.28514e-07
EF2870	HD domain protein		H	5			EF2870-EF2874	0.210421	0.0300082	-0.184305	0.0428203	-0.471516	1.1923e-08	-0.499015	1.79861e-10	-0.676379	9.05828e-22
EF1562	phospho-2-dehydro-3-deoxyheptonate aldolase, putative		E	3		K03856	EF1561-EF1569	-0.314283	2.12547e-05	-0.184474	0.00958391	0.0455666	0.428125	0.625998	2.68994e-13	0.402287	1.44508e-06
EF2446	conserved hypothetical protein		L	1		K02340	EF2446-EF2449	0.0935437	0.325249	-0.184518	0.0898096	0.0542725	0.466584	-0.452989	0.000299983	-0.270835	0.00430204
EF1391	molybdenum cofactor biosynthesis family protein		H	2		K03750	EF1386-EF1399	0.107573	0.61243	-0.184972	0.459293	0.409107	0.0632261	0.357185	0.0770885	0.290118	0.126496
EF0796	type 2 phosphatidic acid phosphatase family protein		I	5		K19302	EF0794-EF0796	-0.0087903	0.9588	-0.185799	0.144809	0.935369	3.75128e-22	-0.0756169	0.546423	0.449249	2.37766e-06
EF0992	phospho-N-acetylmuramoyl-pentapeptide-transferase	mraY	M	4	2.7.8.13	K01000	EF0988-EF1002	-0.0774015	0.45179	-0.186297	0.0472199	-0.20819	0.0141713	0.29525	0.00184941	-0.203411	0.00447413
EF2705	regulatory protein RecX, putative		R	1		K03565	EF2704-EF2705	0.316935	0.000194082	-0.186365	0.0438997	0.0610874	0.375623	-0.418375	4.96427e-06	-0.169827	0.0538856
EF0791	transcriptional regulator, TetR family		K	1			EF0791	-0.101087	0.1848	-0.18693	0.0089261	0.470275	2.25275e-08	-0.0557292	0.502923	0.387324	7.1202e-08
EF0905	pentapeptide repeat family protein		S	5			EF0905-EF0906	-0.0377957	0.763636	-0.187719	0.111337	0.645227	4.08582e-11	-0.0428784	0.740575	0.137933	0.271196
EF1406	excinuclease ABC, subunit C	uvrC	L	4		K03703	EF1402-EF1406	-0.0575814	0.459783	-0.188634	0.00955026	-0.127208	0.0340626	0.0825489	0.275164	-0.0688167	0.353022
EF2791	5-formyltetrahydrofolate cyclo-ligase family protein		X	5		K01934	EF2787-EF2791	-0.153103	0.0659122	-0.189799	0.0193806	-0.143036	0.0378253	-0.447837	2.82183e-07	0.123159	0.147356
EF1629	ethanolamine ammonia-lyase large subunit	eutB	X	5	4.3.1.7	K03735	EF1629	0.407252	0.0626725	-0.190214	0.481827	0.470486	0.062621	-0.191089	0.395204	-0.414652	0.0687727
EF0891	aspartate aminotransferase, putative		E	3			EF0891-EF0893	0.47579	1.87501e-07	-0.190337	0.0269668	0.842319	8.90829e-34	-0.146325	0.14887	0.600914	2.83412e-12
EF3087	hypothetical protein		X	5			EF3087	0.185626	0.0937537	-0.192	0.113595	0.772824	1.6538e-18	0.509448	8.28573e-06	0.65821	5.72906e-11
EF2182	ABC transporter, ATP-binding protein		GM	4		K09693	EF2178-EF2183	0.109883	0.261106	-0.193158	0.0293385	-0.0777018	0.338898	-0.40023	5.57921e-08	-0.191967	0.0114693
EF0779	glycerophosphoryl diester phosphodiesterase family protein		C	5		K01126	EF0778-EF0780	-0.0422102	0.661893	-0.193308	0.0344378	0.340904	0.0325029	-0.511531	1.46084e-12	0.467238	1.17907e-09
EF1674	hypothetical protein		X	4			EF1674-EF1676	-0.102813	0.427939	-0.194455	0.192241	0.412975	7.39167e-05	-0.0914137	0.603842	0.340106	0.00307998
EF0653	hypothetical protein		X	1			EF0653-EF0654	0.236903	0.359894	-0.194924	0.550664	0.58356	0.00739253	-0.380239	0.137836	0.471937	0.0148811
EF1259	hydrolase, haloacid dehalogenase-like family		R	5			EF1259	-0.318409	5.59113e-05	-0.194995	0.00557692	0.120393	0.0455816	-0.342601	1.27586e-05	0.364217	1.30294e-06
EF3001	protease synthase and sporulation negative regulatory protein pai 1		X	1			EF3001-EF3002	-0.13716	0.21268	-0.196179	0.10331	0.178232	0.0413674	-0.383015	0.00270353	0.332747	0.00111763
EF0964	conserved hypothetical protein		R	5			EF0962-EF0964	-0.116972	0.263626	-0.196674	0.0878976	0.201755	0.00723871	-0.175789	0.129862	0.373994	0.000195024
EF0919	acetyltransferase, GNAT family		X	5		K03827	EF0919-EF0920	-0.286529	0.00263602	-0.197576	0.0863066	-0.570805	9.58593e-19	-0.672569	5.11127e-07	-0.223365	0.0188846
EF1818	coccolysin		E	3	3.4.24.30	K08605	EF1817-EF1818	-0.420998	0.0414929	-0.197729	0.336895	-0.485202	0.0158801	-0.321143	0.00972783	0.0817047	0.364328
EF1700	signal recognition particle protein	ffh	U	4		K03106	EF1700-EF1701	-0.513242	0.0914017	-0.197748	0.244211	-0.511979	0.00169592	0.188601	0.481928	-0.2038	0.433664
EF1809	transcriptional regulator, GntR family		K	1		K03710	EF1808-EF1809	-0.0109563	0.973587	-0.198967	0.299993	-0.123058	0.418126	-0.547256	0.0178445	0.108859	0.477606
EF1378	transcriptional regulator, putative		TK	1			EF1378	-0.168398	0.068634	-0.199034	0.0885507	0.00894754	0.889833	-0.13254	0.185089	0.158833	0.0789292
EF2758	ABC transporter, ATP-binding protein		R	5		K02068	EF2757-EF2764	0.0808456	0.379683	-0.199509	0.0950732	0.527736	9.63071e-14	0.182804	0.0540013	0.395158	3.0088e-05
EF1922	transcriptional regulator, LacI family/carbohydrate kinase, PfkB family protein		K	1	2.7.1.15	K00852	EF1922	0.0854356	0.345896	-0.200239	0.0379477	0.00244193	0.962632	-0.424686	1.60012e-05	-0.340633	0.000138797
EF2641	glycine betaine/L-proline ABC transporter, ATP-binding subunit		E	3		K02000	EF2641-EF2642	0.854826	6.66087e-12	-0.201154	0.116586	0.591412	1.48403e-09	-0.253599	0.040069	-0.213467	0.0865222
EF1305	oxygen-independent coproporphyrinogen III oxidase, putative		H	4			EF1305-EF1308	0.145504	0.0742825	-0.201618	0.0710398	-0.0511562	0.51168	-0.751926	6.09311e-15	-0.305623	0.000431314
EF0937	conserved hypothetical protein		X	5		K16788	EF0937	-0.00451954	1	-0.202952	0.310434	-0.208755	0.126982	-0.145404	0.291853	-0.0706205	0.578909
EF1548	ribosomal protein S1		J	1		K02945	EF1547-EF1549	-0.125262	0.495178	-0.203444	0.291308	0.362011	0.0454798	-0.019851	0.853514	0.457872	1.12979e-07
EF2372	aspartate aminotransferase	aspB	E	1	2.6.1.1		EF2371-EF2373	0.03686	0.731201	-0.203899	0.0193016	0.416442	2.16346e-05	-0.36598	1.58066e-05	0.263067	0.00332476
EF2795	LysM domain lipoprotein		X	5			EF2794-EF2795	0.235125	0.0310436	-0.204966	0.00372104	0.135528	0.112397	-0.39145	2.05134e-05	-0.0475153	0.584867
EF3267	GTP cyclohydrolase I	folE	H	4	3.5.4.16	K01495	EF3264-EF3269	-0.120846	0.168857	-0.206291	0.0154443	0.0939744	0.163143	-0.256488	0.0133365	0.429963	3.18151e-06
EF1525	transcriptional regulator, Fur family		P	2		K03711	EF1525	-11.4426	0	-0.206558	0.00320101	0.559668	4.2647e-11	0	0	0
EF1557	dihydrodipicolinate reductase	dapB	E	1	1.3.1.26	K00215	EF1556-EF1559	-0.0570442	0.5997	-0.206725	0.0273673	-0.278554	0.00120334	-0.53896	1.49159e-09	-0.194328	0.0213027
EF3273	hypothetical protein		X	1			EF3271-EF3273	0.359283	0.000311515	-0.207064	0.0614315	0.454397	1.81992e-08	-0.770432	9.24357e-14	-0.123353	0.172197
EF2454	conserved hypothetical protein		S	5			EF2453-EF2458	-0.0389088	0.639211	-0.208054	0.0190889	0.427831	1.81867e-09	-0.0466721	0.608015	0.280588	0.000335524
EF1901	Mn2+/Fe2+ transporter, NRAMP family		P	2		K03322	EF1901	-0.386222	0.000601777	-0.208459	0.017293	0.592536	1.50223e-09	-0.850982	2.54578e-19	0.91697	6.50507e-24
EF2880	3-oxoacyl-(acyl-carrier-protein) synthase II	fabF-2	IQ	3	2.3.1.41	K09458	EF2875-EF2886	-0.443334	0.0146193	-0.208884	0.281006	-0.133414	0.457272	-0.359116	0.000727383	0.417091	9.76642e-07
EF1974	GTP pyrophosphokinase	relA	TK	2	2.7.6.5	K00951	EF1973-EF1974	0.124513	0.472485	-0.209986	0.203422	-0.219018	0.177384	-0.386992	4.7068e-05	-0.288668	0.000167144
EF0725	glutamyl-tRNA(Gln) amidotransferase, A subunit	gatA	X	1	6.3.5.-	K02433	EF0724-EF0727	-0.0321897	0.865332	-0.210135	0.258232	0.0071987	0.969515	-0.272941	0.00747765	0.0918841	0.248688
EF2059	transport ATP-binding protein CydC, putative		CO	3		K16013	EF2058-EF2061	-0.0655183	0.728527	-0.211873	0.237782	-0.797705	4.0031e-06	-0.0870256	0.429176	-0.742531	2.83377e-16
EF3109	peptide ABC transporter, ATP-binding protein		E	3		K02032	EF3109	-0.45928	1.81556e-06	-0.213054	0.0183587	0.349553	1.39799e-05	-0.716724	8.12547e-20	0.859939	4.03801e-31
EF0780	MutT/nudix family protein		LR	5		K03574	EF0778-EF0780	-0.0709008	0.375534	-0.213474	0.0203185	0.383348	2.63344e-12	-0.280035	0.000638245	0.455198	5.95277e-10
EF0367	conserved hypothetical protein		S	5			EF0366-EF0367	0.0421048	0.681893	-0.214377	0.0736633	-0.310521	0.000142846	-0.112973	0.309646	-0.5173	1.77792e-07
EF0037	gamma-glutamyl phosphate reductase	proA	E	3	1.2.1.41	K00147	EF0037-EF0038	-0.325228	0.00108268	-0.214985	0.0304418	0.393453	3.22294e-06	0.368041	4.10399e-07	0.679975	4.95224e-22
EF0994	UDP-N-acetylglucosamine--N-acetylmuramyl-(pentapeptide) pyrophosphoryl-undecaprenol N-acetylglucosamine transferase	murG	M	4	2.4.1.-	K02563	EF0988-EF1002	0.243851	0.021861	-0.215556	0.0181269	-0.645624	5.78668e-14	-0.537535	1.08465e-09	-0.883366	1.30919e-25
EF2455	hypothetical protein		X	5			EF2453-EF2458	-0.177241	0.0756701	-0.216072	0.0189077	0.358375	2.13895e-05	-0.00922502	0.903614	0.448313	1.61347e-09
EF1228	hypothetical protein		X	5			EF1228-EF1230	-0.330985	0.000288512	-0.217279	0.0419489	0.472486	1.05152e-11	-0.405218	0.00013992	0.371467	6.17492e-05
EF0407	transcriptional regulator, putative		K	3		K03483	EF0406-EF0408	-0.148459	0.121635	-0.218818	0.0148656	0.527142	2.51351e-15	0.137115	0.154793	0.393098	1.01634e-05
EF1510	conserved hypothetical protein		X	5			EF1510	0.241611	0.00874498	-0.219005	0.0365352	0.643271	1.31876e-18	0.450907	1.18745e-06	0.197282	0.0319943
EF2553	hemK protein	hemK	J	1		K02493	EF2552-EF2555	0.0150878	0.889487	-0.219015	0.0323686	-0.186669	0.0270056	-0.42784	9.77821e-07	-0.26652	0.00395241
EF0979	exodeoxyribonuclease VII, large subunit	xseA	L	1	3.1.11.6	K03601	EF0976-EF0984	0.0114146	0.909377	-0.219104	0.0118057	-0.35638	1.0933e-05	-0.637278	5.17031e-17	-0.252109	0.00106066
EF2878	(3R)-hydroxymyristoyl-(acyl-carrier-protein) dehydratase	fabZ-2	I	3	4.2.1.-	K02372	EF2875-EF2886	-0.420268	0.01617	-0.219432	0.197112	-0.16623	0.320875	-0.266859	0.00310709	0.299133	0.000430416
EF2064	DNA topoisomerase III	topB-1	L	1	5.99.1.2	K03169	EF2064	0.065753	0.586252	-0.2205	0.0203959	-0.293016	0.000974827	-0.667828	1.48557e-11	-0.342513	0.000732359
EF1568	prephenate dehydratase		E	3		K04518	EF1561-EF1569	-0.592161	1.1499e-13	-0.222445	0.00281858	-0.18919	0.00522908	0.761444	9.33475e-17	0.361188	2.62505e-06
EF1162	helicase, putative		KL	1			EF1162-EF1164	0.43734	5.92315e-08	-0.223141	0.00573406	0.108181	0.104832	0.104383	0.230691	-0.400288	5.99544e-07
EF1025	CBS domain protein		R	5			EF1025-EF1026	0.204891	0.105146	-0.224043	0.140953	-0.293799	0.0268239	-0.519762	8.61361e-05	-0.587514	8.09202e-07
EF2404	hypothetical protein		X	5			EF2404	0.020192	0.835262	-0.226036	0.0105004	-0.20823	0.0126849	-0.353305	2.05677e-06	-0.154755	0.0333105
EF2871	nicotinate-nucleotide adenylyltransferase	nadD	H	5		K00969	EF2870-EF2874	0.154881	0.136451	-0.230049	0.0187996	-0.709879	8.03071e-15	-0.356124	9.43775e-06	-0.809196	2.84938e-30
EF3067	hydrolase, haloacid dehalogenase-like family		R	1			EF3067-EF3068	-0.537788	7.8661e-07	-0.230408	0.00482957	-0.243092	0.000777901	0.176964	0.0849079	0.119582	0.212712
EF3209	ABC transporter, ATP-binding protein		V	4		K01990	EF3208-EF3209	-0.0398978	0.699886	-0.230688	0.0129236	0.34597	4.25405e-06	-0.30234	0.00563288	0.313069	0.00159016
EF3281	conserved domain protein		S	5			EF3281	-0.156823	0.164545	-0.23086	0.0610942	0.223178	0.0103551	0.259365	0.0349323	0.12842	0.234853
EF1115	phenylalanyl-tRNA synthetase, alpha subunit	pheS	J	1	6.1.1.20	K01889	EF1115-EF1116	-0.0751165	0.438944	-0.231025	0.0101383	-0.614544	1.66243e-13	-0.144547	0.0465525	-0.402415	1.66382e-08
EF1524	conserved hypothetical protein		S	5		K00243	EF1524	-0.0953495	0.333632	-0.233026	0.0122752	0.281705	0.000835128	0.19181	0.0134637	0.378179	1.52161e-08
EF0120	conserved hypothetical protein		S	5			EF0120-EF0123	-0.0796504	0.443481	-0.233424	0.0734112	0.388853	1.63775e-06	0.180402	0.081696	0.425061	7.77237e-06
EF1821	agrBfs protein	agrBfs	OTK	4		K07813	EF1820-EF1821	-0.278487	0.117313	-0.233638	0.181743	0.74302	5.77899e-05	0.0609762	0.524966	0.789684	2.67359e-24
EF1002	cell division protein DivIVA	divIVA	D	4		K04074	EF0988-EF1002	-0.0266682	0.882818	-0.234284	0.180788	0.147833	0.405529	-0.0458625	0.637443	0.106908	0.160076
EF0059	UDP-N-acetylglucosamine pyrophosphorylase	glmU	M	4	2.7.7.23	K04042	EF0059	-0.384047	0.000342152	-0.234287	0.01319	-0.351733	0.000105904	-0.100398	0.159998	-0.0724703	0.333613
EF3168	conserved hypothetical protein		X	1			EF3166-EF3172	-0.026267	0.770712	-0.234297	0.0244601	0.0184401	0.818428	-0.591529	2.53417e-10	0.0348353	0.692879
EF2704	A/G-specific adenine glycosylase	mutY	L	1	3.2.2.-	K03575	EF2704-EF2705	0.164002	0.0247887	-0.234565	0.00316393	0.0283604	0.657964	0.0319567	0.684368	-0.069689	0.348551
EF1370	drug resistance transporter, EmrB/QacA family protein		X	5			EF1370	-0.129172	0.166683	-0.234825	0.00280466	0.411505	4.69773e-12	0.358073	0.000166443	0.397548	8.86115e-06
EF3060	secreted lipase, putative		S	5		K21471	EF3060	0.0538214	0.644589	-0.235371	0.0456345	0.0570385	0.589453	0.364826	4.13101e-06	-0.373825	2.39243e-05
EF0039	deoxyuridine 5`-triphosphate nucleotidohydrolase, putative		X	1		K01520	EF0039-EF0049	-0.0357944	0.640838	-0.235888	0.00157944	-0.263915	5.452e-05	-0.559946	1.34383e-11	-0.402685	3.87398e-07
EF3280	peptidase, U32 family, putative		X	5			EF3278-EF3280	0.155712	0.0506067	-0.235929	0.00437285	-0.0989853	0.128786	-0.311567	0.000507447	-0.290535	0.000385656
EF1977	conserved hypothetical protein		X	5			EF1975-EF1978	-0.0209516	0.824372	-0.236714	0.00806894	-0.598363	1.88912e-13	-0.684777	1.27013e-15	-0.527226	9.05248e-09
EF2149	hypothetical protein		X	5			EF2149	-0.486647	4.52381e-08	-0.239387	0.00316272	-0.377398	1.04749e-07	0.249341	0.00665569	0.127879	0.126138
EF3120	serine/threonine protein kinase		S	4	2.7.1.-	K12132	EF3117-EF3123	0.0581148	0.753382	-0.239652	0.180546	-0.709678	3.76378e-05	-0.10366	0.33572	-0.706975	6.30322e-17
EF1327	BadF/BadG/BcrA/BcrD ATPase family protein		I	3			EF1327	-0.216743	0.233132	-0.24022	0.181789	0.24564	0.177243	-0.252051	0.0137514	0.584713	7.37405e-13
EF1907	maoC family protein		I	3			EF1906-EF1907	-0.0482951	0.652043	-0.240549	0.0082602	0.267964	0.00144034	-0.211901	0.00949678	0.391733	8.54587e-07
EF0001	chromosomal replication initiator protein DnaA	dnaA	L	1		K02313	EF0001-EF0002	0.2996	0.00283304	-0.241108	0.0136836	0.115513	0.178481	-0.501407	7.75543e-12	-0.241436	0.000463379
EF0892	amino acid ABC transporter, ATP-binding protein		E	3		K02028	EF0891-EF0893	0.57577	1.88104e-09	-0.242041	0.0282413	0.742166	1.43376e-18	-0.668469	1.45117e-10	0.366939	8.09655e-05
EF0422	transcriptional regulator, IclR family		K	1			EF0422	0.30777	0.00935998	-0.245179	0.0891993	0.481467	9.44619e-07	-0.383797	0.0029582	-0.0150917	0.8895
EF3173	hypothetical protein		X	5			EF3173	0.0249044	0.894859	-0.245958	0.136151	-0.892549	2.24285e-08	-0.621206	4.85763e-07	-0.848218	5.07185e-14
EF1966	YitT family protein		S	5			EF1966	-0.147708	0.0855805	-0.246439	0.00974831	-0.299867	1.78302e-06	-0.239103	0.00803676	-0.261866	0.00251882
EF0996	cell division protein FtsA	ftsA	D	4		K03590	EF0988-EF1002	0.0310304	0.867743	-0.247763	0.171729	-0.300033	0.0983786	-0.310863	0.00454125	-0.200495	0.0225647
EF1640	iron compound ABC transporter, permease protein		P	2		K02015	EF1639-EF1641	0.00566683	0.954995	-0.250644	0.000408384	-0.52956	4.94988e-19	-0.332599	0.000239976	-0.571224	2.5786e-11
EF1194	sensory box histidine kinase VicK	vicK	T	2	2.7.3.-	K07652	EF1193-EF1197	0.278958	0.00567689	-0.251119	0.00683457	0.230723	0.00687559	-0.406537	5.25035e-08	-0.0934749	0.228603
EF0888	conserved hypothetical protein		X	5			EF0884-EF0890	0.0566336	0.450942	-0.251945	0.0037397	-0.0767956	0.181748	-0.13233	0.0858802	-0.220567	0.0066235
EF0376	hypothetical protein		X	5			EF0376	-0.227531	0.0976534	-0.251967	0.0730111	0.407529	5.84873e-05	-0.141107	0.332709	0.636726	8.69456e-06
EF1971	histidyl-tRNA synthetase	hisS	J	1	6.1.1.21	K01892	EF1970-EF1972	0.129042	0.445577	-0.252954	0.00610101	-0.561896	2.0983e-11	-0.487625	5.22828e-08	-0.550591	4.20569e-12
EF2427	hypothetical protein		X	1			EF2427-EF2428	0.0191473	0.867034	-0.254294	0.00761167	0.465106	4.27089e-12	-0.10786	0.368631	0.601598	3.656e-08
EF1195	hypothetical protein		X	2			EF1193-EF1197	0.279126	0.00821662	-0.25455	0.00567859	0.279183	0.00108866	-0.449017	9.8507e-08	0.00105188	0.990275
EF0017	ABC transporter, ATP-binding protein		R	5			EF0017	-0.0729769	0.666304	-0.255859	0.121939	-0.0448425	0.78396	-0.181442	0.0500408	-0.000463848	0.995718
EF2376	hypothetical protein		X	5			EF2376	-0.171094	0.28629	-0.256245	0.0887151	-0.497447	5.0129e-05	-0.366642	0.0392637	-0.141475	0.39558
EF1139	glutamine amidotransferase, class I		R	5		K07010	EF1139	-0.0330586	0.78941	-0.257486	0.0595408	-0.332434	0.0023827	-0.22619	0.0637825	-0.302125	0.00807382
EF1519	cation-transporting ATPase, E1-E2 family		P	2		K12952	EF1519	-0.0938049	0.596938	-0.257539	0.132602	0.160925	0.355157	0.105249	0.276528	0.0558305	0.486895
EF1318	hypothetical protein		X	5			EF1318-EF1319	0.14794	0.158648	-0.25762	0.0399939	0.629461	5.30965e-15	-0.224948	0.0316456	0.44999	4.08726e-06
EF1376	conserved hypothetical protein		V	4			EF1376	0.214134	0.00840194	-0.258573	0.000884431	-0.0195215	0.7844	-0.685067	4.25713e-13	-0.275101	0.000548294
EF2373	conserved hypothetical protein		X	1			EF2371-EF2373	-0.0977656	0.336766	-0.259693	0.00769568	0.648639	6.28371e-19	-0.609425	1.15332e-08	0.553888	2.40286e-08
EF1797	conserved hypothetical protein		X	5			EF1797	0.00425305	0.95997	-0.259924	0.0460337	0.324235	0.00100028	-0.206712	0.112074	0.0224489	0.864803
EF2181	glycosyl transferase, group 2 family protein		M	4		K20444	EF2178-EF2183	0.108002	0.580421	-0.261188	0.159924	-0.348509	0.0608751	-0.437886	6.29643e-05	-0.450393	5.7734e-07
EF1163	L-asparaginase, putative		X	1		K01424	EF1162-EF1164	0.0928143	0.253218	-0.261916	0.000997056	0.182266	0.00274529	0.58896	4.95671e-13	-0.0488393	0.550679
EF0692	phosphosugar-binding transcriptional regulator, RpiR family, putative		K	1			EF0692	0.187291	0.231526	-0.262698	0.147447	0.0572518	0.704326	-0.471138	0.0127767	-0.063844	0.685962
EF3062	rod shape-determining protein MreC	mreC	M	4		K03570	EF3061-EF3062	-0.0536046	0.575738	-0.26333	0.00319195	0.332198	4.35904e-07	0.549409	1.62314e-09	0.24222	0.00581853
EF2379	prolyl-tRNA synthetase	proS	J	1	6.1.1.15	K01881	EF2379-EF2380	-0.212844	0.208513	-0.264169	0.106328	-0.381707	0.0172445	0.0755067	0.478032	-0.118985	0.120425
EF2148	hypothetical protein		X	5			EF2148	-0.145724	0.0807023	-0.264329	0.00457676	-0.0840494	0.181903	0.0782213	0.429749	-0.0141027	0.869062
EF3148	CDP-diacylglycerol--glycerol-3-phosphate 3-phosphatidyltransferase	pgsA	I	3	2.7.8.5	K00995	EF3148	-0.21703	0.0689699	-0.264671	0.00627191	0.422719	5.02553e-09	-0.0287648	0.810533	0.230738	0.0498914
EF0903	mevalonate diphosphate decarboxylase	mvaD	I	3	4.1.1.33	K01597	EF0901-EF0904	-0.0696101	0.403473	-0.265391	0.0019818	-0.314151	3.87539e-06	-0.218872	0.0139467	-0.510868	1.19109e-10
EF1198	conserved hypothetical protein		R	5		K07089	EF1198-EF1199	-0.0392751	0.76896	-0.266212	0.0943446	0.728335	1.1725e-12	-0.277901	0.0819565	0.55006	2.42482e-05
EF1731	3-dehydroquinate dehydratase, type I	aroD	X	5	4.2.1.10	K03785	EF1730-EF1731	-0.0323292	0.705982	-0.266792	0.00230864	-0.311428	1.66534e-06	-0.508209	1.59437e-07	-0.318915	0.000399134
EF0377	ankyrin repeat family protein		R	5		K06867	EF0377	0.120105	0.337914	-0.267515	0.0329311	0.508464	8.98069e-08	-0.625821	4.81069e-07	0.306007	0.00586124
EF0370	conserved hypothetical protein		D	3		K06286	EF0370-EF0371	0.0324802	0.855337	-0.268051	0.12026	-0.257002	0.136956	-0.133491	0.166884	-0.324954	2.55485e-05
EF3268	2-amino-4-hydroxy-6-hydroxymethyldihydropteridine pyrophosphokinase	folK	H	4	2.7.6.3	K00950	EF3264-EF3269	-0.0800204	0.360979	-0.268727	0.00456715	0.000755359	0.995902	-0.440227	1.09055e-05	0.226301	0.019085
EF1793	branched-chain amino acid aminotransferase	ilvE	EH	3	2.6.1.42	K00826	EF1793	-0.429606	0.000550208	-0.270031	0.00762748	0.100323	0.290266	0.376127	0.000134994	0.395366	2.23731e-05
EF1133	2,3,4,5-tetrahydropyridine-2,6-dicarboxylate N-succinyltransferase	dapD	E	3	2.3.1.117	K05822	EF1133-EF1134	0.0356051	0.659284	-0.271023	0.000418275	0.206622	0.00177502	-0.191075	0.0243418	0.112855	0.130362
EF0921	sulfate transporter family protein		P	2		K03321	EF0921	0.132142	0.292928	-0.272975	0.0917269	0.585011	3.73542e-07	-0.188953	0.155008	0.087663	0.415932
EF1512	conserved hypothetical protein		E	3			EF1511-EF1513	0.135021	0.504272	-0.273816	0.28722	0.822255	9.67698e-06	-0.288588	0.202736	0.380881	0.0239478
EF2238	sugar-binding transcriptional regulator, LacI family		K	1		K02529	EF2238	-0.0647689	0.444018	-0.274083	0.00142066	-0.194819	0.00387029	-0.966066	1.25905e-21	-0.157142	0.0779655
EF0910	peptide ABC transporter, permease protein		EP	3		K15582	EF0909-EF0912	-0.0166062	0.927708	-0.275383	0.120769	0.188048	0.296056	-0.313015	0.00138566	0.250857	0.00102762
EF1531	transcriptional regulator, TetR family		K	5			EF1531-EF1533	0.178251	0.693554	-0.276706	0.498242	0.715725	0.0140627	0.0222869	1	-0.0888888	0.849038
EF1575	ABC transporter, ATP-binding protein		R	5		K15738	EF1575-EF1577	0.12598	0.270151	-0.278159	0.00437617	-0.434541	1.16284e-06	-0.81513	1.74608e-16	-0.604236	1.31855e-10
EF1969	phosphomethylpyrimidine kinase, putative		H	5		K00868	EF1967-EF1969	-0.259502	0.000677563	-0.278235	0.000146054	-0.0970419	0.142413	0.308935	0.000176582	-0.206951	0.0134285
EF2861	aminoglycoside 6-adenylyltransferase	aadK	X	5	2.7.7.-	K05593	EF2861	0.141554	0.289228	-0.278736	0.0657139	0.187959	0.0821105	-0.327978	0.0228299	0.204809	0.103407
EF0922	membrane protein, putative		X	5			EF0922	-0.141693	0.123313	-0.280369	0.00364781	0.696971	7.29735e-22	0.0444572	0.623924	0.702232	2.24749e-19
EF1983	acetate kinase	ackA	C	3	2.7.2.1	K00925	EF1983	-0.22973	0.0302095	-0.28155	0.00234412	-0.661167	1.82219e-13	-0.277222	0.000249315	-0.742032	3.49876e-18
EF3025	conserved hypothetical protein TIGR00246		S	5		K00783	EF3025	-0.0301738	0.715894	-0.281979	0.000563884	-0.508208	7.57424e-14	-0.727783	1.31257e-14	-0.634654	5.98164e-12
EF3277	cytosine permease, putative		F	5		K10974	EF3275-EF3277	-0.517875	3.88348e-07	-0.282216	0.00960222	-0.289351	0.000882523	0.305664	0.00984749	0.29308	0.00638684
EF3316	malic enzyme family protein		C	4		K00027	EF3315-EF3316	-0.0566287	0.589393	-0.283726	0.0169482	0.11609	0.211382	-0.0176964	0.889303	0.185141	0.0627866
EF2476	penicillin-binding protein 4		M	4		K18149	EF2476	-0.0660591	0.495993	-0.284035	0.00170565	0.212325	0.00951739	-0.404642	6.23072e-08	0.315669	0.000116681
EF0123	conserved hypothetical protein		X	5			EF0120-EF0123	-0.152412	0.329739	-0.284096	0.141956	-0.816704	1.38529e-07	-0.892438	6.83084e-06	-0.286489	0.110603
EF2857	penicillin-binding protein 2B		M	4		K00687	EF2857	0.0597268	0.569492	-0.286331	0.00164665	-0.0506374	0.543859	-0.373215	1.89994e-06	-0.0843875	0.298125
EF0249	transcriptional regulator, Sir2 family		K	1		K12410	EF0249-EF0251	0.104234	0.178251	-0.2876	0.000220543	0.25645	5.38778e-05	-0.630075	3.53508e-13	0.0478605	0.549099
EF2962	sugar-binding transcriptional regulator, LacI family		K	3		K02529	EF2959-EF2962	0.11596	0.240607	-0.288295	0.00534759	-0.529785	9.6508e-10	-0.319032	0.00290771	-0.780118	1.00643e-09
EF3144	phosphosugar-binding transcriptional regulator, RpiR family		K	1			EF3144	0.207883	0.124535	-0.288922	0.142195	0.928568	1.82173e-14	0.240492	0.144931	0.802811	2.22216e-10
EF1239	conserved hypothetical protein		G	3		K21298	EF1232-EF1240	-0.25345	0.00781869	-0.289959	0.0054091	0.651042	1.89299e-20	-0.296473	0.0042843	0.911107	1.42904e-24
EF0420	drug resistance transporter, EmrB/QacA family protein		X	5			EF0419-EF0420	0.330165	8.83381e-05	-0.291009	0.000388989	0.117171	0.0494096	-0.7019	1.71592e-13	-0.290141	0.000615484
EF1688	single-stranded-DNA-specific exonuclease RecJ	recJ	L	1	3.1.-.-	K07462	EF1687-EF1688	-0.0343326	0.720562	-0.293009	0.00102502	0.564613	3.03761e-12	-0.383037	1.97538e-07	0.407987	2.34342e-09
EF1211	NADH peroxidase	npr	R	5	1.11.1.1	K05910	EF1211	0.813039	2.76576e-05	-0.293234	0.112846	-0.825542	7.34306e-06	-0.0624118	0.570126	-0.636412	1.78907e-14
EF2198	glycosyl transferase, group 4 family protein		M	4		K02851	EF2195-EF2198	-0.0726542	0.362351	-0.293853	5.50083e-05	0.507022	1.69544e-09	0.298306	8.97745e-05	0.209711	0.00390817
EF0983	transcriptional regulator, ArgR family		K	1		K03402	EF0976-EF0984	0.0196525	0.839027	-0.293992	0.00411375	-0.0556959	0.488902	-0.222491	0.0352976	-0.10681	0.239287
EF1820	histidine kinase, putative		X	4		K07706	EF1820-EF1821	-0.506484	0.00933612	-0.2953	0.145111	0.922794	6.99251e-07	0.0763657	0.638096	0.823288	2.22687e-18
EF2382	glucose 1-dehydrogenase	gdh	IQR	3	1.1.1.47	K00034	EF2382	-0.470819	0.111348	-0.296102	0.304354	-0.221617	0.393929	0.24319	0.501481	-0.0912337	0.790324
EF0261	conserved hypothetical protein		X	1		K13052	EF0261-EF0268	0.247814	0.0183281	-0.296326	6.52662e-05	0.620445	2.12945e-12	-0.420911	1.42541e-06	0.244997	0.00262171
EF0301	transcriptional regulator, GntR family		K	1			EF0300-EF0301	0.107411	0.561011	-0.296437	0.167058	-0.0749829	0.740083	-0.344195	0.0895164	0.131127	0.407604
EF1217	lipoprotein, putative		X	5			EF1217	-0.97446	5.07881e-11	-0.29728	0.0514772	-0.181777	0.180632	0.151476	0.488662	0.708093	8.90438e-06
EF0720	voltage-gated chloride channel family protein		P	2			EF0720	-0.118613	0.134866	-0.297354	3.05165e-05	-0.115376	0.0429444	0.0845671	0.287942	-0.217778	0.00551911
EF2722	L-serine dehydratase, iron-sulfur-dependent, alpha subunit	sdhA-2	E	3	4.2.1.13	K01752	EF2721-EF2722	0.0737462	0.557147	-0.297374	0.0449027	-0.675808	8.60824e-09	-0.549288	3.38402e-06	-0.992021	3.4708e-17
EF0366	conserved hypothetical protein		X	5			EF0366-EF0367	-0.00902469	0.925601	-0.297438	0.000230965	-0.263499	0.000150965	-0.204101	0.0208912	-0.355545	2.20757e-05
EF1653	ribonuclease HII	rnhB	L	1	3.1.26.4	K03470	EF1652-EF1654	-0.00746284	0.924452	-0.297771	5.79092e-05	-0.93767	4.75525e-41	-0.15156	0.0613143	-0.903465	3.49747e-31
EF3146	hypothetical protein		X	5			EF3146	0.24791	0.178602	-0.298766	0.179774	-0.0395896	0.886511	0.00549709	1	-0.345072	0.0479812
EF2203	transcriptional regulator, TetR family		K	1			EF2203	0.0989773	0.192485	-0.300407	0.000152377	-0.0271767	0.700703	0.626838	1.34112e-14	-0.0549332	0.472076
EF1380	conserved hypothetical protein		R	5		K06967	EF1380-EF1382	0.0776761	0.423842	-0.301276	0.00104762	-0.218561	0.00938518	-0.764314	1.11387e-24	-0.308106	1.4773e-05
EF1701	conserved hypothetical protein		S	4		K09787	EF1700-EF1701	-0.146228	0.453377	-0.302979	0.0342491	-0.231377	0.0532298	-0.280349	0.196	-0.23063	0.204361
EF0960	endonuclease/exonuclease/phosphatase family protein		R	5		K06896	EF0959-EF0960	-0.0523431	0.696632	-0.303016	0.0155616	0.50158	5.03311e-08	0.045342	0.769231	0.434122	0.000138205
EF0277	methylated-DNA--protein-cysteine S-methyltransferase	ogt	L	5	2.1.1.63	K13531	EF0277-EF0279	-0.0385033	0.697273	-0.303658	0.00550564	-0.872992	6.5193e-22	-0.792921	2.87257e-13	-0.811449	6.08268e-17
EF1389	NAD-dependent formate dehydrogenase, beta subunit, putative		C	2		K00335	EF1386-EF1399	-0.258188	0.429959	-0.305005	0.389256	-0.119637	0.744477	0.553661	0.0621114	-0.132143	0.688587
EF1902	glyoxylase family protein		E	3			EF1902	-0.125662	0.34368	-0.306271	0.0214888	0.739268	5.66993e-19	-0.174106	0.233624	0.816371	2.79096e-12
EF2180	glycosyl transferase, group 2 family protein		M	4		K20444	EF2178-EF2183	0.0534956	0.77182	-0.306643	0.082294	-0.371019	0.0342288	-0.104737	0.304373	-0.494081	2.07317e-09
EF0783	acyltransferase, putative		I	3			EF0783	0.0934884	0.209292	-0.306659	2.41828e-06	0.481454	8.21074e-19	-0.0532138	0.485625	0.228151	0.00193221
EF2156	conserved hypothetical protein		S	5			EF2156-EF2157	-0.000414075	0.998296	-0.306772	0.0614435	0.0339949	0.836803	-0.697763	6.74669e-15	-0.0757582	0.316271
EF3129	D-alanyl-D-alanine carboxypeptidase		M	4		K01286	EF3129	-0.0680364	0.486062	-0.306943	0.00220479	0.26104	0.00172265	-0.0482607	0.493695	0.26238	0.000171703
EF0655	nitroreductase family protein, putative		R	5		K07078	EF0655	0.245907	0.0263223	-0.30776	0.0126685	0.0732475	0.502758	-0.711359	5.54833e-09	-0.0577409	0.589347
EF2183	ABC transporter, permease protein		GM	4		K09692	EF2178-EF2183	0.165626	0.0505996	-0.30811	0.000327758	0.534879	1.64694e-18	-0.307478	0.00131702	0.161257	0.0545099
EF2653	transcriptional regulator, Cro/CI family		K	3			EF2649-EF2653	-0.208781	0.0964984	-0.308491	0.0390037	-0.466039	0.000191068	-0.608976	0.00024973	-0.135298	0.335369
EF0943	conserved hypothetical protein		X	5			EF0943	-0.18941	0.0318645	-0.311844	0.000565248	-0.202776	0.0059384	-0.848566	1.42558e-13	-0.105698	0.269595
EF0457	PTS system, IIB component		X	5	2.7.1.69	K02794	EF0455-EF0461	0.179213	0.355058	-0.311988	0.150752	-0.0334652	0.852539	-0.269376	0.231714	-0.0608546	0.724227
EF2191	dTDP-4-dehydrorhamnose reductase		M	4	1.1.1.133	K00067	EF2191-EF2194	-0.184042	0.0622964	-0.312161	0.000551093	-0.477212	1.16566e-08	-0.0208817	0.774389	-0.332093	4.0761e-06
EF0715	trigger factor	tig	O	4	5.2.1.8	K03545	EF0715	0.0212901	0.90637	-0.313194	0.102599	-0.394697	0.0245212	-0.247763	0.0180617	-0.431598	8.75994e-08
EF2151	glucosamine--fructose-6-phosphate aminotransferase, isomerizing	glmS	M	4	2.6.1.16	K00820	EF2151	-1.59218	9.98172e-18	-0.313885	0.0856106	-0.586926	0.00138349	0.398544	0.00017058	0.8853	3.17241e-24
EF0051	4-diphosphocytidyl-2C-methyl-D-erythritol kinase	ispE	I	3	2.7.1.-	K00919	EF0050-EF0051	0.174783	0.0655459	-0.313989	0.000925847	0.37317	7.96275e-07	0.684258	7.0112e-12	-0.0280063	0.770674
EF2444	acyl-CoA thioester hydrolase		I	3			EF2444	-0.175944	0.0764647	-0.314543	0.00127218	-0.46095	1.07832e-09	-0.374433	0.000670612	-0.439955	6.45772e-05
EF0236	peptidase, M20/M25/M40 family		R	5			EF0236	-0.293801	0.000684167	-0.315378	0.00105425	-0.983684	6.93265e-55	-0.275283	0.00294671	-0.992043	1.67026e-25
EF0699	conserved hypothetical protein		R	5			EF0699	0.365475	2.11175e-05	-0.317828	0.000496318	-0.264486	0.000356885	-0.702194	2.85573e-15	-0.622105	1.56372e-12
EF0810	conserved hypothetical protein		S	5			EF0810-EF0811	-0.0800011	0.614929	-0.318468	0.0636644	0.885393	1.39504e-13	-0.418742	0.0214991	0.679166	2.90911e-07
EF1170	transcription termination factor Rho	rho	K	4		K03628	EF1169-EF1170	-0.0156457	0.87605	-0.320005	0.00112041	0.265924	0.00174534	-0.0547584	0.462742	0.189338	0.00632106
EF0704	lipoprotein, putative		X	5			EF0704	-0.119431	0.164259	-0.322104	4.08139e-06	0.201226	0.00175884	-0.449118	9.24028e-07	0.318887	0.000388355
EF1547	cytidylate kinase	cmk	F	1	2.7.4.14	K00945	EF1547-EF1549	0.262146	0.00620171	-0.32382	0.000458886	0.777259	7.17609e-22	-0.415749	1.21806e-08	0.427779	2.05315e-09
EF3078	conserved hypothetical protein		X	5			EF3078	-0.855933	2.52499e-18	-0.326184	0.000301519	0.331399	1.48174e-05	0.180845	0.0720939	0.849901	3.35122e-23
EF2919	ABC transporter, ATP-binding/permease protein		V	4		K18888	EF2919-EF2920	-0.430296	0.000154658	-0.328188	0.00162776	0.548067	0.00103145	-0.0152859	0.840882	0.982101	3.24155e-35
EF2509	AzlC family protein		E	3			EF2509	1.24126	1.65182e-29	-0.328529	0.0191427	0.853083	6.03307e-17	-0.139058	0.165443	-0.427346	9.20235e-06
EF1623	microcompartment protein		QC	3		K04027	EF1623-EF1627	0.0255015	0.95838	-0.328754	0.190945	-0.625978	0.00565852	-0.481176	0.0863682	-0.745341	0.00165219
EF1045	6-phosphofructokinase	pfk	G	3	2.7.1.11	K00850	EF1044-EF1046	-0.122688	0.586711	-0.329076	0.0883079	-0.227718	0.237034	-0.0625466	0.688111	-0.0822571	0.542792
EF0687	HIT family protein		FGR	3		K02503	EF0686-EF0687	0.131602	0.199643	-0.329354	0.000215963	-0.139278	0.0254161	-0.944641	2.31647e-18	-0.254603	0.0116411
EF3240	BirA bifunctional protein	birA	K	1	6.3.4.15	K03524	EF3240	-0.171531	0.0330551	-0.329469	1.12153e-05	0.450006	2.93352e-12	0.00472396	0.956284	0.57939	8.21437e-14
EF2219	sensor histidine kinase		T	2		K07718	EF2218-EF2220	0.011062	0.917992	-0.330921	0.00120125	0.778483	4.33356e-23	-0.103985	0.402896	0.487629	9.66574e-08
EF1899	tRNA (guanine-N1)-methyltransferase	trmD	X	5	2.1.1.31	K00554	EF1898-EF1900	-0.250676	0.0123301	-0.332103	0.000227517	-0.203397	0.0162538	-0.275909	0.000770334	0.0596251	0.412475
EF2734	oxidoreductase, Gfo/Idh/MocA family		R	4		K03810	EF2733-EF2734	-0.0325826	0.654241	-0.332107	5.48649e-06	-0.677522	1.3955e-29	-0.894419	1.72274e-24	-0.739671	7.61673e-21
EF1277	transcriptional regulator, Cro/CI family		X	5			EF1277	0.905642	5.60251e-18	-0.332618	0.00386334	0.223466	0.0189157	0.0121437	0.911568	-0.430891	7.0881e-06
EF0464	diaminopimelate epimerase	dapF	E	3	5.1.1.7	K01778	EF0464	-0.101129	0.27576	-0.33559	0.000875893	-0.704826	3.89156e-16	-0.278694	0.00738337	-0.549204	3.36273e-08
EF0368	aspartate kinase		E	3	2.7.2.4	K00928	EF0368	-0.32359	4.81361e-05	-0.336679	2.28881e-05	0.709993	7.34517e-16	-0.26765	0.00109359	0.906937	4.94952e-38
EF2935	xanthine/uracil permeases family protein		R	5		K06901	EF2935	0.592549	2.86012e-07	-0.338991	3.69077e-06	-0.0356024	0.516022	-0.355854	0.000346868	-0.780188	1.12217e-16
EF2591	glyoxalase family protein		R	5		K07104	EF2591	0.0621684	0.721002	-0.342175	0.0406034	-0.480376	0.00274914	-0.747715	1.36621e-14	-0.742031	1.45978e-20
EF2695	hypothetical protein		X	5			EF2694-EF2696	-0.104136	0.187375	-0.34239	1.06503e-05	-0.150257	0.0139014	-0.876956	8.79821e-24	-0.190959	0.0141838
EF2462	conserved hypothetical protein		X	3			EF2461-EF2462	-0.0735098	0.412231	-0.343285	3.27096e-05	-0.663683	1.1069e-16	-0.718721	9.7375e-11	-0.665178	6.52784e-12
EF0691	methyltransferase, putative		R	4		K03439	EF0690-EF0691	-0.188798	0.0467509	-0.343342	5.05827e-05	0.219343	0.000243613	-0.14825	0.149057	0.122744	0.184505
EF2740	O-methyltransferase family protein		R	5			EF2740	-0.129163	0.131647	-0.34348	3.94546e-06	-0.265758	0.000215722	-0.223732	0.0164619	-0.334555	0.000212857
EF0930	methionyl-tRNA synthetase	metG	R	5	6.1.1.10	K01874	EF0930	-0.180031	0.300976	-0.344563	0.0404042	-0.825164	3.7397e-07	-0.301845	0.00112944	-0.654257	4.74221e-18
EF2073	ribose-phosphate pyrophosphokinase	prsA-1	FE	3	2.7.6.1	K00948	EF2071-EF2073	0.176091	0.0791595	-0.34603	0.000146363	0.304425	0.000315221	-0.0329565	0.689599	-0.162375	0.0207083
EF2055	oxidoreductase, pyridine nucleotide-disulfide family		C	3		K03885	EF2055-EF2056	0.134997	0.453908	-0.347162	0.0429325	-0.266898	0.125699	-0.345768	0.000344906	-0.503833	7.28553e-11
EF1641	iron compound ABC transporter, iron compound-binding protein		P	2		K02016	EF1639-EF1641	0.0681609	0.499408	-0.34824	1.51141e-05	-0.722159	4.38799e-30	-0.614157	3.50602e-14	-0.851868	7.17124e-28
EF1750	endo/excinuclease amino terminal domain protein		L	1		K03703	EF1750	0.332385	0.0251655	-0.349924	0.0524516	-0.202538	0.163361	-0.540994	0.0149388	-0.57094	6.8241e-05
EF2352	GTP-binding protein LepA	lepA	M	5		K03596	EF2350-EF2352	-0.144641	0.19372	-0.350133	5.38342e-05	0.480771	0.00281521	-0.0930777	0.194565	0.540403	4.0231e-13
EF2860	ErfK/YbiS/YcfS/YnhG family protein, putative		X	5			EF2860	-0.113449	0.277589	-0.35098	0.000362828	0.0286229	0.745904	-0.256163	0.00164666	-0.00351983	0.965194
EF0266	chaperonin, 33 kDa		X	1		K04083	EF0261-EF0268	0.119125	0.113429	-0.352004	3.30891e-06	-0.491767	8.37641e-14	-0.781067	4.46867e-21	-0.758511	4.01897e-23
EF0798	hypothetical protein		S	5			EF0797-EF0798	0.110059	0.242413	-0.352349	0.000464728	-0.423111	4.61924e-08	-0.668979	3.27088e-09	-0.50093	2.51633e-07
EF2658	FemAB family protein		V	4		K05363	EF2658	0.00988162	0.92094	-0.352966	8.9596e-05	-0.383811	2.94949e-06	-0.374067	5.80392e-07	-0.63201	1.39831e-14
EF2218	DNA-binding response regulator, AraC family		T	2		K07720	EF2218-EF2220	-0.0572808	0.496607	-0.353713	0.000134169	0.639831	1.17176e-19	-0.346495	0.000260383	0.449631	1.47334e-07
EF2639	ABC transporter, ATP-binding protein		R	2		K06158	EF2639-EF2640	0.00011194	0.99939	-0.355454	0.000146717	0.351421	2.76966e-05	-0.59963	1.2103e-12	0.310553	0.00028645
EF1777	phosphoribosylamine--glycine ligase	purD	F	3	6.3.4.13	K01945	EF1777-EF1786	-0.051082	0.642608	-0.355881	0.000954185	0.534849	1.69829e-10	0.501619	4.77482e-06	0.596021	3.2503e-10
EF2918	bacterial transferase, putative		R	4			EF2917-EF2918	-0.110453	0.200693	-0.356058	3.11078e-05	-0.114262	0.0689865	-0.477495	3.53876e-07	0.115815	0.180902
EF1169	UDP-N-acetylglucosamine 1-carboxyvinyltransferase 2	murAB	M	4	2.5.1.7	K00790	EF1169-EF1170	0.143806	0.073553	-0.356981	8.50109e-06	0.236579	0.000409614	-0.454249	1.70536e-06	-0.165346	0.0354338
EF2679	tryptophanyl-tRNA synthetase	trpS	J	1	6.1.1.2	K01867	EF2679	-0.0130103	0.855751	-0.358805	1.05017e-07	0.145499	0.0114312	-0.20983	0.0202323	0.195727	0.00634989
EF2872	conserved hypothetical protein TIGR00253		X	5		K07574	EF2870-EF2874	0.179547	0.0209198	-0.35944	3.30825e-07	-0.633138	1.21803e-20	-0.500815	4.68261e-10	-0.791511	7.54132e-26
EF1414	conserved hypothetical protein		R	5		K07007	EF1414	-0.0224669	0.779257	-0.360361	3.47252e-06	0.196592	0.00122358	-0.332959	0.000141538	0.13308	0.105609
EF2505	cell wall surface anchor family protein		X	5			EF2505	0.317512	0.00634667	-0.36089	7.89215e-05	-0.618486	4.28859e-13	-0.544386	1.6674e-08	-0.71254	2.23576e-12
EF2162	tRNA delta(2)-isopentenylpyrophosphate transferase	miaA	J	1	2.5.1.8	K00791	EF2161-EF2163	-0.0270807	0.768773	-0.363107	2.00199e-05	0.0906253	0.211911	0.194475	0.034895	-0.0477061	0.6233
EF1579	transcriptional repressor LexA	lexA	KT	1	3.4.21.88	K01356	EF1579	0.51919	3.24493e-10	-0.3636	3.21093e-06	-0.0429833	0.462657	0.831131	5.9415e-27	-0.709597	2.47014e-19
EF1074	hypothetical protein		X	5			EF1074	-0.334078	2.71741e-05	-0.366356	2.05568e-05	-0.831875	6.53677e-36	-0.692748	3.14674e-14	-0.726954	8.84464e-17
EF0268	lysyl-tRNA synthetase	lysS	J	1	6.1.1.6	K04567	EF0261-EF0268	-0.018488	0.920885	-0.367062	0.0427213	-0.288275	0.109031	-0.261588	0.00844584	-0.280341	0.000347514
EF2374	DNA polymerase III, epsilon subunit/ATP-dependent helicase DinG		L	1		K03722	EF2374	-0.0710565	0.477032	-0.368227	7.38489e-05	0.413938	3.52932e-07	-0.68009	4.96344e-18	0.270929	0.000343887
EF2212	conserved hypothetical protein		X	5			EF2212	-0.0844331	0.321425	-0.369583	5.33962e-06	-0.705838	4.09451e-30	-0.594298	4.50312e-10	-0.820799	1.7981e-20
EF1561	shikimate 5-dehydrogenase	aroE	E	3	1.1.1.25	K00014	EF1561-EF1569	0.0205538	0.867832	-0.370439	0.000392239	0.486141	6.13617e-10	0.81681	1.45368e-12	0.31064	0.00749985
EF1073	conserved hypothetical protein		F	3			EF1073	0.416033	0.0448331	-0.371655	0.1237	0.262141	0.209067	-0.0408586	0.842948	-0.178887	0.340842
EF2178	membrane protein, putative		X	4			EF2178-EF2183	0.0270307	0.794636	-0.372139	5.44393e-05	-0.206954	0.0134593	-0.408131	2.75511e-07	-0.496866	1.7969e-10
EF1649	glucose-inhibited division protein	gid	J	1		K04094	EF1649-EF1650	-0.0740495	0.487219	-0.37444	8.71654e-06	-0.335574	1.23176e-06	-0.235207	0.00417678	-0.309344	3.09217e-05
EF0197	ribose 5-phosphate isomerase A	rpiA	G	3	5.3.1.6	K01807	EF0197	-0.0406466	0.696786	-0.374647	0.000109195	-0.543338	4.73988e-11	0.126729	0.211267	-0.542731	8.72197e-09
EF2558	cation transporter		P	2			EF2558	-0.0606834	0.55817	-0.374715	0.00160161	0.963131	7.95647e-34	-0.0193655	0.849239	0.698629	4.67557e-15
EF3118	ribulose-phosphate 3-epimerase	rpe	G	4	5.1.3.1	K01783	EF3117-EF3123	-0.152961	0.0364231	-0.375389	1.40954e-08	0.35408	4.15341e-10	-0.246555	0.00653328	0.473826	1.71462e-10
EF2572	molybdenum transport domain protein		R	3		K02019	EF2563-EF2572	-0.299757	0.0494857	-0.377654	0.0207341	-0.414453	0.00331685	0.02937	0.904731	0.082974	0.596633
EF1410	sugar-binding transcriptional regulator, LacI family		K	1			EF1410	0.000316771	0.9838	-0.377955	0.0234576	0.287873	0.0163947	-0.217169	0.139108	-0.139843	0.386764
EF2429	GMP reductase	guaC	F	3	1.6.6.8	K00364	EF2429	0.802041	5.29739e-14	-0.378718	1.6724e-08	0.487016	2.09503e-08	-0.669353	7.02744e-17	-0.270176	0.000630513
EF1164	HD domain protein		R	1			EF1162-EF1164	-0.0402117	0.675954	-0.380574	1.59962e-05	0.0697494	0.355111	0.780972	2.87056e-16	-0.0053131	0.959769
EF1633	response regulator		T	2		K22010	EF1632-EF1634	0.0133601	0.918298	-0.382656	0.00106881	0.296515	0.000498992	-0.322094	0.0110005	0.132199	0.147695
EF1212	transcriptional regulator		K	1			EF1212	-0.0516529	0.548377	-0.38317	6.78877e-05	-0.210823	0.00396034	-0.0547538	0.549311	-0.249047	0.00301681
EF1371	conserved hypothetical protein		R	5			EF1371-EF1373	0.321481	0.000115526	-0.387726	4.86033e-05	0.384135	8.57899e-08	-0.665006	1.15892e-14	0.0183186	0.827178
EF1596	lipoprotein, putative		X	5			EF1596	0.0435757	0.643306	-0.388307	7.27823e-08	-0.51511	1.06231e-12	-0.644288	7.94665e-10	-0.465164	6.44662e-07
EF0908	conserved hypothetical protein		X	5			EF0908	-0.00189803	0.978629	-0.388414	0.000116849	0.52454	1.35134e-08	-0.526546	4.70716e-11	0.418478	9.55634e-09
EF2915	conserved hypothetical protein TIGR00247		X	1		K07082	EF2914-EF2915	0.0458935	0.639897	-0.389145	2.33123e-05	-0.0339133	0.689059	-0.282135	0.000166382	-0.153859	0.019235
EF2165	NAD-dependent epimerase/dehydratase family protein		M	3		K01784	EF2164-EF2165	-0.00391549	0.971819	-0.389687	3.78783e-08	-0.389851	1.48405e-12	-0.179853	0.0356693	-0.431367	6.27664e-08
EF2873	GTPase of unknown function		R	5		K06948	EF2870-EF2874	0.186456	0.0571572	-0.391762	2.57106e-05	-0.624325	3.69115e-13	-0.298945	3.29828e-05	-0.909811	2.31236e-40
EF2910	potassium uptake protein		P	2		K03499	EF2910	-0.0516404	0.571853	-0.392541	6.53638e-06	0.628612	1.37312e-22	0.0794191	0.400248	0.533939	9.03048e-10
EF1637	ATP:cob(I)alamin adenosyltransferase, putative		S	3		K00798	EF1637-EF1638	-0.0779501	0.733275	-0.393164	0.0725147	0.440614	0.0102111	-0.275065	0.217321	0.445313	0.00564989
EF1773	short chain dehydrogenase		IQR	3		K00059	EF1771-EF1773	-0.149016	0.0862825	-0.394725	9.65736e-06	0.566542	1.92426e-18	-0.161671	0.0986907	0.554425	6.93341e-11
EF2881	3-oxoacyl-(acyl-carrier-protein) reductase	fabG	IQR	3	1.1.1.100	K00059	EF2875-EF2886	-0.437928	0.0144136	-0.398167	0.0238038	-0.0256848	0.885581	-0.65807	3.0869e-12	0.463564	6.13031e-09
EF1779	phosphoribosylglycinamide formyltransferase	purN	X	3	2.1.2.2	K11175	EF1777-EF1786	0.147578	0.236145	-0.400344	0.00197754	0.734446	3.37019e-18	0.0785499	0.56697	0.752648	8.81659e-10
EF3154	conserved hypothetical protein		X	5			EF3154	-0.16352	0.588468	-0.400913	0.169983	-0.13123	0.58731	0.336964	0.21131	0.077422	0.791692
[truncated: 230 more rows]
